# Supplementary material for: Effectiveness of Natural Antioxidants against SARS-CoV-2? Insights from the In-Silico World
Source: MDPI journal article supplement (doi:10.3390/antibiotics10081011), 2021-08-20
Supplement: s1 [file s1]

Table S2a

## Glycyrrhizin docking to nonspecific human blood proteins

| PDB ID | Target                                                                                   | Classification               | Energy kcal/m | Dissoc. constant [nM] | Contacting receptor residues                                                                                                                                                                                                                                                                                                                                                                                                                                                                                                                                                                       |
|--------|------------------------------------------------------------------------------------------|------------------------------|---------------|-----------------------|----------------------------------------------------------------------------------------------------------------------------------------------------------------------------------------------------------------------------------------------------------------------------------------------------------------------------------------------------------------------------------------------------------------------------------------------------------------------------------------------------------------------------------------------------------------------------------------------------|
| 3I7H   | Ddb1 (damage specific DNA binding protein 1)                                             | Protein binding              | -11.36        | 4.6860894             | Asn <sup>16</sup> , Gly <sup>17</sup> , Cys <sup>18</sup> , Val <sup>19</sup> , Thr <sup>20</sup> , Glu <sup>65</sup> , Leu <sup>66</sup> , Thr <sup>118</sup> , Ile <sup>121</sup> , Ile <sup>123</sup> , Ile <sup>124</sup> , Asp <sup>125</sup> , Pro <sup>126</sup> , Asp <sup>166</sup> , Lys <sup>168</sup> , Phe <sup>169</sup> , Tyr <sup>171</sup> , Ser <sup>217</sup> , Met <sup>218</sup> , Ala <sup>221</sup> , Val <sup>259</sup> , Cys <sup>260</sup> , His <sup>261</sup> , Asn <sup>262</sup> , Arg <sup>263</sup> , Glu <sup>312</sup> , Cys <sup>313</sup> , Leu <sup>314</sup> |
| 4U7D   | Human RECQ-like helicase                                                                 | Hydrolase                    | -10.78        | 12.5782793            | Phe <sup>87</sup> , Lys <sup>88</sup> , Leu <sup>89</sup> , Arg <sup>93</sup> , Thr <sup>115</sup> , Gly <sup>116</sup> , Gly <sup>118</sup> , Lys <sup>119</sup> , Ser <sup>120</sup> , Leu <sup>121</sup> , Tyr <sup>123</sup> , Gln <sup>124</sup> , Leu <sup>143</sup> , Asp <sup>146</sup> , Gln <sup>147</sup> , Val <sup>150</sup> , Leu <sup>154</sup> , Asp <sup>219</sup> , Glu <sup>220</sup> , Leu <sup>253</sup> , Gly <sup>377</sup> , Ile <sup>378</sup> , Asp <sup>379</sup> , Pro <sup>381</sup> , Arg <sup>407</sup>                                                             |
| 4FAD   | PI3KA                                                                                    | Transferase                  | -10.66        | 15.4021875            | Glu <sup>384</sup> , Asn <sup>386</sup> , Gln <sup>388</sup> , Gln <sup>391</sup> , Val <sup>393</sup> , Gln <sup>396</sup> , Asn <sup>430</sup> , Gln <sup>432</sup> , Tyr <sup>434</sup> , Leu <sup>460</sup> , Asn <sup>465</sup> , Phe <sup>497</sup> , Lys <sup>501</sup> , Leu <sup>502</sup> , Leu <sup>564</sup> , Pro <sup>566</sup> , Asn <sup>634</sup> , Met <sup>1036</sup> , Ser <sup>1044</sup> , Lys <sup>1045</sup> , Ile <sup>1048</sup>                                                                                                                                         |
| 1W6K   | Human OSC                                                                                | Isomerase                    | -10.54        | 18.9238535            | Arg <sup>8</sup> , Arg <sup>9</sup> , Arg <sup>10</sup> , Gly <sup>11</sup> , Pro <sup>13</sup> , Tyr <sup>14</sup> , Lys <sup>15</sup> , Tyr <sup>54</sup> , Leu <sup>73</sup> , Ser <sup>644</sup> , Ala <sup>645</sup> , Gln <sup>646</sup> , Gln <sup>648</sup> , Leu <sup>682</sup> , Asp <sup>686</sup> , Trp <sup>687</sup> , Pro <sup>688</sup> , Gln <sup>689</sup> , Glu <sup>690</sup> , Asn <sup>691</sup> , Arg <sup>708</sup>                                                                                                                                                        |
| 4NY0   | Human focal adhesion kinase                                                              | Transferase                  | -10.52        | 19.3436641            | Tyr <sup>42</sup> , Arg <sup>86</sup> , Ser <sup>88</sup> , Val <sup>95</sup> , Lys <sup>121</sup> , Glu <sup>123</sup> , Lys <sup>125</sup> , Arg <sup>127</sup> , Arg <sup>154</sup> , Leu <sup>157</sup> , Glu <sup>158</sup> , Tyr <sup>251</sup> , Arg <sup>252</sup> , Phe <sup>253</sup> , Lys <sup>255</sup> , Glu <sup>256</sup> , Cys <sup>257</sup> , Phe <sup>258</sup> , Ile <sup>336</sup> , Asn <sup>339</sup> , Leu <sup>343</sup>                                                                                                                                                 |
| 5FFG   | Integrin alpha V Beta 6 head                                                             | Cell adhesion                | -10.3         | 28.0414766            | Asp <sup>24</sup> , Phe <sup>25</sup> , Phe <sup>26</sup> , Val <sup>27</sup> , Met <sup>34</sup> , Ser <sup>100</sup> , Lys <sup>101</sup> , Gln <sup>102</sup> , Asp <sup>162</sup> , Phe <sup>163</sup> , Thr <sup>164</sup> , Lys <sup>165</sup> , Val <sup>228</sup> , Gln <sup>352</sup> , Lys <sup>410</sup> , Gly <sup>411</sup> , Ala <sup>412</sup> , Thr <sup>413</sup> , Asp <sup>414</sup> , Lys <sup>417</sup> , Gly <sup>419</sup> , Pro <sup>421</sup>                                                                                                                             |
| 2QFZ   | Human tbc1 domain family member 22a                                                      | Hydrolase activator          | -9.87         | 58.0400859            | Arg <sup>216</sup> , Leu <sup>235</sup> , Ser <sup>236</sup> , Gly <sup>237</sup> , Lys <sup>269</sup> , Asp <sup>272</sup> , Gly <sup>273</sup> , Ile <sup>274</sup> , Gln <sup>275</sup> , Asp <sup>276</sup> , Lys <sup>388</sup> , Tyr <sup>442</sup> , Gln <sup>443</sup> , Glu <sup>445</sup> , Pro <sup>446</sup> , Asp <sup>447</sup> , Gly <sup>448</sup> , Phe <sup>449</sup> , Ser <sup>450</sup>                                                                                                                                                                                       |
| 3EHT   | The extracellular domain of human corticotropin releasing factor receptor type 1 (crfr1) | Membrane protein             | -9.82         | 63.3642891            | Gln <sup>277</sup> , Asp <sup>254</sup> , Ala <sup>253</sup> , Arg <sup>251</sup> , Tyr <sup>250</sup> , Asn <sup>249</sup> , Gly <sup>248</sup> , Tyr <sup>178</sup> , Gly <sup>175</sup> , Lys <sup>174</sup> , Tyr <sup>173</sup> , Ile <sup>171</sup> , Ile <sup>20</sup> , Met <sup>19</sup> , Pro <sup>18</sup> , Asn <sup>17</sup> , Ile <sup>16</sup> , Pro <sup>15</sup> , Gln <sup>14</sup>                                                                                                                                                                                              |
| 6FFI   | MGLUR5 in complex with MMPEP                                                             | Membrane protein             | -9.82         | 63.9012891            | Tyr <sup>572</sup> , Leu <sup>535</sup> , Gln <sup>647</sup> , Ile <sup>651</sup> , Glu <sup>888</sup> , Val <sup>889</sup> , Tyr <sup>890</sup> , Leu <sup>891</sup> , Ile <sup>892</sup> , Cys <sup>893</sup> , Thr <sup>895</sup> , Thr <sup>896</sup> , Asn <sup>897</sup> , Val <sup>900</sup> , Tyr <sup>952</sup> , Asn <sup>956</sup> , Tyr <sup>957</sup> , Lys <sup>958</sup> , Ile <sup>959</sup> , Met <sup>962</sup>                                                                                                                                                                  |
| 4WB7   | Camp-dependent protein kinase a (catalytic alpha subunit)                                | Transferase                  | -9.72         | 74.6356797            | Lys <sup>3</sup> , Asp <sup>3</sup> , Gln <sup>6</sup> , Thr <sup>7</sup> , Gln <sup>26</sup> , Tyr <sup>30</sup> , Pro <sup>38</sup> , Gly <sup>39</sup> , Glu <sup>42</sup> , Lys <sup>43</sup> , Glu <sup>46</sup> , Ile <sup>47</sup> , Asp <sup>322</sup> , Asn <sup>326</sup> , Phe <sup>336</sup> , Asn <sup>341</sup> , Asn <sup>344</sup> , Asp <sup>345</sup> , Asn <sup>348</sup> , His <sup>349</sup> , Lys <sup>350</sup>                                                                                                                                                             |
| 5T40   | Human EXOG (hexog)                                                                       | Hydrolase                    | -9.66         | 83.2898594            | Arg <sup>109</sup> , Lys <sup>110</sup> , Cys <sup>112</sup> , Lys <sup>113</sup> , Phe <sup>114</sup> , Arg <sup>138</sup> , His <sup>140</sup> , Pro <sup>143</sup> , Ala <sup>144</sup> , Gly <sup>145</sup> , Phe <sup>158</sup> , Asn <sup>171</sup> , Ser <sup>172</sup> , Trp <sup>175</sup> , Asn <sup>176</sup> , Glu <sup>179</sup> , Phe <sup>307</sup> , Leu <sup>311</sup> , Arg <sup>314</sup>                                                                                                                                                                                       |
| 2XMS   | Human NDRG2 protein                                                                      | Signaling protein            | -9.66         | 83.4305547            | Lys <sup>162</sup> , His <sup>170</sup> , Thr <sup>173</sup> , Ser <sup>177</sup> , Glu <sup>181</sup> , Met <sup>182</sup> , Leu <sup>184</sup> , Gly <sup>185</sup> , His <sup>186</sup> , Phe <sup>188</sup> , Ser <sup>189</sup> , Gln <sup>190</sup> , Glu <sup>191</sup> , Leu <sup>193</sup> , Arg <sup>204</sup> , Gln <sup>250</sup> , Ala <sup>251</sup> , Pro <sup>252</sup>                                                                                                                                                                                                            |
| 3VJ9   | The human squalene synthase                                                              | Transferase                  | -9.62         | 88.8068594            | Leu <sup>76</sup> , Arg <sup>77</sup> , Asp <sup>80</sup> , Arg <sup>84</sup> , Met <sup>86</sup> , Glu <sup>116</sup> , Lys <sup>117</sup> , Tyr <sup>171</sup> , Val <sup>175</sup> , Leu <sup>211</sup> , Gln <sup>212</sup> , Asn <sup>215</sup> , Ile <sup>216</sup> , Asp <sup>219</sup> , Glu <sup>222</sup> , Asp <sup>223</sup> , Gly <sup>226</sup> , Arg <sup>228</sup> , Phe <sup>230</sup>                                                                                                                                                                                            |
| 2JOS   | Exon junction                                                                            | Hydrolase                    | -9.62         | 89.2576641            | Lys <sup>25</sup> , Val <sup>26</sup> , Glu <sup>27</sup> , Phe <sup>28</sup> , Gln <sup>81</sup> , Leu <sup>221</sup> , Pro <sup>222</sup> , His <sup>223</sup> , Glu <sup>224</sup> , Leu <sup>226</sup> , Leu <sup>240</sup> , Val <sup>241</sup> , Lys <sup>242</sup> , Arg <sup>243</sup> , Asn <sup>357</sup> , Arg <sup>358</sup> , Glu <sup>359</sup> , Tyr <sup>395</sup>                                                                                                                                                                                                                 |
| 2G6P   | Truncated (delta 1-89) human methionine aminopeptidase type 1                            | Hydrolase                    | -9.6          | 92.4780625            | Ser <sup>125</sup> , Glu <sup>128</sup> , Gln <sup>129</sup> , Leu <sup>131</sup> , Lys <sup>132</sup> , Gly <sup>133</sup> , Thr <sup>134</sup> , Tyr <sup>195</sup> , Tyr <sup>196</sup> , His <sup>212</sup> , Ser <sup>299</sup> , Tyr <sup>300</sup> , Cys <sup>301</sup> , His <sup>310</sup> , Thr <sup>311</sup> , Ala <sup>312</sup> , Asn <sup>314</sup> , Thr <sup>348</sup> , Gly <sup>352</sup> , Trp <sup>353</sup>                                                                                                                                                                  |
| 3MWE   | Truncated human ATP-citrate lyase                                                        | Transferase                  | -9.53         | 103.3754453           | Lys <sup>4</sup> , Ala <sup>223</sup> , Thr <sup>224</sup> , Asp <sup>226</sup> , Lys <sup>230</sup> , Trp <sup>233</sup> , Gly <sup>234</sup> , Asp <sup>235</sup> , Ile <sup>236</sup> , Glu <sup>237</sup> , Phe <sup>238</sup> , Pro <sup>240</sup> , Glu <sup>250</sup> , Ala <sup>251</sup> , Ile <sup>253</sup> , Ala <sup>254</sup> , Asp <sup>255</sup> , Asp <sup>257</sup> , Ala <sup>258</sup> , Leu <sup>264</sup> , Lys <sup>265</sup> , Leu <sup>266</sup> , Thr <sup>267</sup>                                                                                                     |
| 3OE9   | the chemokine CXCR4 receptor                                                             | Signaling protein, hydrolase | -9.5          | 108.5612031           | Asp <sup>1010</sup> , Glu <sup>1011</sup> , Gly <sup>1012</sup> , Arg <sup>1014</sup> , Tyr <sup>1018</sup> , Lys <sup>1019</sup> , Tyr <sup>1024</sup> , Thr <sup>1026</sup> , Gly <sup>1028</sup> , Ile <sup>1029</sup> , Gly <sup>1030</sup> , His <sup>1031</sup> , Leu <sup>1032</sup> , Asp <sup>1070</sup> , Ala <sup>1073</sup> , Ala <sup>1074</sup> , Val <sup>1103</sup> , Phe <sup>1104</sup> , Gln <sup>1105</sup> , Met <sup>1106</sup> , Gly <sup>1107</sup> , Glu <sup>1108</sup> , Trp <sup>1138</sup> , Thr <sup>1142</sup> , Arg <sup>1145</sup>                                |
| 5FN3   | Gamma secretase in class 1 of the apo-state ensemble                                     | Hydrolase                    | -9.5          | 108.9282891           | Asn <sup>55</sup> , Val <sup>138</sup> , Gln <sup>139</sup> , Cys <sup>140</sup> , Pro <sup>141</sup> , Asn <sup>142</sup> , Asp <sup>143</sup> , Gly <sup>144</sup> , Phe <sup>145</sup> , His <sup>158</sup> , Cys <sup>159</sup> , Arg <sup>160</sup> , Gln <sup>163</sup> , Tyr <sup>173</sup> , Asp <sup>336</sup> , Thr <sup>643</sup> , Trp <sup>648</sup>                                                                                                                                                                                                                                  |
| 4UV8   | LSD1(KDM1A)-CoRest                                                                       | Transcription                | -9.46         | 116.9303047           | Gln <sup>228</sup> , Thr <sup>230</sup> , Phe <sup>231</sup> , His <sup>250</sup> , His <sup>253</sup> , Ser <sup>254</sup> , Glu <sup>257</sup> , Arg <sup>258</sup> , Tyr <sup>267</sup> , Arg <sup>269</sup> , Lys <sup>271</sup> , Pro <sup>274</sup> , Thr <sup>278</sup> , Ser <sup>299</sup> , Phe <sup>300</sup> , Gly <sup>301</sup> , Ala <sup>826</sup> , Leu <sup>830</sup> , Gly <sup>831</sup> , Met <sup>833</sup>                                                                                                                                                                  |
| 1ZXN   | Human topo IIA ATPASE/AMP-PNP                                                            | Isomerase                    | -9.43         | 121.7641172           | Gln <sup>60</sup> , Met <sup>61</sup> , Trp <sup>62</sup> , Tyr <sup>72</sup> , Arg <sup>41</sup> , Phe <sup>308</sup> , Gln <sup>309</sup> , Gln <sup>310</sup> , Ile <sup>111</sup> , Ser <sup>320</sup> , Lys <sup>321</sup> , Gly <sup>322</sup> , Gly <sup>323</sup> , Arg <sup>324</sup> , Asp <sup>327</sup> , His <sup>354</sup> , Lys <sup>357</sup> , Asn <sup>380</sup>                                                                                                                                                                                                                 |
| 5A2E   | Extracellular SRCR domains of human CD6                                                  | Immune system                | -9.43         | 121.9698047           | Asn <sup>49</sup> , Gly <sup>50</sup> , Ser <sup>51</sup> , Thr <sup>57</sup> , Leu <sup>97</sup> , Ala <sup>98</sup> , Pro <sup>99</sup> , Pro <sup>100</sup> , Arg <sup>150</sup> , Arg <sup>152</sup> , Ala <sup>160</sup> , Leu <sup>161</sup> , Arg <sup>162</sup> , Arg <sup>200</sup> , Gln <sup>201</sup> , Leu <sup>202</sup> , Gly <sup>203</sup> , Tyr <sup>236</sup>                                                                                                                                                                                                                   |
| 5IOH   | Repoman-PP1A (protein phosphatase 1, alpha isoform) holoenzyme                           | Hydrolase/protein binding    | -9.42         | 124.8862031           | His <sup>56</sup> , Arg <sup>96</sup> , Asn <sup>124</sup> , His <sup>125</sup> , Trp <sup>206</sup> , Pro <sup>209</sup> , Asp <sup>210</sup> , Lys <sup>211</sup> , Asp <sup>212</sup> , Asp <sup>220</sup> , Arg <sup>221</sup> , Thr <sup>226</sup> , His <sup>248</sup> , Gln <sup>249</sup> , Val <sup>250</sup> , Glu <sup>256</sup> , Phe <sup>258</sup> , Tyr <sup>272</sup> , Phe <sup>276</sup>                                                                                                                                                                                         |
| 4JKJ   | The S18Y variant of ubiquitin carboxy-terminal hydrolase1                                | Hydrolase                    | -9.32         | 146.8531875           | Met <sup>1</sup> , Gln <sup>2</sup> , Leu <sup>55</sup> , Thr <sup>56</sup> , Ala <sup>57</sup> , Glu <sup>60</sup> , Thr <sup>85</sup> , Ile <sup>86</sup> , Gly <sup>87</sup> , Asn <sup>88</sup> , Cys <sup>90</sup> , Asp <sup>155</sup> , Lys <sup>157</sup> , Val <sup>158</sup> , Asn <sup>159</sup> , Phe <sup>160</sup> , His <sup>161</sup> , Arg <sup>178</sup>                                                                                                                                                                                                                         |
| 6F39   | C1R homodimer CUB1-EGF-CUB2                                                              | Hydrolase                    | -9.27         | 160.3245              | Gly <sup>36</sup> , Tyr <sup>37</sup> , Arg <sup>38</sup> , Gln <sup>91</sup> , Gly <sup>92</sup> , Asn <sup>93</sup> , Asp <sup>125</sup> , Leu <sup>126</sup> , Asp <sup>127</sup> , Glu <sup>128</sup> , Ser <sup>133</sup> , Asp <sup>139</sup> , Pro <sup>140</sup> , Gln <sup>141</sup> , Pro <sup>142</sup> , Gly <sup>154</sup> , Tyr <sup>155</sup> , Phe <sup>156</sup> , Glu <sup>167</sup> , Asp <sup>168</sup> , Thr <sup>169</sup> , His <sup>170</sup>                                                                                                                              |
| 1OE9   | Myosin V motor                                                                           | ATPASE/myosin                | -9.16         | 192.0577969           | Asn <sup>111</sup> , Tyr <sup>113</sup> , Ser <sup>165</sup> , Gly <sup>166</sup> , Ala <sup>167</sup> , Gly <sup>168</sup> , Lys <sup>169</sup> , Thr <sup>170</sup> , Val <sup>171</sup> , Lys <sup>174</sup> , Leu <sup>197</sup> , Ala <sup>198</sup> , Asn <sup>200</sup> , Pro <sup>201</sup> , Glu <sup>204</sup> , Asn <sup>208</sup> , Asn <sup>214</sup> , Asn <sup>215</sup> , Asn <sup>216</sup> , Gln <sup>217</sup> , Ala <sup>218</sup> , Leu <sup>219</sup>                                                                                                                        |
| 2FM5   | PDE4D2                                                                                   | Hydrolase                    | -9.16         | 192.3822344           | Ile <sup>79</sup> , Pro <sup>80</sup> , Lys <sup>85</sup> , Thr <sup>86</sup> , Gln <sup>88</sup> , Glu <sup>89</sup> , Leu <sup>92</sup> , Ala <sup>93</sup> , Leu <sup>96</sup> , Glu <sup>97</sup> , Val <sup>99</sup> , Leu <sup>112</sup> , Ser <sup>113</sup> , Arg <sup>116</sup> , Thr <sup>119</sup> , Val <sup>120</sup> , His <sup>123</sup> , Thr <sup>124</sup> , Gln <sup>127</sup> , Glu <sup>128</sup> , Ile <sup>143</sup> , Met <sup>147</sup>                                                                                                                                   |
| 5WG5   | Human GRK2                                                                               | Transferase                  | -9.12         | 206.166625            | Lys <sup>30</sup> , Lys <sup>31</sup> , Ile <sup>32</sup> , Leu <sup>33</sup> , Val <sup>180</sup> , Asn <sup>183</sup> , Ile <sup>184</sup> , His <sup>185</sup> , Leu <sup>186</sup> , Asn <sup>189</sup> , Asp <sup>190</sup> , Lys <sup>210</sup> , Ala <sup>211</sup> , Asp <sup>212</sup> , Glu <sup>618</sup> , Arg <sup>617</sup> , Lys <sup>618</sup> , Gln <sup>633</sup> , Cys <sup>634</sup> , Asp <sup>635</sup> , Ser <sup>636</sup> , Asp <sup>637</sup> , Leu <sup>640</sup>                                                                                                       |
| 3HRZ   | Human factor B                                                                           | Immune system                | -9.11         | 210.3848594           | Thr <sup>326</sup> , Lys <sup>327</sup> , Tyr <sup>343</sup> , Asp <sup>348</sup> , Gly <sup>349</sup> , Ser <sup>350</sup> , Pro <sup>351</sup> , Arg <sup>497</sup> , Trp <sup>515</sup> , Asp <sup>578</sup> , His <sup>581</sup> , Lys <sup>582</sup> , Ser <sup>583</sup> , Asp <sup>584</sup> , Gly <sup>586</sup> , Cys <sup>587</sup> , Thr <sup>588</sup> , Ala <sup>589</sup> , Lys <sup>591</sup> , Cys <sup>592</sup> , Pro <sup>593</sup> , Gln <sup>623</sup> , Gln <sup>624</sup>                                                                                                   |
| 4MWS   | Human PPCA (trigonal crystal form 1)                                                     | Hydrolase                    | -9.08         | 219.4520781           | Gly <sup>57</sup> , Ser <sup>150</sup> , Tyr <sup>151</sup> , Tyr <sup>183</sup> , Asp <sup>187</sup> , Leu <sup>190</sup> , Val <sup>191</sup> , Phe <sup>220</sup> , Tyr <sup>221</sup> , Asp <sup>222</sup> , Leu <sup>222</sup> , Gln <sup>233</sup> , Val <sup>235</sup> , Ala <sup>236</sup> , Gly <sup>240</sup> , Ile <sup>246</sup> , Tyr <sup>247</sup> , Pro <sup>301</sup> , Pro <sup>302</sup> , Arg <sup>344</sup> , Ala <sup>374</sup> , Cys <sup>375</sup> , His <sup>429</sup>                                                                                                    |
| 5Z90   | BRD4 bromodomain 1                                                                       | Transcription                | -9.05         | 230.8500625           | Pro <sup>45</sup> , Pro <sup>46</sup> , Pro <sup>47</sup> , Tyr <sup>48</sup> , Glu <sup>49</sup> , Lys <sup>55</sup> , Tyr <sup>98</sup> , Ile <sup>101</sup> , Lys <sup>102</sup> , Thr <sup>103</sup> , Pro <sup>104</sup> , Met <sup>105</sup> , Ile <sup>113</sup> , Tyr <sup>118</sup> , Tyr <sup>119</sup> , Gln <sup>127</sup> , Asp <sup>128</sup> , Thr <sup>131</sup>                                                                                                                                                                                                                   |
| 3PUF   | Human RNASE H2 complex                                                                   | Hydrolase                    | -9.02         | 243.25025             | Asp <sup>34</sup> , Glu <sup>35</sup> , Gly <sup>37</sup> , Arg <sup>38</sup> , Gly <sup>39</sup> , Pro <sup>40</sup> , Asp <sup>67</sup> , Ser <sup>68</sup> , Lys <sup>69</sup> , Leu <sup>71</sup> , Glu <sup>73</sup> , Arg <sup>76</sup> , Asp <sup>141</sup> , Val <sup>143</sup> , Asp <sup>169</sup> , Ser <sup>179</sup> , Lys <sup>183</sup> , Arg <sup>186</sup> , Asp <sup>187</sup> , Gly <sup>207</sup> , Ser <sup>208</sup> , Tyr <sup>210</sup> , Lys <sup>215</sup>                                                                                                               |
| 4URW   | RAS:SOS complex                                                                          | Signaling protein            | -9.01         | 250.7537813           | Leu <sup>23</sup> , Ile <sup>24</sup> , Gln <sup>25</sup> , Asn <sup>26</sup> , His <sup>27</sup> , Val <sup>29</sup> , Glu <sup>31</sup> , Tyr <sup>32</sup> , Asp <sup>33</sup> , Ile <sup>36</sup> , Asp <sup>38</sup> , Ser <sup>39</sup> , Arg <sup>41</sup> , Lys <sup>42</sup> , Gln <sup>43</sup> , Val <sup>44</sup> , Val <sup>45</sup> , Glu <sup>153</sup> , Tyr <sup>157</sup>                                                                                                                                                                                                        |
| 3EHI   | Human thymidylate synthase M190K                                                         | Transferase                  | -8.95         | 274.681875            | Lys <sup>93</sup> , Gly <sup>94</sup> , Ser <sup>95</sup> , Thr <sup>96</sup> , Asn <sup>97</sup> , Glu <sup>100</sup> , Phe <sup>137</sup> , Arg <sup>140</sup> , His <sup>141</sup> , Met <sup>149</sup> , Glu <sup>150</sup> , Ser <sup>151</sup> , Asp <sup>152</sup> , Tyr <sup>153</sup> , Ser <sup>154</sup> , Gln <sup>162</sup> , Lys <sup>287</sup> , Asp <sup>289</sup>                                                                                                                                                                                                                 |
| 5CSX   | The S156E mutant of human aquaporin 5                                                    | Transport protein            | -8.95         | 275.145875            | Ala <sup>57</sup> , Gln <sup>58</sup> , Gly <sup>61</sup> , Pro <sup>62</sup> , Gly <sup>65</sup> , Gly <sup>66</sup> , Leu <sup>76</sup> , Gln <sup>81</sup> , Ile <sup>82</sup> , Arg <sup>86</sup> , Phe <sup>147</sup> , Ser <sup>149</sup> , Thr <sup>150</sup> , Asp <sup>151</sup> , Ser <sup>152</sup> , Arg <sup>153</sup> , Pro <sup>161</sup> , Ala <sup>162</sup> , Ile <sup>165</sup> , Tyr <sup>243</sup> , Pro <sup>245</sup>                                                                                                                                                       |

| PDB ID | Target                                                                      | Classification                | Energy kcal/m | Dissoc. constant [nM] | Contacting receptor residues                                                                                                                                                                                                                                                                                                                                                                                                                           |
|--------|-----------------------------------------------------------------------------|-------------------------------|---------------|-----------------------|--------------------------------------------------------------------------------------------------------------------------------------------------------------------------------------------------------------------------------------------------------------------------------------------------------------------------------------------------------------------------------------------------------------------------------------------------------|
| 1IKN   | IKAPPABALPHA/NF-KAPPAB complex                                              | Transcription factor          | -8.94         | 279.82925             | Arg <sup>50</sup> , Thr <sup>52</sup> , Lys <sup>221</sup> , Glu <sup>222</sup> , Asp <sup>223</sup> , Ile <sup>224</sup> , Glu <sup>225</sup> , Tyr <sup>227</sup> , Glu <sup>234</sup> , Ala <sup>235</sup> , Arg <sup>236</sup> , Gly <sup>237</sup> , Ser <sup>238</sup> , Phe <sup>239</sup> , Ser <sup>240</sup> , Gln <sup>241</sup> , Arg <sup>273</sup> , Pro <sup>275</sup>                                                                  |
| 3UVU   | Flap endonuclease 1 (FEN1)                                                  | Protein binding/peptide       | -8.93         | 284.5923438           | Leu <sup>104</sup> , Ser <sup>105</sup> , Arg <sup>106</sup> , Glu <sup>107</sup> , Pro <sup>110</sup> , Ile <sup>112</sup> , Asn <sup>146</sup> , Ala <sup>148</sup> , Ser <sup>149</sup> , Gly <sup>150</sup> , Thr <sup>151</sup> , Ser <sup>152</sup> , Thr <sup>155</sup> , Trp <sup>184</sup> , Asn <sup>188</sup> , Gly <sup>191</sup> , Asp <sup>192</sup> , Trp <sup>231</sup> , Asn <sup>235</sup> , Arg <sup>238</sup> , Tyr <sup>277</sup> |
| 4JXJ   | ribosomal RNA small subunit methyltransferase a from rickettsia bellii      | Transferase                   | -8.92         | 290.9057813           | Ser <sup>38</sup> , Gly <sup>39</sup> , Leu <sup>40</sup> , Glu <sup>41</sup> , Ser <sup>44</sup> , Asn <sup>45</sup> , Lys <sup>110</sup> , Thr <sup>112</sup> , Ser <sup>133</sup> , Ser <sup>134</sup> , Val <sup>136</sup> , Ala <sup>137</sup> , Ser <sup>138</sup> , Lys <sup>196</sup> , Thr <sup>198</sup> , Pro <sup>199</sup> , Leu <sup>200</sup> , Glu <sup>201</sup> , Ile <sup>203</sup>                                                 |
| 5GNT   | BDLP-like folding of Mitofusin 1                                            | Hydrolase                     | -8.91         | 293.8667188           | Val <sup>70</sup> , Arg <sup>73</sup> , Arg <sup>74</sup> , His <sup>75</sup> , Leu <sup>197</sup> , Asp <sup>198</sup> , Ala <sup>199</sup> , Asp <sup>200</sup> , Leu <sup>227</sup> , Ser <sup>228</sup> , Lys <sup>229</sup> , Pro <sup>230</sup> , Asn <sup>231</sup> , Ser <sup>331</sup> , Thr <sup>335</sup> , Lys <sup>336</sup> , Gln <sup>339</sup>                                                                                         |
| 4ZMV   | Human P-cadherin (SS-X-dimer pocket I)                                      | Cell adhesion                 | -8.87         | 316.5212188           | Met <sup>0</sup> , Asp <sup>1</sup> , Trp <sup>2</sup> , Val <sup>3</sup> , Ile <sup>4</sup> , Lys <sup>25</sup> , Ser <sup>26</sup> , Asn <sup>27</sup> , Lys <sup>28</sup> , Phe <sup>77</sup> , Val <sup>88</sup> , Glu <sup>89</sup> , Asp <sup>90</sup> , Pro <sup>91</sup> , Met <sup>92</sup> , Asn <sup>93</sup>                                                                                                                               |
| 4E49   | Carbonic anhydrase (CA)                                                     | Lyase                         | -8.85         | 323.5429688           | His <sup>4</sup> , Trp <sup>5</sup> , Gly <sup>6</sup> , Tyr <sup>7</sup> , Gly <sup>8</sup> , His <sup>10</sup> , Asn <sup>11</sup> , His <sup>15</sup> , Lys <sup>18</sup> , Asp <sup>19</sup> , Gly <sup>63</sup> , His <sup>64</sup> , Lys <sup>170</sup> , Phe <sup>231</sup> , Asn <sup>232</sup> , Glu <sup>236</sup> , Pro <sup>237</sup> , Glu <sup>238</sup> , Glu <sup>239</sup>                                                            |
| 5HKJ   | Single chain recombinant globular head of the complement system protein C1Q | Signaling protein             | -8.81         | 346.7251563           | Tyr <sup>49</sup> , Ser <sup>68</sup> , Ser <sup>70</sup> , Arg <sup>75</sup> , Arg <sup>76</sup> , Ser <sup>77</sup> , Leu <sup>98</sup> , Gln <sup>99</sup> , Leu <sup>100</sup> , Asp <sup>104</sup> , Val <sup>168</sup> , Leu <sup>169</sup> , Thr <sup>170</sup> , Asn <sup>171</sup> , Pro <sup>172</sup> , Gly <sup>174</sup>                                                                                                                  |
| 5K10   | Isocitrate dehydrogenase (IDH1)                                             | Oxidoreductase                | -8.8          | 355.6153438           | Ile <sup>112</sup> , Ile <sup>113</sup> , Cys <sup>114</sup> , Lys <sup>115</sup> , Val <sup>125</sup> , Lys <sup>126</sup> , Pro <sup>127</sup> , Leu <sup>201</sup> , Ser <sup>202</sup> , Lys <sup>203</sup> , Gly <sup>204</sup> , Trp <sup>205</sup> , Gln <sup>242</sup> , Lys <sup>243</sup> , Ile <sup>244</sup> , Arg <sup>244</sup> , Asn <sup>357</sup> , Glu <sup>357</sup> , Glu <sup>361</sup> , Ile <sup>364</sup> , Glu <sup>368</sup> |
| 3GR4   | Human pyruvate kinase M2                                                    | Transferase                   | -8.78         | 367.2042188           | Phe <sup>26</sup> , Leu <sup>308</sup> , Lys <sup>311</sup> , Met <sup>312</sup> , Gly <sup>315</sup> , Asn <sup>318</sup> , Arg <sup>319</sup> , Leu <sup>353</sup> , Asp <sup>354</sup> , Ile <sup>389</sup> , Tyr <sup>390</sup> , Gln <sup>393</sup> , Leu <sup>394</sup> , Glu <sup>397</sup> , Leu <sup>398</sup> , Leu <sup>401</sup> , Arg <sup>445</sup>                                                                                      |
| 4NYH   | Pir1 dual specificity phosphatase core                                      | Hydrolase                     | -8.77         | 374.7173438           | His <sup>30</sup> , Ile <sup>31</sup> , Pro <sup>32</sup> , Glu <sup>33</sup> , Arg <sup>34</sup> , Lys <sup>36</sup> , Lys <sup>64</sup> , Tyr <sup>95</sup> , Thr <sup>96</sup> , Gln <sup>97</sup> , Tyr <sup>99</sup> , Gly <sup>118</sup> , His <sup>119</sup> , Thr <sup>153</sup> , His <sup>154</sup> , Arg <sup>158</sup>                                                                                                                     |
| 2Q7N   | LIF receptor (domains 1-5)                                                  | CYTOKINE receptor/CYTOKI NE   | -8.76         | 377.893               | Met <sup>15</sup> , Arg <sup>16</sup> , Trp <sup>18</sup> , Asp <sup>40</sup> , Arg <sup>41</sup> , Ala <sup>57</sup> , Leu <sup>58</sup> , Ser <sup>59</sup> , Pro <sup>60</sup> , Glu <sup>81</sup> , Gly <sup>113</sup> , Ser <sup>114</sup> , Ala <sup>115</sup> , Leu <sup>116</sup> , Pro <sup>117</sup> , His <sup>118</sup> , Ser <sup>147</sup> , Gly <sup>148</sup> , His <sup>180</sup> , Phe <sup>181</sup>                                |
| 2QX4   | Quinone reductase ii                                                        | Oxidoreductase                | -8.74         | 394.8454063           | Tyr <sup>67</sup> , Tyr <sup>104</sup> , Trp <sup>105</sup> , Phe <sup>106</sup> , Ser <sup>107</sup> , Val <sup>108</sup> , Ala <sup>110</sup> , Lys <sup>113</sup> , Met <sup>116</sup> , Asp <sup>117</sup> , Leu <sup>120</sup> , Cys <sup>121</sup> , Phe <sup>126</sup> , Pro <sup>170</sup> , Leu <sup>171</sup> , Gly <sup>174</sup> , Thr <sup>175</sup> , Phe <sup>178</sup>                                                                 |
| 4W9O   | The FK1 domain of FKBP51                                                    | Isomerase                     | -8.71         | 413.9533125           | Tyr <sup>57</sup> , Phe <sup>67</sup> , Asp <sup>68</sup> , Phe <sup>77</sup> , Gly <sup>84</sup> , Gln <sup>85</sup> , Val <sup>86</sup> , Ile <sup>87</sup> , Lys <sup>88</sup> , Trp <sup>90</sup> , Tyr <sup>111</sup> , Ala <sup>112</sup> , Tyr <sup>113</sup> , Ile <sup>122</sup> , Leu <sup>128</sup> , Phe <sup>130</sup>                                                                                                                    |
| 4ZWJ   | Rhodopsin bound to arrestin                                                 | Signaling protein             | -8.7          | 418.8730625           | Thr <sup>242</sup> , Lys <sup>311</sup> , Gln <sup>312</sup> , Asn <sup>315</sup> , Thr <sup>2063</sup> , Glu <sup>2071</sup> , Asp <sup>2072</sup> , Val <sup>2075</sup> , Phe <sup>2080</sup> , Arg <sup>2081</sup> , Asp <sup>2083</sup> , Glu <sup>2149</sup> , Lys <sup>2151</sup> , Glu <sup>2162</sup> , Asp <sup>2163</sup> , Lys <sup>2164</sup> , Ile <sup>2165</sup> , Lys <sup>2167</sup>                                                  |
| 4IP9   | Human serum amyloid A1                                                      | Protein binding               | -8.69         | 423.8512813           | Ala <sup>14</sup> , Met <sup>17</sup> , Trp <sup>18</sup> , Tyr <sup>21</sup> , Met <sup>24</sup> , Asp <sup>33</sup> , His <sup>37</sup> , Ile <sup>58</sup> , Arg <sup>62</sup> , Ile <sup>65</sup> , Gln <sup>66</sup> , Phe <sup>69</sup> , His <sup>71</sup> , Asp <sup>79</sup>                                                                                                                                                                  |
| 2UW9   | PKB-Beta (AKT2)                                                             | Transferase                   | -8.69         | 428.1654063           | Trp <sup>334</sup> , Glu <sup>366</sup> , Ile <sup>367</sup> , Phe <sup>369</sup> , Lys <sup>378</sup> , Ser <sup>379</sup> , Ala <sup>382</sup> , Gly <sup>383</sup> , Leu <sup>385</sup> , Lys <sup>386</sup> , Lys <sup>387</sup> , Lys <sup>390</sup> , Gln <sup>391</sup> , Arg <sup>392</sup> , Leu <sup>393</sup> , Gly <sup>394</sup> , Gly <sup>395</sup> , Gly <sup>396</sup> , Glu <sup>402</sup> , His <sup>406</sup>                      |
| 4OJ2   | Aquaporin                                                                   | Transport protein             | -8.68         | 433.2540625           | Phe <sup>9</sup> , Ala <sup>12</sup> , Val <sup>16</sup> , Gln <sup>57</sup> , Gly <sup>60</sup> , His <sup>61</sup> , Ile <sup>62</sup> , Ser <sup>63</sup> , Gly <sup>64</sup> , His <sup>80</sup> , Val <sup>81</sup> , Arg <sup>85</sup> , Tyr <sup>89</sup> , Ser <sup>148</sup> , Thr <sup>149</sup> , Glu <sup>151</sup> , Pro <sup>160</sup> , Ala <sup>161</sup>                                                                              |
| 4GWN   | Human mature MEPRIN Beta                                                    | Hydrolase                     | -8.67         | 442.1185625           | Val <sup>374</sup> , Glu <sup>375</sup> , Ile <sup>377</sup> , Lys <sup>378</sup> , Glu <sup>379</sup> , Ile <sup>380</sup> , Pro <sup>381</sup> , Gln <sup>386</sup> , Leu <sup>387</sup> , Tyr <sup>388</sup> , His <sup>389</sup> , Val <sup>390</sup> , Thr <sup>391</sup> , Cys <sup>427</sup> , Pro <sup>428</sup> , His <sup>429</sup> , His <sup>430</sup> , Ile <sup>431</sup> , His <sup>433</sup> , Phe <sup>453</sup>                      |
| 3I69   | Apo Glutathione transferase A1-1 GIMF-helix                                 | Transferase                   | -8.57         | 519.00875             | Lys <sup>1</sup> , Leu <sup>23</sup> , Ala <sup>24</sup> , Gly <sup>27</sup> , Val <sup>28</sup> , Glu <sup>29</sup> , Phe <sup>30</sup> , Glu <sup>31</sup> , Glu <sup>32</sup> , Phe <sup>34</sup> , Thr <sup>193</sup> , Lys <sup>196</sup> , Phe <sup>197</sup> , Gln <sup>199</sup> , Pro <sup>200</sup> , Gly <sup>201</sup> , Ser <sup>202</sup> , Pro <sup>203</sup>                                                                           |
| 4GWG   | 6-phosphogluconate dehydrogenase apo-form                                   | Oxidoreductase                | -8.56         | 528.734625            | Met <sup>194</sup> , Ile <sup>197</sup> , Cys <sup>198</sup> , Tyr <sup>201</sup> , Ile <sup>234</sup> , Thr <sup>235</sup> , Asn <sup>237</sup> , Ile <sup>238</sup> , Leu <sup>239</sup> , Phe <sup>241</sup> , Leu <sup>249</sup> , Leu <sup>250</sup> , Ile <sup>253</sup> , Arg <sup>254</sup> , Lys <sup>255</sup> , Ser <sup>256</sup> , Arg <sup>287</sup>                                                                                     |
| 3R4O   | Heat shock protein 90                                                       | Chaperone                     | -8.56         | 530.52525             | Arg <sup>46</sup> , Glu <sup>47</sup> , Ser <sup>50</sup> , Asn <sup>51</sup> , Ser <sup>52</sup> , Asp <sup>54</sup> , Ala <sup>55</sup> , Lys <sup>58</sup> , Ile <sup>96</sup> , Met <sup>98</sup> , Asn <sup>106</sup> , Leu <sup>107</sup> , Lys <sup>112</sup> , Gly <sup>132</sup> , Gln <sup>133</sup> , Gly <sup>135</sup> , Thr <sup>184</sup>                                                                                               |
| 5AIU   | RNF4-ring domain, UBC13-UB (isopeptide crosslink)                           | Ligase/signaling protein      | -8.51         | 579.189               | Tyr <sup>143</sup> , Val <sup>147</sup> , Arg <sup>151</sup> , Leu <sup>152</sup> , Ile <sup>153</sup> , Ile <sup>192</sup> , Tyr <sup>193</sup> , Ile <sup>194</sup> , Gly <sup>195</sup> , Ser <sup>196</sup> , Val <sup>199</sup> , Ser <sup>200</sup> , Pro <sup>202</sup> , His <sup>225</sup> , Val <sup>226</sup> , Phe <sup>227</sup> , Thr <sup>244</sup>                                                                                     |
| 4KTV   | MAT enzymes: MATA2B                                                         | Transferase                   | -8.46         | 630.1889375           | Asp <sup>51</sup> , Ala <sup>52</sup> , Lys <sup>53</sup> , Gln <sup>135</sup> , Asp <sup>286</sup> , Tyr <sup>287</sup> , Thr <sup>288</sup> , Val <sup>290</sup> , Tyr <sup>320</sup> , Ala <sup>321</sup> , Gly <sup>322</sup> , Gly <sup>323</sup> , Val <sup>324</sup> , Ser <sup>325</sup> , Arg <sup>356</sup> , Pro <sup>357</sup> , Gly <sup>358</sup> , Val <sup>361</sup> , Arg <sup>362</sup> , Lys <sup>367</sup>                         |
| 5HEX   | Human hexokinase 2                                                          | Transferase                   | -8.43         | 658.4594375           | Asp <sup>84</sup> , Arg <sup>91</sup> , Ser <sup>155</sup> , Phe <sup>156</sup> , Asp <sup>209</sup> , Ile <sup>229</sup> , Gly <sup>231</sup> , Thr <sup>232</sup> , Gly <sup>233</sup> , Ser <sup>234</sup> , Asn <sup>235</sup> , Asp <sup>413</sup> , Gly <sup>414</sup> , Ser <sup>415</sup> , Lys <sup>418</sup> , Lys <sup>419</sup> , Glu <sup>446</sup> , Asp <sup>447</sup> , Gly <sup>448</sup> , Ser <sup>449</sup>                        |
| 3OHM   | Activated G alpha Q                                                         | Signaling protein             | -8.42         | 673.0668125           | Ile <sup>91</sup> , Met <sup>94</sup> , Asp <sup>95</sup> , Lys <sup>98</sup> , Ile <sup>99</sup> , Pro <sup>100</sup> , Tyr <sup>101</sup> , Lys <sup>102</sup> , Tyr <sup>103</sup> , Glu <sup>104</sup> , Lys <sup>107</sup> , Ala <sup>110</sup> , Gln <sup>111</sup> , Arg <sup>114</sup>                                                                                                                                                         |
| 6DK3   | Human mitochondrial serine hydroxymethyltransferase 2                       | Transferase                   | -8.42         | 678.770875            | Gln <sup>133</sup> , Trp <sup>134</sup> , Arg <sup>238</sup> , Cys <sup>241</sup> , Asp <sup>242</sup> , Lys <sup>245</sup> , Ala <sup>246</sup> , His <sup>247</sup> , Leu <sup>248</sup> , Phe <sup>268</sup> , Lys <sup>269</sup> , Asp <sup>272</sup> , Arg <sup>293</sup> , Val <sup>296</sup> , Lys <sup>297</sup> , Ala <sup>298</sup> , Tyr <sup>309</sup>                                                                                     |
| 4IAO   | The PDE5A1 catalytic domain                                                 | Hydrolase                     | -8.41         | 684.5233125           | Gln <sup>552</sup> , Thr <sup>557</sup> , Asp <sup>558</sup> , Phe <sup>559</sup> , Ser <sup>560</sup> , Lys <sup>630</sup> , Ala <sup>631</sup> , Thr <sup>769</sup> , Lys <sup>770</sup> , Pro <sup>771</sup> , Phe <sup>840</sup> , Pro <sup>841</sup> , Leu <sup>842</sup> , Asp <sup>844</sup> , Gly <sup>845</sup> , Lys <sup>848</sup>                                                                                                          |
| 5HZJ   | Intersectin1 containing wildtype LOV2 domain                                | Signaling protein             | -8.38         | 717.64975             | Glu <sup>1275</sup> , Lys <sup>1276</sup> , Ala <sup>1279</sup> , Val <sup>1283</sup> , Asn <sup>1284</sup> , Lys <sup>1286</sup> , Glu <sup>1287</sup> , Arg <sup>1474</sup> , Gln <sup>1580</sup> , Ala <sup>1581</sup> , His <sup>1582</sup> , Val <sup>1583</sup> , Gln <sup>1584</sup> , Cys <sup>1585</sup> , Glu <sup>1586</sup> , Gln <sup>1591</sup> , Val <sup>1593</sup> , Asn <sup>1653</sup> , Gln <sup>1655</sup>                        |
| 2CZK   | Human myo-inositol mono-phosphatase 2 (impa2)                               | Hydrolase                     | -8.34         | 775.5878125           | Thr <sup>55</sup> , Asp <sup>38</sup> , His <sup>59</sup> , Glu <sup>62</sup> , Glu <sup>81</sup> , Asp <sup>101</sup> , Ile <sup>103</sup> , Asp <sup>104</sup> , Gly <sup>105</sup> , Thr <sup>106</sup> , Cys <sup>107</sup> , Glu <sup>173</sup> , Gly <sup>175</sup> , Pro <sup>176</sup> , Ser <sup>207</sup> , Gln <sup>224</sup> , Gly <sup>226</sup> , Leu <sup>227</sup> , His <sup>228</sup> , Trp <sup>230</sup> , Asp <sup>231</sup>      |
| 4IRG   | The ETS transcription factor ERG                                            | DNA binding protein           | -8.32         | 795.47425             | Gly <sup>292</sup> , Gln <sup>293</sup> , Ile <sup>294</sup> , Gln <sup>295</sup> , Trp <sup>294</sup> , Arg <sup>337</sup> , Lys <sup>338</sup> , Ser <sup>339</sup> , Lys <sup>340</sup> , Pro <sup>341</sup> , Met <sup>343</sup> , Lys <sup>347</sup> , Leu <sup>348</sup> , Arg <sup>350</sup> , Ala <sup>351</sup> , Tyr <sup>354</sup>                                                                                                          |
| 1HF0   | DNA-binding domain of OCT-1                                                 | Transcription                 | -8.29         | 841.0376875           | Arg <sup>102</sup> , Lys <sup>103</sup> , Lys <sup>104</sup> , Arg <sup>105</sup> , Thr <sup>106</sup> , Arg <sup>113</sup> , Glu <sup>117</sup> , Val <sup>144</sup> , Val <sup>147</sup> , Trp <sup>148</sup> , Asn <sup>151</sup> , Arg <sup>152</sup> , Gln <sup>154</sup> , Lys <sup>155</sup> , Arg <sup>158</sup>                                                                                                                               |
| 2VSY   | The receptor protein tyrosine phosphatase mu ectodomain                     | Hydrolase                     | -8.23         | 921.2934375           | Gln <sup>402</sup> , Val <sup>403</sup> , Gly <sup>404</sup> , Ser <sup>430</sup> , Pro <sup>431</sup> , Tyr <sup>432</sup> , Thr <sup>433</sup> , Asn <sup>434</sup> , Glu <sup>485</sup> , Pro <sup>486</sup> , Thr <sup>487</sup> , Gln <sup>488</sup> , Thr <sup>489</sup> , Tyr <sup>490</sup> , Gly <sup>491</sup> , Val <sup>492</sup> , Ile <sup>493</sup>                                                                                     |
| 3R6I   | AKR1C3                                                                      | Oxidoreductase                | -8.21         | 967.5095625           | Gln <sup>6</sup> , Cys <sup>7</sup> , His <sup>14</sup> , Phe <sup>15</sup> , Pro <sup>17</sup> , Leu <sup>19</sup> , Gly <sup>45</sup> , Phe <sup>46</sup> , Arg <sup>47</sup> , Glu <sup>77</sup> , Asp <sup>78</sup> , Ile <sup>79</sup> , Phe <sup>80</sup> , Tyr <sup>110</sup> , Asp <sup>112</sup> , Lys <sup>161</sup> , Val <sup>281</sup> , Phe <sup>284</sup>                                                                               |
| 5POQ   | BRD1 in complex with N10974A                                                | Gene regulation               | -8.18         | 1010.912375           | Phe <sup>99</sup> , Asp <sup>100</sup> , Ile <sup>103</sup> , Arg <sup>124</sup> , Asp <sup>125</sup> , Gly <sup>127</sup> , Gly <sup>128</sup> , Leu <sup>131</sup> , Arg <sup>132</sup> , Arg <sup>135</sup> , Arg <sup>136</sup> , Asp <sup>139</sup>                                                                                                                                                                                               |
| 2CF9   | Recombinant human thrombin                                                  | Hydrolase/hydrolase inhibitor | -8.11         | 1130.035625           | Cys <sup>122</sup> , Leu <sup>123</sup> , Asp <sup>125</sup> , Glu <sup>127</sup> , Thr <sup>128</sup> , Ser <sup>129</sup> , b, Ser <sup>203</sup> , Phe <sup>204</sup> , a, Asn <sup>204</sup> , b, Arg <sup>206</sup> , Tyr <sup>208</sup> , Lys <sup>235</sup>                                                                                                                                                                                     |
| 3DOF   | Complex of ARL2 and BART                                                    | Signaling protein/hydrolase   | -8.05         | 1254.69675            | Lys <sup>9</sup> , Gln <sup>12</sup> , Lys <sup>13</sup> , Glu <sup>14</sup> , Phe <sup>81</sup> , Glu <sup>82</sup> , Ser <sup>83</sup> , Thr <sup>84</sup> , Asp <sup>85</sup> , Gly <sup>113</sup> , Arg <sup>114</sup> , Leu <sup>115</sup> , Ala <sup>116</sup> , Gly <sup>117</sup> , Ala <sup>118</sup> , Arg <sup>179</sup> , Ile <sup>180</sup> , Ala <sup>183</sup> , Asp <sup>184</sup> , His <sup>187</sup>                                |
| 5U7Z   | Human acid ceramidase (ASAH1, aCDase)                                       | Hydrolase                     | -8.05         | 1267.467375           | Tyr <sup>59</sup> , Val <sup>77</sup> , Lys <sup>81</sup> , Gly <sup>91</sup> , Met <sup>94</sup> , Gln <sup>95</sup> , Asp <sup>98</sup> , Glu <sup>99</sup> , Lys <sup>117</sup> , Ala <sup>120</sup> , Ala <sup>121</sup> , Asp <sup>124</sup> , Ile <sup>125</sup> , Pro <sup>126</sup> , Leu <sup>127</sup> , Glu <sup>129</sup>                                                                                                                  |
| 3BYI   | Human rho GTPASE activating protein 15 (arhgap15)                           | Signaling protein             | -8.03         | 1302.161875           | Ile <sup>379</sup> , Lys <sup>380</sup> , Lys <sup>381</sup> , Gln <sup>382</sup> , Asp <sup>383</sup> , Asn <sup>384</sup> , Arg <sup>387</sup> , Thr <sup>427</sup> , Gln <sup>428</sup> , Gln <sup>457</sup> , Glu <sup>460</sup> , Leu <sup>461</sup> , Ser <sup>464</sup> , Glu <sup>465</sup>                                                                                                                                                    |

| PDB ID | Target                                                                                     | Classification              | Energy kcal/m | Dissoc. constant [nM] | Contacting receptor residues                                                                                                                                                                                                                                                                                                                                                                                                      |
|--------|--------------------------------------------------------------------------------------------|-----------------------------|---------------|-----------------------|-----------------------------------------------------------------------------------------------------------------------------------------------------------------------------------------------------------------------------------------------------------------------------------------------------------------------------------------------------------------------------------------------------------------------------------|
| 5D1M   | UBCH5B                                                                                     | Ligase                      | -7.96         | 1475.392875           | Phe <sup>62</sup> , Lys <sup>63</sup> , Pro <sup>64</sup> , Pro <sup>65</sup> , Lys <sup>66</sup> , Val <sup>67</sup> , Ala <sup>68</sup> , Ser <sup>83</sup> , Ile <sup>84</sup> , Leu <sup>86</sup> , Leu <sup>89</sup> , Arg <sup>90</sup> , Ser <sup>91</sup> , Gln <sup>92</sup> , Trp <sup>93</sup>                                                                                                                         |
| 5L6D   | The human METTL3-METTL14 complex                                                           | Transferase                 | -7.95         | 1500.506125           | Asp <sup>395</sup> , Pro <sup>396</sup> , Pro <sup>397</sup> , Trp <sup>398</sup> , Ile <sup>400</sup> , Pro <sup>405</sup> , Tyr <sup>406</sup> , Thr <sup>408</sup> , Thr <sup>433</sup> , Lys <sup>459</sup> , Ile <sup>467</sup> , Leu <sup>476</sup> , Asn <sup>477</sup> , His <sup>478</sup> , Glu <sup>481</sup> , Val <sup>507</sup> , Thr <sup>510</sup> , Ser <sup>511</sup> , Lys <sup>513</sup> , Phe <sup>534</sup> |
| 6PAX   | Human PAX-6 paired domain-DNA complex                                                      | Gene regulation             | -7.94         | 1513.222625           | Asn <sup>6</sup> , Gln <sup>7</sup> , Leu <sup>8</sup> , Phe <sup>12</sup> , Val <sup>13</sup> , Asn <sup>14</sup> , Gly <sup>15</sup> , Arg <sup>16</sup> , Pro <sup>17</sup> , Leu <sup>18</sup> , Arg <sup>23</sup> , Ser <sup>46</sup> , Cys <sup>49</sup> , Lys <sup>52</sup> , Ile <sup>53</sup> , Arg <sup>56</sup> , Pro <sup>65</sup> , Arg <sup>66</sup> , Ile <sup>68</sup>                                            |
| 2J8B   | Human CD59                                                                                 | Lipid binding protein       | -7.93         | 1536.3845             | Phe <sup>42</sup> , Cys <sup>45</sup> , Asn <sup>46</sup> , Phe <sup>47</sup> , Leu <sup>59</sup> , Thr <sup>60</sup> , Tyr <sup>61</sup> , Tyr <sup>62</sup> , Cys <sup>63</sup> , Gln <sup>74</sup> , Leu <sup>75</sup> , Glu <sup>76</sup> , Asn <sup>77</sup>                                                                                                                                                                 |
| 5W45   | APOBEC3H                                                                                   | DNA binding protein         | -7.91         | 1594.505875           | Arg <sup>10</sup> , Leu <sup>11</sup> , Asn <sup>14</sup> , Lys <sup>16</sup> , Arg <sup>17</sup> , Arg <sup>18</sup> , Leu <sup>19</sup> , Arg <sup>20</sup> , Arg <sup>110</sup> , Phe <sup>157</sup> , Asn <sup>158</sup> , Lys <sup>161</sup> , Met <sup>162</sup> , Glu <sup>165</sup>                                                                                                                                       |
| 3WO2   | Human interleukin-18                                                                       | Immune system               | -7.9          | 1613.45625            | Asn <sup>14</sup> , Leu <sup>15</sup> , Asn <sup>16</sup> , Cys <sup>127</sup> , Lys <sup>129</sup> , Glu <sup>130</sup> , Arg <sup>131</sup> , Phe <sup>134</sup> , Lys <sup>139</sup> , Asp <sup>142</sup> , Glu <sup>143</sup> , Asp <sup>146</sup> , Arg <sup>147</sup> , Ser <sup>148</sup>                                                                                                                                  |
| 1CWF   | Human cyclophilin A                                                                        | Isomerase/immunosuppressant | -7.83         | 1812.73725            | Leu <sup>39</sup> , Thr <sup>41</sup> , Gly <sup>42</sup> , Gly <sup>45</sup> , Phe <sup>46</sup> , Gly <sup>47</sup> , Tyr <sup>48</sup> , Lys <sup>49</sup> , Gly <sup>50</sup> , Phe <sup>67</sup> , Thr <sup>68</sup> , Arg <sup>69</sup> , His <sup>70</sup> , Lys <sup>76</sup> , Cys <sup>161</sup>                                                                                                                        |
| 5F6D   | UBC9 (K48A/K49A/E54A)                                                                      | Ligase                      | -7.75         | 2078.302              | Lys <sup>65</sup> , Ser <sup>71</sup> , Pro <sup>72</sup> , Lys <sup>74</sup> , Tyr <sup>87</sup> , Pro <sup>88</sup> , Ser <sup>89</sup> , Thr <sup>91</sup> , Val <sup>92</sup> , Cys <sup>93</sup> , Leu <sup>94</sup> , Ser <sup>95</sup> , Leu <sup>97</sup> , Glu <sup>98</sup> , Glu <sup>99</sup> , Lys <sup>101</sup> , Ala <sup>129</sup>                                                                               |
| 4A7U   | Human I113T SOD1                                                                           | Oxidoreductase              | -7.75         | 2103.00225            | Val <sup>5</sup> , Cys <sup>6</sup> , Val <sup>7</sup> , Lys <sup>9</sup> , Gly <sup>51</sup> , Asp <sup>52</sup> , Asn <sup>53</sup> , Thr <sup>54</sup> , Cys <sup>146</sup> , Gly <sup>147</sup> , Val <sup>148</sup> , Ile <sup>149</sup> , Gly <sup>150</sup>                                                                                                                                                                |
| 4MXV   | Lymphotoxin alpha                                                                          | Cytokine/immune system      | -7.71         | 2219.709              | His <sup>32</sup> , Arg <sup>51</sup> , Phe <sup>53</sup> , Phe <sup>74</sup> , Tyr <sup>76</sup> , Gln <sup>78</sup> , Tyr <sup>134</sup> , His <sup>135</sup> , Gly <sup>136</sup> , Phe <sup>165</sup> , Phe <sup>169</sup>                                                                                                                                                                                                    |
| 5M3D   | Tuning of CD81LEL (space group p31)                                                        | Cell adhesion               | -7.71         | 2219.709              | Asp <sup>117</sup> , Ala <sup>120</sup> , Lys <sup>121</sup> , Lys <sup>124</sup> , Gln <sup>125</sup> , Asp <sup>128</sup> , Leu <sup>131</sup> , Gln <sup>132</sup> , Ser <sup>159</sup> , Ser <sup>160</sup> , Thr <sup>163</sup> , Asp <sup>189</sup> , His <sup>191</sup> , Gln <sup>192</sup> , Asp <sup>195</sup>                                                                                                          |
| 2IYB   | Complex between the 3rd LIM domain of TES and the evh1 domain of MENA                      | Metal-binding               | -7.71         | 2246.08975            | Glu <sup>3</sup> , His <sup>40</sup> , Asn <sup>43</sup> , Asn <sup>44</sup> , Thr <sup>45</sup> , Phe <sup>46</sup> , Arg <sup>47</sup> , Ala <sup>63</sup> , Ile <sup>64</sup> , Pro <sup>65</sup> , Lys <sup>66</sup> , Val <sup>110</sup> , Leu <sup>111</sup> , Ser <sup>113</sup>                                                                                                                                           |
| 5OKF   | Human 14-3-3 sigma with the hspb6 phosphopeptide                                           | Signaling protein           | -7.68         | 2354.78575            | Glu <sup>17</sup> , Tyr <sup>19</sup> , Glu <sup>20</sup> , Lys <sup>49</sup> , Asn <sup>50</sup> , Val <sup>51</sup> , Gly <sup>53</sup> , Gly <sup>54</sup> , Val <sup>55</sup> , Arg <sup>56</sup> , Ala <sup>57</sup> , Arg <sup>237</sup> , Arg <sup>238</sup> , Ala <sup>239</sup> , Ser <sup>240</sup> , Pro <sup>242</sup>                                                                                                |
| 3ZR0   | Human MTH1                                                                                 | Hydrolase                   | -7.62         | 2614.55625            | Asp <sup>109</sup> , Gln <sup>110</sup> , Ile <sup>111</sup> , Pro <sup>112</sup> , Phe <sup>113</sup> , Lys <sup>114</sup> , Asp <sup>115</sup> , Met <sup>116</sup> , Pro <sup>118</sup> , Ser <sup>121</sup> , Tyr <sup>122</sup>                                                                                                                                                                                              |
| 1QE6   | Interleukin-8                                                                              | Immune system               | -7.55         | 2902.9835             | Leu <sup>25</sup> , Val <sup>27</sup> , Glu <sup>29</sup> , Ser <sup>30</sup> , Asn <sup>36</sup> , Thr <sup>37</sup> , Ile <sup>39</sup> , Pro <sup>53</sup> , Lys <sup>54</sup> , Gln <sup>59</sup> , Val <sup>62</sup> , Glu <sup>63</sup> , Leu <sup>66</sup>                                                                                                                                                                 |
| 1Z3U   | Angiotensin-2 receptor binding domain                                                      | Signaling protein           | -7.51         | 3116.24075            | Thr <sup>364</sup> , Asn <sup>365</sup> , Arg <sup>368</sup> , His <sup>389</sup> , Tyr <sup>391</sup> , Leu <sup>392</sup> , Ser <sup>393</sup> , Ser <sup>394</sup> , Leu <sup>397</sup> , Arg <sup>400</sup> , His <sup>402</sup> , Lys <sup>404</sup>                                                                                                                                                                         |
| 4X1L   | Mutation-induced destabilization of profilin 1 in ALS                                      | Protein binding             | -7.48         | 3289.1775             | Tyr <sup>25</sup> , Lys <sup>26</sup> , Asp <sup>27</sup> , Gly <sup>49</sup> , Val <sup>52</sup> , Gly <sup>53</sup> , Asp <sup>81</sup> , Phe <sup>84</sup> , Lys <sup>105</sup> , Thr <sup>106</sup> , Asp <sup>107</sup> , Lys <sup>108</sup>                                                                                                                                                                                 |
| 5H0V   | H88A mutated human transthyretin                                                           | Transport protein           | -7.36         | 4061.753              | Pro <sup>11</sup> , Thr <sup>60</sup> , Glu <sup>61</sup> , Glu <sup>62</sup> , Phe <sup>64</sup> , Val <sup>65</sup> , Asp <sup>99</sup> , Gly <sup>101</sup> , Pro <sup>102</sup> , Arg <sup>103</sup> , Arg <sup>104</sup> , Tyr <sup>105</sup>                                                                                                                                                                                |
| 5U2P   | Citrate synthase                                                                           | Transferase                 | -7.34         | 4194.1185             | Arg <sup>52</sup> , Gly <sup>56</sup> , Lys <sup>57</sup> , Thr <sup>58</sup> , Val <sup>59</sup> , Val <sup>60</sup> , Gly <sup>61</sup> , Gln <sup>62</sup> , Ile <sup>63</sup> , Lys <sup>76</sup> , Gly <sup>77</sup> , Leu <sup>78</sup> , Val <sup>79</sup> , Phe <sup>444</sup> , Pro <sup>445</sup>                                                                                                                       |
| 1JT3   | Human acidic fibroblast growth factor                                                      | Hormone/growth factor       | -7.32         | 4294.4035             | Asn <sup>18</sup> , Lys <sup>112</sup> , Lys <sup>113</sup> , Asn <sup>114</sup> , Lys <sup>118</sup> , Pro <sup>121</sup> , Arg <sup>122</sup> , His <sup>124</sup> , Gln <sup>127</sup> , Lys <sup>128</sup> , Ala <sup>129</sup>                                                                                                                                                                                               |
| 4Y5O   | CCM2 HDD in complex with MEKK3 NPB1                                                        | Transferase                 | -7.28         | 4633.277              | Tyr <sup>325</sup> , Gly <sup>328</sup> , Ala <sup>329</sup> , Ser <sup>330</sup> , Ile <sup>331</sup> , Pro <sup>358</sup> , Glu <sup>359</sup> , Lys <sup>360</sup> , Asp <sup>361</sup> , His <sup>364</sup>                                                                                                                                                                                                                   |
| 5VZ3   | Growth factor                                                                              | Signaling protein           | -7.19         | 5348.0335             | Asp <sup>5</sup> , Pro <sup>11</sup> , Gly <sup>12</sup> , Arg <sup>16</sup> , Leu <sup>17</sup> , Arg <sup>53</sup> , Ala <sup>54</sup> , Lys <sup>107</sup> , Asp <sup>108</sup> , Cys <sup>109</sup> , His <sup>110</sup>                                                                                                                                                                                                      |
| 3H91   | Human chromobox homolog 2 (CBX2)                                                           | Transcription               | -7.19         | 5375.1815             | Glu <sup>9</sup> , Gln <sup>10</sup> , Val <sup>11</sup> , Phe <sup>12</sup> , Arg <sup>23</sup> , Trp <sup>33</sup> , Asn <sup>41</sup> , Ser <sup>42</sup> , Trp <sup>43</sup> , Glu <sup>44</sup> , Pro <sup>45</sup> , Glu <sup>47</sup> , Asn <sup>48</sup> , Leu <sup>50</sup>                                                                                                                                              |
| 5N7E   | DBL-homology domain of BCR-ABL                                                             | Signaling protein           | -7.18         | 5448.2525             | Lys <sup>8</sup> , Leu <sup>9</sup> , Glu <sup>10</sup> , Val <sup>11</sup> , Asp <sup>68</sup> , Ile <sup>89</sup> , Ile <sup>91</sup> , Asn <sup>92</sup> , Tyr <sup>93</sup> , Arg <sup>94</sup>                                                                                                                                                                                                                               |
| 5FUG   | A human YL1-H2A.Z-H2B complex                                                              | DNA binding protein         | -7.13         | 5948.0375             | Ile <sup>32</sup> , Leu <sup>36</sup> , Arg <sup>39</sup> , Thr <sup>40</sup> , Thr <sup>41</sup> , Gly <sup>44</sup> , Arg <sup>45</sup> , Val <sup>46</sup> , Ala <sup>50</sup> , Tyr <sup>53</sup> , Ser <sup>54</sup> , Ile <sup>57</sup> , Leu <sup>58</sup>                                                                                                                                                                 |
| 2X1X   | Structure of VEGF-C in complex with domains 2 and 3 of VEGFR2 in a tetragonal crystal form | Hormone/signaling protein   | -7.06         | 6660.171              | Arg <sup>161</sup> , Cys <sup>162</sup> , Gly <sup>163</sup> , Gly <sup>164</sup> , Cys <sup>165</sup> , Cys <sup>166</sup> , Glu <sup>169</sup> , Leu <sup>171</sup> , Gln <sup>172</sup> , Cys <sup>173</sup> , Met <sup>174</sup> , Asn <sup>175</sup> , His <sup>206</sup>                                                                                                                                                    |
| 3KLT   | A vimentin fragment                                                                        | Structural protein          | -6.94         | 8169.2                | Asp <sup>297</sup> , Glu <sup>300</sup> , Ala <sup>301</sup> , Arg <sup>304</sup> , Asn <sup>305</sup> , Asp <sup>307</sup> , Ala <sup>308</sup> , Gln <sup>311</sup>                                                                                                                                                                                                                                                             |
| 1BL1   | PTH receptor N-terminus fragment                                                           | Hormone receptor            | -6.84         | 9671.203              | Glu <sup>2</sup> , Ala <sup>3</sup> , Phe <sup>6</sup> , Leu <sup>7</sup> , Asn <sup>9</sup> , Glu <sup>10</sup> , Arg <sup>12</sup> , Glu <sup>13</sup> , Val <sup>16</sup> , Ile <sup>23</sup> , Val <sup>26</sup>                                                                                                                                                                                                              |
