# Supplementary material for: Effectiveness of Natural Antioxidants against SARS-CoV-2? Insights from the In-Silico World
Source: MDPI journal article supplement (doi:10.3390/antibiotics10081011), 2021-08-20
Supplement: s1 [file s1]

**Table S 1 Ligands docked to the SARS-CoV-2 proteins; binding energies, dissociation constants and active sites**

| Sr. | Ligands                                                                                             | PubChem ID | Proteins                            | Binding energy | Dissociation Constant | Active site residues                                                                                                                                                                                                                                                                                                                                                                    |
|-----|-----------------------------------------------------------------------------------------------------|------------|-------------------------------------|----------------|-----------------------|-----------------------------------------------------------------------------------------------------------------------------------------------------------------------------------------------------------------------------------------------------------------------------------------------------------------------------------------------------------------------------------------|
|     |                                                                                                     |            |                                     | (kcal/mol)     | ( $\mu$ M)            |                                                                                                                                                                                                                                                                                                                                                                                         |
| 1   | 4-Caffeoylquinic acid                                                                               | 124136972  | Main Protease (MPro)                | -7.96          | 1.45                  | Thr <sup>25</sup> , Thr <sup>26</sup> , Leu <sup>27</sup> , His <sup>41</sup> , Cys <sup>44</sup> , Met <sup>49</sup> , Asn <sup>142</sup> , Gly <sup>143</sup> , Cys <sup>145</sup> , His <sup>164</sup> , Met <sup>165</sup> , Glu <sup>166</sup> , Pro <sup>168</sup> , Arg <sup>188</sup> , Gln <sup>189</sup> , Thr <sup>190</sup> , Gln <sup>192</sup>                            |
|     |                                                                                                     |            | Papain like protease (PLPro)        | -8.15          | 1.07                  | Arg <sup>166</sup> , Ser <sup>170</sup> , Val <sup>202</sup> , Glu <sup>203</sup> , Met <sup>206</sup> , Tyr <sup>207</sup> , Met <sup>208</sup> , Gly <sup>209</sup> , Ile <sup>222</sup> , Pro <sup>223</sup>                                                                                                                                                                         |
|     |                                                                                                     |            | RNA-dependent RNA polymerase (RdRP) | -7.02          | 7.1                   | Tyr <sup>149</sup> , Ala <sup>176</sup> , Asn <sup>177</sup> , Leu <sup>178</sup> , Gly <sup>179</sup> , Glu <sup>180</sup> , Arg <sup>181</sup> , Gln <sup>184</sup> , Asn <sup>213</sup> , Arg <sup>249</sup> , Thr <sup>252</sup> , Leu <sup>261</sup>                                                                                                                               |
|     |                                                                                                     |            | Helicase                            | -8.3           | 0.826                 | Pro <sup>175</sup> , Asn <sup>177</sup> , Asn <sup>179</sup> , Tyr <sup>180</sup> , Pro <sup>406</sup> , Ala <sup>407</sup> , Pro <sup>408</sup> , Arg <sup>409</sup> , Thr <sup>410</sup> , Leu <sup>412</sup> , Thr <sup>416</sup> , Leu <sup>417</sup> , Glu <sup>418</sup> , Pro <sup>419</sup> , Phe <sup>422</sup> , Asn <sup>557</sup> , Asn <sup>559</sup> , Arg <sup>560</sup> |
|     |                                                                                                     |            | E-channel proteins                  | -7.43          | 3.55                  | Ile <sup>46</sup> , Leu <sup>51</sup> , Pro <sup>54</sup> , Phe <sup>56</sup> , Tyr <sup>57</sup>                                                                                                                                                                                                                                                                                       |
|     |                                                                                                     |            | Spike Open Protein                  | -7.35          | 4.1                   | Gly <sup>908</sup> , Ile <sup>909</sup> , Gly <sup>910</sup> , Gln <sup>1036</sup> , Ser <sup>1037</sup> , Lys <sup>1038</sup> , Arg <sup>1039</sup> , Val <sup>1040</sup> , Asp <sup>1041</sup> , Tyr <sup>1047</sup> , His <sup>1048</sup> , Glu <sup>1092</sup> , Gly <sup>1093</sup> , Arg <sup>1107</sup> , Asn <sup>1108</sup>                                                    |
|     |                                                                                                     |            | Spike Close Protein                 | -7.09          | 6.32                  | Phe <sup>329</sup> , Pro <sup>330</sup> , Asn <sup>331</sup> , Ile <sup>332</sup> , Thr <sup>333</sup> , Leu <sup>335</sup> , Val <sup>362</sup> , Asp <sup>364</sup> , Gly <sup>526</sup> , Pro <sup>527</sup> , Lys <sup>528</sup> , Lys <sup>529</sup> , Ser <sup>530</sup> , Gln <sup>580</sup>                                                                                     |
| 2   | (1S,4R,5R)-3-[3-(3,4-Dihydroxyphenyl)prop-2-enoyloxy]-1,4,5-trihydroxycyclohexane-1-carboxylic acid | 60074140   | Main Protease (MPro)                | -8.01          | 1.36                  | Arg <sup>131</sup> , Lys <sup>137</sup> , Asp <sup>197</sup> , Thr <sup>198</sup> , Thr <sup>199</sup> , Tyr <sup>239</sup> , Leu <sup>271</sup> , Leu <sup>272</sup> , Gly <sup>275</sup> , Met <sup>276</sup> , Ala <sup>285</sup> , Leu <sup>286</sup> , Leu <sup>287</sup> , Asp <sup>289</sup> , Glu <sup>290</sup>                                                                |
|     |                                                                                                     |            | Papain like protease (PLPro)        | -9.23          | 0.17                  | Arg <sup>166</sup> , Ser <sup>170</sup> , Val <sup>202</sup> , Glu <sup>203</sup> , Met <sup>206</sup> , Tyr <sup>207</sup> , Met <sup>208</sup>                                                                                                                                                                                                                                        |
|     |                                                                                                     |            | RNA-dependent RNA polymerase (RdRP) | -8.29          | 0.85                  | Val <sup>588</sup> , Ile <sup>589</sup> , Gly <sup>590</sup> , Thr <sup>591</sup> , Ser <sup>592</sup> , Lys <sup>593</sup> , Phe <sup>594</sup> , Leu <sup>758</sup> , Gln <sup>815</sup> , Pro <sup>830</sup> , Tyr <sup>831</sup> , Pro <sup>832</sup> , Asp <sup>865</sup> , Pro <sup>868</sup> , Trp <sup>916</sup>                                                                |
|     |                                                                                                     |            | Helicase                            | -7.95          | 1.495                 | Pro <sup>175</sup> , Asn <sup>177</sup> , Asn <sup>179</sup> , Tyr <sup>180</sup> , Leu <sup>405</sup> , Pro <sup>406</sup> , Pro <sup>408</sup> , Arg <sup>409</sup> , Thr <sup>410</sup> , Leu <sup>412</sup> , Thr <sup>413</sup> , Leu <sup>417</sup> , Pro <sup>419</sup> , Phe <sup>422</sup> , Asn <sup>557</sup> , Asn <sup>559</sup> , Arg <sup>560</sup>                      |
|     |                                                                                                     |            | E-channel proteins                  | -7.69          | 2.33                  | No binding site was found                                                                                                                                                                                                                                                                                                                                                               |
|     |                                                                                                     |            | Spike Open Protein                  | -7.21          | 5.15                  | Met <sup>740</sup> , Tyr <sup>741</sup> , Ile <sup>742</sup> , Gly <sup>744</sup> , Asn <sup>856</sup> , Val <sup>963</sup> , Lys <sup>964</sup> , Leu <sup>966</sup> , Ser <sup>967</sup> , Ser <sup>975</sup> , Val <sup>976</sup> , Leu <sup>977</sup> , Asn <sup>978</sup> , Arg <sup>1000</sup>                                                                                    |

| Sr. | Ligands                      | PubChem ID | Proteins                            | Binding energy | Dissociation Constant | Active site residues                                                                                                                                                                                                                                                                                                                                                                                                      |
|-----|------------------------------|------------|-------------------------------------|----------------|-----------------------|---------------------------------------------------------------------------------------------------------------------------------------------------------------------------------------------------------------------------------------------------------------------------------------------------------------------------------------------------------------------------------------------------------------------------|
|     |                              |            |                                     | (kcal/mol)     | ( $\mu$ M)            |                                                                                                                                                                                                                                                                                                                                                                                                                           |
|     |                              |            | Spike Close Protein                 | -6.84          | 9.7                   | Arg <sup>355</sup> , Pro <sup>426</sup> , Asp <sup>428</sup> , Phe <sup>429</sup> , Thr <sup>430</sup> , Lys <sup>462</sup> , Pro <sup>463</sup> , Phe <sup>464</sup> , Glu <sup>465</sup> , Ser <sup>514</sup> , Phe <sup>515</sup> , Glu <sup>516</sup> , Leu <sup>517</sup>                                                                                                                                            |
| 3   | 1,2,4-Cyclopentanetrione     | 534963     | Main Protease (MPro)                | -6.25          | 26.05                 | Thr <sup>25</sup> , Thr <sup>26</sup> , Leu <sup>27</sup> , His <sup>41</sup> , Cys <sup>44</sup> , Thr <sup>45</sup> , Ser <sup>46</sup> , Met <sup>49</sup> , Asn <sup>142</sup> , Gly <sup>143</sup> , Cys <sup>145</sup> , His <sup>164</sup> , Met <sup>165</sup> , Glu <sup>166</sup> , Arg <sup>188</sup> , Gln <sup>189</sup>                                                                                     |
|     |                              |            | Papain like protease (PLPro)        | -8.2           | 0.97                  | Phe <sup>69</sup> , His <sup>73</sup> , Thr <sup>74</sup> , Thr <sup>75</sup> , Asp <sup>76</sup> , Phe <sup>79</sup> , Arg <sup>82</sup> , Tyr <sup>154</sup> , Tyr <sup>171</sup> , Gln <sup>174</sup> , His <sup>175</sup>                                                                                                                                                                                             |
|     |                              |            | RNA-dependent RNA polymerase (RdRP) | -6.02          | 38.86                 | Ala <sup>46</sup> , Lys <sup>47</sup> , Tyr <sup>129</sup> , His <sup>133</sup> , Asp <sup>135</sup> , Asn <sup>705</sup> , Ala <sup>706</sup> , Ser <sup>709</sup> , Thr <sup>710</sup> , Ala <sup>771</sup> , Ser <sup>772</sup> , Gln <sup>773</sup> , Gly <sup>774</sup> , Ser <sup>778</sup> , Lys <sup>780</sup> , Asn <sup>781</sup> , Ser <sup>784</sup>                                                          |
|     |                              |            | Helicase                            | -6.68          | 12.67                 | Ala <sup>4</sup> , Cys <sup>5</sup> , Val <sup>6</sup> , Arg <sup>15</sup> , Arg <sup>21</sup> , Arg <sup>22</sup> , Pro <sup>23</sup> , Phe <sup>24</sup> , Arg <sup>129</sup> , Leu <sup>132</sup> , Phe <sup>133</sup> , Glu <sup>136</sup> , Pro <sup>234</sup> , Leu <sup>235</sup> , Ser <sup>236</sup>                                                                                                             |
|     |                              |            | E-channel proteins                  | -6.72          | 11.8                  | Leu <sup>19</sup> , Ala <sup>22</sup> , Phe <sup>23</sup>                                                                                                                                                                                                                                                                                                                                                                 |
|     |                              |            | Spike Open Protein                  | -5.87          | 50.05                 | Ile <sup>788</sup> , Tyr <sup>789</sup> , Lys <sup>790</sup> , Thr <sup>791</sup> , Pro <sup>792</sup> , Pro <sup>793</sup> , Lys <sup>795</sup> , Leu <sup>806</sup> , Pro <sup>807</sup> , Pro <sup>809</sup> , Lys <sup>814</sup> , Gln <sup>872</sup> , Ser <sup>875</sup> , Ala <sup>879</sup>                                                                                                                       |
|     |                              |            | Spike Close Protein                 | -7.31          | 4.41                  | Glu <sup>96</sup> , Ile <sup>101</sup> , Arg <sup>102</sup> , Gly <sup>103</sup> , Trp <sup>104</sup> , Ile <sup>119</sup> , Asn <sup>121</sup> , Val <sup>126</sup> , Ile <sup>128</sup> , Tyr <sup>170</sup> , Ser <sup>172</sup> , Arg <sup>190</sup> , Phe <sup>192</sup> , Phe <sup>194</sup> , Ile <sup>203</sup> , Ser <sup>205</sup> , His <sup>207</sup> , Leu <sup>226</sup> , Val <sup>227</sup>               |
| 4   | 11,14,17-Eicosatrienoic acid | 5312529    | Main Protease (MPro)                | -4.53          | 477.24                | Thr <sup>25</sup> , Thr <sup>26</sup> , Leu <sup>27</sup> , His <sup>41</sup> , Cys <sup>44</sup> , Thr <sup>45</sup> , Ser <sup>46</sup> , Met <sup>49</sup> , Asn <sup>142</sup> , Gly <sup>143</sup> , Cys <sup>145</sup> , His <sup>164</sup> , Met <sup>165</sup> , Glu <sup>166</sup> , Leu <sup>167</sup> , Pro <sup>168</sup> , Arg <sup>188</sup> , Gln <sup>189</sup> , Thr <sup>190</sup> , Gln <sup>192</sup> |
|     |                              |            | Papain like protease (PLPro)        | -6.74          | 11.45                 | Arg <sup>166</sup> , Tyr <sup>268</sup>                                                                                                                                                                                                                                                                                                                                                                                   |
|     |                              |            | RNA-dependent RNA polymerase (RdRP) | -4.79          | 308.76                | Phe <sup>35</sup> , Asp <sup>36</sup> , Ile <sup>37</sup> , Tyr <sup>38</sup> , Asn <sup>39</sup> , Val <sup>42</sup> , Phe <sup>48</sup> , Lys <sup>50</sup> , Lys <sup>73</sup> , Thr <sup>206</sup> , Asp <sup>208</sup> , Asn <sup>209</sup> , Tyr <sup>217</sup> , Asp <sup>218</sup> , Asp <sup>221</sup> , Asn <sup>713</sup>                                                                                      |
|     |                              |            | Helicase                            | -4.99          | 220.3                 | Ala <sup>4</sup> , Val <sup>6</sup> , Arg <sup>15</sup> , Arg <sup>21</sup> , Arg <sup>22</sup> , Pro <sup>23</sup> , Phe <sup>24</sup> , Arg <sup>129</sup> , Leu <sup>132</sup> , Phe <sup>133</sup> , Glu <sup>136</sup> , Pro <sup>234</sup> , Leu <sup>235</sup>                                                                                                                                                     |
|     |                              |            | E-channel proteins                  | -5.74          | 61.81                 | Leu <sup>19</sup> , Ala <sup>22</sup> , Phe <sup>23</sup>                                                                                                                                                                                                                                                                                                                                                                 |

| Sr. | Ligands                  | PubChem ID | Proteins                            | Binding energy | Dissociation Constant | Active site residues                                                                                                                                                                                                                                                                                                                                                                                         |
|-----|--------------------------|------------|-------------------------------------|----------------|-----------------------|--------------------------------------------------------------------------------------------------------------------------------------------------------------------------------------------------------------------------------------------------------------------------------------------------------------------------------------------------------------------------------------------------------------|
|     |                          |            |                                     | (kcal/mol)     | ( $\mu$ M)            |                                                                                                                                                                                                                                                                                                                                                                                                              |
|     |                          |            | Spike Open Protein                  | -3.95          | 1280.98               | Pro <sup>1079</sup> , Phe <sup>1089</sup> , Pro <sup>1090</sup> , Arg <sup>1107</sup> , Phe <sup>1121</sup> , Ser <sup>1123</sup> , Gly <sup>1124</sup> , Asn <sup>1125</sup> , Val <sup>1128</sup> , Val <sup>1129</sup> , Ile <sup>1130</sup>                                                                                                                                                              |
|     |                          |            | Spike Close Protein                 | -4.95          | 236.08                | Trp <sup>104</sup> , Ile <sup>119</sup> , Asn <sup>121</sup> , Val <sup>126</sup> , Ile <sup>128</sup> , Phe <sup>168</sup> , Tyr <sup>170</sup> , Ser <sup>172</sup> , Phe <sup>192</sup> , Phe <sup>194</sup> , Ile <sup>203</sup> , Leu <sup>226</sup> , Val <sup>227</sup> , Asp <sup>228</sup> , Leu <sup>229</sup>                                                                                     |
| 5   | 11-Eicosenoic acid       | 5282768    | Main Protease (MPro)                | -4.11          | 979.48                | Trp <sup>218</sup> , Phe <sup>219</sup> , Leu <sup>220</sup> , Asn <sup>221</sup> , Arg <sup>222</sup> , Phe <sup>223</sup> , Ser <sup>267</sup> , Glu <sup>270</sup> , Leu <sup>271</sup> , Asn <sup>274</sup> , Gly <sup>275</sup> , Met <sup>276</sup> , Asn <sup>277</sup> , Arg <sup>279</sup>                                                                                                          |
|     |                          |            | Papain like protease (PLPro)        | -6.42          | 19.65                 | Asp <sup>164</sup> , Arg <sup>166</sup> , Met <sup>208</sup> , Ser <sup>245</sup> , Ala <sup>246</sup> , Pro <sup>247</sup> , Pro <sup>248</sup> , Tyr <sup>268</sup> , Tyr <sup>273</sup> , Thr <sup>301</sup>                                                                                                                                                                                              |
|     |                          |            | RNA-dependent RNA polymerase (RdRP) | -4.11          | 969.61                | Phe <sup>441</sup> , Lys <sup>545</sup> , Tyr <sup>546</sup> , Ala <sup>547</sup> , Ile <sup>548</sup> , Arg <sup>836</sup> , Ala <sup>840</sup> , Phe <sup>843</sup> , Val <sup>844</sup> , Asp <sup>845</sup> , Arg <sup>858</sup> , Leu <sup>862</sup>                                                                                                                                                    |
|     |                          |            | Helicase                            | -4.76          | 322.608               | Asn <sup>179</sup> , Pro <sup>406</sup> , Ala <sup>407</sup> , Pro <sup>408</sup> , Arg <sup>409</sup> , Thr <sup>410</sup> , Leu <sup>412</sup> , Gly <sup>415</sup> , Thr <sup>416</sup> , Leu <sup>417</sup> , Phe <sup>422</sup> , His <sup>554</sup> , Asn <sup>557</sup> , Asn <sup>559</sup> , Arg <sup>560</sup>                                                                                     |
|     |                          |            | E-channel proteins                  | -6.07          | 35.41                 | No binding site was found                                                                                                                                                                                                                                                                                                                                                                                    |
|     |                          |            | Spike Open Protein                  | -4.01          | 1155.66               | Ile <sup>119</sup> , Val <sup>126</sup> , Ile <sup>128</sup> , Phe <sup>168</sup> , Tyr <sup>170</sup> , Ser <sup>172</sup> , Ile <sup>203</sup> , Leu <sup>226</sup> , Val <sup>227</sup> , Asp <sup>228</sup> , Leu <sup>229</sup> , Pro <sup>230</sup>                                                                                                                                                    |
|     |                          |            | Spike Close Protein                 | -6.21          | 28.2                  | Glu <sup>96</sup> , Asn <sup>99</sup> , Ile <sup>101</sup> , Arg <sup>102</sup> , Trp <sup>104</sup> , Ile <sup>119</sup> , Asn <sup>121</sup> , Val <sup>126</sup> , Ile <sup>128</sup> , Phe <sup>168</sup> , Tyr <sup>170</sup> , Ser <sup>172</sup> , Arg <sup>190</sup> , Phe <sup>192</sup> , Phe <sup>194</sup> , Ile <sup>203</sup> , Leu <sup>226</sup> , Val <sup>227</sup> , Leu <sup>229</sup>   |
| 6   | 13-16-Docosadienoic acid | 5282807    | Main Protease (MPro)                | -4.08          | 1026.88               | Trp <sup>218</sup> , Phe <sup>219</sup> , Leu <sup>220</sup> , Asn <sup>221</sup> , Phe <sup>223</sup> , Glu <sup>270</sup> , Leu <sup>271</sup> , Asn <sup>274</sup> , Gly <sup>275</sup> , Asn <sup>277</sup> , Arg <sup>279</sup>                                                                                                                                                                         |
|     |                          |            | Papain like protease (PLPro)        | -6.26          | 25.61                 | Lys <sup>157</sup> , Glu <sup>161</sup> , Leu <sup>162</sup> , Gly <sup>163</sup> , Asp <sup>164</sup> , Val <sup>165</sup> , Pro <sup>247</sup> , Pro <sup>248</sup> , Tyr <sup>264</sup> , Asn <sup>267</sup> , Tyr <sup>268</sup> , Gln <sup>269</sup> , Tyr <sup>273</sup>                                                                                                                               |
|     |                          |            | RNA-dependent RNA polymerase (RdRP) | -5.03          | 204.88                | Ser <sup>255</sup> , Tyr <sup>265</sup> , Ile <sup>266</sup> , Lys <sup>267</sup> , Trp <sup>268</sup> , Leu <sup>270</sup> , Val <sup>320</sup> , Phe <sup>321</sup> , Pro <sup>322</sup> , Pro <sup>323</sup> , Thr <sup>324</sup> , Leu <sup>387</sup> , Leu <sup>388</sup> , Leu <sup>389</sup> , Asp <sup>390</sup> , Thr <sup>394</sup> , Cys <sup>395</sup> , Phe <sup>396</sup> , Ser <sup>397</sup> |

| Sr. | Ligands                        | PubChem ID | Proteins                            | Binding energy | Dissociation Constant | Active site residues                                                                                                                                                                                                                                                                                                                                                                    |
|-----|--------------------------------|------------|-------------------------------------|----------------|-----------------------|-----------------------------------------------------------------------------------------------------------------------------------------------------------------------------------------------------------------------------------------------------------------------------------------------------------------------------------------------------------------------------------------|
|     |                                |            |                                     | (kcal/mol)     | ( $\mu$ M)            |                                                                                                                                                                                                                                                                                                                                                                                         |
|     |                                |            | Helicase                            | -4.34          | 655.449               | Asp <sup>328</sup> , Lys <sup>329</sup> , Cys <sup>330</sup> , Ser <sup>331</sup> , Arg <sup>332</sup> , Lys <sup>345</sup> , Phe <sup>346</sup> , Lys <sup>347</sup> , Asn <sup>349</sup> , Ser <sup>350</sup> , Thr <sup>351</sup> , Leu <sup>352</sup> , Glu <sup>353</sup> , Gln <sup>354</sup>                                                                                     |
|     |                                |            | E-channel proteins                  | -6.28          | 24.84                 | No binding site was found                                                                                                                                                                                                                                                                                                                                                               |
|     |                                |            | Spike Open Protein                  | -3.64          | 2161.61               | Met <sup>740</sup> , Tyr <sup>741</sup> , Ile <sup>742</sup> , Cys <sup>743</sup> , Gly <sup>744</sup> , Asn <sup>856</sup> , Val <sup>963</sup> , Lys <sup>964</sup> , Leu <sup>966</sup> , Ser <sup>967</sup> , Ser <sup>975</sup> , Val <sup>976</sup> , Leu <sup>977</sup> , Asn <sup>978</sup> , Arg <sup>1000</sup>                                                               |
|     |                                |            | Spike Close Protein                 | -4.5           | 500.33                | Leu <sup>335</sup> , Cys <sup>336</sup> , Phe <sup>338</sup> , Gly <sup>339</sup> , Phe <sup>342</sup> , Asn <sup>343</sup> , Val <sup>362</sup> , Ala <sup>363</sup> , Asp <sup>364</sup> , Val <sup>367</sup> , Leu <sup>368</sup> , Ser <sup>371</sup> , Ser <sup>373</sup> , Phe <sup>374</sup> , Trp <sup>436</sup> , Arg <sup>509</sup>                                           |
| 7   | 18, $\beta$ -Glycyrrhetic acid | 404621453  | Main Protease (MPro)                | -9.19          | 0.35                  | Lys <sup>5</sup> , Arg <sup>131</sup> , Lys <sup>137</sup> , Asp <sup>197</sup> , Thr <sup>199</sup> , Tyr <sup>237</sup> , Tyr <sup>239</sup> , Leu <sup>272</sup> , Leu <sup>286</sup> , Leu <sup>287</sup> , Glu <sup>288</sup> , Asp <sup>289</sup> , Glu <sup>290</sup>                                                                                                            |
|     |                                |            | Papain like protease (PLPro)        | -8.71          | 0.41                  | No binding site was found                                                                                                                                                                                                                                                                                                                                                               |
|     |                                |            | RNA-dependent RNA polymerase (RdRP) | -8.14          | 1.07                  | Arg <sup>249</sup> , Thr <sup>252</sup> , Ser <sup>255</sup> , Tyr <sup>265</sup> , Thr <sup>319</sup> , Val <sup>320</sup> , Phe <sup>321</sup> , Pro <sup>323</sup> , Arg <sup>349</sup> , Thr <sup>394</sup> , Cys <sup>395</sup> , Phe <sup>396</sup> , Tyr <sup>456</sup> , Arg <sup>457</sup> , Asn <sup>459</sup> , Leu <sup>460</sup> , Pro <sup>461</sup> , Pro <sup>677</sup> |
|     |                                |            | Helicase                            | -9.91          | 0.054                 | Ala <sup>4</sup> , Val <sup>6</sup> , Arg <sup>15</sup> , Arg <sup>21</sup> , Arg <sup>22</sup> , Pro <sup>23</sup> , Phe <sup>24</sup> , Arg <sup>129</sup> , Leu <sup>132</sup> , Phe <sup>133</sup> , Glu <sup>136</sup> , Pro <sup>234</sup> , Leu <sup>235</sup> , Ser <sup>236</sup>                                                                                              |
|     |                                |            | E-channel proteins                  | -9.72          | 0.07                  | No binding site was found                                                                                                                                                                                                                                                                                                                                                               |
|     |                                |            | Spike Open Protein                  | -7.99          | 1.38                  | His <sup>1101</sup> , Trp <sup>1102</sup> , Phe <sup>1103</sup> , Ile <sup>1114</sup> , Ile <sup>1115</sup> , Asn <sup>1135</sup> , Thr <sup>1136</sup> , Val <sup>1137</sup> , Tyr <sup>1138</sup> , Asp <sup>1139</sup> , Gln <sup>1142</sup> , Pro <sup>1143</sup>                                                                                                                   |
|     |                                |            | Spike Close Protein                 | -8.08          | 1.2                   | Tyr <sup>38</sup> , Asp <sup>40</sup> , Lys <sup>41</sup> , Val <sup>42</sup> , Phe <sup>43</sup> , Arg <sup>44</sup> , Glu <sup>224</sup> , Pro <sup>225</sup> , Tyr <sup>279</sup> , Gly <sup>283</sup>                                                                                                                                                                               |
|     |                                |            | Main Protease (MPro)                | -4.55          | 462.17                | Arg <sup>4</sup> , Lys <sup>5</sup> , Met <sup>6</sup> , Ala <sup>7</sup> , Phe <sup>8</sup> , Pro <sup>9</sup> , Gln <sup>127</sup> , Phe <sup>291</sup> , Asp <sup>295</sup> , Arg <sup>298</sup> , Gln <sup>299</sup>                                                                                                                                                                |
|     |                                |            | Papain like protease (PLPro)        | -4.86          | 276.21                | No binding site was found                                                                                                                                                                                                                                                                                                                                                               |
|     |                                |            | RNA-dependent RNA polymerase (RdRP) | -4.39          | 607.51                | Lys <sup>593</sup> , Phe <sup>594</sup> , Gln <sup>815</sup> , Pro <sup>830</sup> , Tyr <sup>831</sup> , Pro <sup>832</sup> , Ile <sup>864</sup> , Asp <sup>865</sup> , Pro <sup>868</sup> , Trp <sup>916</sup>                                                                                                                                                                         |

| Sr. | Ligands                        | PubChem ID | Proteins                            | Binding energy | Dissociation Constant | Active site residues                                                                                                                                                                                                                                                                                                                                                                        |
|-----|--------------------------------|------------|-------------------------------------|----------------|-----------------------|---------------------------------------------------------------------------------------------------------------------------------------------------------------------------------------------------------------------------------------------------------------------------------------------------------------------------------------------------------------------------------------------|
|     |                                |            |                                     | (kcal/mol)     | ( $\mu$ M)            |                                                                                                                                                                                                                                                                                                                                                                                             |
| 8   | 1-Octen-3-ol                   | 18827      | Helicase                            | -4.47          | 525.43                | Gln <sup>281</sup> , Asp <sup>401</sup> , Pro <sup>402</sup> , Ala <sup>403</sup> , Pro <sup>419</sup> , Lys <sup>430</sup> , Pro <sup>434</sup> , Phe <sup>437</sup> , Tyr <sup>457</sup> , Asp <sup>458</sup> , Asn <sup>459</sup> , Asn <sup>559</sup>                                                                                                                                   |
|     |                                |            | E-channel proteins                  | -4.5           | 503.72                | No binding site was found                                                                                                                                                                                                                                                                                                                                                                   |
|     |                                |            | Spike Open Protein                  | -4.16          | 900.21                | Val <sup>729</sup> , Ser <sup>730</sup> , Met <sup>731</sup> , Thr <sup>732</sup> , Lys <sup>733</sup> , Gln <sup>774</sup> , Thr <sup>778</sup> , Phe <sup>782</sup> , Leu <sup>861</sup> , Pro <sup>862</sup> , Pro <sup>863</sup> , Leu <sup>865</sup> , Asp <sup>867</sup> , Ile <sup>870</sup> , Ala <sup>1056</sup> , Pro <sup>1057</sup> , His <sup>1058</sup> , Gly <sup>1059</sup> |
|     |                                |            | Spike Close Protein                 | -4.15          | 906.31                | Met <sup>740</sup> , Tyr <sup>741</sup> , Ile <sup>742</sup> , Cys <sup>743</sup> , Gly <sup>744</sup> , Asn <sup>856</sup> , Leu <sup>966</sup> , Ser <sup>975</sup> , Val <sup>976</sup> , Leu <sup>977</sup> , Asn <sup>978</sup> , Arg <sup>1000</sup>                                                                                                                                  |
| 9   | 2,5-dihydroxyterephthalic acid | 69131      | Main Protease (MPro)                | -7.22          | 5.09                  | Met <sup>6</sup> , Ala <sup>7</sup> , Phe <sup>8</sup> , Pro <sup>9</sup> , Gln <sup>127</sup> , Phe <sup>291</sup> , Asp <sup>295</sup> , Arg <sup>298</sup> , Gln <sup>299</sup> , Gly <sup>302</sup> , Val <sup>303</sup>                                                                                                                                                                |
|     |                                |            | Papain like protease (PLPro)        | -7.22          | 5.14                  | Thr <sup>74</sup> , Thr <sup>75</sup> , Asp <sup>76</sup> , Tyr <sup>154</sup> , Asn <sup>156</sup> , Tyr <sup>171</sup> , Gln <sup>174</sup> , His <sup>175</sup>                                                                                                                                                                                                                          |
|     |                                |            | RNA-dependent RNA polymerase (RdRP) | -6.49          | 17.58                 | Gly <sup>616</sup> , Trp <sup>617</sup> , Asp <sup>618</sup> , Asp <sup>761</sup> , Ala <sup>762</sup> , Lys <sup>798</sup> , Cys <sup>799</sup> , Trp <sup>800</sup> , Glu <sup>811</sup> , Phe <sup>812</sup> , Cys <sup>813</sup> , Ser <sup>814</sup>                                                                                                                                   |
|     |                                |            | Helicase                            | -6.3           | 24.305                | Val <sup>6</sup> , Arg <sup>21</sup> , Arg <sup>22</sup> , Pro <sup>23</sup> , Phe <sup>24</sup> , Arg <sup>129</sup> , Leu <sup>132</sup> , Phe <sup>133</sup> , Glu <sup>136</sup> , Leu <sup>235</sup>                                                                                                                                                                                   |
|     |                                |            | E-channel proteins                  | -5.95          | 43.44                 | Leu <sup>51</sup> , Pro <sup>54</sup> , Phe <sup>56</sup> , Tyr <sup>57</sup>                                                                                                                                                                                                                                                                                                               |
|     |                                |            | Spike Open Protein                  | -6.53          | 16.29                 | Arg <sup>403</sup> , Tyr <sup>453</sup> , Ser <sup>494</sup> , Tyr <sup>495</sup> , Gly <sup>496</sup> , Phe <sup>497</sup> , Asn <sup>501</sup> , Tyr <sup>505</sup>                                                                                                                                                                                                                       |
|     |                                |            | Spike Close Protein                 | -6.37          | 21.42                 | Tyr <sup>38</sup> , Asp <sup>40</sup> , Lys <sup>41</sup> , Val <sup>42</sup> , Phe <sup>43</sup> , Arg <sup>44</sup> , Glu <sup>224</sup> , Pro <sup>225</sup> , Tyr <sup>279</sup> , Asn <sup>282</sup> , Gly <sup>283</sup> , Thr <sup>284</sup>                                                                                                                                         |
| 10  | 2-Hydroxy-5-sulfobenzoic acid  | 7322       | Main Protease (MPro)                | -6.44          | 19.03                 | Phe <sup>8</sup> , Val <sup>104</sup> , Ile <sup>106</sup> , Gln <sup>110</sup> , Thr <sup>111</sup> , Asn <sup>151</sup> , Asp <sup>153</sup> , Ser <sup>158</sup> , Thr <sup>292</sup> , Phe <sup>294</sup> , Asp <sup>295</sup> , Arg <sup>298</sup>                                                                                                                                     |
|     |                                |            | Papain like protease (PLPro)        | -7.05          | 6.76                  | Arg <sup>166</sup> , Ser <sup>170</sup> , Val <sup>202</sup> , Glu <sup>203</sup> , Met <sup>206</sup> , Tyr <sup>207</sup> , Met <sup>208</sup>                                                                                                                                                                                                                                            |
|     |                                |            | RNA-dependent RNA polymerase (RdRP) | -5.91          | 46.71                 | Ala <sup>383</sup> , Ser <sup>384</sup> , Gly <sup>385</sup> , Asn <sup>386</sup>                                                                                                                                                                                                                                                                                                           |
|     |                                |            | Helicase                            | -6.74          | 11.546                | Gln <sup>281</sup> , Asp <sup>401</sup> , Pro <sup>402</sup> , Ala <sup>403</sup> , Pro <sup>419</sup> , Met <sup>429</sup> , Lys <sup>430</sup> , Gly <sup>433</sup> , Pro <sup>434</sup> , Tyr <sup>457</sup> , Asp <sup>458</sup> , Asn <sup>459</sup>                                                                                                                                   |
|     |                                |            | E-channel proteins                  | -5.77          | 59.26                 | Pro <sup>54</sup> , Phe <sup>56</sup> , Tyr <sup>57</sup> , Ser <sup>60</sup>                                                                                                                                                                                                                                                                                                               |

| Sr. | Ligands                | PubChem ID | Proteins                            | Binding energy | Dissociation Constant | Active site residues                                                                                                                                                                                                                                                                                                         |
|-----|------------------------|------------|-------------------------------------|----------------|-----------------------|------------------------------------------------------------------------------------------------------------------------------------------------------------------------------------------------------------------------------------------------------------------------------------------------------------------------------|
|     |                        |            |                                     | (kcal/mol)     | ( $\mu$ M)            |                                                                                                                                                                                                                                                                                                                              |
|     |                        |            | Spike Open Protein                  | -5.08          | 189.89                | Ser <sup>704</sup> , Val <sup>705</sup> , Ala <sup>706</sup> , Tyr <sup>707</sup> , Ser <sup>708</sup> , Ser <sup>711</sup> , Ile <sup>712</sup> , Ala <sup>713</sup> , Asn <sup>1074</sup>                                                                                                                                  |
|     |                        |            | Spike Close Protein                 | -6.42          | 19.68                 | Met <sup>740</sup> , Tyr <sup>741</sup> , Ile <sup>742</sup> , Cys <sup>743</sup> , Gly <sup>744</sup> , Asp <sup>745</sup> , Phe <sup>855</sup> , Asn <sup>856</sup> , Leu <sup>966</sup> , Leu <sup>977</sup> , Asn <sup>978</sup> , Arg <sup>1000</sup>                                                                   |
| 11  | 2-Hydroxycinnamic acid | 637540     | Main Protease (MPro)                | -6.47          | 18.12                 | Phe <sup>3</sup> , Met <sup>6</sup> , Ala <sup>7</sup> , Phe <sup>8</sup> , Pro <sup>9</sup> , Gln <sup>127</sup> , Phe <sup>291</sup> , Asp <sup>295</sup> , Val <sup>296</sup> , Arg <sup>298</sup> , Gln <sup>299</sup> , Val <sup>303</sup> , Thr <sup>304</sup>                                                         |
|     |                        |            | Papain like protease (PLPro)        | -6.71          | 12.15                 | No binding site was found                                                                                                                                                                                                                                                                                                    |
|     |                        |            | RNA-dependent RNA polymerase (RdRP) | -6.15          | 30.84                 | Lys <sup>411</sup> , Pro <sup>412</sup> , Gly <sup>413</sup> , Asn <sup>414</sup> , Tyr <sup>546</sup> , Val <sup>844</sup> , Asp <sup>845</sup> , Asp <sup>846</sup> , cser <sup>15</sup> , cgl <sup>19</sup> , dmet <sup>87</sup>                                                                                          |
|     |                        |            | Helicase                            | -6.32          | 23.262                | Pro <sup>406</sup> , Ala <sup>407</sup> , Arg <sup>409</sup> , Leu <sup>412</sup> , Thr <sup>416</sup> , Leu <sup>417</sup> , Pro <sup>419</sup> , Phe <sup>422</sup> , Asn <sup>557</sup> , Asn <sup>559</sup> , Arg <sup>560</sup>                                                                                         |
|     |                        |            | E-channel proteins                  | -6.27          | 25.52                 | No binding site was found                                                                                                                                                                                                                                                                                                    |
|     |                        |            | Spike Open Protein                  | -5.96          | 42.71                 | Ser <sup>730</sup> , Met <sup>731</sup> , Thr <sup>732</sup> , Lys <sup>733</sup> , Gln <sup>774</sup> , Val <sup>860</sup> , Leu <sup>861</sup> , Pro <sup>862</sup> , Pro <sup>863</sup> , Asp <sup>867</sup> , Ile <sup>870</sup> , Ala <sup>1056</sup> , Pro <sup>1057</sup> , His <sup>1058</sup> , Gly <sup>1059</sup> |
|     |                        |            | Spike Close Protein                 | -6.26          | 25.78                 | Val <sup>382</sup> , Leu <sup>390</sup> , Cys <sup>391</sup> , Thr <sup>393</sup> , Leu <sup>517</sup> , Leu <sup>518</sup> , His <sup>519</sup> , Ala <sup>520</sup> , Ala <sup>522</sup> , Asn <sup>544</sup> , Gly <sup>545</sup> , Phe <sup>565</sup>                                                                    |
| 12  | 2R,3S-Catechin         | 9064       | Main Protease (MPro)                | -8.49          | 0.6                   | Met <sup>6</sup> , Ala <sup>7</sup> , Phe <sup>8</sup> , Pro <sup>9</sup> , Gln <sup>127</sup> , Asp <sup>295</sup> , Arg <sup>298</sup> , Gln <sup>299</sup> , Gly <sup>302</sup> , Val <sup>303</sup> , Thr <sup>304</sup>                                                                                                 |
|     |                        |            | Papain like protease (PLPro)        | -8.11          | 1.14                  | Arg <sup>166</sup> , Glu <sup>167</sup> , Ser <sup>170</sup> , Val <sup>202</sup> , Glu <sup>203</sup> , Met <sup>206</sup> , Tyr <sup>207</sup> , Met <sup>208</sup> , Lys <sup>232</sup>                                                                                                                                   |
|     |                        |            | RNA-dependent RNA polymerase (RdRP) | -7.25          | 4.84                  | Phe <sup>441</sup> , Lys <sup>545</sup> , Tyr <sup>546</sup> , Ala <sup>547</sup> , Ile <sup>548</sup> , Ser <sup>549</sup> , Arg <sup>555</sup> , Arg <sup>836</sup> , Ala <sup>840</sup> , Val <sup>844</sup> , Asp <sup>845</sup> , Arg <sup>858</sup> , Leu <sup>862</sup>                                               |
|     |                        |            | Helicase                            | -7.84          | 1.794                 | Pro <sup>406</sup> , Ala <sup>407</sup> , Pro <sup>408</sup> , Arg <sup>409</sup> , Leu <sup>412</sup> , Thr <sup>413</sup> , Lys <sup>414</sup> , Gly <sup>415</sup> , Thr <sup>416</sup> , Leu <sup>417</sup> , Phe <sup>422</sup> , His <sup>554</sup>                                                                    |
|     |                        |            | E-channel proteins                  | -6.78          | 10.79                 | Ala <sup>32</sup> , Ile <sup>33</sup> , Ala <sup>36</sup>                                                                                                                                                                                                                                                                    |

| Sr. | Ligands                   | PubChem ID | Proteins                            | Binding energy | Dissociation Constant | Active site residues                                                                                                                                                                                                                                                                                                      |
|-----|---------------------------|------------|-------------------------------------|----------------|-----------------------|---------------------------------------------------------------------------------------------------------------------------------------------------------------------------------------------------------------------------------------------------------------------------------------------------------------------------|
|     |                           |            |                                     | (kcal/mol)     | ( $\mu$ M)            |                                                                                                                                                                                                                                                                                                                           |
|     |                           |            | Spike Open Protein                  | -6.89          | 8.87                  | Met <sup>740</sup> , Tyr <sup>741</sup> , Ile <sup>742</sup> , Cys <sup>743</sup> , Gly <sup>744</sup> , Asn <sup>856</sup> , Val <sup>963</sup> , Lys <sup>964</sup> , Leu <sup>966</sup> , Ser <sup>967</sup> , Ser <sup>975</sup> , Val <sup>976</sup> , Leu <sup>977</sup> , Asn <sup>978</sup> , Arg <sup>1000</sup> |
|     |                           |            | Spike Close Protein                 | -6.95          | 8.02                  | Met <sup>740</sup> , Tyr <sup>741</sup> , Ile <sup>742</sup> , Cys <sup>743</sup> , Gly <sup>744</sup> , Asn <sup>856</sup> , Val <sup>963</sup> , Lys <sup>964</sup> , Leu <sup>966</sup> , Ser <sup>967</sup> , Ser <sup>975</sup> , Val <sup>976</sup> , Leu <sup>977</sup> , Asn <sup>978</sup> , Arg <sup>1000</sup> |
| 13  | 2S,3R-Catechin            | 73160      | Main Protease (MPro)                | -8.09          | 1.18                  | Met <sup>6</sup> , Ala <sup>7</sup> , Phe <sup>8</sup> , Pro <sup>9</sup> , Ser <sup>113</sup> , Gln <sup>127</sup> , Asp <sup>295</sup> , Arg <sup>298</sup> , Gln <sup>299</sup> , Gly <sup>302</sup> , Val <sup>303</sup> , Thr <sup>304</sup>                                                                         |
|     |                           |            | Papain like protease (PLPro)        | -9.26          | 0.16                  | Thr <sup>74</sup> , Thr <sup>75</sup> , Asp <sup>76</sup> , Tyr <sup>154</sup> , Tyr <sup>171</sup> , Gln <sup>174</sup> , His <sup>175</sup>                                                                                                                                                                             |
|     |                           |            | RNA-dependent RNA polymerase (RdRP) | -7.06          | 6.72                  | Lys <sup>593</sup> , Phe <sup>594</sup> , Cys <sup>813</sup> , Ser <sup>814</sup> , Gln <sup>815</sup> , Pro <sup>830</sup> , Tyr <sup>831</sup> , Pro <sup>832</sup> , Arg <sup>836</sup> , Asp <sup>865</sup> , Pro <sup>868</sup> , Trp <sup>916</sup>                                                                 |
|     |                           |            | Helicase                            | -7.54          | 2.972                 | Asn <sup>179</sup> , Pro <sup>406</sup> , Pro <sup>408</sup> , Arg <sup>409</sup> , Thr <sup>410</sup> , Leu <sup>412</sup> , Gly <sup>415</sup> , Thr <sup>416</sup> , Leu <sup>417</sup> , Pro <sup>419</sup> , Phe <sup>422</sup> , Asn <sup>557</sup> , Asn <sup>559</sup> , Arg <sup>560</sup>                       |
|     |                           |            | E-channel proteins                  | -7.74          | 2.11                  | Leu <sup>51</sup> , Pro <sup>54</sup> , Phe <sup>56</sup> , Tyr <sup>57</sup> , Ser <sup>60</sup> , Arg <sup>61</sup>                                                                                                                                                                                                     |
|     |                           |            | Spike Open Protein                  | -6.92          | 8.45                  | Met <sup>740</sup> , Tyr <sup>741</sup> , Ile <sup>742</sup> , Cys <sup>743</sup> , Gly <sup>744</sup> , Asn <sup>856</sup> , Val <sup>963</sup> , Leu <sup>966</sup> , Ser <sup>967</sup> , Ser <sup>975</sup> , Val <sup>976</sup> , Leu <sup>977</sup> , Asn <sup>978</sup> , Arg <sup>1000</sup>                      |
|     |                           |            | Spike Close Protein                 | -7.24          | 4.94                  | Met <sup>740</sup> , Tyr <sup>741</sup> , Ile <sup>742</sup> , Cys <sup>743</sup> , Gly <sup>744</sup> , Asn <sup>856</sup> , Val <sup>963</sup> , Leu <sup>966</sup> , Ser <sup>967</sup> , Ser <sup>975</sup> , Val <sup>976</sup> , Leu <sup>977</sup> , Asn <sup>978</sup> , Arg <sup>1000</sup>                      |
| 14  | 3,4-Dihydroxybenzoic acid | 72         | Main Protease (MPro)                | -5.94          | 44.4                  | Met <sup>6</sup> , Ala <sup>7</sup> , Phe <sup>8</sup> , Pro <sup>9</sup> , Ser <sup>113</sup> , Gln <sup>127</sup> , Asp <sup>295</sup> , Arg <sup>298</sup> , Gln <sup>299</sup> , Val <sup>303</sup> , Thr <sup>304</sup>                                                                                              |
|     |                           |            | Papain like protease (PLPro)        | -6.85          | 9.61                  | No binding site was found                                                                                                                                                                                                                                                                                                 |
|     |                           |            | RNA-dependent RNA polymerase (RdRP) | -6.13          | 32.22                 | Gly <sup>616</sup> , Trp <sup>617</sup> , Asp <sup>618</sup> , Asp <sup>761</sup> , Ala <sup>762</sup> , Val <sup>763</sup> , Lys <sup>798</sup> , Cys <sup>799</sup> , Trp <sup>800</sup> , Glu <sup>811</sup> , Phe <sup>812</sup> , Cys <sup>813</sup> , Ser <sup>814</sup>                                            |
|     |                           |            | Helicase                            | -6.65          | 13.35                 | Tyr <sup>120</sup> , Ala <sup>123</sup> , Asn <sup>124</sup> , Ala <sup>135</sup> , Leu <sup>138</sup> , Thr <sup>380</sup> , Asn <sup>381</sup> , Tyr <sup>382</sup> , Arg <sup>409</sup> , Leu <sup>417</sup> , Tyr <sup>421</sup> , Phe <sup>422</sup>                                                                 |
|     |                           |            | E-channel proteins                  | -5.47          | 98.32                 | Leu <sup>51</sup> , Pro <sup>54</sup> , Tyr <sup>57</sup>                                                                                                                                                                                                                                                                 |
|     |                           |            | Spike Open Protein                  | -5.8           | 55.76                 | Met <sup>740</sup> , Tyr <sup>741</sup> , Ile <sup>742</sup> , Cys <sup>743</sup> , Gly <sup>744</sup> , Leu <sup>966</sup> , Ser <sup>967</sup> , Ser <sup>975</sup> , Val <sup>976</sup> , Leu <sup>977</sup> , Asn <sup>978</sup> , Arg <sup>1000</sup>                                                                |

| Sr. | Ligands                   | PubChem ID | Proteins                            | Binding energy | Dissociation Constant | Active site residues                                                                                                                                                                                                                                                                                                                                                                                         |
|-----|---------------------------|------------|-------------------------------------|----------------|-----------------------|--------------------------------------------------------------------------------------------------------------------------------------------------------------------------------------------------------------------------------------------------------------------------------------------------------------------------------------------------------------------------------------------------------------|
|     |                           |            |                                     | (kcal/mol)     | ( $\mu$ M)            |                                                                                                                                                                                                                                                                                                                                                                                                              |
|     |                           |            | Spike Close Protein                 | -6.22          | 27.54                 | Tyr <sup>38</sup> , Asp <sup>40</sup> , Lys <sup>41</sup> , Val <sup>42</sup> , Phe <sup>43</sup> , Arg <sup>44</sup> , Glu <sup>224</sup> , Pro <sup>225</sup> , Asn <sup>282</sup> , Gly <sup>283</sup> , Thr <sup>284</sup>                                                                                                                                                                               |
| 15  | 3,4-Dimethoxybenzoic acid | 7121       | Main Protease (MPro)                | -6.29          | 24.43                 | Met <sup>6</sup> , Ala <sup>7</sup> , Phe <sup>8</sup> , Pro <sup>9</sup> , Thr <sup>111</sup> , Gln <sup>127</sup> , Phe <sup>291</sup> , Asp <sup>295</sup> , Arg <sup>298</sup> , Gln <sup>299</sup> , Gly <sup>302</sup> , Val <sup>303</sup>                                                                                                                                                            |
|     |                           |            | Papain like protease (PLPro)        | -6.06          | 36.02                 | Arg <sup>166</sup> , Ser <sup>170</sup> , Val <sup>202</sup> , Glu <sup>203</sup> , Met <sup>206</sup> , Tyr <sup>207</sup> , Met <sup>208</sup>                                                                                                                                                                                                                                                             |
|     |                           |            | RNA-dependent RNA polymerase (RdRP) | -5.35          | 120.8                 | Gly <sup>616</sup> , Trp <sup>617</sup> , Asp <sup>618</sup> , Asp <sup>761</sup> , Lys <sup>798</sup> , Cys <sup>799</sup> , Trp <sup>800</sup> , Glu <sup>811</sup> , Phe <sup>812</sup> , Cys <sup>813</sup> , Ser <sup>814</sup>                                                                                                                                                                         |
|     |                           |            | Helicase                            | -5.71          | 64.911                | Ala <sup>4</sup> , Cys <sup>5</sup> , Val <sup>6</sup> , Arg <sup>15</sup> , Arg <sup>21</sup> , Arg <sup>22</sup> , Pro <sup>23</sup> , Phe <sup>24</sup> , Arg <sup>129</sup> , Leu <sup>132</sup> , Phe <sup>133</sup> , Glu <sup>136</sup> , Leu <sup>235</sup>                                                                                                                                          |
|     |                           |            | E-channel proteins                  | -5.57          | 82.35                 | Leu <sup>28</sup> , Leu <sup>31</sup> , Ala <sup>32</sup> , Thr <sup>35</sup> , Cys <sup>40</sup>                                                                                                                                                                                                                                                                                                            |
|     |                           |            | Spike Open Protein                  | -5.25          | 141.33                | Met <sup>740</sup> , Tyr <sup>741</sup> , Gly <sup>744</sup> , Leu <sup>966</sup> , Ser <sup>967</sup> , Ser <sup>975</sup> , Val <sup>976</sup> , Leu <sup>977</sup> , Asn <sup>978</sup> , Arg <sup>1000</sup>                                                                                                                                                                                             |
|     |                           |            | Spike Close Protein                 | -5.44          | 103.25                | Leu <sup>335</sup> , Cys <sup>336</sup> , Pro <sup>337</sup> , Phe <sup>338</sup> , Gly <sup>339</sup> , Phe <sup>342</sup> , Asn <sup>343</sup> , Val <sup>362</sup> , Ala <sup>363</sup> , Asp <sup>364</sup> , Val <sup>367</sup> , Leu <sup>368</sup>                                                                                                                                                    |
| 16  | 3-Acetoxy-4,5-dihydroxy   | 129855414  | Main Protease (MPro)                | -6.99          | 7.58                  | Arg <sup>40</sup> , Pro <sup>52</sup> , Asn <sup>53</sup> , Tyr <sup>54</sup> , Glu <sup>55</sup> , Asp <sup>56</sup> , Met <sup>82</sup> , Asn <sup>84</sup> , Cys <sup>85</sup> , Thr <sup>175</sup> , Gly <sup>179</sup> , Asn <sup>180</sup> , Phe <sup>181</sup> , Phe <sup>185</sup> , Val <sup>186</sup> , Asp <sup>187</sup> , Arg <sup>188</sup>                                                    |
|     | -3-prenyldihydrostilbene  |            | Papain like protease (PLPro)        | -9             | 0.25                  | Lys <sup>157</sup> , Glu <sup>161</sup> , Leu <sup>162</sup> , Gly <sup>163</sup> , Asp <sup>164</sup> , Glu <sup>167</sup> , Pro <sup>248</sup> , Tyr <sup>264</sup> , Tyr <sup>268</sup> , Gln <sup>269</sup> , Tyr <sup>273</sup> , Thr <sup>301</sup>                                                                                                                                                    |
|     |                           |            | RNA-dependent RNA polymerase (RdRP) | -7.11          | 6.19                  | Arg <sup>33</sup> , Phe <sup>35</sup> , Ile <sup>37</sup> , Asn <sup>39</sup> , Val <sup>42</sup> , Phe <sup>48</sup> , Leu <sup>49</sup> , Lys <sup>50</sup> , Lys <sup>73</sup> , Thr <sup>123</sup> , Asp <sup>208</sup> , Asn <sup>209</sup> , Tyr <sup>217</sup> , Asp <sup>218</sup> , Asn <sup>713</sup>                                                                                              |
|     |                           |            | Helicase                            | -7.23          | 5.007                 | Pro <sup>175</sup> , Asn <sup>177</sup> , Asn <sup>179</sup> , Tyr <sup>180</sup> , Pro <sup>406</sup> , Ala <sup>407</sup> , Pro <sup>408</sup> , Arg <sup>409</sup> , Thr <sup>410</sup> , Leu <sup>412</sup> , Thr <sup>413</sup> , Gly <sup>415</sup> , Thr <sup>416</sup> , Leu <sup>417</sup> , Phe <sup>422</sup> , His <sup>554</sup> , Asn <sup>557</sup> , Asn <sup>559</sup> , Arg <sup>560</sup> |
|     |                           |            | E-channel proteins                  | -8.62          | 0.48                  | No binding site was found                                                                                                                                                                                                                                                                                                                                                                                    |
|     |                           |            | Spike Open Protein                  | -7.63          | 2.54                  | Ile <sup>105</sup> , Leu <sup>118</sup> , Ile <sup>119</sup> , Val <sup>120</sup> , Asn <sup>122</sup> , Val <sup>127</sup> , Ile <sup>128</sup> , Lys <sup>129</sup> , Phe <sup>133</sup> , Gln <sup>134</sup> , Phe <sup>135</sup> , Cys <sup>136</sup> , Pro <sup>139</sup> , Phe <sup>140</sup> , Leu <sup>141</sup> , Leu <sup>241</sup>                                                                |
|     |                           |            |                                     |                |                       |                                                                                                                                                                                                                                                                                                                                                                                                              |



| Sr. | Ligands                            | PubChem ID | Proteins                            | Binding energy | Dissociation Constant | Active site residues                                                                                                                                                                                                                                                                                                                          |
|-----|------------------------------------|------------|-------------------------------------|----------------|-----------------------|-----------------------------------------------------------------------------------------------------------------------------------------------------------------------------------------------------------------------------------------------------------------------------------------------------------------------------------------------|
|     |                                    |            |                                     | (kcal/mol)     | ( $\mu$ M)            |                                                                                                                                                                                                                                                                                                                                               |
|     |                                    |            | Spike Close Protein                 | -7.48          | 3.27                  | Tyr <sup>38</sup> , Asp <sup>40</sup> , Lys <sup>41</sup> , Val <sup>42</sup> , Phe <sup>43</sup> , Arg <sup>44</sup> , Glu <sup>224</sup> , Pro <sup>225</sup> , Tyr <sup>279</sup> , Asn <sup>282</sup> , Gly <sup>283</sup> , Thr <sup>284</sup>                                                                                           |
| 17  | 3-Deazaneplanocin A                | 73087      | Main Protease (MPro)                | -6.46          | 18.46                 | Thr <sup>24</sup> , Thr <sup>25</sup> , Thr <sup>26</sup> , His <sup>41</sup> , Cys <sup>44</sup> , Thr <sup>45</sup> , Ser <sup>46</sup> , Met <sup>49</sup> , His <sup>164</sup> , Met <sup>165</sup> , Glu <sup>166</sup> , Gln <sup>189</sup>                                                                                             |
|     |                                    |            | Papain like protease (PLPro)        | -7.62          | 2.61                  | Tyr <sup>268</sup>                                                                                                                                                                                                                                                                                                                            |
|     |                                    |            | RNA-dependent RNA polymerase (RdRP) | -6.43          | 19.32                 | Glu <sup>136</sup> , Gly <sup>137</sup> , Asn <sup>138</sup> , Cys <sup>139</sup> , Asp <sup>140</sup> , Lys <sup>143</sup> , Phe <sup>157</sup> , Asn <sup>158</sup> , Lys <sup>159</sup> , Lys <sup>160</sup> , Asp <sup>161</sup> , Trp <sup>162</sup> , Tyr <sup>163</sup>                                                                |
|     |                                    |            | Helicase                            | -6.91          | 8.608                 | Pro <sup>406</sup> , Arg <sup>409</sup> , Leu <sup>412</sup> , Thr <sup>416</sup> , Leu <sup>417</sup> , Glu <sup>418</sup> , Pro <sup>419</sup> , Phe <sup>422</sup> , His <sup>554</sup> , Asn <sup>557</sup> , Asn <sup>559</sup> , Arg <sup>560</sup>                                                                                     |
|     |                                    |            | E-channel proteins                  | -5.78          | 57.77                 | Val <sup>29</sup> , Ala <sup>32</sup> , Ile <sup>33</sup> , Ala <sup>36</sup> , Arg <sup>38</sup>                                                                                                                                                                                                                                             |
|     |                                    |            | Spike Open Protein                  | -5.78          | 58.46                 | Tyr <sup>396</sup> , Pro <sup>426</sup> , Asp <sup>428</sup> , Phe <sup>429</sup> , Thr <sup>430</sup> , Phe <sup>464</sup> , Ser <sup>514</sup> , Phe <sup>515</sup> , Glu <sup>516</sup> , Leu <sup>517</sup> , Leu <sup>518</sup>                                                                                                          |
|     |                                    |            | Spike Close Protein                 | -6.27          | 25.4                  | Phe <sup>329</sup> , Pro <sup>330</sup> , Asn <sup>331</sup> , Ile <sup>332</sup> , Thr <sup>333</sup> , Val <sup>362</sup> , Gly <sup>526</sup> , Pro <sup>527</sup> , Lys <sup>528</sup> , Lys <sup>529</sup> , Ser <sup>530</sup>                                                                                                          |
| 18  | 4,7,10,13,16-Docosapentaenoic acid | 5282848    | Main Protease (MPro)                | -4.86          | 272.04                | Trp <sup>218</sup> , Phe <sup>219</sup> , Leu <sup>220</sup> , Asn <sup>221</sup> , Phe <sup>223</sup> , Ser <sup>267</sup> , Glu <sup>270</sup> , Leu <sup>271</sup> , Asn <sup>274</sup> , Gly <sup>275</sup> , Met <sup>276</sup> , Asn <sup>277</sup> , Arg <sup>279</sup>                                                                |
|     |                                    |            | Papain like protease (PLPro)        | -7.77          | 2.03                  | Lys <sup>157</sup> , Leu <sup>162</sup> , Gly <sup>163</sup> , Asp <sup>164</sup> , Arg <sup>166</sup> , Met <sup>208</sup> , Pro <sup>247</sup> , Pro <sup>248</sup> , Tyr <sup>264</sup> , Tyr <sup>268</sup> , Gln <sup>269</sup> , Tyr <sup>273</sup> , Thr <sup>301</sup>                                                                |
|     |                                    |            | RNA-dependent RNA polymerase (RdRP) | -5.11          | 180.21                | Lys <sup>426</sup> , Gly <sup>427</sup> , Phe <sup>428</sup> , Phe <sup>429</sup> , Lys <sup>430</sup> , Ser <sup>433</sup> , Ser <sup>434</sup> , Val <sup>435</sup> , Glu <sup>876</sup> , Asp <sup>879</sup> , His <sup>882</sup> , Leu <sup>883</sup> , Gln <sup>886</sup>                                                                |
|     |                                    |            | Helicase                            | -5.85          | 51.772                | Asn <sup>179</sup> , Pro <sup>406</sup> , Ala <sup>407</sup> , Pro <sup>408</sup> , Arg <sup>409</sup> , Thr <sup>410</sup> , Leu <sup>412</sup> , Gly <sup>415</sup> , Thr <sup>416</sup> , Leu <sup>417</sup> , Phe <sup>422</sup> , Asp <sup>534</sup> , His <sup>554</sup> , Asn <sup>557</sup> , Asn <sup>559</sup> , Arg <sup>560</sup> |
|     |                                    |            | E-channel proteins                  | -7.04          | 6.89                  | No binding site was found                                                                                                                                                                                                                                                                                                                     |
|     |                                    |            | Spike Open Protein                  | -5.12          | 177.5                 | Trp <sup>104</sup> , Ile <sup>119</sup> , Asn <sup>121</sup> , Val <sup>126</sup> , Ile <sup>128</sup> , Tyr <sup>170</sup> , Ser <sup>172</sup> , Arg <sup>190</sup> , Phe <sup>192</sup> , Phe <sup>194</sup> , Ile <sup>203</sup> , Ser <sup>205</sup> , His <sup>207</sup> , Leu <sup>226</sup> , Val <sup>227</sup>                      |

| Sr. | Ligands                | PubChem ID | Proteins                            | Binding energy | Dissociation Constant | Active site residues                                                                                                                                                                                                                                                                                                                           |
|-----|------------------------|------------|-------------------------------------|----------------|-----------------------|------------------------------------------------------------------------------------------------------------------------------------------------------------------------------------------------------------------------------------------------------------------------------------------------------------------------------------------------|
|     |                        |            |                                     | (kcal/mol)     | ( $\mu$ M)            |                                                                                                                                                                                                                                                                                                                                                |
|     |                        |            | Spike Close Protein                 | -6.18          | 29.56                 | Trp <sup>104</sup> , Ile <sup>119</sup> , Asn <sup>121</sup> , Val <sup>126</sup> , Ile <sup>128</sup> , Phe <sup>168</sup> , Tyr <sup>170</sup> , Ser <sup>172</sup> , Arg <sup>190</sup> , Phe <sup>192</sup> , Phe <sup>194</sup> , Ile <sup>203</sup> , Leu <sup>226</sup> , Val <sup>227</sup> , Asp <sup>228</sup> , Leu <sup>229</sup>  |
| 19  | 4-Hydroxybenzoic acid  | 135        | Main Protease (MPro)                | -6.04          | 37.57                 | Met <sup>6</sup> , Ala <sup>7</sup> , Phe <sup>8</sup> , Pro <sup>9</sup> , Thr <sup>111</sup> , Gln <sup>127</sup> , Phe <sup>291</sup> , Asp <sup>295</sup> , Arg <sup>298</sup> , Gln <sup>299</sup> , Val <sup>303</sup>                                                                                                                   |
|     |                        |            | Papain like protease (PLPro)        | -6.06          | 36.08                 | His <sup>73</sup> , Thr <sup>74</sup> , Asp <sup>76</sup> , Phe <sup>79</sup> , Arg <sup>82</sup> , Ala <sup>153</sup> , Tyr <sup>154</sup> , Cys <sup>155</sup> , Asn <sup>156</sup> , His <sup>175</sup>                                                                                                                                     |
|     |                        |            | RNA-dependent RNA polymerase (RdRP) | -5.45          | 101.18                | Gly <sup>616</sup> , Trp <sup>617</sup> , Asp <sup>618</sup> , Asp <sup>761</sup> , Ala <sup>762</sup> , Lys <sup>798</sup> , Cys <sup>799</sup> , Trp <sup>800</sup> , Glu <sup>811</sup> , Phe <sup>812</sup> , Cys <sup>813</sup> , Ser <sup>814</sup>                                                                                      |
|     |                        |            | Helicase                            | -5.97          | 42.28                 | Tyr <sup>120</sup> , Ala <sup>123</sup> , Asn <sup>124</sup> , Ala <sup>135</sup> , Leu <sup>138</sup> , Thr <sup>380</sup> , Asn <sup>381</sup> , Tyr <sup>382</sup> , Arg <sup>409</sup> , Leu <sup>417</sup> , Tyr <sup>421</sup> , Phe <sup>422</sup>                                                                                      |
|     |                        |            | E-channel proteins                  | -5.42          | 106.8                 | Leu <sup>51</sup> , Pro <sup>54</sup> , Tyr <sup>57</sup>                                                                                                                                                                                                                                                                                      |
|     |                        |            | Spike Open Protein                  | -5.32          | 127.07                | Met <sup>740</sup> , Tyr <sup>741</sup> , Ile <sup>742</sup> , Cys <sup>743</sup> , Gly <sup>744</sup> , Asn <sup>856</sup> , Leu <sup>966</sup> , Ser <sup>967</sup> , Ser <sup>975</sup> , Val <sup>976</sup> , Leu <sup>977</sup> , Asn <sup>978</sup> , Arg <sup>1000</sup>                                                                |
|     |                        |            | Spike Close Protein                 | -5.92          | 45.69                 | Tyr <sup>38</sup> , Asp <sup>40</sup> , Lys <sup>41</sup> , Val <sup>42</sup> , Phe <sup>43</sup> , Arg <sup>44</sup> , Glu <sup>224</sup> , Pro <sup>225</sup> , Tyr <sup>279</sup> , Gly <sup>283</sup> , Thr <sup>284</sup>                                                                                                                 |
| 20  | 4-Hydroxycinnamic acid | 637542     | Main Protease (MPro)                | -6.68          | 12.71                 | Phe <sup>3</sup> , Lys <sup>5</sup> , Met <sup>6</sup> , Phe <sup>8</sup> , Pro <sup>9</sup> , Gln <sup>127</sup> , Phe <sup>291</sup> , Asp <sup>295</sup> , Arg <sup>298</sup> , Gln <sup>299</sup> , Gly <sup>302</sup> , Val <sup>303</sup> , Thr <sup>304</sup>                                                                           |
|     |                        |            | Papain like protease (PLPro)        | -6.83          | 9.79                  | His <sup>73</sup> , Thr <sup>74</sup> , Asp <sup>76</sup> , Phe <sup>79</sup> , Arg <sup>82</sup> , Ala <sup>153</sup> , Tyr <sup>154</sup> , Cys <sup>155</sup> , Asn <sup>156</sup> , His <sup>175</sup>                                                                                                                                     |
|     |                        |            | RNA-dependent RNA polymerase (RdRP) | -6.33          | 23.07                 | Pro <sup>323</sup> , Thr <sup>324</sup> , Phe <sup>326</sup> , Gly <sup>327</sup> , Tyr <sup>346</sup> , His <sup>347</sup> , Phe <sup>348</sup> , Arg <sup>349</sup> , Glu <sup>350</sup> , Phe <sup>396</sup> , Asn <sup>628</sup> , Ser <sup>664</sup> , Val <sup>675</sup> , Lys <sup>676</sup> , Pro <sup>677</sup> , basn <sup>118</sup> |
|     |                        |            | Helicase                            | -6.18          | 29.612                | Val <sup>496</sup> , Leu <sup>500</sup> , Thr <sup>501</sup> , Asn <sup>503</sup> , Trp <sup>506</sup> , Arg <sup>507</sup> , Ala <sup>509</sup> , Leu <sup>526</sup> , Gly <sup>527</sup> , Leu <sup>528</sup> , Tyr <sup>543</sup> , Ile <sup>545</sup> , Leu <sup>573</sup>                                                                 |
|     |                        |            | E-channel proteins                  | -6.29          | 24.51                 | No binding site was found                                                                                                                                                                                                                                                                                                                      |
|     |                        |            | Spike Open Protein                  | -6.49          | 17.55                 | Tyr <sup>38</sup> , Asp <sup>40</sup> , Lys <sup>41</sup> , Val <sup>42</sup> , Phe <sup>43</sup> , Arg <sup>44</sup> , Glu <sup>224</sup> , Pro <sup>225</sup> , Tyr <sup>279</sup> , Gly <sup>283</sup>                                                                                                                                      |

| Sr. | Ligands                      | PubChem ID | Proteins                            | Binding energy | Dissociation Constant | Active site residues                                                                                                                                                                                                                                                                                                     |
|-----|------------------------------|------------|-------------------------------------|----------------|-----------------------|--------------------------------------------------------------------------------------------------------------------------------------------------------------------------------------------------------------------------------------------------------------------------------------------------------------------------|
|     |                              |            |                                     | (kcal/mol)     | ( $\mu$ M)            |                                                                                                                                                                                                                                                                                                                          |
|     |                              |            | Spike Close Protein                 | -6.65          | 13.31                 | Tyr <sup>38</sup> , Asp <sup>40</sup> , Lys <sup>41</sup> , Val <sup>42</sup> , Phe <sup>43</sup> , Arg <sup>44</sup> , Glu <sup>224</sup> , Pro <sup>225</sup> , Tyr <sup>279</sup> , Asn <sup>282</sup> , Gly <sup>283</sup> , Thr <sup>284</sup>                                                                      |
| 21  | 4-o-Methylglycyrrhisoflavone | 637542     | Main Protease (MPro)                | -6.91          | 8.56                  | Arg <sup>131</sup> , Thr <sup>199</sup> , Ile <sup>200</sup> , Tyr <sup>237</sup> , Tyr <sup>239</sup> , Leu <sup>271</sup> , Leu <sup>272</sup> , Gly <sup>275</sup> , Met <sup>276</sup> , Ala <sup>285</sup> , Leu <sup>286</sup> , Leu <sup>287</sup> , Asp <sup>289</sup> , Glu <sup>290</sup>                      |
|     |                              |            | Papain like protease (PLPro)        | -8.61          | 0.49                  | Pro <sup>247</sup> , Pro <sup>248</sup> , Asn <sup>267</sup> , Tyr <sup>268</sup> , Gln <sup>269</sup>                                                                                                                                                                                                                   |
|     |                              |            | RNA-dependent RNA polymerase (RdRP) | -7.16          | 5.65                  | Arg <sup>197</sup> , Gly <sup>230</sup> , Val <sup>231</sup> , Pro <sup>232</sup> , Phe <sup>283</sup> , Asp <sup>284</sup> , Lys <sup>288</sup> , Tyr <sup>289</sup> , Trp <sup>290</sup> , Asp <sup>291</sup> , Gln <sup>292</sup> , Thr <sup>293</sup> , Tyr <sup>294</sup>                                           |
|     |                              |            | Helicase                            | -7.6           | 2.682                 | Ala <sup>1</sup> , Val <sup>6</sup> , Arg <sup>15</sup> , Arg <sup>21</sup> , Arg <sup>22</sup> , Pro <sup>23</sup> , Phe <sup>24</sup> , Arg <sup>129</sup> , Leu <sup>130</sup> , Leu <sup>132</sup> , Phe <sup>133</sup> , Glu <sup>136</sup> , Pro <sup>234</sup> , Leu <sup>235</sup> , Ser <sup>236</sup>          |
|     |                              |            | E-channel proteins                  | -7.95          | 1.48                  | No binding site was found                                                                                                                                                                                                                                                                                                |
|     |                              |            | Spike Open Protein                  | -6.58          | 15.15                 | Ser <sup>730</sup> , Thr <sup>778</sup> , Phe <sup>823</sup> , Val <sup>826</sup> , Thr <sup>827</sup> , Pro <sup>863</sup> , Asp <sup>867</sup> , Ile <sup>870</sup> , Ala <sup>1056</sup> , Pro <sup>1057</sup> , His <sup>1058</sup> , Gly <sup>1059</sup>                                                            |
|     |                              |            | Spike Close Protein                 | -6.17          | 30.17                 | His <sup>1101</sup> , Trp <sup>1102</sup> , Phe <sup>1103</sup> , Ile <sup>1114</sup> , Ile <sup>1115</sup> , Thr <sup>1136</sup> , Val <sup>1137</sup> , Tyr <sup>1138</sup>                                                                                                                                            |
| 22  | 4-o-Methylneobavaisoflavone  | 637542     | Main Protease (MPro)                | -7.07          | 6.6                   | Arg <sup>131</sup> , Lys <sup>137</sup> , Asp <sup>197</sup> , Thr <sup>199</sup> , Tyr <sup>237</sup> , Asn <sup>238</sup> , Tyr <sup>239</sup> , Leu <sup>271</sup> , Leu <sup>272</sup> , Gly <sup>275</sup> , Met <sup>276</sup> , Leu <sup>286</sup> , Leu <sup>287</sup> , Asp <sup>289</sup>                      |
|     |                              |            | Papain like protease (PLPro)        | -8.99          | 0.26                  | Arg <sup>166</sup> , Ser <sup>170</sup> , Val <sup>202</sup> , Glu <sup>203</sup> , Met <sup>206</sup> , Met <sup>208</sup>                                                                                                                                                                                              |
|     |                              |            | RNA-dependent RNA polymerase (RdRP) | -6.52          | 16.51                 | Ser <sup>255</sup> , Tyr <sup>265</sup> , Ile <sup>266</sup> , Lys <sup>267</sup> , Trp <sup>268</sup> , Leu <sup>270</sup> , Val <sup>320</sup> , Phe <sup>321</sup> , Pro <sup>322</sup> , Thr <sup>324</sup>                                                                                                          |
|     |                              |            | Helicase                            | -7.84          | 1.782                 | Asn <sup>179</sup> , Tyr <sup>180</sup> , Pro <sup>406</sup> , Pro <sup>408</sup> , Arg <sup>409</sup> , Thr <sup>410</sup> , Leu <sup>412</sup> , Thr <sup>413</sup> , Leu <sup>417</sup> , Pro <sup>419</sup> , Phe <sup>422</sup> , Asp <sup>534</sup> , Asn <sup>557</sup> , Asn <sup>559</sup> , Arg <sup>560</sup> |
|     |                              |            | E-channel proteins                  | -8.15          | 1.06                  | No binding site was found                                                                                                                                                                                                                                                                                                |
|     |                              |            | Spike Open Protein                  | -5.89          | 47.82                 | Leu <sup>54</sup> , Phe <sup>86</sup> , Asn <sup>87</sup> , Asp <sup>88</sup> , Asn <sup>196</sup> , Ile <sup>197</sup> , Asn <sup>234</sup> , Ile <sup>235</sup> , Thr <sup>236</sup> , Pro <sup>272</sup>                                                                                                              |
|     |                              |            | Spike Close Protein                 | -6.52          | 16.68                 | Trp <sup>886</sup> , Gly <sup>889</sup> , Ala <sup>890</sup> , Tyr <sup>904</sup> , Ser <sup>1030</sup> , Glu <sup>1031</sup> , Leu <sup>1034</sup> , Gly <sup>1035</sup> , Gln <sup>1036</sup> , Ser <sup>1037</sup> , Lys <sup>1038</sup> , Arg <sup>1039</sup>                                                        |

| Sr. | Ligands                          | PubChem ID | Proteins                            | Binding energy | Dissociation Constant | Active site residues                                                                                                                                                                                                                                                                                                                                                                                                                                   |
|-----|----------------------------------|------------|-------------------------------------|----------------|-----------------------|--------------------------------------------------------------------------------------------------------------------------------------------------------------------------------------------------------------------------------------------------------------------------------------------------------------------------------------------------------------------------------------------------------------------------------------------------------|
|     |                                  |            |                                     | (kcal/mol)     | ( $\mu$ M)            |                                                                                                                                                                                                                                                                                                                                                                                                                                                        |
| 23  | 6,9,12-Octadecatrienoic acid     | 5353640    | Main Protease (MPro)                | -4.45          | 544.39                | Trp <sup>218</sup> , Phe <sup>219</sup> , Leu <sup>220</sup> , Asn <sup>221</sup> , Arg <sup>222</sup> , Phe <sup>223</sup> , Ser <sup>267</sup> , Glu <sup>270</sup> , Leu <sup>271</sup> , Asn <sup>274</sup> , Gly <sup>275</sup> , Met <sup>276</sup> , Asn <sup>277</sup>                                                                                                                                                                         |
|     |                                  |            | Papain like protease (PLPro)        | -4.85          | 276.68                | Asp <sup>164</sup> , Arg <sup>166</sup> , Met <sup>208</sup> , Pro <sup>247</sup> , Pro <sup>248</sup> , Tyr <sup>268</sup>                                                                                                                                                                                                                                                                                                                            |
|     |                                  |            | RNA-dependent RNA polymerase (RdRP) | -4.88          | 266.59                | Phe <sup>441</sup> , Tyr <sup>546</sup> , Ala <sup>547</sup> , Ile <sup>548</sup> , Arg <sup>836</sup> , Ile <sup>837</sup> , Ala <sup>840</sup> , Phe <sup>843</sup> , Val <sup>844</sup> , Asp <sup>845</sup> , Arg <sup>858</sup> , Ser <sup>861</sup> , Leu <sup>862</sup> , Asp <sup>865</sup>                                                                                                                                                    |
|     |                                  |            | Helicase                            | -5.63          | 74.42                 | Ala <sup>4</sup> , Val <sup>6</sup> , Arg <sup>21</sup> , Arg <sup>22</sup> , Pro <sup>23</sup> , Phe <sup>24</sup> , Glu <sup>128</sup> , Arg <sup>129</sup> , Leu <sup>132</sup> , Phe <sup>133</sup> , Glu <sup>136</sup> , Pro <sup>234</sup> , Leu <sup>235</sup> , Ser <sup>236</sup> , Pro <sup>238</sup>                                                                                                                                       |
|     |                                  |            | E-channel proteins                  | -6.26          | 25.74                 | Phe <sup>26</sup> , Val <sup>29</sup> , Thr <sup>30</sup>                                                                                                                                                                                                                                                                                                                                                                                              |
|     |                                  |            | Spike Open Protein                  | -3.78          | 1698.07               | His <sup>66</sup> , Ala <sup>67</sup> , Ile <sup>68</sup> , Pro <sup>82</sup> , Asp <sup>138</sup> , Pro <sup>139</sup> , Phe <sup>140</sup> , Leu <sup>141</sup> , Gln <sup>239</sup> , Thr <sup>240</sup> , Leu <sup>241</sup> , Leu <sup>242</sup> , Tyr <sup>265</sup>                                                                                                                                                                             |
|     |                                  |            | Spike Close Protein                 | -5.3           | 130.33                | Trp <sup>104</sup> , Ile <sup>119</sup> , Asn <sup>121</sup> , Val <sup>126</sup> , Ile <sup>128</sup> , Phe <sup>168</sup> , Tyr <sup>170</sup> , Phe <sup>192</sup> , Phe <sup>194</sup> , Ile <sup>203</sup> , Leu <sup>226</sup> , Val <sup>227</sup> , Asp <sup>228</sup> , Leu <sup>229</sup>                                                                                                                                                    |
| 24  | 7,10,13,16-Docosatetraenoic acid | 2033       | Main Protease (MPro)                | -4.64          | 395.7                 | Arg <sup>131</sup> , Thr <sup>199</sup> , Tyr <sup>237</sup> , Tyr <sup>239</sup> , Leu <sup>271</sup> , Leu <sup>272</sup> , Gly <sup>275</sup> , Met <sup>276</sup> , Leu <sup>286</sup> , Leu <sup>287</sup> , Glu <sup>288</sup> , Asp <sup>289</sup>                                                                                                                                                                                              |
|     |                                  |            | Papain like protease (PLPro)        | -5.61          | 76.72                 | Pro <sup>247</sup> , Pro <sup>248</sup> , Asn <sup>267</sup> , Tyr <sup>268</sup>                                                                                                                                                                                                                                                                                                                                                                      |
|     |                                  |            | RNA-dependent RNA polymerase (RdRP) | -5.36          | 117.58                | Arg <sup>583</sup> , Ser <sup>592</sup> , Phe <sup>594</sup> , Tyr <sup>595</sup> , Ser <sup>861</sup> , Ile <sup>864</sup> , Asp <sup>865</sup> , Tyr <sup>915</sup> , Pro <sup>918</sup> , Glu <sup>919</sup>                                                                                                                                                                                                                                        |
|     |                                  |            | Helicase                            | -5.67          | 69.327                | Ala <sup>4</sup> , Cys <sup>5</sup> , Val <sup>6</sup> , Arg <sup>21</sup> , Arg <sup>22</sup> , Pro <sup>23</sup> , Phe <sup>24</sup> , Arg <sup>129</sup> , Leu <sup>132</sup> , Phe <sup>133</sup> , Glu <sup>136</sup> , Pro <sup>234</sup> , Leu <sup>235</sup> , Ser <sup>236</sup>                                                                                                                                                              |
|     |                                  |            | E-channel proteins                  | -6.74          | 11.57                 | No binding site was found                                                                                                                                                                                                                                                                                                                                                                                                                              |
|     |                                  |            | Spike Open Protein                  | -3.45          | 2963.8                | Leu <sup>54</sup> , Phe <sup>86</sup> , Asn <sup>87</sup> , Asp <sup>88</sup> , Asn <sup>196</sup> , Ile <sup>197</sup> , Asp <sup>198</sup> , Gly <sup>199</sup> , Ile <sup>233</sup> , Asn <sup>234</sup> , Ile <sup>235</sup> , Pro <sup>272</sup>                                                                                                                                                                                                  |
|     |                                  |            | Spike Close Protein                 | -5.22          | 148.92                | Val <sup>327</sup> , Val <sup>382</sup> , Ser <sup>383</sup> , Lys <sup>386</sup> , Asp <sup>389</sup> , Leu <sup>390</sup> , Cys <sup>391</sup> , Phe <sup>392</sup> , Thr <sup>393</sup> , Leu <sup>517</sup> , Leu <sup>518</sup> , His <sup>519</sup> , Ala <sup>520</sup> , Ala <sup>522</sup> , Lys <sup>528</sup> , Asn <sup>542</sup> , Asn <sup>544</sup> , Gly <sup>545</sup> , Leu <sup>546</sup> , Thr <sup>547</sup> , Phe <sup>565</sup> |

| Sr. | Ligands                                        | PubChem ID | Proteins                            | Binding energy | Dissociation Constant | Active site residues                                                                                                                                                                                                                                                                                                                                                                                                                            |
|-----|------------------------------------------------|------------|-------------------------------------|----------------|-----------------------|-------------------------------------------------------------------------------------------------------------------------------------------------------------------------------------------------------------------------------------------------------------------------------------------------------------------------------------------------------------------------------------------------------------------------------------------------|
|     |                                                |            |                                     | (kcal/mol)     | ( $\mu$ M)            |                                                                                                                                                                                                                                                                                                                                                                                                                                                 |
| 25  | 7,10,13,16-Docosatetraenoic acid, methyl ester | 5352981    | Main Protease (MPro)                | -4.43          | 570.73                | Thr <sup>199</sup> , Tyr <sup>237</sup> , Tyr <sup>239</sup> , Leu <sup>271</sup> , Leu <sup>272</sup> , Asn <sup>274</sup> , Gly <sup>275</sup> , Met <sup>276</sup> , Asn <sup>277</sup> , Gly <sup>278</sup> , Arg <sup>279</sup> , Ala <sup>285</sup> , Leu <sup>286</sup> , Leu <sup>287</sup>                                                                                                                                             |
|     |                                                |            | Papain like protease (PLPro)        | -6.55          | 15.78                 | Asp <sup>164</sup> , Val <sup>165</sup> , Arg <sup>166</sup> , Met <sup>208</sup> , Ser <sup>245</sup> , Ala <sup>246</sup> , Pro <sup>247</sup> , Pro <sup>248</sup> , Tyr <sup>264</sup> , Tyr <sup>268</sup> , Tyr <sup>273</sup> , Thr <sup>301</sup> , Asp <sup>302</sup>                                                                                                                                                                  |
|     |                                                |            | RNA-dependent RNA polymerase (RdRP) | -5.45          | 100.67                | Val <sup>335</sup> , Asp <sup>336</sup> , Val <sup>338</sup> , Pro <sup>339</sup> , Phe <sup>340</sup> , Arg <sup>365</sup> , Leu <sup>366</sup> , Leu <sup>371</sup>                                                                                                                                                                                                                                                                           |
|     |                                                |            | Helicase                            | -4.79          | 309.801               | Ala <sup>4</sup> , Cys <sup>5</sup> , Val <sup>6</sup> , Arg <sup>15</sup> , Arg <sup>21</sup> , Arg <sup>22</sup> , Pro <sup>23</sup> , Phe <sup>24</sup> , Arg <sup>129</sup> , Leu <sup>132</sup> , Phe <sup>133</sup> , Glu <sup>136</sup> , Pro <sup>234</sup> , Leu <sup>235</sup> , Ser <sup>236</sup>                                                                                                                                   |
|     |                                                |            | E-channel proteins                  | -6.57          | 15.38                 | Leu <sup>19</sup> , Phe <sup>20</sup> , Ala <sup>22</sup> , Phe <sup>23</sup> , Val <sup>24</sup> , Phe <sup>26</sup> , Leu <sup>27</sup> , Thr <sup>30</sup>                                                                                                                                                                                                                                                                                   |
|     |                                                |            | Spike Open Protein                  | -4.15          | 910.91                | Met <sup>740</sup> , Tyr <sup>741</sup> , Ile <sup>742</sup> , Cys <sup>743</sup> , Gly <sup>744</sup> , Phe <sup>855</sup> , Asn <sup>856</sup> , Val <sup>963</sup> , Leu <sup>966</sup> , Ser <sup>967</sup> , Ser <sup>975</sup> , Val <sup>976</sup> , Leu <sup>977</sup> , Asn <sup>978</sup> , Arg <sup>1000</sup>                                                                                                                       |
|     |                                                |            | Spike Close Protein                 | -5.68          | 69.09                 | Cys <sup>336</sup> , Phe <sup>338</sup> , Gly <sup>339</sup> , Phe <sup>342</sup> , Asn <sup>343</sup> , Asp <sup>364</sup> , Val <sup>367</sup> , Leu <sup>368</sup> , Ser <sup>371</sup> , Ala <sup>372</sup> , Ser <sup>373</sup> , Phe <sup>374</sup> , Ser <sup>375</sup> , Trp <sup>436</sup> , Asn <sup>437</sup> , Ser <sup>438</sup> , Asn <sup>440</sup> , Leu <sup>441</sup> , Arg <sup>509</sup>                                    |
| 26  | 8-Prenylmucronulatol                           | 637051     | Main Protease (MPro)                | -6.99          | 7.48                  | Thr <sup>25</sup> , Leu <sup>27</sup> , His <sup>41</sup> , Cys <sup>44</sup> , Thr <sup>45</sup> , Ser <sup>46</sup> , Met <sup>49</sup> , Leu <sup>141</sup> , Asn <sup>142</sup> , Gly <sup>143</sup> , Ser <sup>144</sup> , Cys <sup>145</sup> , His <sup>164</sup> , Met <sup>165</sup> , Glu <sup>166</sup> , Leu <sup>167</sup> , Pro <sup>168</sup> , Arg <sup>188</sup> , Gln <sup>189</sup> , Thr <sup>190</sup> , Gln <sup>192</sup> |
|     |                                                |            | Papain like protease (PLPro)        | -9.01          | 0.25                  | Pro <sup>247</sup> , Pro <sup>248</sup> , Asn <sup>267</sup> , Tyr <sup>268</sup>                                                                                                                                                                                                                                                                                                                                                               |
|     |                                                |            | RNA-dependent RNA polymerase (RdRP) | -7.24          | 4.9                   | Tyr <sup>32</sup> , Lys <sup>47</sup> , Tyr <sup>129</sup> , Ala <sup>130</sup> , His <sup>133</sup> , Phe <sup>134</sup> , Asp <sup>135</sup> , Asn <sup>138</sup> , Cys <sup>139</sup> , Ser <sup>709</sup> , Thr <sup>710</sup> , Asp <sup>711</sup> , Lys <sup>714</sup> , Gln <sup>773</sup> , Gly <sup>774</sup> , Asn <sup>781</sup> , Ser <sup>784</sup>                                                                                |
|     |                                                |            | Helicase                            | -7.39          | 3.835                 | Pro <sup>175</sup> , Asn <sup>177</sup> , Asn <sup>179</sup> , Tyr <sup>180</sup> , Gln <sup>404</sup> , Leu <sup>405</sup> , Pro <sup>406</sup> , Ala <sup>407</sup> , Pro <sup>408</sup> , Arg <sup>409</sup> , Thr <sup>410</sup> , Leu <sup>412</sup> , Thr <sup>413</sup> , Thr <sup>416</sup> , Leu <sup>417</sup> , Phe <sup>422</sup> , Asn <sup>557</sup> , Asn <sup>559</sup> , Arg <sup>560</sup>                                    |
|     |                                                |            | E-channel proteins                  | -7.8           | 1.93                  | No binding site was found                                                                                                                                                                                                                                                                                                                                                                                                                       |
|     |                                                |            | Spike Open Protein                  | -6.91          | 8.61                  | Arg <sup>355</sup> , Tyr <sup>396</sup> , Pro <sup>426</sup> , Asp <sup>428</sup> , Phe <sup>429</sup> , Thr <sup>430</sup> , Pro <sup>463</sup> , Phe <sup>464</sup> , Glu <sup>465</sup> , Ser <sup>514</sup> , Phe <sup>515</sup> , Glu <sup>516</sup> , Leu <sup>517</sup> , Leu <sup>518</sup>                                                                                                                                             |

| Sr. | Ligands       | PubChem ID | Proteins                            | Binding energy | Dissociation Constant | Active site residues                                                                                                                                                                                                                                                                                                                                              |
|-----|---------------|------------|-------------------------------------|----------------|-----------------------|-------------------------------------------------------------------------------------------------------------------------------------------------------------------------------------------------------------------------------------------------------------------------------------------------------------------------------------------------------------------|
|     |               |            |                                     | (kcal/mol)     | ( $\mu$ M)            |                                                                                                                                                                                                                                                                                                                                                                   |
|     |               |            | Spike Close Protein                 | -7.07          | 6.58                  | Leu <sup>335</sup> , Cys <sup>336</sup> , Pro <sup>337</sup> , Phe <sup>338</sup> , Gly <sup>339</sup> , Glu <sup>340</sup> , Phe <sup>342</sup> , Asn <sup>343</sup> , Asp <sup>364</sup> , Val <sup>367</sup> , Leu <sup>368</sup> , Ser <sup>371</sup> , Ser <sup>373</sup> , Phe <sup>374</sup> , Trp <sup>436</sup>                                          |
| 27  | Aconitic acid | 309        | Main Protease (MPro)                | -5.75          | 61.5                  | Met <sup>6</sup> , Ala <sup>7</sup> , Phe <sup>8</sup> , Pro <sup>9</sup> , Asp <sup>295</sup> , Arg <sup>298</sup> , Gln <sup>299</sup> , Gly <sup>302</sup> , Val <sup>303</sup> , Thr <sup>304</sup>                                                                                                                                                           |
|     |               |            | Papain like protease (PLPro)        | -6.53          | 16.35                 | No binding site was found                                                                                                                                                                                                                                                                                                                                         |
|     |               |            | RNA-dependent RNA polymerase (RdRP) | -5.95          | 43.73                 | Gly <sup>616</sup> , Trp <sup>617</sup> , Asp <sup>618</sup> , Asp <sup>761</sup> , Ala <sup>762</sup> , Lys <sup>798</sup> , Cys <sup>799</sup> , Trp <sup>800</sup> , Glu <sup>811</sup> , Phe <sup>812</sup> , Cys <sup>813</sup> , Ser <sup>814</sup>                                                                                                         |
|     |               |            | Helicase                            | -5.7           | 65.904                | Gln <sup>281</sup> , Asp <sup>401</sup> , Pro <sup>402</sup> , Ala <sup>403</sup> , Pro <sup>419</sup> , Met <sup>429</sup> , Lys <sup>430</sup> , Pro <sup>434</sup> , Tyr <sup>457</sup> , Asp <sup>458</sup> , Asn <sup>459</sup> , Asn <sup>559</sup>                                                                                                         |
|     |               |            | E-channel proteins                  | -5.05          | 198.41                | Leu <sup>51</sup> , Pro <sup>54</sup> , Tyr <sup>57</sup>                                                                                                                                                                                                                                                                                                         |
|     |               |            | Spike Open Protein                  | -5.33          | 124.74                | Tyr <sup>38</sup> , Asp <sup>40</sup> , Lys <sup>41</sup> , Val <sup>42</sup> , Phe <sup>43</sup> , Arg <sup>44</sup> , Glu <sup>224</sup> , Pro <sup>225</sup> , Tyr <sup>279</sup> , Gly <sup>283</sup> , Thr <sup>284</sup>                                                                                                                                    |
|     |               |            | Spike Close Protein                 | -5.45          | 100.67                | Gly <sup>744</sup> , Phe <sup>855</sup> , Asn <sup>856</sup> , Leu <sup>966</sup> , Ser <sup>975</sup> , Val <sup>976</sup> , Leu <sup>977</sup> , Asn <sup>978</sup> , Arg <sup>1000</sup>                                                                                                                                                                       |
| 28  | Agaritrine    | 439517     | Main Protease (MPro)                | -6.6           | 14.55                 | Met <sup>6</sup> , Ala <sup>7</sup> , Phe <sup>8</sup> , Pro <sup>9</sup> , Gln <sup>127</sup> , Ile <sup>152</sup> , Asp <sup>295</sup> , Arg <sup>298</sup> , Gln <sup>299</sup> , Gly <sup>302</sup> , Val <sup>303</sup> , Thr <sup>304</sup>                                                                                                                 |
|     |               |            | Papain like protease (PLPro)        | -7.1           | 6.24                  | Cys <sup>155</sup> , Asn <sup>156</sup> , Lys <sup>157</sup> , Glu <sup>161</sup> , Leu <sup>162</sup> , Glu <sup>167</sup> , Tyr <sup>171</sup>                                                                                                                                                                                                                  |
|     |               |            | RNA-dependent RNA polymerase (RdRP) | -6.14          | 31.36                 | Lys <sup>47</sup> , Tyr <sup>129</sup> , Ala <sup>130</sup> , His <sup>133</sup> , Phe <sup>134</sup> , Asp <sup>135</sup> , Asn <sup>138</sup> , Cys <sup>139</sup> , Asp <sup>140</sup> , Thr <sup>141</sup> , Leu <sup>142</sup> , Asn <sup>705</sup> , Ala <sup>706</sup> , Ser <sup>709</sup> , Lys <sup>780</sup> , Asn <sup>781</sup> , Ser <sup>784</sup> |
|     |               |            | Helicase                            | -6.64          | 13.623                | Val <sup>6</sup> , Arg <sup>15</sup> , Arg <sup>21</sup> , Arg <sup>22</sup> , Pro <sup>23</sup> , Phe <sup>24</sup> , Arg <sup>129</sup> , Leu <sup>132</sup> , Phe <sup>133</sup> , Glu <sup>136</sup> , Pro <sup>234</sup> , Leu <sup>235</sup>                                                                                                                |
|     |               |            | E-channel proteins                  | -6.2           | 28.63                 | Leu <sup>28</sup> , Val <sup>29</sup> , Ala <sup>32</sup>                                                                                                                                                                                                                                                                                                         |
|     |               |            | Spike Open Protein                  | -5.79          | 57.1                  | Arg <sup>355</sup> , Tyr <sup>396</sup> , Pro <sup>426</sup> , Asp <sup>428</sup> , Phe <sup>429</sup> , Thr <sup>430</sup> , Phe <sup>464</sup> , Ser <sup>514</sup> , Phe <sup>515</sup> , Glu <sup>516</sup>                                                                                                                                                   |

| Sr. | Ligands  | PubChem ID | Proteins                            | Binding energy | Dissociation Constant | Active site residues                                                                                                                                                                                                                                                            |
|-----|----------|------------|-------------------------------------|----------------|-----------------------|---------------------------------------------------------------------------------------------------------------------------------------------------------------------------------------------------------------------------------------------------------------------------------|
|     |          |            |                                     | (kcal/mol)     | ( $\mu$ M)            |                                                                                                                                                                                                                                                                                 |
|     |          |            | Spike Close Protein                 | -5.76          | 60.37                 | Pro <sup>426</sup> , Asp <sup>428</sup> , Phe <sup>429</sup> , Thr <sup>430</sup> , Pro <sup>463</sup> , Phe <sup>464</sup> , Ser <sup>514</sup> , Phe <sup>515</sup> , Glu <sup>516</sup>                                                                                      |
| 29  | Agnuside | 442416     | Main Protease (MPro)                | -7.28          | 4.61                  | Ile <sup>106</sup> , Gln <sup>110</sup> , Thr <sup>111</sup> , Asn <sup>151</sup> , Asp <sup>153</sup> , Thr <sup>292</sup> , Phe <sup>294</sup> , Asp <sup>295</sup> , Val <sup>297</sup> , Arg <sup>298</sup> , Ser <sup>301</sup> , Val <sup>303</sup>                       |
|     |          |            | Papain like protease (PLPro)        | -9.07          | 0.22                  | Phe <sup>69</sup> , His <sup>73</sup> , Thr <sup>74</sup> , Thr <sup>75</sup> , Asp <sup>76</sup> , Phe <sup>79</sup> , Arg <sup>82</sup> , Tyr <sup>154</sup> , Gln <sup>174</sup> , His <sup>175</sup>                                                                        |
|     |          |            | RNA-dependent RNA polymerase (RdRP) | -6.17          | 29.86                 | Asp <sup>269</sup> , Leu <sup>271</sup> , Lys <sup>272</sup> , Tyr <sup>273</sup> , Asp <sup>274</sup> , Phe <sup>275</sup> , Glu <sup>277</sup>                                                                                                                                |
|     |          |            | Helicase                            | -7.38          | 3.874                 | Ala <sup>4</sup> , Val <sup>6</sup> , Arg <sup>15</sup> , Arg <sup>21</sup> , Arg <sup>22</sup> , Pro <sup>23</sup> , Phe <sup>24</sup> , Arg <sup>129</sup> , Leu <sup>132</sup> , Phe <sup>133</sup> , Glu <sup>136</sup> , Pro <sup>234</sup> , Leu <sup>235</sup>           |
|     |          |            | E-channel proteins                  | -7.69          | 2.33                  | Ile <sup>46</sup> , Leu <sup>51</sup> , Pro <sup>54</sup> , Phe <sup>56</sup> , Tyr <sup>57</sup> , Ser <sup>60</sup>                                                                                                                                                           |
|     |          |            | Spike Open Protein                  | -6             | 40.12                 | Trp <sup>104</sup> , Ile <sup>119</sup> , Asn <sup>121</sup> , Val <sup>126</sup> , Ile <sup>128</sup> , Tyr <sup>170</sup> , Ser <sup>172</sup> , Phe <sup>192</sup> , Phe <sup>194</sup> , Ile <sup>203</sup> , Ser <sup>205</sup> , Leu <sup>226</sup> , Val <sup>227</sup>  |
|     |          |            | Spike Close Protein                 | -6.14          | 31.41                 | Met <sup>740</sup> , Tyr <sup>741</sup> , Gly <sup>744</sup> , Asp <sup>745</sup> , Phe <sup>855</sup> , Asn <sup>856</sup> , Leu <sup>966</sup> , Ser <sup>967</sup> , Ser <sup>975</sup> , Val <sup>976</sup> , Leu <sup>977</sup> , Asn <sup>978</sup> , Arg <sup>1000</sup> |
| 30  | Alizarin | 6293       | Main Protease (MPro)                | -7.42          | 3.65                  | Val <sup>104</sup> , Ile <sup>106</sup> , Gln <sup>110</sup> , Thr <sup>111</sup> , Asn <sup>151</sup> , Asp <sup>153</sup> , Ser <sup>158</sup> , Thr <sup>292</sup> , Phe <sup>294</sup> , Asp <sup>295</sup> , Arg <sup>298</sup>                                            |
|     |          |            | Papain like protease (PLPro)        | -7.28          | 4.58                  | Val <sup>187</sup> , Gln <sup>195</sup> , Thr <sup>197</sup> , Ile <sup>222</sup> , Pro <sup>223</sup> , Cys <sup>224</sup> , Thr <sup>225</sup> , Ala <sup>230</sup> , Lys <sup>232</sup>                                                                                      |
|     |          |            | RNA-dependent RNA polymerase (RdRP) | -7.19          | 5.37                  | Lys <sup>411</sup> , Pro <sup>412</sup> , Gly <sup>413</sup> , Asn <sup>414</sup> , Tyr <sup>546</sup> , Val <sup>844</sup> , Asp <sup>845</sup> , Asp <sup>846</sup> , cser <sup>15</sup> , cgl <sup>18</sup> , cgl <sup>19</sup>                                              |
|     |          |            | Helicase                            | -7.75          | 2.071                 | Leu <sup>405</sup> , Pro <sup>406</sup> , Arg <sup>409</sup> , Thr <sup>410</sup> , Leu <sup>412</sup> , Leu <sup>417</sup> , Pro <sup>419</sup> , Phe <sup>422</sup> , Asn <sup>557</sup> , Asn <sup>559</sup> , Arg <sup>560</sup>                                            |
|     |          |            | E-channel proteins                  | -7.24          | 4.92                  | No binding site was found                                                                                                                                                                                                                                                       |
|     |          |            | Spike Open Protein                  | -6.58          | 15.15                 | Glu <sup>554</sup> , Ser <sup>555</sup> , Asn <sup>556</sup> , Lys <sup>557</sup> , Lys <sup>558</sup> , Phe <sup>559</sup> , Leu <sup>560</sup> , Arg <sup>577</sup> , Leu <sup>582</sup> , Glu <sup>583</sup> , Ile <sup>584</sup>                                            |

| Sr. | Ligands                     | PubChem ID | Proteins                            | Binding energy | Dissociation Constant | Active site residues                                                                                                                                                                                                                                                                                                                                               |
|-----|-----------------------------|------------|-------------------------------------|----------------|-----------------------|--------------------------------------------------------------------------------------------------------------------------------------------------------------------------------------------------------------------------------------------------------------------------------------------------------------------------------------------------------------------|
|     |                             |            |                                     | (kcal/mol)     | ( $\mu$ M)            |                                                                                                                                                                                                                                                                                                                                                                    |
|     |                             |            | Spike Close Protein                 | -7.05          | 6.82                  | Tyr <sup>38</sup> , Asp <sup>40</sup> , Lys <sup>41</sup> , Val <sup>42</sup> , Phe <sup>43</sup> , Arg <sup>44</sup> , Glu <sup>224</sup> , Pro <sup>225</sup> , Tyr <sup>279</sup> , Gly <sup>283</sup>                                                                                                                                                          |
| 31  | Alpha pinenene              | 6654       | Main Protease (MPro)                | -5.37          | 116.2                 | Trp <sup>218</sup> , Phe <sup>219</sup> , Asn <sup>221</sup> , Phe <sup>223</sup> , Ser <sup>267</sup> , Glu <sup>270</sup> , Leu <sup>271</sup> , Asn <sup>274</sup> , Gly <sup>275</sup> , Asn <sup>277</sup>                                                                                                                                                    |
|     |                             |            | Papain like protease (PLPro)        | -5.38          | 113.68                | Asp <sup>164</sup> , Val <sup>165</sup> , Pro <sup>247</sup> , Pro <sup>248</sup> , Tyr <sup>264</sup> , Asn <sup>267</sup> , Tyr <sup>268</sup> , Tyr <sup>273</sup> , Thr <sup>301</sup>                                                                                                                                                                         |
|     |                             |            | RNA-dependent RNA polymerase (RdRP) | -4.91          | 250.87                | Ser <sup>592</sup> , Phe <sup>594</sup> , Tyr <sup>595</sup> , Ile <sup>864</sup> , Tyr <sup>915</sup>                                                                                                                                                                                                                                                             |
|     |                             |            | Helicase                            | -6.18          | 29.512                | Val <sup>496</sup> , Phe <sup>499</sup> , Leu <sup>500</sup> , Thr <sup>501</sup> , Asn <sup>503</sup> , Trp <sup>506</sup> , Arg <sup>507</sup> , Ala <sup>509</sup> , Leu <sup>526</sup> , Leu <sup>528</sup> , Tyr <sup>543</sup> , Ile <sup>545</sup> , Leu <sup>573</sup>                                                                                     |
|     |                             |            | E-channel proteins                  | -5.87          | 49.47                 | No binding site was found                                                                                                                                                                                                                                                                                                                                          |
|     |                             |            | Spike Open Protein                  | -5.68          | 68.86                 | Tyr <sup>38</sup> , Asp <sup>40</sup> , Lys <sup>41</sup> , Val <sup>42</sup> , Phe <sup>43</sup> , Arg <sup>44</sup> , Glu <sup>224</sup> , Pro <sup>225</sup> , Tyr <sup>279</sup> , Gly <sup>283</sup>                                                                                                                                                          |
|     |                             |            | Spike Close Protein                 | -5.9           | 47.42                 | Tyr <sup>38</sup> , Asp <sup>40</sup> , Lys <sup>41</sup> , Val <sup>42</sup> , Phe <sup>43</sup> , Arg <sup>44</sup> , Glu <sup>224</sup> , Pro <sup>225</sup> , Tyr <sup>279</sup> , Gly <sup>283</sup>                                                                                                                                                          |
| 32  | Anhydrosecoisolariciresinol | 9974771    | Main Protease (MPro)                | -6.55          | 15.83                 | Arg <sup>131</sup> , Lys <sup>137</sup> , Asp <sup>197</sup> , Thr <sup>199</sup> , Tyr <sup>237</sup> , Tyr <sup>239</sup> , Leu <sup>271</sup> , Leu <sup>272</sup> , Gly <sup>275</sup> , Met <sup>276</sup> , Ala <sup>285</sup> , Leu <sup>286</sup> , Leu <sup>287</sup> , Asp <sup>289</sup> , Glu <sup>290</sup>                                           |
|     |                             |            | Papain like protease (PLPro)        | -7.23          | 5.02                  | Lys <sup>157</sup> , Glu <sup>161</sup> , Leu <sup>162</sup> , Gly <sup>163</sup> , Asp <sup>164</sup> , Glu <sup>167</sup> , Tyr <sup>268</sup> , Gln <sup>269</sup>                                                                                                                                                                                              |
|     |                             |            | RNA-dependent RNA polymerase (RdRP) | -6.42          | 19.78                 | Asp <sup>717</sup> , Tyr <sup>719</sup> , Val <sup>720</sup> , Asn <sup>722</sup> , Leu <sup>723</sup> , Arg <sup>726</sup> , Glu <sup>744</sup> , Ala <sup>747</sup> , Tyr <sup>748</sup> , Lys <sup>751</sup> , His <sup>752</sup> , Tyr <sup>770</sup>                                                                                                          |
|     |                             |            | Helicase                            | -7.18          | 5.504                 | Gly <sup>3</sup> , Ala <sup>4</sup> , Val <sup>6</sup> , Arg <sup>21</sup> , Pro <sup>23</sup> , Phe <sup>24</sup> , Arg <sup>129</sup> , Leu <sup>132</sup> , Phe <sup>133</sup> , Glu <sup>136</sup> , Pro <sup>234</sup> , Leu <sup>235</sup> , Ser <sup>236</sup>                                                                                              |
|     |                             |            | E-channel proteins                  | -6.48          | 17.85                 | Leu <sup>28</sup> , Val <sup>29</sup> , Ala <sup>32</sup>                                                                                                                                                                                                                                                                                                          |
|     |                             |            | Spike Open Protein                  | -5.78          | 58.36                 | Arg <sup>403</sup> , Tyr <sup>453</sup> , Ser <sup>494</sup> , Tyr <sup>495</sup> , Gly <sup>496</sup> , Phe <sup>497</sup> , Asn <sup>501</sup> , Tyr <sup>505</sup>                                                                                                                                                                                              |
|     |                             |            | Spike Close Protein                 | -6.17          | 30.22                 | Trp <sup>104</sup> , Ile <sup>119</sup> , Asn <sup>121</sup> , Val <sup>126</sup> , Ile <sup>128</sup> , Tyr <sup>170</sup> , Ser <sup>172</sup> , Arg <sup>190</sup> , Glu <sup>191</sup> , Phe <sup>192</sup> , Phe <sup>194</sup> , Ile <sup>203</sup> , Ser <sup>205</sup> , Lys <sup>206</sup> , His <sup>207</sup> , Leu <sup>226</sup> , Val <sup>227</sup> |



| Sr. | Ligands       | PubChem ID | Proteins                            | Binding energy | Dissociation Constant | Active site residues                                                                                                                                                                                                                                                                                                                                              |
|-----|---------------|------------|-------------------------------------|----------------|-----------------------|-------------------------------------------------------------------------------------------------------------------------------------------------------------------------------------------------------------------------------------------------------------------------------------------------------------------------------------------------------------------|
|     |               |            |                                     | (kcal/mol)     | ( $\mu$ M)            |                                                                                                                                                                                                                                                                                                                                                                   |
| 33  | Apigenin      | 5280443    | Main Protease (MPro)                | -7.26          | 4.74                  | Met <sup>49</sup> , Phe <sup>140</sup> , Leu <sup>141</sup> , Asn <sup>142</sup> , Gly <sup>143</sup> , Ser <sup>144</sup> , Cys <sup>145</sup> , His <sup>163</sup> , Met <sup>165</sup> , Glu <sup>166</sup> , Leu <sup>167</sup> , Pro <sup>168</sup> , His <sup>172</sup> , Arg <sup>188</sup> , Gln <sup>189</sup> , Thr <sup>190</sup> , Gln <sup>192</sup> |
|     |               |            | Papain like protease (PLPro)        | -9.21          | 0.18                  | Phe <sup>69</sup> , His <sup>73</sup> , Thr <sup>74</sup> , Thr <sup>75</sup> , Asp <sup>76</sup> , Phe <sup>79</sup> , Arg <sup>82</sup> , Ala <sup>153</sup> , Tyr <sup>154</sup> , Asn <sup>156</sup> , Gln <sup>174</sup> , His <sup>175</sup>                                                                                                                |
|     |               |            | RNA-dependent RNA polymerase (RdRP) | -7.48          | 3.28                  | Gly <sup>590</sup> , Thr <sup>591</sup> , Ser <sup>592</sup> , Lys <sup>593</sup> , Phe <sup>594</sup> , Gln <sup>815</sup> , Pro <sup>830</sup> , Tyr <sup>831</sup> , Pro <sup>832</sup> , Asp <sup>865</sup> , Pro <sup>868</sup> , Trp <sup>916</sup>                                                                                                         |
|     |               |            | Helicase                            | -7.45          | 3.489                 | Asn <sup>179</sup> , Pro <sup>406</sup> , Pro <sup>408</sup> , Arg <sup>409</sup> , Thr <sup>410</sup> , Leu <sup>412</sup> , Thr <sup>416</sup> , Leu <sup>417</sup> , Phe <sup>422</sup> , Asn <sup>557</sup> , Asn <sup>559</sup> , Arg <sup>560</sup>                                                                                                         |
|     |               |            | E-channel proteins                  | -7.37          | 3.99                  | Ile <sup>46</sup> , Ser <sup>50</sup> , Leu <sup>51</sup> , Pro <sup>54</sup> , Phe <sup>56</sup> , Tyr <sup>57</sup>                                                                                                                                                                                                                                             |
|     |               |            | Spike Open Protein                  | -6.86          | 9.4                   | Arg <sup>355</sup> , Tyr <sup>396</sup> , Pro <sup>426</sup> , Asp <sup>428</sup> , Phe <sup>429</sup> , Thr <sup>430</sup> , Phe <sup>464</sup> , Ser <sup>514</sup> , Phe <sup>515</sup> , Glu <sup>516</sup> , Leu <sup>517</sup> , Leu <sup>518</sup>                                                                                                         |
|     |               |            | Spike Close Protein                 | -7.38          | 3.89                  | Glu <sup>96</sup> , Asn <sup>99</sup> , Ile <sup>101</sup> , Arg <sup>102</sup> , Gly <sup>103</sup> , Trp <sup>104</sup> , Ile <sup>119</sup> , Asn <sup>121</sup> , Val <sup>126</sup> , Arg <sup>190</sup> , Phe <sup>192</sup> , Ser <sup>205</sup> , Lys <sup>206</sup> , His <sup>207</sup> , Leu <sup>226</sup>                                            |
| 34  | Ascorbic acid | 54670067   | Main Protease (MPro)                | -4.96          | 232.53                | Arg <sup>131</sup> , Lys <sup>137</sup> , Asp <sup>197</sup> , Thr <sup>198</sup> , Thr <sup>199</sup> , Leu <sup>286</sup> , Leu <sup>287</sup> , Glu <sup>288</sup> , Asp <sup>289</sup> , Glu <sup>290</sup>                                                                                                                                                   |
|     |               |            | Papain like protease (PLPro)        | -5.66          | 71.1                  | Cys <sup>155</sup> , Asn <sup>156</sup> , Lys <sup>157</sup> , Glu <sup>167</sup> , Tyr <sup>171</sup>                                                                                                                                                                                                                                                            |
|     |               |            | RNA-dependent RNA polymerase (RdRP) | -5.95          | 43.29                 | Tyr <sup>456</sup> , Arg <sup>555</sup> , Thr <sup>556</sup> , Val <sup>557</sup> , Asp <sup>623</sup> , Arg <sup>624</sup> , Lys <sup>676</sup> , Thr <sup>680</sup> , Ser <sup>681</sup> , Ser <sup>682</sup>                                                                                                                                                   |
|     |               |            | Helicase                            | -6.51          | 16.994                | Trp <sup>114</sup> , Tyr <sup>120</sup> , Ala <sup>123</sup> , Asn <sup>124</sup> , Lys <sup>131</sup> , Ala <sup>134</sup> , Ala <sup>135</sup> , Leu <sup>138</sup> , Thr <sup>380</sup> , Asn <sup>381</sup> , Tyr <sup>382</sup> , Arg <sup>409</sup> , Leu <sup>417</sup> , Tyr <sup>421</sup> , Phe <sup>422</sup> , Asn <sup>423</sup>                     |
|     |               |            | E-channel proteins                  | -4.54          | 471.63                | No binding site was found                                                                                                                                                                                                                                                                                                                                         |
|     |               |            | Spike Open Protein                  | -5.79          | 56.62                 | Val <sup>729</sup> , Ser <sup>730</sup> , Met <sup>731</sup> , Thr <sup>732</sup> , Lys <sup>733</sup> , Thr <sup>778</sup> , Phe <sup>782</sup> , Pro <sup>863</sup> , Leu <sup>865</sup> , Asp <sup>867</sup> , Ile <sup>870</sup> , Ala <sup>1056</sup> , Pro <sup>1057</sup> , His <sup>1058</sup> , Gly <sup>1059</sup>                                      |
|     |               |            | Spike Close Protein                 | -5.54          | 86.92                 | Phe <sup>329</sup> , Pro <sup>330</sup> , Asn <sup>331</sup> , Ile <sup>332</sup> , Thr <sup>333</sup> , Val <sup>362</sup> , Cys <sup>525</sup> , Gly <sup>526</sup> , Pro <sup>527</sup> , Lys <sup>528</sup> , Lys <sup>529</sup> , Ser <sup>530</sup> , Gln <sup>580</sup>                                                                                    |

| Sr. | Ligands     | PubChem ID | Proteins                            | Binding energy | Dissociation Constant | Active site residues                                                                                                                                                                                                                                                                                                                                                                                 |
|-----|-------------|------------|-------------------------------------|----------------|-----------------------|------------------------------------------------------------------------------------------------------------------------------------------------------------------------------------------------------------------------------------------------------------------------------------------------------------------------------------------------------------------------------------------------------|
|     |             |            |                                     | (kcal/mol)     | ( $\mu$ M)            |                                                                                                                                                                                                                                                                                                                                                                                                      |
| 35  | Baicalin    | 64982      | Main Protease (MPro)                | -8.85          | 0.33                  | Val <sup>104</sup> , Ile <sup>106</sup> , Gln <sup>110</sup> , Thr <sup>111</sup> , Asn <sup>151</sup> , Ile <sup>152</sup> , Asp <sup>153</sup> , Tyr <sup>154</sup> , Pro <sup>252</sup> , Thr <sup>292</sup> , Phe <sup>294</sup> , Asp <sup>295</sup> , Val <sup>297</sup> , Arg <sup>298</sup> , Val <sup>303</sup>                                                                             |
|     |             |            | Papain like protease (PLPro)        | -10.82         | 0.01                  | Cys <sup>155</sup> , Asn <sup>156</sup> , Lys <sup>157</sup> , Glu <sup>161</sup> , Leu <sup>162</sup> , Gly <sup>163</sup> , Asp <sup>164</sup> , Val <sup>165</sup> , Arg <sup>166</sup> , Glu <sup>167</sup> ,                                                                                                                                                                                    |
|     |             |            |                                     |                |                       | Tyr <sup>171</sup> , Val <sup>202</sup> , Met <sup>206</sup> , Met <sup>208</sup> , Pro <sup>248</sup> , Tyr <sup>264</sup> , Tyr <sup>268</sup> , Gln <sup>269</sup> , Tyr <sup>273</sup>                                                                                                                                                                                                           |
|     |             |            | RNA-dependent RNA polymerase (RdRP) | -9.01          | 0.25                  | Val <sup>31</sup> , Tyr <sup>32</sup> , Lys <sup>47</sup> , Tyr <sup>129</sup> , Ala <sup>130</sup> , His <sup>133</sup> , Phe <sup>134</sup> , Asp <sup>135</sup> , Asn <sup>138</sup> , Cys <sup>139</sup> , Thr <sup>141</sup> , Asn <sup>705</sup> , Ala <sup>706</sup> , Ser <sup>709</sup> , Thr <sup>710</sup> , Lys <sup>780</sup> , Asn <sup>781</sup> , Ser <sup>784</sup>                 |
|     |             |            | Helicase                            | -8.9           | 0.29                  | Asn <sup>177</sup> , Arg <sup>178</sup> , Thr <sup>199</sup> , Phe <sup>200</sup> , Glu <sup>201</sup> , Lys <sup>202</sup> , Arg <sup>212</sup> , Asn <sup>516</sup> , Asn <sup>519</sup> , Ala <sup>520</sup> , Thr <sup>530</sup> , Gln <sup>531</sup> , Thr <sup>532</sup> , Asp <sup>534</sup>                                                                                                  |
|     |             |            | E-channel proteins                  | -8.89          | 0.3                   | No binding site was found                                                                                                                                                                                                                                                                                                                                                                            |
|     |             |            | Spike Open Protein                  | -7.47          | 3.37                  | Met <sup>740</sup> , Gly <sup>744</sup> , Asp <sup>745</sup> , Phe <sup>855</sup> , Asn <sup>856</sup> , Gly <sup>857</sup> , Val <sup>963</sup> , Leu <sup>966</sup> , Ser <sup>967</sup> , Ser <sup>975</sup> , Val <sup>976</sup> , Leu <sup>977</sup> , Asn <sup>978</sup> , Arg <sup>1000</sup>                                                                                                 |
| 36  | Balsacone A | 71602340   | Spike Close Protein                 | -7.95          | 1.48                  | Tyr <sup>789</sup> , Lys <sup>790</sup> , Thr <sup>791</sup> , Lys <sup>795</sup> , Ser <sup>803</sup> , Gln <sup>804</sup> , Leu <sup>806</sup> , Pro <sup>807</sup> , Asp <sup>808</sup> , Pro <sup>809</sup> , Ser <sup>816</sup> , Phe <sup>817</sup> , Ser <sup>875</sup> , Ala <sup>876</sup> , Ala <sup>879</sup>                                                                             |
|     |             |            | Main Protease (MPro)                | -7.37          | 3.93                  | Thr <sup>24</sup> , Thr <sup>25</sup> , Thr <sup>26</sup> , His <sup>41</sup> , Cys <sup>44</sup> , Thr <sup>45</sup> , Ser <sup>46</sup> , Met <sup>49</sup> , Asn <sup>142</sup> , Gly <sup>143</sup> , His <sup>164</sup> , Met <sup>165</sup> , Glu <sup>166</sup> , Leu <sup>167</sup> , Pro <sup>168</sup> , Arg <sup>188</sup> , Gln <sup>189</sup> , Thr <sup>190</sup> , Gln <sup>192</sup> |
|     |             |            | Papain like protease (PLPro)        | -9.55          | 0.1                   | Leu <sup>162</sup> , Gly <sup>163</sup> , Asp <sup>164</sup> , Val <sup>165</sup> , Pro <sup>247</sup> , Pro <sup>248</sup> , Tyr <sup>264</sup> , Gly <sup>266</sup> , Asn <sup>267</sup> , Tyr <sup>268</sup> , Tyr <sup>273</sup> , Thr <sup>301</sup>                                                                                                                                            |
|     |             |            | RNA-dependent RNA polymerase (RdRP) | -7.54          | 3                     | Tyr <sup>32</sup> , Ala <sup>46</sup> , Lys <sup>47</sup> , Tyr <sup>129</sup> , His <sup>133</sup> , Phe <sup>134</sup> , Asp <sup>135</sup> , Asn <sup>138</sup> , Ala <sup>706</sup> , Ser <sup>709</sup> , Thr <sup>710</sup> , Asp <sup>711</sup> , Lys <sup>714</sup> , Gln <sup>773</sup> , Gly <sup>774</sup> , Lys <sup>780</sup> , Asn <sup>781</sup> , Ser <sup>784</sup>                 |
|     |             |            | Helicase                            | -7.69          | 2.319                 | Ala <sup>4</sup> , Val <sup>6</sup> , Arg <sup>15</sup> , Arg <sup>21</sup> , Arg <sup>22</sup> , Pro <sup>23</sup> , Phe <sup>24</sup> , Arg <sup>129</sup> , Leu <sup>132</sup> , Phe <sup>133</sup> , Glu <sup>136</sup> , Pro <sup>234</sup> , Leu <sup>235</sup> , Ser <sup>236</sup>                                                                                                           |

| Sr. | Ligands      | PubChem ID | Proteins                            | Binding energy | Dissociation Constant | Active site residues                                                                                                                                                                                                                                                                                                                                               |
|-----|--------------|------------|-------------------------------------|----------------|-----------------------|--------------------------------------------------------------------------------------------------------------------------------------------------------------------------------------------------------------------------------------------------------------------------------------------------------------------------------------------------------------------|
|     |              |            |                                     | (kcal/mol)     | ( $\mu$ M)            |                                                                                                                                                                                                                                                                                                                                                                    |
|     |              |            | E-channel proteins                  | -8.52          | 0.57                  | Phe <sup>23</sup> , Phe <sup>26</sup> , Leu <sup>27</sup> , Thr <sup>30</sup> , Ile <sup>46</sup> , Leu <sup>51</sup> , Pro <sup>54</sup> , Tyr <sup>57</sup>                                                                                                                                                                                                      |
|     |              |            | Spike Open Protein                  | -6.79          | 10.63                 | Arg <sup>44</sup> , His <sup>49</sup> , Met <sup>740</sup> , Tyr <sup>741</sup> , Ile <sup>742</sup> , Gly <sup>744</sup> , Asn <sup>856</sup> , Val <sup>963</sup> , Lys <sup>964</sup> , Leu <sup>966</sup> , Ser <sup>967</sup> , Ser <sup>975</sup> , Val <sup>976</sup> , Leu <sup>977</sup> , Asn <sup>978</sup> , Arg <sup>1000</sup>                       |
|     |              |            | Spike Close Protein                 | -6.83          | 9.85                  | Gly <sup>908</sup> , Ile <sup>909</sup> , Gly <sup>910</sup> , Ser <sup>1037</sup> , Lys <sup>1038</sup> , Val <sup>1040</sup> , Asp <sup>1041</sup> , Lys <sup>1045</sup> , Gly <sup>1046</sup> , Tyr <sup>1047</sup> , His <sup>1048</sup> , Arg <sup>1107</sup> , Asn <sup>1108</sup>                                                                           |
| 37  | Behenic acid | 8215       | Main Protease (MPro)                | -4.12          | 959.84                | Arg <sup>131</sup> , Thr <sup>199</sup> , Tyr <sup>237</sup> , Tyr <sup>239</sup> , Leu <sup>271</sup> , Leu <sup>272</sup> , Gly <sup>275</sup> , Met <sup>276</sup> , Asn <sup>277</sup> , Ala <sup>285</sup> , Leu <sup>286</sup> , Leu <sup>287</sup> , Glu <sup>288</sup> , Asp <sup>289</sup>                                                                |
|     |              |            | Papain like protease (PLPro)        | -5.6           | 78.02                 | Asp <sup>164</sup> , Arg <sup>166</sup> , Met <sup>208</sup> , Pro <sup>247</sup> , Pro <sup>248</sup> , Tyr <sup>264</sup> , Gly <sup>266</sup> , Asn <sup>267</sup> , Tyr <sup>268</sup> , Tyr <sup>273</sup> , Thr <sup>301</sup>                                                                                                                               |
|     |              |            | RNA-dependent RNA polymerase (RdRP) | -4.19          | 854.32                | His <sup>613</sup> , Phe <sup>766</sup> , Ser <sup>768</sup> , Ala <sup>771</sup> , Ser <sup>772</sup> , Gln <sup>773</sup> , Gly <sup>774</sup> , Ser <sup>778</sup> , Ile <sup>779</sup> , Lys <sup>780</sup> , Glu <sup>796</sup> , Cys <sup>799</sup> , Thr <sup>801</sup> , Thr <sup>803</sup>                                                                |
|     |              |            | Helicase                            | -4.51          | 493.62                | Gly <sup>3</sup> , Ala <sup>4</sup> , Val <sup>6</sup> , Arg <sup>21</sup> , Arg <sup>22</sup> , Pro <sup>23</sup> , Phe <sup>24</sup> , Arg <sup>129</sup> , Leu <sup>132</sup> , Phe <sup>133</sup> , Glu <sup>136</sup> , Pro <sup>234</sup> , Leu <sup>235</sup> , Ser <sup>236</sup>                                                                          |
|     |              |            | E-channel proteins                  | -5.55          | 86.05                 | No binding site was found                                                                                                                                                                                                                                                                                                                                          |
|     |              |            | Spike Open Protein                  | -3.21          | 4414.08               | Arg <sup>355</sup> , Asn <sup>394</sup> , Tyr <sup>396</sup> , Pro <sup>426</sup> , Asp <sup>428</sup> , Phe <sup>429</sup> , Thr <sup>430</sup> , Pro <sup>463</sup> , Phe <sup>464</sup> , Ser <sup>514</sup> , Phe <sup>515</sup> , Glu <sup>516</sup> , Leu <sup>518</sup>                                                                                     |
|     |              |            | Spike Close Protein                 | -5.15          | 168.16                | Leu <sup>335</sup> , Cys <sup>336</sup> , Phe <sup>338</sup> , Gly <sup>339</sup> , Phe <sup>342</sup> , Asn <sup>343</sup> , Val <sup>362</sup> , Ala <sup>363</sup> , Asp <sup>364</sup> , Val <sup>367</sup> , Leu <sup>368</sup> , Ser <sup>371</sup> , Ser <sup>373</sup> , Phe <sup>374</sup> , Trp <sup>436</sup> , Asn <sup>437</sup> , Leu <sup>441</sup> |
| 38  | Benzoic acid | 243        | Main Protease (MPro)                | -5.93          | 45.23                 | Met <sup>6</sup> , Ala <sup>7</sup> , Phe <sup>8</sup> , Pro <sup>9</sup> , Thr <sup>111</sup> , Gln <sup>127</sup> , Asp <sup>295</sup> , Arg <sup>298</sup> , Gln <sup>299</sup> , Val <sup>303</sup>                                                                                                                                                            |
|     |              |            | Papain like protease (PLPro)        | -6.11          | 33.44                 | No binding site was found                                                                                                                                                                                                                                                                                                                                          |
|     |              |            | RNA-dependent RNA polymerase (RdRP) | -6.48          | 17.67                 | No binding site was found                                                                                                                                                                                                                                                                                                                                          |
|     |              |            | Helicase                            | -6.02          | 38.531                | Tyr <sup>120</sup> , Ala <sup>123</sup> , Asn <sup>124</sup> , Lys <sup>131</sup> , Ala <sup>134</sup> , Ala <sup>135</sup> , Leu <sup>138</sup> , Thr <sup>380</sup> , Asn <sup>381</sup> , Tyr <sup>382</sup> , Arg <sup>409</sup> , Leu <sup>417</sup> , Tyr <sup>421</sup> , Phe <sup>422</sup>                                                                |
|     |              |            | E-channel proteins                  | -5.57          | 83.05                 | Leu <sup>51</sup> , Pro <sup>54</sup> , Tyr <sup>57</sup>                                                                                                                                                                                                                                                                                                          |

| Sr. | Ligands   | PubChem ID | Proteins                            | Binding energy | Dissociation Constant | Active site residues                                                                                                                                                                                                                                                                                                                                                                                    |
|-----|-----------|------------|-------------------------------------|----------------|-----------------------|---------------------------------------------------------------------------------------------------------------------------------------------------------------------------------------------------------------------------------------------------------------------------------------------------------------------------------------------------------------------------------------------------------|
|     |           |            |                                     | (kcal/mol)     | ( $\mu$ M)            |                                                                                                                                                                                                                                                                                                                                                                                                         |
|     |           |            | Spike Open Protein                  | -5             | 215.52                | Met <sup>740</sup> , Tyr <sup>741</sup> , Ile <sup>742</sup> , Cys <sup>743</sup> , Gly <sup>744</sup> , Asn <sup>856</sup> , Leu <sup>966</sup> , Ser <sup>975</sup> , Val <sup>976</sup> , Leu <sup>977</sup> , Asn <sup>978</sup> , Arg <sup>1000</sup>                                                                                                                                              |
|     |           |            | Spike Close Protein                 | -5.82          | 53.91                 | Tyr <sup>38</sup> , Asp <sup>40</sup> , Lys <sup>41</sup> , Val <sup>42</sup> , Phe <sup>43</sup> , Arg <sup>44</sup> , Glu <sup>224</sup> , Pro <sup>225</sup> , Tyr <sup>279</sup> , Gly <sup>283</sup>                                                                                                                                                                                               |
| 39  | Biochanin | 5280373    | Main Protease (MPro)                | -6.85          | 9.59                  | Thr <sup>25</sup> , Thr <sup>26</sup> , Leu <sup>27</sup> , His <sup>41</sup> , Met <sup>49</sup> , Leu <sup>141</sup> , Asn <sup>142</sup> , Gly <sup>143</sup> , Ser <sup>144</sup> , Cys <sup>145</sup> , His <sup>164</sup> , Met <sup>165</sup> , Glu <sup>166</sup> , Leu <sup>167</sup> , Pro <sup>168</sup> , Arg <sup>188</sup> , Gln <sup>189</sup> , Thr <sup>190</sup> , Gln <sup>192</sup> |
|     |           |            | Papain like protease (PLPro)        | -9.04          | 0.24                  | Thr <sup>74</sup> , Asp <sup>76</sup> , Phe <sup>79</sup> , Arg <sup>82</sup> , Ala <sup>153</sup> , Tyr <sup>154</sup> , Asn <sup>156</sup> , Tyr <sup>171</sup> , Gln <sup>174</sup> , His <sup>175</sup>                                                                                                                                                                                             |
|     |           |            | RNA-dependent RNA polymerase (RdRP) | -7.51          | 3.12                  | Arg <sup>33</sup> , Phe <sup>35</sup> , Asp <sup>36</sup> , Ile <sup>37</sup> , Tyr <sup>38</sup> , Lys <sup>50</sup> , Val <sup>71</sup> , Lys <sup>73</sup> , Thr <sup>123</sup> , Thr <sup>206</sup> , Asp <sup>208</sup> , Asn <sup>209</sup> , Tyr <sup>217</sup> , Asp <sup>218</sup> , Asp <sup>221</sup>                                                                                        |
|     |           |            | Helicase                            | -7.31          | 4.397                 | Asn <sup>177</sup> , Asn <sup>179</sup> , Glu <sup>201</sup> , Pro <sup>514</sup> , Tyr <sup>515</sup> , Asn <sup>516</sup> , Asn <sup>519</sup> , Ala <sup>520</sup> , Thr <sup>530</sup> , Thr <sup>532</sup> , Val <sup>533</sup> , Asp <sup>534</sup> , Arg <sup>560</sup>                                                                                                                          |
|     |           |            | E-channel proteins                  | -6.81          | 10.19                 | No binding site was found                                                                                                                                                                                                                                                                                                                                                                               |
|     |           |            | Spike Open Protein                  | -6.29          | 24.59                 | Tyr <sup>38</sup> , Lys <sup>41</sup> , Val <sup>42</sup> , Phe <sup>43</sup> , Arg <sup>44</sup> , Glu <sup>224</sup> , Pro <sup>225</sup> , Leu <sup>226</sup> , Gly <sup>283</sup>                                                                                                                                                                                                                   |
|     |           |            | Spike Close Protein                 | -6.78          | 10.77                 | Phe <sup>329</sup> , Pro <sup>330</sup> , Asn <sup>331</sup> , Thr <sup>333</sup> , Leu <sup>335</sup> , Val <sup>362</sup> , Asp <sup>364</sup> , Cys <sup>525</sup> , Gly <sup>526</sup> , Pro <sup>527</sup> , Lys <sup>528</sup> , Lys <sup>529</sup> , Ser <sup>530</sup> , Gln <sup>580</sup>                                                                                                     |
| 40  | Butein    | 5281222    | Main Protease (MPro)                | -7.74          | 2.14                  | Phe <sup>3</sup> , Met <sup>6</sup> , Ala <sup>7</sup> , Phe <sup>8</sup> , Pro <sup>9</sup> , Gln <sup>127</sup> , Ile <sup>152</sup> , Phe <sup>291</sup> , Asp <sup>295</sup> , Arg <sup>298</sup> , Gln <sup>299</sup> , Val <sup>303</sup> , Thr <sup>304</sup>                                                                                                                                    |
|     |           |            | Papain like protease (PLPro)        | -7.76          | 2.04                  | Pro <sup>59</sup> , Asp <sup>62</sup> , Arg <sup>65</sup> , Val <sup>66</sup> , Ala <sup>68</sup> , Phe <sup>69</sup> , Tyr <sup>72</sup> , Thr <sup>74</sup> , Thr <sup>75</sup> , Asp <sup>76</sup> , Pro <sup>77</sup> , Phe <sup>79</sup> , Leu <sup>80</sup>                                                                                                                                       |
|     |           |            | RNA-dependent RNA polymerase (RdRP) | -7.39          | 3.83                  | Lys <sup>411</sup> , Pro <sup>412</sup> , Gly <sup>413</sup> , Asn <sup>414</sup> , Tyr <sup>546</sup> , Asp <sup>845</sup> , Asp <sup>846</sup> , Ile <sup>847</sup>                                                                                                                                                                                                                                   |
|     |           |            | Helicase                            | -7.09          | 6.342                 | Pro <sup>175</sup> , Asn <sup>177</sup> , Asn <sup>179</sup> , Tyr <sup>180</sup> , Pro <sup>406</sup> , Ala <sup>407</sup> , Pro <sup>408</sup> , Arg <sup>409</sup> , Thr <sup>410</sup> , Leu <sup>412</sup> , Thr <sup>413</sup> , Thr <sup>416</sup> , Leu <sup>417</sup> , Phe <sup>422</sup> , Asn <sup>557</sup> , Arg <sup>560</sup>                                                           |
|     |           |            | E-channel proteins                  | -7.28          | 4.64                  | No binding site was found                                                                                                                                                                                                                                                                                                                                                                               |

| Sr. | Ligands       | PubChem ID | Proteins                            | Binding energy | Dissociation Constant | Active site residues                                                                                                                                                                                                                                                                                                                         |
|-----|---------------|------------|-------------------------------------|----------------|-----------------------|----------------------------------------------------------------------------------------------------------------------------------------------------------------------------------------------------------------------------------------------------------------------------------------------------------------------------------------------|
|     |               |            |                                     | (kcal/mol)     | ( $\mu$ M)            |                                                                                                                                                                                                                                                                                                                                              |
|     |               |            | Spike Open Protein                  | -6.77          | 10.88                 | Arg <sup>355</sup> , Tyr <sup>396</sup> , Pro <sup>426</sup> , Asp <sup>428</sup> , Phe <sup>429</sup> , Thr <sup>430</sup> , Phe <sup>464</sup> , Ser <sup>514</sup> , Phe <sup>515</sup> , Glu <sup>516</sup> , Leu <sup>517</sup> , Leu <sup>518</sup>                                                                                    |
|     |               |            | Spike Close Protein                 | -7.57          | 2.81                  | Tyr <sup>789</sup> , Lys <sup>790</sup> , Thr <sup>791</sup> , Pro <sup>792</sup> , Asp <sup>796</sup> , Phe <sup>797</sup> , Ala <sup>879</sup> , Ile <sup>882</sup> , Thr <sup>883</sup> , Ala <sup>893</sup> , Gln <sup>895</sup> , Ile <sup>896</sup> , Pro <sup>897</sup> , Phe <sup>898</sup>                                          |
| 41  | Caffeic acid  | 689043     | Main Protease (MPro)                | -7.09          | 6.4                   | Phe <sup>3</sup> , Met <sup>6</sup> , Phe <sup>8</sup> , Gln <sup>127</sup> , Phe <sup>291</sup> , Asp <sup>295</sup> , Arg <sup>298</sup> , Gln <sup>299</sup> , Gly <sup>302</sup> , Val <sup>303</sup>                                                                                                                                    |
|     |               |            | Papain like protease (PLPro)        | -7.28          | 4.59                  | His <sup>73</sup> , Thr <sup>74</sup> , Thr <sup>75</sup> , Gln <sup>174</sup> , His <sup>175</sup>                                                                                                                                                                                                                                          |
|     |               |            | RNA-dependent RNA polymerase (RdRP) | -6.76          | 11.13                 | Ser <sup>592</sup> , Lys <sup>593</sup> , Phe <sup>594</sup> , Gln <sup>815</sup> , Pro <sup>830</sup> , Tyr <sup>831</sup> , Pro <sup>832</sup> , Ile <sup>864</sup> , Asp <sup>865</sup> , Ala <sup>866</sup> , Pro <sup>868</sup> , Trp <sup>916</sup>                                                                                    |
|     |               |            | Helicase                            | -7.15          | 5.731                 | Tyr <sup>120</sup> , Ala <sup>123</sup> , Asn <sup>124</sup> , Ala <sup>135</sup> , Leu <sup>138</sup> , Lys <sup>139</sup> , Thr <sup>380</sup> , Asn <sup>381</sup> , Tyr <sup>382</sup> , Arg <sup>409</sup> , Leu <sup>417</sup> , Tyr <sup>421</sup> , Phe <sup>422</sup>                                                               |
|     |               |            | E-channel proteins                  | -6.39          | 20.77                 | No binding site was found                                                                                                                                                                                                                                                                                                                    |
|     |               |            | Spike Open Protein                  | -6.65          | 13.37                 | Tyr <sup>38</sup> , Asp <sup>40</sup> , Lys <sup>41</sup> , Val <sup>42</sup> , Phe <sup>43</sup> , Glu <sup>224</sup> , Pro <sup>225</sup> , Asn <sup>282</sup> , Gly <sup>283</sup> , Thr <sup>284</sup>                                                                                                                                   |
|     |               |            | Spike Close Protein                 | -6.69          | 12.58                 | Tyr <sup>38</sup> , Asp <sup>40</sup> , Lys <sup>41</sup> , Val <sup>42</sup> , Phe <sup>43</sup> , Arg <sup>44</sup> , Glu <sup>224</sup> , Pro <sup>225</sup> , Tyr <sup>279</sup> , Asn <sup>282</sup> , Gly <sup>283</sup> , Thr <sup>284</sup>                                                                                          |
| 42  | Cinnamic acid | 444539     | Main Protease (MPro)                | -6.44          | 19.09                 | Phe <sup>3</sup> , Lys <sup>5</sup> , Met <sup>6</sup> , Phe <sup>8</sup> , Pro <sup>9</sup> , Gln <sup>127</sup> , Phe <sup>291</sup> , Asp <sup>295</sup> , Arg <sup>298</sup> , Gln <sup>299</sup> , Gly <sup>302</sup> , Val <sup>303</sup> , Thr <sup>304</sup>                                                                         |
|     |               |            | Papain like protease (PLPro)        | -6.81          | 10.26                 | Lys <sup>157</sup> , Leu <sup>162</sup> , Gly <sup>163</sup> , Asp <sup>164</sup> , Val <sup>165</sup> , Pro <sup>248</sup> , Tyr <sup>264</sup> , Tyr <sup>268</sup> , Tyr <sup>273</sup> , Thr <sup>301</sup>                                                                                                                              |
|     |               |            | RNA-dependent RNA polymerase (RdRP) | -6.23          | 27.17                 | Pro <sup>323</sup> , Thr <sup>324</sup> , Phe <sup>326</sup> , Gly <sup>327</sup> , Tyr <sup>346</sup> , His <sup>347</sup> , Phe <sup>348</sup> , Arg <sup>349</sup> , Glu <sup>350</sup> , Phe <sup>396</sup> , Asn <sup>628</sup> , Ser <sup>664</sup> , Val <sup>675</sup> , Lys <sup>676</sup> , Pro <sup>677</sup> basn <sup>118</sup> |
|     |               |            | Helicase                            | -6.24          | 26.535                | Pro <sup>406</sup> , Ala <sup>407</sup> , Arg <sup>409</sup> , Leu <sup>412</sup> , Thr <sup>416</sup> , Leu <sup>417</sup> , Pro <sup>419</sup> , Phe <sup>422</sup> , Asn <sup>557</sup> , Asn <sup>559</sup> , Arg <sup>560</sup>                                                                                                         |
|     |               |            | E-channel proteins                  | -6.41          | 19.92                 | No binding site was found                                                                                                                                                                                                                                                                                                                    |

| Sr. | Ligands                | PubChem ID | Proteins                            | Binding energy | Dissociation Constant | Active site residues                                                                                                                                                                                                                                                                                                                          |
|-----|------------------------|------------|-------------------------------------|----------------|-----------------------|-----------------------------------------------------------------------------------------------------------------------------------------------------------------------------------------------------------------------------------------------------------------------------------------------------------------------------------------------|
|     |                        |            |                                     | (kcal/mol)     | ( $\mu$ M)            |                                                                                                                                                                                                                                                                                                                                               |
|     |                        |            | Spike Open Protein                  | -6.19          | 29.21                 | Tyr <sup>38</sup> , Asp <sup>40</sup> , Lys <sup>41</sup> , Val <sup>42</sup> , Phe <sup>43</sup> , Arg <sup>44</sup> , Glu <sup>224</sup> , Pro <sup>225</sup> , Tyr <sup>279</sup> , Gly <sup>283</sup>                                                                                                                                     |
|     |                        |            | Spike Close Protein                 | -6.15          | 30.94                 | Trp <sup>104</sup> , Ile <sup>119</sup> , Asn <sup>121</sup> , Val <sup>126</sup> , Ile <sup>128</sup> , Arg <sup>190</sup> , Phe <sup>192</sup> , Phe <sup>194</sup> , Ile <sup>203</sup> , Val <sup>227</sup>                                                                                                                               |
| 43  | Citric acid            | 311        | Main Protease (MPro)                | -5.24          | 145.44                | Phe <sup>8</sup> , Ile <sup>106</sup> , Gln <sup>110</sup> , Thr <sup>111</sup> , Asn <sup>151</sup> , Ile <sup>152</sup> , Asp <sup>153</sup> , Thr <sup>292</sup> , Phe <sup>294</sup> , Asp <sup>295</sup> , Arg <sup>298</sup>                                                                                                            |
|     |                        |            | Papain like protease (PLPro)        | -6.18          | 29.36                 | His <sup>73</sup> , Thr <sup>74</sup> , Thr <sup>75</sup> , Asp <sup>76</sup> , Phe <sup>79</sup> , Arg <sup>82</sup> , Ala <sup>153</sup> , Tyr <sup>154</sup> , Asn <sup>156</sup> , Tyr <sup>171</sup> , Gln <sup>174</sup> , His <sup>175</sup>                                                                                           |
|     |                        |            | RNA-dependent RNA polymerase (RdRP) | -5.34          | 122.03                | Lys <sup>593</sup> , Phe <sup>594</sup> , Gln <sup>815</sup> , Pro <sup>830</sup> , Tyr <sup>831</sup> , Pro <sup>832</sup> , Asp <sup>865</sup> , Pro <sup>868</sup> , Trp <sup>916</sup>                                                                                                                                                    |
|     |                        |            | Helicase                            | -5.74          | 61.706                | Leu <sup>405</sup> , Pro <sup>406</sup> , Thr <sup>416</sup> , Leu <sup>417</sup> , Pro <sup>419</sup> , Phe <sup>422</sup> , Asn <sup>557</sup> , Asn <sup>559</sup> , Arg <sup>560</sup>                                                                                                                                                    |
|     |                        |            | E-channel proteins                  | -4.83          | 286.66                | No binding site was found                                                                                                                                                                                                                                                                                                                     |
|     |                        |            | Spike Open Protein                  | -5.27          | 138.26                | Met <sup>740</sup> , Tyr <sup>741</sup> , Ile <sup>742</sup> , Cys <sup>743</sup> , Gly <sup>744</sup> , Asn <sup>856</sup> , Leu <sup>966</sup> , Ser <sup>975</sup> , Val <sup>976</sup> , Leu <sup>977</sup> , Asn <sup>978</sup> , Arg <sup>1000</sup>                                                                                    |
|     |                        |            | Spike Close Protein                 | -5.71          | 64.8                  | Phe <sup>329</sup> , Pro <sup>330</sup> , Asn <sup>331</sup> , Ile <sup>332</sup> , Thr <sup>333</sup> , Val <sup>362</sup> , Cys <sup>525</sup> , Gly <sup>526</sup> , Pro <sup>527</sup> , Lys <sup>528</sup> , Lys <sup>529</sup> , Ser <sup>530</sup> , Gln <sup>580</sup>                                                                |
| 44  | Cryptochlorogenic acid | 9798666    | Main Protease (MPro)                | -7.99          | 1.4                   | Arg <sup>131</sup> , Lys <sup>137</sup> , Asp <sup>197</sup> , Thr <sup>198</sup> , Thr <sup>199</sup> , Tyr <sup>239</sup> , Leu <sup>271</sup> , Leu <sup>272</sup> , Gly <sup>275</sup> , Met <sup>276</sup> , Ala <sup>285</sup> , Leu <sup>286</sup> , Leu <sup>287</sup> , Asp <sup>289</sup> , Glu <sup>290</sup>                      |
|     |                        |            | Papain like protease (PLPro)        | -9.25          | 0.16                  | Arg <sup>166</sup> , Ser <sup>170</sup> , Val <sup>202</sup> , Glu <sup>203</sup> , Met <sup>206</sup> , Tyr <sup>207</sup> , Met <sup>208</sup>                                                                                                                                                                                              |
|     |                        |            | RNA-dependent RNA polymerase (RdRP) | -7.39          | 3.82                  | Tyr <sup>149</sup> , Cys <sup>151</sup> , Ala <sup>176</sup> , Asn <sup>177</sup> , Leu <sup>178</sup> , Gly <sup>179</sup> , Glu <sup>180</sup> , Arg <sup>181</sup> , Gln <sup>184</sup> , Arg <sup>249</sup> , Thr <sup>252</sup> , Leu <sup>261</sup>                                                                                     |
|     |                        |            | Helicase                            | -7.95          | 1.501                 | Pro <sup>175</sup> , Asn <sup>177</sup> , Asn <sup>179</sup> , Tyr <sup>180</sup> , Pro <sup>406</sup> , Pro <sup>408</sup> , Arg <sup>409</sup> , Thr <sup>410</sup> , Leu <sup>412</sup> , Thr <sup>413</sup> , Leu <sup>417</sup> , Pro <sup>419</sup> , Phe <sup>422</sup> , Asn <sup>557</sup> , Asn <sup>559</sup> , Arg <sup>560</sup> |
|     |                        |            | E-channel proteins                  | -7.52          | 3.08                  | Ile <sup>46</sup> , Leu <sup>51</sup> , Pro <sup>54</sup> , Phe <sup>56</sup> , Tyr <sup>57</sup> , Ser <sup>60</sup> , Arg <sup>61</sup>                                                                                                                                                                                                     |

| Sr. | Ligands            | PubChem ID | Proteins                            | Binding energy | Dissociation Constant | Active site residues                                                                                                                                                                                                                                                                                                                                               |
|-----|--------------------|------------|-------------------------------------|----------------|-----------------------|--------------------------------------------------------------------------------------------------------------------------------------------------------------------------------------------------------------------------------------------------------------------------------------------------------------------------------------------------------------------|
|     |                    |            |                                     | (kcal/mol)     | ( $\mu$ M)            |                                                                                                                                                                                                                                                                                                                                                                    |
|     |                    |            | Spike Open Protein                  | -7.26          | 4.81                  | Met <sup>740</sup> , Tyr <sup>741</sup> , Ile <sup>742</sup> , Cys <sup>743</sup> , Gly <sup>744</sup> , Asn <sup>856</sup> , Val <sup>963</sup> , Lys <sup>964</sup> , Leu <sup>966</sup> , Ser <sup>967</sup> , Ser <sup>975</sup> , Val <sup>976</sup> , Leu <sup>977</sup> , Asn <sup>978</sup> , Arg <sup>1000</sup>                                          |
|     |                    |            | Spike Close Protein                 | -7.14          | 5.8                   | Gly <sup>908</sup> , Ile <sup>909</sup> , Gly <sup>910</sup> , Gln <sup>1036</sup> , Ser <sup>1037</sup> , Lys <sup>1038</sup> , Val <sup>1040</sup> , Gly <sup>1046</sup> , Tyr <sup>1047</sup> , His <sup>1048</sup> , Glu <sup>1092</sup> , Gly <sup>1093</sup> , Gln <sup>1106</sup> , Arg <sup>1107</sup> , Asn <sup>1108</sup>                               |
| 45  | curcumin           | 969516     | Main Protease (MPro)                | -7.28          | 4.62                  | Lys <sup>5</sup> , Arg <sup>131</sup> , Lys <sup>137</sup> , Thr <sup>199</sup> , Tyr <sup>237</sup> , Tyr <sup>239</sup> , Leu <sup>271</sup> , Leu <sup>272</sup> , Met <sup>276</sup> , Ala <sup>285</sup> , Leu <sup>286</sup> , Leu <sup>287</sup> , Glu <sup>288</sup> , Asp <sup>289</sup> , Glu <sup>290</sup>                                             |
|     |                    |            | Papain like protease (PLPro)        | -9.09          | 0.22                  | Asp <sup>164</sup> , Arg <sup>166</sup> , Met <sup>208</sup> , Ala <sup>246</sup> , Pro <sup>247</sup> , Pro <sup>248</sup> , Tyr <sup>264</sup> , Tyr <sup>268</sup> , Tyr <sup>273</sup> , Thr <sup>301</sup>                                                                                                                                                    |
|     |                    |            | RNA-dependent RNA polymerase (RdRP) | -7.3           | 4.46                  | Tyr <sup>32</sup> , Lys <sup>47</sup> , Tyr <sup>122</sup> , Tyr <sup>129</sup> , Ala <sup>130</sup> , His <sup>133</sup> , Phe <sup>134</sup> , Asn <sup>138</sup> , Cys <sup>139</sup> , Asp <sup>140</sup> , Thr <sup>141</sup> , Leu <sup>142</sup>                                                                                                            |
|     |                    |            | Helicase                            | -7.4           | 3.79                  | Leu <sup>176</sup> , Asn <sup>177</sup> , Arg <sup>178</sup> , Thr <sup>199</sup> , Phe <sup>200</sup> , Glu <sup>201</sup> , Lys <sup>202</sup> , Gly <sup>203</sup> , Arg <sup>212</sup> , Asn <sup>516</sup> , Ser <sup>517</sup> , Asn <sup>519</sup> , Ala <sup>520</sup> , Thr <sup>530</sup> , Gln <sup>531</sup> , Thr <sup>532</sup> , Asp <sup>534</sup> |
|     |                    |            | E-channel proteins                  | -8.27          | 0.87                  | Ile <sup>46</sup> , Ser <sup>50</sup> , Leu <sup>51</sup> , Pro <sup>54</sup> , Phe <sup>56</sup> , Tyr <sup>57</sup> , Ser <sup>60</sup>                                                                                                                                                                                                                          |
|     |                    |            | Spike Open Protein                  | -6.63          | 13.93                 | Ile <sup>105</sup> , Leu <sup>118</sup> , Val <sup>120</sup> , Asn <sup>122</sup> , Ala <sup>123</sup> , Asn <sup>125</sup> , Val <sup>127</sup> , Lys <sup>129</sup> , Phe <sup>135</sup> , Cys <sup>136</sup> , Pro <sup>139</sup> , Phe <sup>140</sup> , Leu <sup>141</sup> , Val <sup>171</sup> , Leu <sup>241</sup>                                           |
|     |                    |            | Spike Close Protein                 | -7.32          | 4.29                  | Asn <sup>99</sup> , Ile <sup>101</sup> , Arg <sup>102</sup> , Gly <sup>103</sup> , Trp <sup>104</sup> , Ile <sup>119</sup> , Asn <sup>121</sup> , Val <sup>126</sup> , Ile <sup>128</sup> , Tyr <sup>170</sup> , Ser <sup>172</sup> , Arg <sup>190</sup> , Phe <sup>192</sup> , Phe <sup>194</sup> , Ile <sup>203</sup> , Leu <sup>226</sup> , Val <sup>227</sup>  |
| 46  | Eicosadienoic acid | 6439848    | Main Protease (MPro)                | -4.84          | 282.81                | Arg <sup>131</sup> , Thr <sup>199</sup> , Tyr <sup>237</sup> , Asn <sup>238</sup> , Tyr <sup>239</sup> , Leu <sup>271</sup> , Leu <sup>272</sup> , Gly <sup>275</sup> , Met <sup>276</sup> , Ala <sup>285</sup> , Leu <sup>286</sup> , Leu <sup>287</sup> , Glu <sup>288</sup> , Asp <sup>289</sup>                                                                |
|     |                    |            | Papain like protease (PLPro)        | -6.34          | 22.45                 | Asp <sup>164</sup> , Arg <sup>166</sup> , Met <sup>208</sup> , Pro <sup>247</sup> , Pro <sup>248</sup> , Tyr <sup>264</sup> , Tyr <sup>268</sup> , Tyr <sup>273</sup> , Thr <sup>301</sup>                                                                                                                                                                         |
|     |                    |            | RNA-dependent RNA polymerase (RdRP) | -4.33          | 672.25                | Arg <sup>305</sup> , Glu <sup>474</sup> , Asp <sup>477</sup> , Lys <sup>478</sup> , Phe <sup>480</sup> , Asp <sup>481</sup> , Val <sup>637</sup> , Arg <sup>640</sup> , Lys <sup>641</sup> , Thr <sup>643</sup> , Val <sup>737</sup> , Thr <sup>739</sup> , Val <sup>742</sup> , Asn <sup>743</sup>                                                                |
|     |                    |            | Helicase                            | -5.06          | 194.762               | Val <sup>6</sup> , Arg <sup>15</sup> , Arg <sup>21</sup> , Arg <sup>22</sup> , Pro <sup>23</sup> , Phe <sup>24</sup> , Arg <sup>129</sup> , Leu <sup>132</sup> , Phe <sup>133</sup> , Glu <sup>136</sup> , Pro <sup>234</sup> , Leu <sup>235</sup> , Ser <sup>236</sup>                                                                                            |

| Sr. | Ligands      | PubChem ID | Proteins                            | Binding energy | Dissociation Constant | Active site residues                                                                                                                                                                                                                                                                                                                                                                                       |
|-----|--------------|------------|-------------------------------------|----------------|-----------------------|------------------------------------------------------------------------------------------------------------------------------------------------------------------------------------------------------------------------------------------------------------------------------------------------------------------------------------------------------------------------------------------------------------|
|     |              |            |                                     | (kcal/mol)     | ( $\mu$ M)            |                                                                                                                                                                                                                                                                                                                                                                                                            |
|     |              |            | E-channel proteins                  | -6.04          | 37.19                 | No binding site was found                                                                                                                                                                                                                                                                                                                                                                                  |
|     |              |            | Spike Open Protein                  | -4.37          | 630.49                | Ser <sup>730</sup> , Met <sup>731</sup> , Thr <sup>732</sup> , Lys <sup>733</sup> , Thr <sup>734</sup> , Val <sup>860</sup> , Leu <sup>861</sup> , Pro <sup>862</sup> , Pro <sup>863</sup> , Val <sup>952</sup> , Asn <sup>955</sup> , Ala <sup>956</sup> , Leu <sup>959</sup> , Asn <sup>960</sup> , His <sup>1058</sup>                                                                                  |
|     |              |            | Spike Close Protein                 | -6.17          | 29.86                 | Glu <sup>96</sup> , Asn <sup>99</sup> , Ile <sup>101</sup> , Arg <sup>102</sup> , Trp <sup>104</sup> , Ile <sup>119</sup> , Asn <sup>121</sup> , Val <sup>126</sup> , Ile <sup>128</sup> , Phe <sup>168</sup> , Tyr <sup>170</sup> , Ser <sup>172</sup> , Arg <sup>190</sup> , Phe <sup>192</sup> , Phe <sup>194</sup> , Ile <sup>203</sup> , Leu <sup>226</sup> , Val <sup>227</sup> , Leu <sup>229</sup> |
| 47  | Ellagic acid | 5281855    | Main Protease (MPro)                | -7.93          | 1.54                  | Phe <sup>8</sup> , Lys <sup>102</sup> , Val <sup>104</sup> , Ile <sup>106</sup> , Gln <sup>110</sup> , Thr <sup>111</sup> , Asn <sup>151</sup> , Ile <sup>152</sup> , Asp <sup>153</sup> , Ser <sup>158</sup> , Thr <sup>292</sup> , Phe <sup>294</sup> , Asp <sup>295</sup> , Arg <sup>298</sup>                                                                                                          |
|     |              |            | Papain like protease (PLPro)        | -8.41          | 0.69                  | Lys <sup>157</sup> , Glu <sup>161</sup> , Leu <sup>162</sup>                                                                                                                                                                                                                                                                                                                                               |
|     |              |            | RNA-dependent RNA polymerase (RdRP) | -7.59          | 2.72                  | Lys <sup>47</sup> , Tyr <sup>129</sup> , His <sup>133</sup> , Phe <sup>134</sup> , Asp <sup>135</sup> , Asn <sup>138</sup> , Ala <sup>706</sup> , Ser <sup>709</sup> , Thr <sup>710</sup> , Asp <sup>711</sup> , Lys <sup>780</sup> , Asn <sup>781</sup> , Ser <sup>784</sup>                                                                                                                              |
|     |              |            | Helicase                            | -8.08          | 1.189                 | Pro <sup>406</sup> , Pro <sup>408</sup> , Arg <sup>409</sup> , Thr <sup>410</sup> , Leu <sup>412</sup> , Gly <sup>415</sup> , Thr <sup>416</sup> , Leu <sup>417</sup> , Asn <sup>557</sup> , Asn <sup>559</sup> , Arg <sup>560</sup>                                                                                                                                                                       |
|     |              |            | E-channel proteins                  | -6.77          | 10.98                 | Leu <sup>28</sup> , Val <sup>29</sup> , Ala <sup>32</sup> , Ile <sup>33</sup>                                                                                                                                                                                                                                                                                                                              |
|     |              |            | Spike Open Protein                  | -8.1           | 1.16                  | Ser <sup>730</sup> , Met <sup>731</sup> , Thr <sup>732</sup> , Lys <sup>733</sup> , Gln <sup>774</sup> , Thr <sup>778</sup> , Phe <sup>823</sup> , Val <sup>860</sup> , Leu <sup>861</sup> , Pro <sup>862</sup> , Pro <sup>863</sup> , Asp <sup>867</sup> , Ile <sup>870</sup> , Ala <sup>1056</sup> , Pro <sup>1057</sup> , His <sup>1058</sup> , Gly <sup>1059</sup>                                     |
|     |              |            | Spike Close Protein                 | -7.41          | 3.71                  | Arg <sup>355</sup> , Tyr <sup>396</sup> , Pro <sup>426</sup> , Asp <sup>428</sup> , Phe <sup>429</sup> , Thr <sup>430</sup> , Pro <sup>463</sup> , Phe <sup>464</sup> , Ser <sup>514</sup> , Phe <sup>515</sup> , Glu <sup>516</sup>                                                                                                                                                                       |
| 48  | Epicatechin  | 72276      | Main Protease (MPro)                | -7.18          | 5.45                  | Arg <sup>131</sup> , Lys <sup>137</sup> , Asp <sup>197</sup> , Thr <sup>199</sup> , Val <sup>204</sup> , Tyr <sup>237</sup> , Asn <sup>238</sup> , Tyr <sup>239</sup> , Leu <sup>272</sup> , Leu <sup>286</sup> , Leu <sup>287</sup> , Glu <sup>288</sup> , Asp <sup>289</sup>                                                                                                                             |
|     |              |            | Papain like protease (PLPro)        | -9.28          | 0.16                  | Thr <sup>74</sup> , Thr <sup>75</sup> , Asp <sup>76</sup> , Tyr <sup>154</sup> , Tyr <sup>171</sup> , Gln <sup>174</sup> , His <sup>175</sup>                                                                                                                                                                                                                                                              |
|     |              |            | RNA-dependent RNA polymerase (RdRP) | -7.39          | 3.84                  | Gly <sup>590</sup> , Thr <sup>591</sup> , Ser <sup>592</sup> , Lys <sup>593</sup> , Phe <sup>594</sup> , Gln <sup>815</sup> , Pro <sup>830</sup> , Tyr <sup>831</sup> , Pro <sup>832</sup> , Asp <sup>865</sup> , Pro <sup>868</sup> , Trp <sup>916</sup>                                                                                                                                                  |
|     |              |            | Helicase                            | -7.22          | 5.127                 | Asn <sup>179</sup> , Pro <sup>406</sup> , Ala <sup>407</sup> , Pro <sup>408</sup> , Arg <sup>409</sup> , Thr <sup>410</sup> , Leu <sup>412</sup> , Thr <sup>416</sup> , Leu <sup>417</sup> , Glu <sup>418</sup> , Pro <sup>419</sup> , Phe <sup>422</sup> , Asn <sup>557</sup> , Asn <sup>559</sup> , Arg <sup>560</sup>                                                                                   |



| Sr. | Ligands             | PubChem ID | Proteins                            | Binding energy | Dissociation Constant | Active site residues                                                                                                                                                                                                                                                                                                                                                                                       |
|-----|---------------------|------------|-------------------------------------|----------------|-----------------------|------------------------------------------------------------------------------------------------------------------------------------------------------------------------------------------------------------------------------------------------------------------------------------------------------------------------------------------------------------------------------------------------------------|
|     |                     |            |                                     | (kcal/mol)     | ( $\mu$ M)            |                                                                                                                                                                                                                                                                                                                                                                                                            |
| 49  | Eriodictyol         | 440735     | E-channel proteins                  | -7.06          | 6.65                  | Ile <sup>46</sup> , Leu <sup>51</sup> , Pro <sup>54</sup> , Phe <sup>56</sup> , Tyr <sup>57</sup> , Ser <sup>60</sup>                                                                                                                                                                                                                                                                                      |
|     |                     |            | Spike Open Protein                  | -7.01          | 7.26                  | Tyr <sup>38</sup> , Pro <sup>39</sup> , Asp <sup>40</sup> , Lys <sup>41</sup> , Val <sup>42</sup> , Phe <sup>43</sup> , Arg <sup>44</sup> , Glu <sup>224</sup> , Pro <sup>225</sup> , Leu <sup>226</sup> , Tyr <sup>279</sup> , Gly <sup>283</sup>                                                                                                                                                         |
|     |                     |            | Spike Close Protein                 | -7.21          | 5.18                  | Asp <sup>420</sup> , Tyr <sup>421</sup> , Asn <sup>422</sup> , Tyr <sup>423</sup> , Lys <sup>424</sup> , Lys <sup>462</sup> , Phe <sup>464</sup> , Glu <sup>465</sup> , Arg <sup>466</sup> , Asp <sup>467</sup>                                                                                                                                                                                            |
|     |                     |            | Main Protease (MPro)                | -7.62          | 2.58                  | Met <sup>6</sup> , Ala <sup>7</sup> , Phe <sup>8</sup> , Pro <sup>9</sup> , Ser <sup>113</sup> , Gln <sup>127</sup> , Asp <sup>295</sup> , Arg <sup>298</sup> , Gln <sup>299</sup> , Gly <sup>302</sup> , Val <sup>303</sup> , Thr <sup>304</sup>                                                                                                                                                          |
|     |                     |            | Papain like protease (PLPro)        | -8.13          | 1.11                  | Arg <sup>183</sup> , Leu <sup>185</sup> , Val <sup>187</sup> , Thr <sup>197</sup> , Leu <sup>199</sup> , Glu <sup>203</sup> , Met <sup>206</sup> , Tyr <sup>207</sup> , Met <sup>208</sup> , Lys <sup>232</sup>                                                                                                                                                                                            |
|     |                     |            | RNA-dependent RNA polymerase (RdRP) | -7.61          | 2.65                  | Thr <sup>591</sup> , Ser <sup>592</sup> , Lys <sup>593</sup> , Phe <sup>594</sup> , Gln <sup>815</sup> , Pro <sup>830</sup> , Tyr <sup>831</sup> , Pro <sup>832</sup> , Asp <sup>865</sup> , Pro <sup>868</sup> , Trp <sup>916</sup>                                                                                                                                                                       |
|     |                     |            | Helicase                            | -7.77          | 2.03                  | Asn <sup>179</sup> , Tyr <sup>180</sup> , Leu <sup>405</sup> , Pro <sup>406</sup> , Pro <sup>408</sup> , Arg <sup>409</sup> , Thr <sup>410</sup> , Leu <sup>412</sup> , Thr <sup>413</sup> , Thr <sup>416</sup> , Leu <sup>417</sup> , Phe <sup>422</sup> , Asn <sup>557</sup> , Asn <sup>559</sup> , Arg <sup>560</sup>                                                                                   |
| 50  | Euchrestafavanone A | 484588     | E-channel proteins                  | -7.25          | 4.86                  | Ile <sup>46</sup> , Ser <sup>50</sup> , Leu <sup>51</sup> , Pro <sup>54</sup> , Phe <sup>56</sup> , Tyr <sup>57</sup>                                                                                                                                                                                                                                                                                      |
|     |                     |            | Spike Open Protein                  | -7.2           | 5.29                  | Met <sup>740</sup> , Tyr <sup>741</sup> , Ile <sup>742</sup> , Cys <sup>743</sup> , Gly <sup>744</sup> , Asn <sup>856</sup> , Leu <sup>966</sup> , Ser <sup>967</sup> , Ser <sup>975</sup> , Val <sup>976</sup> , Leu <sup>977</sup> , Asn <sup>978</sup> , Arg <sup>1000</sup>                                                                                                                            |
|     |                     |            | Spike Close Protein                 | -7             | 7.44                  | Ala <sup>958</sup> , Thr <sup>961</sup> , Leu <sup>962</sup> , Gln <sup>965</sup> , Phe <sup>970</sup> , Gly <sup>999</sup> , Gln <sup>1002</sup> , Ser <sup>1003</sup> , Thr <sup>1006</sup> , Tyr <sup>1007</sup> , Gln <sup>1010</sup>                                                                                                                                                                  |
|     |                     |            | Main Protease (MPro)                | -7.94          | 1.51                  | Ser <sup>46</sup> , Met <sup>49</sup> , Phe <sup>140</sup> , Leu <sup>141</sup> , Asn <sup>142</sup> , Gly <sup>143</sup> , Ser <sup>144</sup> , Cys <sup>145</sup> , His <sup>163</sup> , His <sup>164</sup> , Met <sup>165</sup> , Glu <sup>166</sup> , Leu <sup>167</sup> , Pro <sup>168</sup> , Arg <sup>188</sup> , Gln <sup>189</sup> , Thr <sup>190</sup> , Ala <sup>191</sup> , Gln <sup>192</sup> |
|     |                     |            | Papain like protease (PLPro)        | -9.95          | 0.05                  | Lys <sup>157</sup> , Glu <sup>161</sup> , Leu <sup>162</sup> , Gly <sup>163</sup> , Asp <sup>164</sup> , Arg <sup>166</sup> , Glu <sup>167</sup> , Ser <sup>170</sup> , Val <sup>202</sup> , Glu <sup>203</sup> , Met <sup>206</sup> , Tyr <sup>207</sup> , Met <sup>208</sup> , Tyr <sup>268</sup>                                                                                                        |
| 50  | Euchrestafavanone A | 484588     | RNA-dependent RNA polymerase (RdRP) | -8.25          | 0.9                   | Phe <sup>35</sup> , Asp <sup>36</sup> , Ile <sup>37</sup> , Tyr <sup>38</sup> , Asn <sup>39</sup> , Val <sup>42</sup> , Phe <sup>48</sup> , Leu <sup>49</sup> , Lys <sup>50</sup> , Thr <sup>206</sup> , Asp <sup>208</sup> , Asn <sup>209</sup> , Asp <sup>218</sup> , Asp <sup>221</sup> , Asn <sup>713</sup>                                                                                            |

| Sr. | Ligands      | PubChem ID | Proteins                            | Binding energy | Dissociation Constant | Active site residues                                                                                                                                                                                                                                                                                                                                                                                 |
|-----|--------------|------------|-------------------------------------|----------------|-----------------------|------------------------------------------------------------------------------------------------------------------------------------------------------------------------------------------------------------------------------------------------------------------------------------------------------------------------------------------------------------------------------------------------------|
|     |              |            |                                     | (kcal/mol)     | ( $\mu$ M)            |                                                                                                                                                                                                                                                                                                                                                                                                      |
|     |              |            | Helicase                            | -8.88          | 0.308                 | Pro <sup>175</sup> , Leu <sup>176</sup> , Asn <sup>177</sup> , Glu <sup>201</sup> , Lys <sup>202</sup> , Gly <sup>203</sup> , Asp <sup>204</sup> , Val <sup>484</sup> , Asn <sup>516</sup> , Ser <sup>517</sup> , Asn <sup>519</sup> , Ala <sup>520</sup> , Thr <sup>530</sup> , Thr <sup>532</sup> , Val <sup>533</sup> , Asp <sup>534</sup>                                                        |
|     |              |            | E-channel proteins                  | -8.9           | 0.3                   | Arg <sup>61</sup> , Asn <sup>64</sup>                                                                                                                                                                                                                                                                                                                                                                |
|     |              |            | Spike Open Protein                  | -7.58          | 2.78                  | Tyr <sup>38</sup> , Asp <sup>40</sup> , Lys <sup>41</sup> , Val <sup>42</sup> , Phe <sup>43</sup> , Arg <sup>44</sup> , Glu <sup>224</sup> , Pro <sup>225</sup> , Leu <sup>226</sup> , Tyr <sup>279</sup> , Asn <sup>282</sup> , Gly <sup>283</sup> , Thr <sup>284</sup>                                                                                                                             |
|     |              |            | Spike Close Protein                 | -7.14          | 5.83                  | Arg <sup>355</sup> , Asn <sup>394</sup> , Tyr <sup>396</sup> , Pro <sup>426</sup> , Asp <sup>428</sup> , Phe <sup>429</sup> , Thr <sup>430</sup> , Lys <sup>462</sup> , Pro <sup>463</sup> , Phe <sup>464</sup> , Ser <sup>514</sup> , Phe <sup>515</sup> , Glu <sup>516</sup>                                                                                                                       |
| 51  | Ferulic acid | 445858     | Main Protease (MPro)                | -6.29          | 24.35                 | Arg <sup>4</sup> , Met <sup>6</sup> , Ala <sup>7</sup> , Phe <sup>8</sup> , Pro <sup>9</sup> , Gln <sup>127</sup> , Phe <sup>291</sup> , Asp <sup>295</sup> , Arg <sup>298</sup> , Gln <sup>299</sup> , Gly <sup>302</sup> , Val <sup>303</sup>                                                                                                                                                      |
|     |              |            | Papain like protease (PLPro)        | -6.62          | 14.09                 | Asp <sup>164</sup> , Arg <sup>166</sup> , Met <sup>208</sup> , Pro <sup>247</sup> , Pro <sup>248</sup> , Tyr <sup>264</sup> , Asn <sup>267</sup> , Tyr <sup>268</sup> , Thr <sup>301</sup>                                                                                                                                                                                                           |
|     |              |            | RNA-dependent RNA polymerase (RdRP) | -6.08          | 34.76                 | Lys <sup>411</sup> , Pro <sup>412</sup> , Gly <sup>413</sup> , Asn <sup>414</sup> , Phe <sup>441</sup> , Tyr <sup>546</sup> , Val <sup>844</sup> , Asp <sup>845</sup> , Asp <sup>846</sup>                                                                                                                                                                                                           |
|     |              |            | Helicase                            | -6.24          | 26.715                | Pro <sup>406</sup> , Ala <sup>407</sup> , Arg <sup>409</sup> , Leu <sup>412</sup> , Thr <sup>413</sup> , Gly <sup>415</sup> , Thr <sup>416</sup> , Leu <sup>417</sup> , Pro <sup>419</sup> , Phe <sup>422</sup> , Asn <sup>557</sup> , Asn <sup>559</sup> , Arg <sup>560</sup>                                                                                                                       |
|     |              |            | E-channel proteins                  | -6.35          | 22                    | No binding site was found                                                                                                                                                                                                                                                                                                                                                                            |
|     |              |            | Spike Open Protein                  | -5.67          | 70.03                 | Met <sup>740</sup> , Tyr <sup>741</sup> , Gly <sup>744</sup> , Asn <sup>856</sup> , Leu <sup>966</sup> , Ser <sup>967</sup> , Ser <sup>975</sup> , Val <sup>976</sup> , Leu <sup>977</sup> , Asn <sup>978</sup> , Arg <sup>1000</sup>                                                                                                                                                                |
|     |              |            | Spike Close Protein                 | -6.94          | 8.25                  | Tyr <sup>38</sup> , Asp <sup>40</sup> , Lys <sup>41</sup> , Val <sup>42</sup> , Phe <sup>43</sup> , Arg <sup>44</sup> , Glu <sup>224</sup> , Pro <sup>225</sup> , Tyr <sup>279</sup> , Asn <sup>282</sup> , Gly <sup>283</sup> , Thr <sup>284</sup>                                                                                                                                                  |
|     |              |            | Main Protease (MPro)                | -8.12          | 1.12                  | Thr <sup>24</sup> , Thr <sup>25</sup> , Thr <sup>26</sup> , His <sup>41</sup> , Cys <sup>44</sup> , Thr <sup>45</sup> , Ser <sup>46</sup> , Met <sup>49</sup> , Phe <sup>140</sup> , Leu <sup>141</sup> , Asn <sup>142</sup> , Gly <sup>143</sup> , Ser <sup>144</sup> , Cys <sup>145</sup> , His <sup>163</sup> , Met <sup>165</sup> , Glu <sup>166</sup> , Arg <sup>188</sup> , Gln <sup>189</sup> |
|     |              |            | Papain like protease (PLPro)        | -10.08         | 0.04                  | Lys <sup>157</sup> , Glu <sup>161</sup> , Leu <sup>162</sup> , Gly <sup>163</sup> , Asp <sup>164</sup> , Arg <sup>166</sup> , Glu <sup>167</sup> , Ser <sup>170</sup> , Val <sup>202</sup> , Glu <sup>203</sup> , Met <sup>206</sup> , Tyr <sup>207</sup> , Met <sup>208</sup> , Tyr <sup>264</sup> , Tyr <sup>268</sup> , Gln <sup>269</sup> , Tyr <sup>273</sup>                                   |

| Sr. | Ligands          | PubChem ID | Proteins                            | Binding energy | Dissociation Constant | Active site residues                                                                                                                                                                                                                                                                                                                                                 |
|-----|------------------|------------|-------------------------------------|----------------|-----------------------|----------------------------------------------------------------------------------------------------------------------------------------------------------------------------------------------------------------------------------------------------------------------------------------------------------------------------------------------------------------------|
|     |                  |            |                                     | (kcal/mol)     | ( $\mu$ M)            |                                                                                                                                                                                                                                                                                                                                                                      |
| 52  | Flemiflavanone D | 42607928   | RNA-dependent RNA polymerase (RdRP) | -8.05          | 1.27                  | Leu <sup>270</sup> , Pro <sup>322</sup> , Pro <sup>323</sup> , Thr <sup>324</sup> , Arg <sup>349</sup> , Leu <sup>387</sup> , Leu <sup>388</sup> , Leu <sup>389</sup> , Asp <sup>390</sup> , Thr <sup>393</sup> , Thr <sup>394</sup> , Cys <sup>395</sup> , Phe <sup>396</sup> , Ser <sup>397</sup>                                                                  |
|     |                  |            | Helicase                            | -8.21          | 0.959                 | Leu <sup>176</sup> , Asn <sup>177</sup> , Arg <sup>178</sup> , Asn <sup>179</sup> , Glu <sup>201</sup> , Lys <sup>202</sup> , Gly <sup>203</sup> , Asp <sup>204</sup> , Asn <sup>516</sup> , Asn <sup>519</sup> , Ala <sup>520</sup> , Thr <sup>530</sup> , Gln <sup>531</sup> , Thr <sup>532</sup> , Asp <sup>534</sup> , Ser <sup>535</sup>                        |
|     |                  |            | E-channel proteins                  | -8.18          | 1.01                  | No binding site was found                                                                                                                                                                                                                                                                                                                                            |
|     |                  |            | Spike Open Protein                  | -7.81          | 1.89                  | Ser <sup>730</sup> , Met <sup>731</sup> , Thr <sup>732</sup> , Lys <sup>733</sup> , Thr <sup>778</sup> , Phe <sup>823</sup> , Val <sup>826</sup> , Thr <sup>827</sup> , Val <sup>860</sup> , Leu <sup>861</sup> , Pro <sup>862</sup> , Pro <sup>863</sup> , Asp <sup>867</sup> , Ile <sup>870</sup> , Val <sup>952</sup> , Pro <sup>1057</sup> , His <sup>1058</sup> |
|     |                  |            | Spike Close Protein                 | -8.01          | 1.34                  | Tyr <sup>38</sup> , Asp <sup>40</sup> , Lys <sup>41</sup> , Val <sup>42</sup> , Phe <sup>43</sup> , Arg <sup>44</sup> , Ser <sup>45</sup> , Glu <sup>224</sup> , Pro <sup>225</sup> , Asn <sup>282</sup> , Gly <sup>283</sup> , Thr <sup>284</sup>                                                                                                                   |
| 53  | Formononetin     | 5280378    | Main Protease (MPro)                | -7.04          | 6.95                  | Thr <sup>25</sup> , His <sup>41</sup> , Cys <sup>44</sup> , Thr <sup>45</sup> , Ser <sup>46</sup> , Met <sup>49</sup> , Met <sup>165</sup> , Glu <sup>166</sup> , Leu <sup>167</sup> , Pro <sup>168</sup> , Arg <sup>188</sup> , Gln <sup>189</sup> , Thr <sup>190</sup> , Gln <sup>192</sup>                                                                        |
|     |                  |            | Papain like protease (PLPro)        | -8.17          | 1.02                  | Lys <sup>157</sup> , Leu <sup>162</sup> , Gly <sup>163</sup> , Asp <sup>164</sup> , Pro <sup>248</sup> , Tyr <sup>264</sup> , Tyr <sup>268</sup> , Gln <sup>269</sup> , Tyr <sup>273</sup>                                                                                                                                                                           |
|     |                  |            | RNA-dependent RNA polymerase (RdRP) | -6.54          | 16.13                 | Phe <sup>35</sup> , Ile <sup>37</sup> , Phe <sup>48</sup> , Leu <sup>49</sup> , Lys <sup>50</sup> , Thr <sup>206</sup> , Asp <sup>208</sup> , Asn <sup>209</sup> , Asp <sup>218</sup> , Asp <sup>221</sup>                                                                                                                                                           |
|     |                  |            | Helicase                            | -7.31          | 4.375                 | Pro <sup>175</sup> , Asn <sup>179</sup> , Tyr <sup>180</sup> , Pro <sup>406</sup> , Pro <sup>408</sup> , Arg <sup>409</sup> , Thr <sup>410</sup> , Leu <sup>412</sup> , Leu <sup>417</sup> , Phe <sup>422</sup> , Asn <sup>557</sup> , Asn <sup>559</sup> , Arg <sup>560</sup>                                                                                       |
|     |                  |            | E-channel proteins                  | -7.15          | 5.75                  | Leu <sup>28</sup> , Val <sup>29</sup> , Leu <sup>31</sup> , Ala <sup>32</sup> , Thr <sup>35</sup> , Cys <sup>40</sup>                                                                                                                                                                                                                                                |
|     |                  |            | Spike Open Protein                  | -6.4           | 20.29                 | Tyr <sup>38</sup> , Lys <sup>41</sup> , Val <sup>42</sup> , Phe <sup>43</sup> , Arg <sup>44</sup> , Glu <sup>224</sup> , Pro <sup>225</sup> , Leu <sup>226</sup> , Tyr <sup>279</sup> , Gly <sup>283</sup>                                                                                                                                                           |
|     |                  |            | Spike Close Protein                 | -6.76          | 11.11                 | Phe <sup>329</sup> , Pro <sup>330</sup> , Asn <sup>331</sup> , Ile <sup>332</sup> , Thr <sup>333</sup> , Leu <sup>335</sup> , Val <sup>362</sup> , Asp <sup>364</sup> , Gly <sup>526</sup> , Pro <sup>527</sup> , Lys <sup>528</sup> , Lys <sup>529</sup> , Ser <sup>530</sup> , Gln <sup>580</sup>                                                                  |
|     |                  |            | Main Protease (MPro)                | -4.79          | 310.85                | Met <sup>6</sup> , Ala <sup>7</sup> , Phe <sup>8</sup> , Gln <sup>127</sup> , Phe <sup>291</sup> , Asp <sup>295</sup> , Arg <sup>298</sup> , Gln <sup>299</sup> , Val <sup>303</sup>                                                                                                                                                                                 |
|     |                  |            | Papain like protease (PLPro)        | -5.63          | 74.8                  | No binding site was found                                                                                                                                                                                                                                                                                                                                            |

| Sr. | Ligands      | PubChem ID | Proteins                            | Binding energy | Dissociation Constant | Active site residues                                                                                                                                                                                                                                                                                                     |
|-----|--------------|------------|-------------------------------------|----------------|-----------------------|--------------------------------------------------------------------------------------------------------------------------------------------------------------------------------------------------------------------------------------------------------------------------------------------------------------------------|
|     |              |            |                                     | (kcal/mol)     | ( $\mu$ M)            |                                                                                                                                                                                                                                                                                                                          |
| 54  | Fumaric acid | 444972     | RNA-dependent RNA polymerase (RdRP) | -5.6           | 79.08                 | Asp <sup>452</sup> , Tyr <sup>453</sup> , Tyr <sup>455</sup> , Tyr <sup>456</sup> , Met <sup>542</sup> , Thr <sup>556</sup> , Val <sup>557</sup> , Ala <sup>558</sup> , Asp <sup>623</sup> , Arg <sup>624</sup> , Thr <sup>680</sup> , Ser <sup>681</sup> , Ser <sup>682</sup>                                           |
|     |              |            | Helicase                            | -6.17          | 30.065                | Tyr <sup>120</sup> , Ala <sup>123</sup> , Asn <sup>124</sup> , Ala <sup>135</sup> , Leu <sup>138</sup> , Thr <sup>380</sup> , Asn <sup>381</sup> , Tyr <sup>382</sup> , Arg <sup>409</sup> , Tyr <sup>421</sup> , Phe <sup>422</sup> , Asn <sup>423</sup>                                                                |
|     |              |            | E-channel proteins                  | -4.39          | 601.39                | No binding site was found                                                                                                                                                                                                                                                                                                |
|     |              |            | Spike Open Protein                  | -4.73          | 342.82                | Ser <sup>730</sup> , Met <sup>731</sup> , Thr <sup>732</sup> , Lys <sup>733</sup> , Gln <sup>774</sup> , Thr <sup>778</sup> , Pro <sup>863</sup> , Ile <sup>870</sup> , Pro <sup>1057</sup> , His <sup>1058</sup> , Gly <sup>1059</sup>                                                                                  |
|     |              |            | Spike Close Protein                 | -5.06          | 195.09                | Ser <sup>730</sup> , Thr <sup>778</sup> , Pro <sup>863</sup> , Leu <sup>865</sup> , Thr <sup>866</sup> , Asp <sup>867</sup> , Ile <sup>870</sup> , Pro <sup>1057</sup> , His <sup>1058</sup>                                                                                                                             |
| 55  | Galangin     | 5281616    | Main Protease (MPro)                | -7.88          | 1.68                  | Met <sup>6</sup> , Ala <sup>7</sup> , Phe <sup>8</sup> , Pro <sup>9</sup> , Ser <sup>113</sup> , Gln <sup>127</sup> , Asp <sup>295</sup> , Arg <sup>298</sup> , Gln <sup>299</sup> , Gly <sup>302</sup> , Val <sup>303</sup> , Thr <sup>304</sup>                                                                        |
|     |              |            | Papain like protease (PLPro)        | -8.49          | 0.6                   | Arg <sup>166</sup> , Met <sup>208</sup>                                                                                                                                                                                                                                                                                  |
|     |              |            | RNA-dependent RNA polymerase (RdRP) | -7.21          | 5.21                  | Lys <sup>411</sup> , Pro <sup>412</sup> , Gly <sup>413</sup> , Asn <sup>414</sup> , Tyr <sup>546</sup> , Val <sup>844</sup> , Asp <sup>845</sup> , Asp <sup>846</sup>                                                                                                                                                    |
|     |              |            | Helicase                            | -7.21          | 5.214                 | Ala <sup>135</sup> , Leu <sup>138</sup> , Lys <sup>139</sup> , Glu <sup>142</sup> , Asn <sup>179</sup> , Tyr <sup>180</sup> , Met <sup>378</sup> , Ala <sup>379</sup> , Thr <sup>380</sup> , Tyr <sup>382</sup> , Asp <sup>383</sup> , Ala <sup>407</sup> , Pro <sup>408</sup> , Arg <sup>409</sup> , Thr <sup>410</sup> |
|     |              |            | E-channel proteins                  | -7.37          | 3.94                  | Leu <sup>28</sup> , Val <sup>29</sup> , Ala <sup>32</sup> , Ile <sup>33</sup> , Ala <sup>36</sup>                                                                                                                                                                                                                        |
|     |              |            | Spike Open Protein                  | -7.24          | 4.94                  | Trp <sup>104</sup> , Ile <sup>119</sup> , Asn <sup>121</sup> , Val <sup>126</sup> , Ile <sup>128</sup> , Arg <sup>190</sup> , Phe <sup>192</sup> , Phe <sup>194</sup> , Phe <sup>201</sup> , Ile <sup>203</sup> , His <sup>207</sup> , Leu <sup>226</sup> , Val <sup>227</sup>                                           |
|     |              |            | Spike Close Protein                 | -7.03          | 7.03                  | Leu <sup>335</sup> , Cys <sup>336</sup> , Phe <sup>338</sup> , Gly <sup>339</sup> , Phe <sup>342</sup> , Asn <sup>343</sup> , Val <sup>362</sup> , Ala <sup>363</sup> , Asp <sup>364</sup> , Val <sup>367</sup> , Leu <sup>368</sup> , Ser <sup>371</sup> , Ser <sup>373</sup> , Phe <sup>374</sup>                      |
|     |              |            | Main Protease (MPro)                | -6.59          | 14.9                  | Met <sup>6</sup> , Ala <sup>7</sup> , Phe <sup>8</sup> , Gln <sup>127</sup> , Phe <sup>291</sup> , Asp <sup>295</sup> , Arg <sup>298</sup> , Gln <sup>299</sup> , Gly <sup>302</sup> , Val <sup>303</sup>                                                                                                                |
|     |              |            | Papain like protease (PLPro)        | -7.1           | 6.25                  | No binding site was found                                                                                                                                                                                                                                                                                                |
|     |              |            | RNA-dependent RNA polymerase (RdRP) | -6.5           | 17.31                 | Gly <sup>616</sup> , Trp <sup>617</sup> , Asp <sup>618</sup> , Asp <sup>761</sup> , Ala <sup>762</sup> , Val <sup>763</sup> , Lys <sup>798</sup> , Cys <sup>799</sup> , Trp <sup>800</sup> , Glu <sup>811</sup> , Phe <sup>812</sup> , Cys <sup>813</sup> , Ser <sup>814</sup>                                           |

| Sr. | Ligands       | PubChem ID | Proteins                            | Binding energy | Dissociation Constant | Active site residues                                                                                                                                                                                                                                                                                                                                               |
|-----|---------------|------------|-------------------------------------|----------------|-----------------------|--------------------------------------------------------------------------------------------------------------------------------------------------------------------------------------------------------------------------------------------------------------------------------------------------------------------------------------------------------------------|
|     |               |            |                                     | (kcal/mol)     | ( $\mu$ M)            |                                                                                                                                                                                                                                                                                                                                                                    |
| 56  | Gallic acid   | 370        | Helicase                            | -5.84          | 52.21                 | Val <sup>496</sup> , Arg <sup>497</sup> , Leu <sup>500</sup> , Thr <sup>501</sup> , Trp <sup>506</sup> , Arg <sup>507</sup> , Ala <sup>509</sup> , Leu <sup>526</sup> , Gly <sup>527</sup> , Leu <sup>528</sup> , Tyr <sup>543</sup> , Ile <sup>545</sup> , Leu <sup>573</sup>                                                                                     |
|     |               |            | E-channel proteins                  | -5.23          | 147.92                | No binding site was found                                                                                                                                                                                                                                                                                                                                          |
|     |               |            | Spike Open Protein                  | -5.72          | 63.82                 | Gly <sup>908</sup> , Ile <sup>909</sup> , Gln <sup>1036</sup> , Ser <sup>1037</sup> , Lys <sup>1038</sup> , Arg <sup>1039</sup> , Val <sup>1040</sup> , Asp <sup>1041</sup> , Gly <sup>1046</sup> , Tyr <sup>1047</sup> , His <sup>1048</sup>                                                                                                                      |
|     |               |            | Spike Close Protein                 | -6.52          | 16.63                 | Cys <sup>391</sup> , Phe <sup>392</sup> , Thr <sup>393</sup> , Glu <sup>516</sup> , Leu <sup>517</sup> , Leu <sup>518</sup> , His <sup>519</sup> , Ala <sup>520</sup> , Pro <sup>521</sup> , Ala <sup>522</sup> , Thr <sup>523</sup> , Phe <sup>543</sup> , Asn <sup>544</sup> , Gly <sup>545</sup> , Leu <sup>546</sup> , Gln <sup>564</sup> , Phe <sup>565</sup> |
| 57  | Gensitic acid | 3469       | Main Protease (MPro)                | -6.59          | 14.7                  | Phe <sup>3</sup> , Met <sup>6</sup> , Ala <sup>7</sup> , Phe <sup>8</sup> , Gln <sup>127</sup> , Phe <sup>291</sup> , Asp <sup>295</sup> , Val <sup>296</sup> , Arg <sup>298</sup> , Gln <sup>299</sup> , Gly <sup>302</sup> , Val <sup>303</sup>                                                                                                                  |
|     |               |            | Papain like protease (PLPro)        | -6.56          | 15.44                 | No binding site was found                                                                                                                                                                                                                                                                                                                                          |
|     |               |            | RNA-dependent RNA polymerase (RdRP) | -6.11          | 33.16                 | Phe <sup>326</sup> , Gly <sup>327</sup> , Tyr <sup>346</sup> , His <sup>347</sup> , Phe <sup>348</sup> , Arg <sup>349</sup> , Glu <sup>350</sup> , Asn <sup>628</sup> , Ser <sup>664</sup> , Val <sup>675</sup> , Lys <sup>676</sup> , Pro <sup>677</sup> , Gly <sup>678</sup>                                                                                     |
|     |               |            | Helicase                            | -7.09          | 6.396                 | Tyr <sup>120</sup> , Ala <sup>123</sup> , Asn <sup>124</sup> , Lys <sup>131</sup> , Ala <sup>134</sup> , Ala <sup>135</sup> , Leu <sup>138</sup> , Thr <sup>380</sup> , Asn <sup>381</sup> , Tyr <sup>382</sup> , Arg <sup>409</sup> , Leu <sup>417</sup> , Tyr <sup>421</sup> , Phe <sup>422</sup>                                                                |
|     |               |            | E-channel proteins                  | -5.56          | 84.61                 | Leu <sup>51</sup> , Pro <sup>54</sup> , Tyr <sup>57</sup>                                                                                                                                                                                                                                                                                                          |
|     |               |            | Spike Open Protein                  | -6.05          | 36.63                 | Tyr <sup>38</sup> , Asp <sup>40</sup> , Lys <sup>41</sup> , Val <sup>42</sup> , Phe <sup>43</sup> , Arg <sup>44</sup> , Glu <sup>224</sup> , Pro <sup>225</sup> , Tyr <sup>279</sup> , Gly <sup>283</sup> , Thr <sup>284</sup>                                                                                                                                     |
|     |               |            | Spike Close Protein                 | -6.01          | 39.65                 | Tyr <sup>38</sup> , Asp <sup>40</sup> , Lys <sup>41</sup> , Val <sup>42</sup> , Phe <sup>43</sup> , Arg <sup>44</sup> , Glu <sup>224</sup> , Pro <sup>225</sup> , Tyr <sup>279</sup> , Gly <sup>283</sup> , Thr <sup>284</sup>                                                                                                                                     |
|     |               |            | Main Protease (MPro)                | -6.45          | 18.71                 | Met <sup>6</sup> , Ala <sup>7</sup> , Phe <sup>8</sup> , Pro <sup>9</sup> , Thr <sup>111</sup> , Gln <sup>127</sup> , Phe <sup>291</sup> , Asp <sup>295</sup> , Arg <sup>298</sup> , Gln <sup>299</sup> , Val <sup>303</sup>                                                                                                                                       |
|     |               |            | Papain like protease (PLPro)        | -6.51          | 16.82                 | No binding site was found                                                                                                                                                                                                                                                                                                                                          |
|     |               |            | RNA-dependent RNA polymerase (RdRP) | -6.16          | 30.42                 | Arg <sup>305</sup> , Arg <sup>467</sup> , Leu <sup>470</sup> , Phe <sup>471</sup> , Glu <sup>474</sup> , Cys <sup>730</sup> , Leu <sup>731</sup> , Arg <sup>733</sup> , Asn <sup>734</sup> , Arg <sup>735</sup> , Val <sup>737</sup> , Asp <sup>738</sup>                                                                                                          |

| Sr. | Ligands            | PubChem ID | Proteins                               | Binding energy | Dissociation Constant | Active site residues                                                                                                                                                                                                                                                                                                                                                                                               |
|-----|--------------------|------------|----------------------------------------|----------------|-----------------------|--------------------------------------------------------------------------------------------------------------------------------------------------------------------------------------------------------------------------------------------------------------------------------------------------------------------------------------------------------------------------------------------------------------------|
|     |                    |            |                                        | (kcal/mol)     | ( $\mu$ M)            |                                                                                                                                                                                                                                                                                                                                                                                                                    |
| 58  | Gentisic acid      | 3469       | Helicase                               | -5.99          | 40.807                | Val <sup>496</sup> , Arg <sup>497</sup> , Phe <sup>499</sup> , Leu <sup>500</sup> , Thr <sup>501</sup> , Trp <sup>506</sup> , Arg <sup>507</sup> , Ala <sup>509</sup> ,<br>Leu <sup>526</sup> , Tyr <sup>543</sup> , Ile <sup>545</sup> , Leu <sup>573</sup>                                                                                                                                                       |
|     |                    |            | E-channel proteins                     | -5.56          | 84.32                 | Leu <sup>51</sup> , Pro <sup>54</sup> , Tyr <sup>57</sup>                                                                                                                                                                                                                                                                                                                                                          |
|     |                    |            | Spike Open Protein                     | -5.89          | 47.99                 | Tyr <sup>38</sup> , Asp <sup>40</sup> , Lys <sup>41</sup> , Val <sup>42</sup> , Phe <sup>43</sup> , Arg <sup>44</sup> , Glu <sup>224</sup> , Pro <sup>225</sup> , Tyr <sup>279</sup> ,<br>Gly <sup>283</sup>                                                                                                                                                                                                       |
|     |                    |            | Spike Close Protein                    | -6.25          | 26.09                 | Tyr <sup>38</sup> , Asp <sup>40</sup> , Lys <sup>41</sup> , Val <sup>42</sup> , Phe <sup>43</sup> , Arg <sup>44</sup> , Glu <sup>224</sup> , Pro <sup>225</sup> , Tyr <sup>279</sup> ,<br>Gly <sup>283</sup> , Thr <sup>284</sup>                                                                                                                                                                                  |
| 59  | Glycyrrhisoflavone | 5317764    | Main Protease (MPro)                   | -7.65          | 2.49                  | Leu <sup>27</sup> , His <sup>41</sup> , Met <sup>49</sup> , Asn <sup>142</sup> , Gly <sup>143</sup> , Cys <sup>145</sup> , Met <sup>165</sup> , Glu <sup>166</sup> ,<br>Leu <sup>167</sup> , Pro <sup>168</sup> , Gly <sup>170</sup> , Arg <sup>188</sup> , Gln <sup>189</sup> , Thr <sup>190</sup> , Gln <sup>192</sup>                                                                                           |
|     |                    |            | Papain like protease (PLPro)           | -9.34          | 0.14                  | Cys <sup>155</sup> , Asn <sup>156</sup> , Lys <sup>157</sup> , Leu <sup>162</sup> , Gly <sup>163</sup> , Asp <sup>164</sup> , Glu <sup>167</sup> , Tyr <sup>171</sup> ,<br>Tyr <sup>268</sup> , Gln <sup>269</sup>                                                                                                                                                                                                 |
|     |                    |            | RNA-dependent RNA<br>polymerase (RdRP) | -8.01          | 1.34                  | Arg <sup>33</sup> , Phe <sup>35</sup> , Asp <sup>36</sup> , Ile <sup>37</sup> , Tyr <sup>38</sup> , Asn <sup>39</sup> , Lys <sup>50</sup> , Lys <sup>73</sup> , Thr <sup>123</sup> ,<br>Thr <sup>206</sup> , Asp <sup>208</sup> , Asn <sup>209</sup> , Tyr <sup>217</sup> , Asp <sup>218</sup> , Asp <sup>221</sup>                                                                                                |
|     |                    |            | Helicase                               | -8.58          | 0.514                 | Asn <sup>177</sup> , Asn <sup>179</sup> , Glu <sup>201</sup> , Lys <sup>202</sup> , Gly <sup>203</sup> , Asp <sup>204</sup> , Val <sup>484</sup> , Ser <sup>486</sup> ,<br>Pro <sup>514</sup> , Tyr <sup>515</sup> , Asn <sup>516</sup> , Ser <sup>517</sup> , Asn <sup>519</sup> , Ala <sup>520</sup> , Thr <sup>530</sup> , Thr <sup>532</sup> ,<br>Val <sup>533</sup> , Asp <sup>534</sup> , Arg <sup>560</sup> |
|     |                    |            | E-channel proteins                     | -8.06          | 1.23                  | Arg <sup>61</sup> , Asn <sup>64</sup> , Leu <sup>65</sup>                                                                                                                                                                                                                                                                                                                                                          |
|     |                    |            | Spike Open Protein                     | -7.33          | 4.22                  | His <sup>1101</sup> , Trp <sup>1102</sup> , Phe <sup>1103</sup> , Ile <sup>1114</sup> , Ile <sup>1115</sup> , Thr <sup>1116</sup> , Asn <sup>1135</sup> , Thr <sup>1136</sup> ,<br>Tyr <sup>1138</sup> , Pro <sup>1140</sup>                                                                                                                                                                                       |
|     |                    |            | Spike Close Protein                    | -7.88          | 1.67                  | Arg <sup>102</sup> , Trp <sup>104</sup> , Ile <sup>119</sup> , Asn <sup>121</sup> , Val <sup>126</sup> , Ile <sup>128</sup> , Arg <sup>190</sup> , Phe <sup>192</sup> , Phe <sup>194</sup> ,<br>Ile <sup>203</sup> , Ser <sup>205</sup> , Lys <sup>206</sup> , His <sup>207</sup> , Leu <sup>226</sup> , Val <sup>227</sup>                                                                                        |
|     |                    |            | Main Protease (MPro)                   | -9.57          | 0.11                  | Thr <sup>24</sup> , Thr <sup>25</sup> , Thr <sup>26</sup> , Leu <sup>27</sup> , Gly <sup>29</sup> , His <sup>41</sup> , Cys <sup>44</sup> , Ser <sup>46</sup> , Met <sup>49</sup> ,<br>Tyr <sup>118</sup> , Asn <sup>119</sup> ,<br>Asn <sup>142</sup> , Gly <sup>143</sup> , Cys <sup>145</sup> , His <sup>163</sup> , His <sup>164</sup> , Met <sup>165</sup> , Glu <sup>166</sup>                               |
|     |                    |            |                                        | -9.46          | 0.76                  | Arg <sup>131</sup> , Asn <sup>133</sup> , Thr <sup>135</sup> , Val <sup>137</sup> , Thr <sup>169</sup> , Val <sup>171</sup> , Ala <sup>194</sup> , Gly <sup>195</sup> ,<br>Thr <sup>196</sup> , Asp <sup>197</sup> ,                                                                                                                                                                                               |
|     |                    |            |                                        |                |                       |                                                                                                                                                                                                                                                                                                                                                                                                                    |

| Sr. | Ligands      | PubChem ID | Proteins                     | Binding energy | Dissociation Constant | Active site residues                                                                                                                                                                                                                                                                                                                                                                                                                                                                                                                                                                                      |
|-----|--------------|------------|------------------------------|----------------|-----------------------|-----------------------------------------------------------------------------------------------------------------------------------------------------------------------------------------------------------------------------------------------------------------------------------------------------------------------------------------------------------------------------------------------------------------------------------------------------------------------------------------------------------------------------------------------------------------------------------------------------------|
|     |              |            |                              | (kcal/mol)     | ( $\mu$ M)            |                                                                                                                                                                                                                                                                                                                                                                                                                                                                                                                                                                                                           |
| 60  | Glycyrrhizin | 14982      |                              | -9.46          | 0.76                  | Thr <sup>198</sup> , Thr <sup>199</sup> , Tyr <sup>237</sup> , Asn <sup>238</sup> , Tyr <sup>239</sup> , Leu <sup>272</sup> , Leu <sup>286</sup> , Leu <sup>287</sup> , Asp <sup>289</sup>                                                                                                                                                                                                                                                                                                                                                                                                                |
|     |              |            | Papain like protease (PLPro) | -9.23          | 0.17                  | Gly <sup>209</sup> , Thr <sup>210</sup> , Leu <sup>211</sup> , Ser <sup>212</sup> , Tyr <sup>213</sup> , Glu <sup>214</sup> , Gln <sup>215</sup> , Val <sup>220</sup> , Gln <sup>221</sup> , Ala <sup>249</sup> , Gln <sup>250</sup> , Tyr <sup>251</sup> , Glu <sup>252</sup> , Leu <sup>253</sup> , Lys <sup>254</sup> , Thr <sup>257</sup> , Phe <sup>258</sup> , Val <sup>303</sup> , Tyr <sup>305</sup>                                                                                                                                                                                              |
|     |              |            | RNA Polymerase               | -9.96          | 0.05                  | Asp <sup>452</sup> , Tyr <sup>455</sup> , Arg <sup>553</sup> , Ala <sup>554</sup> , Arg <sup>555</sup> , Trp <sup>617</sup> , Asp <sup>618</sup> , Lys <sup>621</sup> , Cys <sup>622</sup> , Asp <sup>623</sup> ,                                                                                                                                                                                                                                                                                                                                                                                         |
|     |              |            |                              |                |                       | Arg <sup>624</sup> , Ser <sup>759</sup> , Asp <sup>760</sup> , Asp <sup>761</sup> , Lys <sup>798</sup> , Trp <sup>800</sup> , Glu <sup>811</sup> , Cys <sup>813</sup> , Ser <sup>814</sup>                                                                                                                                                                                                                                                                                                                                                                                                                |
|     |              |            |                              | -10.52         | 0.03                  | Asp <sup>452</sup> , Tyr <sup>455</sup> , Lys <sup>551</sup> , Arg <sup>553</sup> , Ala <sup>554</sup> , Arg <sup>555</sup> , Thr <sup>556</sup> , Trp <sup>617</sup> , Asp <sup>618</sup> , Tyr <sup>619</sup> , Pro <sup>620</sup> , Lys <sup>621</sup> , Cys <sup>622</sup> , Asp <sup>623</sup> , Arg <sup>624</sup> , Ser <sup>759</sup> , Asp <sup>760</sup> , Asp <sup>761</sup> , Ala <sup>762</sup> , Lys <sup>798</sup> , Cys <sup>799</sup> , Trp <sup>800</sup> , Glu <sup>811</sup> , Phe <sup>812</sup> , Cys <sup>813</sup> , Ser <sup>814</sup>                                           |
|     |              |            | Helicase                     | -11.57         | 0.003                 | Pro <sup>175</sup> , Leu <sup>176</sup> , Asn <sup>177</sup> , Lys <sup>202</sup> , Leu <sup>405</sup> , Pro <sup>406</sup> , Ala <sup>407</sup> , Pro <sup>408</sup> , Arg <sup>409</sup> , Leu <sup>412</sup> , Thr <sup>413</sup> , Gly <sup>415</sup> , Thr <sup>416</sup> , Leu <sup>417</sup> , Phe <sup>422</sup> , Ser <sup>485</sup> , Ser <sup>486</sup> , Pro <sup>514</sup> , Tyr <sup>515</sup> , Asn <sup>516</sup> , Asn <sup>519</sup> , Thr <sup>532</sup> , Val <sup>533</sup> , Asp <sup>534</sup> , His <sup>554</sup> , Asn <sup>557</sup> , Asn <sup>559</sup> , Arg <sup>560</sup> |
|     |              |            | E-channel proteins           | -10.07         | 0.04                  | Arg <sup>61</sup> , Asn <sup>64</sup>                                                                                                                                                                                                                                                                                                                                                                                                                                                                                                                                                                     |
|     |              |            | Spike Open Protein           | -9.29          | 0.16                  | Val <sup>47</sup> , His <sup>49</sup> , Lys <sup>304</sup> , Met <sup>740</sup> , Tyr <sup>741</sup> , Ile <sup>742</sup> , Cys <sup>743</sup> , Gly <sup>744</sup> , Asp <sup>745</sup> , Phe <sup>855</sup> , Asn <sup>856</sup> , Val <sup>963</sup> , Lys <sup>964</sup> , Leu <sup>966</sup> , Ser <sup>967</sup> , Ser <sup>975</sup> , Val <sup>976</sup> , Leu <sup>977</sup> , Asn <sup>978</sup> , Arg <sup>1000</sup>                                                                                                                                                                          |
|     |              |            | Spike Close Protein          | -9.49          | 0.11                  | Tyr <sup>741</sup> , Ile <sup>742</sup> , Cys <sup>743</sup> , Gly <sup>744</sup> , Asp <sup>745</sup> , Phe <sup>855</sup> , Asn <sup>856</sup> , Val <sup>963</sup> , Lys <sup>964</sup> , Leu <sup>966</sup> , Ser <sup>967</sup> , Ser <sup>975</sup> , Val <sup>976</sup> , Leu <sup>977</sup> , Asn <sup>978</sup> , Arg <sup>1000</sup>                                                                                                                                                                                                                                                            |
|     |              |            | Main Protease (MPro)         | -4.09          | 997.83                | Trp <sup>218</sup> , Phe <sup>219</sup> , Leu <sup>220</sup> , Asn <sup>221</sup> , Arg <sup>222</sup> , Phe <sup>223</sup> , Ser <sup>267</sup> , Glu <sup>270</sup> , Leu <sup>271</sup> , Asn <sup>274</sup> , Gly <sup>275</sup> , Met <sup>276</sup> , Asn <sup>277</sup> , Arg <sup>279</sup>                                                                                                                                                                                                                                                                                                       |
|     |              |            | Papain like protease (PLPro) | -5.58          | 80.7                  | Arg <sup>65</sup> , Val <sup>66</sup> , Ala <sup>68</sup> , Phe <sup>69</sup> , Glu <sup>70</sup> , Thr <sup>74</sup> , Thr <sup>75</sup>                                                                                                                                                                                                                                                                                                                                                                                                                                                                 |

| Sr. | Ligands            | PubChem ID | Proteins                            | Binding energy | Dissociation Constant | Active site residues                                                                                                                                                                                                                                                                                                                                                                                  |
|-----|--------------------|------------|-------------------------------------|----------------|-----------------------|-------------------------------------------------------------------------------------------------------------------------------------------------------------------------------------------------------------------------------------------------------------------------------------------------------------------------------------------------------------------------------------------------------|
|     |                    |            |                                     | (kcal/mol)     | ( $\mu$ M)            |                                                                                                                                                                                                                                                                                                                                                                                                       |
| 61  | Heneicosanoic acid | 16898      | RNA-dependent RNA polymerase (RdRP) | -3.76          | 1744.55               | Phe <sup>35</sup> , Asp <sup>36</sup> , Ile <sup>37</sup> , Phe <sup>48</sup> , Leu <sup>49</sup> , Lys <sup>50</sup> , Lys <sup>73</sup> , Thr <sup>206</sup> , Asp <sup>208</sup> , Asn <sup>209</sup> , Asp <sup>218</sup> , Asp <sup>221</sup>                                                                                                                                                    |
|     |                    |            | Helicase                            | -4.81          | 300.024               | Ala <sup>4</sup> , Val <sup>6</sup> , Arg <sup>15</sup> , Arg <sup>21</sup> , Arg <sup>22</sup> , Pro <sup>23</sup> , Phe <sup>24</sup> , Arg <sup>129</sup> , Leu <sup>132</sup> , Phe <sup>133</sup> , Glu <sup>136</sup> , Pro <sup>234</sup> , Leu <sup>235</sup> , Ser <sup>236</sup>                                                                                                            |
|     |                    |            | E-channel proteins                  | -5.67          | 69.68                 | No binding site was found                                                                                                                                                                                                                                                                                                                                                                             |
|     |                    |            | Spike Open Protein                  | -3.45          | 2943.86               | Pro <sup>426</sup> , Asp <sup>428</sup> , Phe <sup>429</sup> , Thr <sup>430</sup> , Phe <sup>464</sup> , Ser <sup>514</sup> , Phe <sup>515</sup> , Glu <sup>516</sup> , Leu <sup>517</sup> , Leu <sup>518</sup>                                                                                                                                                                                       |
|     |                    |            | Spike Close Protein                 | -4.45          | 547.15                | Tyr <sup>38</sup> , Asp <sup>40</sup> , Lys <sup>41</sup> , Val <sup>42</sup> , Phe <sup>43</sup> , Glu <sup>224</sup> , Pro <sup>225</sup> , Leu <sup>226</sup> , Asn <sup>282</sup> , Gly <sup>283</sup> , Thr <sup>284</sup>                                                                                                                                                                       |
| 62  | Hesperetin         | 72281      | Main Protease (MPro)                | -7.33          | 4.22                  | Met <sup>49</sup> , Phe <sup>140</sup> , Leu <sup>141</sup> , Asn <sup>142</sup> , Gly <sup>143</sup> , Ser <sup>144</sup> , Cys <sup>145</sup> , His <sup>163</sup> , Met <sup>165</sup> , Glu <sup>166</sup> , Leu <sup>167</sup> , Pro <sup>168</sup> , His <sup>172</sup> , Arg <sup>188</sup> , Gln <sup>189</sup> , Thr <sup>190</sup> , Gln <sup>192</sup>                                     |
|     |                    |            | Papain like protease (PLPro)        | -8.34          | 0.77                  | Cys <sup>155</sup> , Asn <sup>156</sup> , Lys <sup>157</sup> , Glu <sup>161</sup> , Leu <sup>162</sup> , Gly <sup>163</sup> , Glu <sup>167</sup> , Tyr <sup>171</sup>                                                                                                                                                                                                                                 |
|     |                    |            | RNA-dependent RNA polymerase (RdRP) | -7.59          | 2.74                  | Thr <sup>591</sup> , Ser <sup>592</sup> , Lys <sup>593</sup> , Phe <sup>594</sup> , Gln <sup>815</sup> , Pro <sup>830</sup> , Tyr <sup>831</sup> , Pro <sup>832</sup> , Asp <sup>865</sup> , Pro <sup>868</sup> , Trp <sup>916</sup>                                                                                                                                                                  |
|     |                    |            | Helicase                            | -7.8           | 1.933                 | Asn <sup>177</sup> , Asn <sup>179</sup> , Tyr <sup>180</sup> , Leu <sup>405</sup> , Pro <sup>406</sup> , Pro <sup>408</sup> , Arg <sup>409</sup> , Thr <sup>410</sup> , Leu <sup>411</sup> , Leu <sup>412</sup> , Thr <sup>413</sup> , Thr <sup>416</sup> , Leu <sup>417</sup> , Phe <sup>422</sup> , Asn <sup>557</sup> , Asn <sup>559</sup> , Arg <sup>560</sup>                                    |
|     |                    |            | E-channel proteins                  | -7.42          | 3.62                  | Ile <sup>46</sup> , Ser <sup>50</sup> , Leu <sup>51</sup> , Pro <sup>54</sup> , Phe <sup>56</sup> , Tyr <sup>57</sup> , Ser <sup>60</sup>                                                                                                                                                                                                                                                             |
|     |                    |            | Spike Open Protein                  | -6.88          | 9.1                   | Arg <sup>355</sup> , Asn <sup>394</sup> , Tyr <sup>396</sup> , Pro <sup>426</sup> , Asp <sup>428</sup> , Phe <sup>429</sup> , Thr <sup>430</sup> , Phe <sup>464</sup> , Ser <sup>514</sup> , Phe <sup>515</sup> , Glu <sup>516</sup> , Leu <sup>517</sup> , Leu <sup>518</sup>                                                                                                                        |
|     |                    |            | Spike Close Protein                 | -7.1           | 6.28                  | Met <sup>740</sup> , Tyr <sup>741</sup> , Ile <sup>742</sup> , Cys <sup>743</sup> , Gly <sup>744</sup> , Asn <sup>856</sup> , Val <sup>963</sup> , Lys <sup>964</sup> , Leu <sup>966</sup> , Ser <sup>967</sup> , Val <sup>976</sup> , Leu <sup>977</sup> , Asn <sup>978</sup> , Arg <sup>1000</sup>                                                                                                  |
|     |                    |            | Main Protease (MPro)                | -8.02          | 1.33                  | Thr <sup>24</sup> , Thr <sup>25</sup> , Thr <sup>26</sup> , His <sup>41</sup> , Thr <sup>45</sup> , Ser <sup>46</sup> , Met <sup>49</sup> , Phe <sup>140</sup> , Leu <sup>141</sup> , Asn <sup>142</sup> , Gly <sup>143</sup> , Ser <sup>144</sup> , Cys <sup>145</sup> , His <sup>163</sup> , His <sup>164</sup> , Met <sup>165</sup> , Glu <sup>166</sup> , His <sup>172</sup> , Gln <sup>189</sup> |



| Sr. | Ligands           | PubChem ID | Proteins                               | Binding energy | Dissociation Constant | Active site residues                                                                                                                                                                                                                                                                                                                                                                                                                                                                                   |
|-----|-------------------|------------|----------------------------------------|----------------|-----------------------|--------------------------------------------------------------------------------------------------------------------------------------------------------------------------------------------------------------------------------------------------------------------------------------------------------------------------------------------------------------------------------------------------------------------------------------------------------------------------------------------------------|
|     |                   |            |                                        | (kcal/mol)     | ( $\mu$ M)            |                                                                                                                                                                                                                                                                                                                                                                                                                                                                                                        |
| 63  | Hesperidin        | 10621      | Papain like protease (PLPro)           | -10.61         | 0.02                  | Lys <sup>157</sup> , Thr <sup>158</sup> , Glu <sup>161</sup> , Leu <sup>162</sup> , Gly <sup>163</sup> , Asp <sup>164</sup> , Val <sup>165</sup> , Glu <sup>167</sup> ,<br>Leu <sup>199</sup> , Glu <sup>203</sup> ,                                                                                                                                                                                                                                                                                   |
|     |                   |            |                                        |                |                       | Tyr <sup>207</sup> , Met <sup>208</sup> , Lys <sup>232</sup> , Pro <sup>248</sup> , Tyr <sup>264</sup> , Tyr <sup>268</sup> , Gln <sup>269</sup> , Cys <sup>270</sup> ,<br>Tyr <sup>273</sup> , Thr <sup>301</sup>                                                                                                                                                                                                                                                                                     |
|     |                   |            | RNA-dependent RNA<br>polymerase (RdRP) | -9.53          | 0.1                   | Val <sup>166</sup> , Tyr <sup>456</sup> , Met <sup>542</sup> , Arg <sup>553</sup> , Ala <sup>554</sup> , Arg <sup>555</sup> , Thr <sup>556</sup> , Val <sup>557</sup> ,<br>Ala <sup>558</sup> , Asp <sup>618</sup> , Tyr <sup>619</sup> , Pro <sup>620</sup> , Lys <sup>621</sup> , Cys <sup>622</sup> , Asp <sup>623</sup> , Arg <sup>624</sup> ,<br>Lys <sup>676</sup> , Thr <sup>680</sup> , Ser <sup>681</sup> , Ser <sup>682</sup> , Phe <sup>793</sup> , Ser <sup>795</sup> , Lys <sup>798</sup> |
|     |                   |            | Helicase                               | -8.93          | 0.283                 | Lys <sup>139</sup> , Glu <sup>142</sup> , Glu <sup>143</sup> , Lys <sup>146</sup> , Arg <sup>178</sup> , Asn <sup>179</sup> , Val <sup>181</sup> , Glu <sup>197</sup> ,<br>Thr <sup>228</sup> , His <sup>230</sup> , Cys <sup>309</sup> , Arg <sup>337</sup> , Arg <sup>339</sup> , Met <sup>378</sup> , Ala <sup>379</sup> , Thr <sup>380</sup> ,<br>Tyr <sup>382</sup> , Asp <sup>383</sup> , Ala <sup>407</sup> , Pro <sup>408</sup> , Thr <sup>410</sup>                                           |
|     |                   |            | E-channel proteins                     | -8.82          | 0.34                  | Leu <sup>28</sup> , Val <sup>29</sup> , Leu <sup>31</sup> , Ala <sup>32</sup> , Leu <sup>34</sup> , Thr <sup>35</sup> , Ala <sup>36</sup> , Cys <sup>40</sup>                                                                                                                                                                                                                                                                                                                                          |
|     |                   |            | Spike Open Protein                     | -8.18          | 1.01                  | Asn <sup>710</sup> , Thr <sup>1076</sup> , Ser <sup>1097</sup> , Gly <sup>1099</sup> , Thr <sup>1100</sup> , His <sup>1101</sup> , Trp <sup>1102</sup> , Ile <sup>1114</sup> ,<br>Ile <sup>1115</sup> , Val <sup>1133</sup> , Asn <sup>1134</sup> , Asn <sup>1135</sup> , Thr <sup>1136</sup> , Tyr <sup>1138</sup>                                                                                                                                                                                    |
| 64  | Homogentisic acid | 780        | Spike Close Protein                    | -8.53          | 0.56                  | Tyr <sup>38</sup> , Asp <sup>40</sup> , Lys <sup>41</sup> , Val <sup>42</sup> , Phe <sup>43</sup> , Arg <sup>44</sup> , Lys <sup>206</sup> , Phe <sup>220</sup> , Ser <sup>221</sup> ,<br>Ala <sup>222</sup> , Glu <sup>224</sup> , Pro <sup>225</sup> , Leu <sup>226</sup> , Tyr <sup>279</sup> , Gly <sup>283</sup> , Thr <sup>284</sup>                                                                                                                                                             |
|     |                   |            | Main Protease (MPro)                   | 8.99           | 8.99                  | Leu <sup>51</sup> , Pro <sup>54</sup> , Tyr <sup>57</sup>                                                                                                                                                                                                                                                                                                                                                                                                                                              |
|     |                   |            | Papain like protease (PLPro)           | -6.59          | 14.87                 | No binding site was found                                                                                                                                                                                                                                                                                                                                                                                                                                                                              |
|     |                   |            | RNA-dependent RNA<br>polymerase (RdRP) | -6.65          | 13.31                 | Pro <sup>323</sup> , Thr <sup>324</sup> , Phe <sup>326</sup> , Gly <sup>327</sup> , Tyr <sup>346</sup> , His <sup>347</sup> , Phe <sup>348</sup> , Arg <sup>349</sup> ,<br>Glu <sup>350</sup> , Asn <sup>628</sup> , Ser <sup>664</sup> , Val <sup>675</sup> , Lys <sup>676</sup> , Pro <sup>677</sup>                                                                                                                                                                                                 |
|     |                   |            | Helicase                               | -6.2           | 28.774                | Val <sup>496</sup> , Phe <sup>499</sup> , Leu <sup>500</sup> , Thr <sup>501</sup> , Asn <sup>503</sup> , Trp <sup>506</sup> , Arg <sup>507</sup> , Ala <sup>509</sup> ,<br>Leu <sup>526</sup> , Leu <sup>528</sup> , Tyr <sup>543</sup> , Ile <sup>545</sup> , Leu <sup>573</sup>                                                                                                                                                                                                                      |
|     |                   |            | E-channel proteins                     | -5.52          | 89.3                  | Leu <sup>51</sup> , Pro <sup>54</sup> , Tyr <sup>57</sup>                                                                                                                                                                                                                                                                                                                                                                                                                                              |
|     |                   |            | Spike Open Protein                     | -5.09          | 187.35                | Gly <sup>885</sup> , Trp <sup>886</sup> , Thr <sup>887</sup> , Ile <sup>896</sup> , Met <sup>900</sup> , Gln <sup>901</sup> , Ala <sup>903</sup> , Tyr <sup>904</sup> , Arg <sup>905</sup>                                                                                                                                                                                                                                                                                                             |
| 64  | Homogentisic acid | 780        | Spike Close Protein                    | -6             | 39.85                 | Tyr <sup>38</sup> , Asp <sup>40</sup> , Lys <sup>41</sup> , Val <sup>42</sup> , Phe <sup>43</sup> , Arg <sup>44</sup> , Glu <sup>224</sup> , Pro <sup>225</sup> , Tyr <sup>279</sup> ,<br>Gly <sup>283</sup> , Thr <sup>284</sup>                                                                                                                                                                                                                                                                      |

| Sr. | Ligands        | PubChem ID | Proteins                            | Binding energy | Dissociation Constant | Active site residues                                                                                                                                                                                                                                                                                                                                                                                                                                                |
|-----|----------------|------------|-------------------------------------|----------------|-----------------------|---------------------------------------------------------------------------------------------------------------------------------------------------------------------------------------------------------------------------------------------------------------------------------------------------------------------------------------------------------------------------------------------------------------------------------------------------------------------|
|     |                |            |                                     | (kcal/mol)     | ( $\mu$ M)            |                                                                                                                                                                                                                                                                                                                                                                                                                                                                     |
| 65  | Hydroxytyrosol | 82755      | Main Protease (MPro)                | -6.48          | 17.73                 | Met <sup>6</sup> , Ala <sup>7</sup> , Phe <sup>8</sup> , Gln <sup>127</sup> , Phe <sup>291</sup> , Asp <sup>295</sup> , Arg <sup>298</sup> , Gln <sup>299</sup> , Gly <sup>302</sup> , Val <sup>303</sup>                                                                                                                                                                                                                                                           |
|     |                |            | Papain like protease (PLPro)        | -6.34          | 22.57                 | Gln <sup>174</sup> , His <sup>175</sup> , Val <sup>202</sup>                                                                                                                                                                                                                                                                                                                                                                                                        |
|     |                |            | RNA-dependent RNA polymerase (RdRP) | -5.59          | 80.29                 | Lys <sup>593</sup> , Phe <sup>594</sup> , Gln <sup>815</sup> , Pro <sup>830</sup> , Tyr <sup>831</sup> , Pro <sup>832</sup> , Asp <sup>865</sup> , Pro <sup>868</sup> , Trp <sup>916</sup>                                                                                                                                                                                                                                                                          |
|     |                |            | Helicase                            | -5.38          | 114.062               | Ala <sup>4</sup> , Cys <sup>5</sup> , Val <sup>6</sup> , Arg <sup>21</sup> , Pro <sup>23</sup> , Phe <sup>24</sup> , Arg <sup>129</sup> , Leu <sup>132</sup> , Phe <sup>133</sup> , Glu <sup>136</sup>                                                                                                                                                                                                                                                              |
|     |                |            | E-channel proteins                  | -5.3           | 129.89                | No binding site was found                                                                                                                                                                                                                                                                                                                                                                                                                                           |
|     |                |            | Spike Open Protein                  | -5.5           | 92.68                 | Tyr <sup>38</sup> , Pro <sup>39</sup> , Asp <sup>40</sup> , Lys <sup>41</sup> , Val <sup>42</sup> , Phe <sup>43</sup> , Arg <sup>44</sup> , Glu <sup>224</sup> , Pro <sup>225</sup> , Tyr <sup>279</sup> , Gly <sup>283</sup> , Thr <sup>284</sup>                                                                                                                                                                                                                  |
|     |                |            | Spike Close Protein                 | -5.06          | 197.08                | Met <sup>740</sup> , Tyr <sup>741</sup> , Ile <sup>742</sup> , Cys <sup>743</sup> , Gly <sup>744</sup> , Asn <sup>856</sup> , Leu <sup>966</sup> , Ser <sup>967</sup> , Ser <sup>975</sup> , Val <sup>976</sup> , Leu <sup>977</sup> , Arg <sup>1000</sup>                                                                                                                                                                                                          |
| 66  | Isoliquiritin  | 5318591    | Main Protease (MPro)                | -7.87          | 1.69                  | Thr <sup>24</sup> , Thr <sup>25</sup> , Thr <sup>26</sup> , His <sup>41</sup> , Cys <sup>44</sup> , Thr <sup>45</sup> , Ser <sup>46</sup> , Met <sup>49</sup> , Asn <sup>142</sup> , Gly <sup>143</sup> , Cys <sup>145</sup> , His <sup>164</sup> , Met <sup>165</sup> , Glu <sup>166</sup> , Leu <sup>167</sup> , Pro <sup>168</sup> , Val <sup>186</sup> , Arg <sup>188</sup> , Gln <sup>189</sup> , Thr <sup>190</sup> , Ala <sup>191</sup> , Gln <sup>192</sup> |
|     |                |            | Papain like protease (PLPro)        | -9.12          | 0.21                  | Met <sup>208</sup> , Asn <sup>267</sup> , Tyr <sup>268</sup> , Gln <sup>269</sup>                                                                                                                                                                                                                                                                                                                                                                                   |
|     |                |            | RNA-dependent RNA polymerase (RdRP) | -7.71          | 2.23                  | Tyr <sup>265</sup> , Ile <sup>266</sup> , Lys <sup>267</sup> , Trp <sup>268</sup> , Leu <sup>270</sup> , Pro <sup>322</sup> , Pro <sup>323</sup> , Thr <sup>324</sup> , Leu <sup>388</sup> , Leu <sup>389</sup> , Asp <sup>390</sup> , Thr <sup>393</sup> , Thr <sup>394</sup> , Cys <sup>395</sup> , Phe <sup>396</sup> , Ser <sup>397</sup>                                                                                                                       |
|     |                |            | Helicase                            | -7.85          | 1.75                  | Asn <sup>177</sup> , Asn <sup>179</sup> , Leu <sup>405</sup> , Pro <sup>406</sup> , Ala <sup>407</sup> , Pro <sup>408</sup> , Arg <sup>409</sup> , Leu <sup>412</sup> , Thr <sup>416</sup> , Leu <sup>417</sup> , Phe <sup>422</sup> , Pro <sup>514</sup> , Tyr <sup>515</sup> , Asn <sup>516</sup> , Asn <sup>519</sup> , Thr <sup>532</sup> , Asp <sup>534</sup> , Asn <sup>557</sup> , Asn <sup>559</sup> , Arg <sup>560</sup>                                   |
|     |                |            | E-channel proteins                  | -8.42          | 0.68                  | Leu <sup>27</sup> , Ile <sup>46</sup> , Val <sup>47</sup> , Ser <sup>50</sup> , Leu <sup>51</sup> , Pro <sup>54</sup> , Phe <sup>56</sup> , Tyr <sup>57</sup> , Ser <sup>60</sup>                                                                                                                                                                                                                                                                                   |
|     |                |            | Spike Open Protein                  | -6.8           | 10.29                 | Asn <sup>30</sup> , Thr <sup>33</sup> , Phe <sup>58</sup> , Phe <sup>59</sup> , Ser <sup>60</sup> , Ala <sup>288</sup> , Val <sup>289</sup> , Asp <sup>290</sup> , Leu <sup>293</sup> , Asp <sup>294</sup> , Leu <sup>296</sup> , Ser <sup>297</sup> , Lys <sup>300</sup> , Asn <sup>606</sup>                                                                                                                                                                      |
|     |                |            | Spike Close Protein                 | -6.98          | 7.64                  | Ile <sup>105</sup> , Leu <sup>118</sup> , Val <sup>120</sup> , Asn <sup>122</sup> , Asn <sup>125</sup> , Val <sup>127</sup> , Lys <sup>129</sup> , Phe <sup>133</sup> , Gln <sup>134</sup> , Phe <sup>135</sup> , Cys <sup>136</sup> , Pro <sup>139</sup> , Phe <sup>140</sup> , Leu <sup>141</sup> , Val <sup>171</sup> , Leu <sup>241</sup>                                                                                                                       |

| Sr. | Ligands      | PubChem ID | Proteins                            | Binding energy | Dissociation Constant | Active site residues                                                                                                                                                                                                                                                                                                      |
|-----|--------------|------------|-------------------------------------|----------------|-----------------------|---------------------------------------------------------------------------------------------------------------------------------------------------------------------------------------------------------------------------------------------------------------------------------------------------------------------------|
|     |              |            |                                     | (kcal/mol)     | ( $\mu$ M)            |                                                                                                                                                                                                                                                                                                                           |
| 67  | Isorhamnetin | 5281654    | Main Protease (MPro)                | -7.52          | 3.08                  | Met <sup>6</sup> , Ala <sup>7</sup> , Phe <sup>8</sup> , Pro <sup>9</sup> , Ser <sup>113</sup> , Gln <sup>127</sup> , Asp <sup>295</sup> , Arg <sup>298</sup> , Gln <sup>299</sup> , Gly <sup>302</sup> , Val <sup>303</sup> , Thr <sup>304</sup>                                                                         |
|     |              |            | Papain like protease (PLPro)        | -8.46          | 0.63                  | Arg <sup>166</sup> , Ser <sup>170</sup> , Leu <sup>199</sup> , Val <sup>202</sup> , Glu <sup>203</sup> , Met <sup>206</sup> , Tyr <sup>207</sup> , Met <sup>208</sup> , Lys <sup>232</sup>                                                                                                                                |
|     |              |            | RNA-dependent RNA polymerase (RdRP) | -7.42          | 3.66                  | Thr <sup>591</sup> , Ser <sup>592</sup> , Lys <sup>593</sup> , Phe <sup>594</sup> , Gln <sup>815</sup> , Pro <sup>830</sup> , Tyr <sup>831</sup> , Pro <sup>832</sup> , Asp <sup>865</sup> , Pro <sup>868</sup> , Trp <sup>916</sup>                                                                                      |
|     |              |            | Helicase                            | -7.51          | 3.116                 | Asn <sup>177</sup> , Arg <sup>178</sup> , Glu <sup>201</sup> , Lys <sup>202</sup> , Gly <sup>203</sup> , Tyr <sup>515</sup> , Asn <sup>516</sup> , Asn <sup>519</sup> , Ala <sup>520</sup> , Thr <sup>530</sup> , Thr <sup>532</sup> , Asp <sup>534</sup>                                                                 |
|     |              |            | E-channel proteins                  | -6.9           | 8.73                  | Leu <sup>28</sup> , Leu <sup>31</sup> , Ala <sup>32</sup> , Thr <sup>35</sup> , Ala <sup>36</sup> , Arg <sup>38</sup>                                                                                                                                                                                                     |
|     |              |            | Spike Open Protein                  | -6.62          | 14.14                 | Lys <sup>535</sup> , Glu <sup>554</sup> , Ser <sup>555</sup> , Asn <sup>556</sup> , Lys <sup>557</sup> , Lys <sup>558</sup> , Phe <sup>559</sup> , Arg <sup>577</sup> , Leu <sup>582</sup> , Glu <sup>583</sup> , Ile <sup>584</sup> , Leu <sup>585</sup>                                                                 |
|     |              |            | Spike Close Protein                 | -6.84          | 9.65                  | Met <sup>740</sup> , Tyr <sup>741</sup> , Ile <sup>742</sup> , Cys <sup>743</sup> , Gly <sup>744</sup> , Lys <sup>854</sup> , Asn <sup>856</sup> , Val <sup>963</sup> , Lys <sup>964</sup> , Leu <sup>966</sup> , Ser <sup>967</sup> , Val <sup>976</sup> , Leu <sup>977</sup> , Asn <sup>978</sup> , Arg <sup>1000</sup> |
| 68  | Kaempferol   | 5280863    | Main Protease (MPro)                | -7.66          | 2.44                  | Met <sup>6</sup> , Ala <sup>7</sup> , Phe <sup>8</sup> , Pro <sup>9</sup> , Ser <sup>113</sup> , Gln <sup>127</sup> , Asp <sup>295</sup> , Arg <sup>298</sup> , Gln <sup>299</sup> , Gly <sup>302</sup> , Val <sup>303</sup> , Thr <sup>304</sup>                                                                         |
|     |              |            | Papain like protease (PLPro)        | -8.13          | 1.1                   | Arg <sup>166</sup> , Ser <sup>170</sup> , Val <sup>202</sup> , Glu <sup>203</sup> , Met <sup>206</sup> , Tyr <sup>207</sup> , Met <sup>208</sup> , Lys <sup>232</sup>                                                                                                                                                     |
|     |              |            | RNA-dependent RNA polymerase (RdRP) | -7.14          | 5.83                  | Tyr <sup>32</sup> , Lys <sup>47</sup> , Tyr <sup>129</sup> , His <sup>133</sup> , Asp <sup>135</sup> , Asn <sup>138</sup> , Lys <sup>780</sup> , Asn <sup>781</sup> , Ser <sup>784</sup>                                                                                                                                  |
|     |              |            | Helicase                            | -7.48          | 3.317                 | Ala <sup>135</sup> , Leu <sup>138</sup> , Lys <sup>139</sup> , Glu <sup>142</sup> , Asn <sup>179</sup> , Thr <sup>380</sup> , Tyr <sup>382</sup> , Asp <sup>383</sup> , Ala <sup>407</sup> , Pro <sup>408</sup> , Arg <sup>409</sup> , Thr <sup>410</sup>                                                                 |
|     |              |            | E-channel proteins                  | -7.02          | 7.13                  | No binding site was found                                                                                                                                                                                                                                                                                                 |
|     |              |            | Spike Open Protein                  | -6.82          | 9.97                  | Lys <sup>535</sup> , Glu <sup>554</sup> , Ser <sup>555</sup> , Asn <sup>556</sup> , Lys <sup>557</sup> , Lys <sup>558</sup> , Phe <sup>559</sup> , Arg <sup>577</sup> , Leu <sup>582</sup> , Glu <sup>583</sup> , Ile <sup>584</sup> , Leu <sup>585</sup>                                                                 |
|     |              |            | Spike Close Protein                 | -7.31          | 4.37                  | Leu <sup>335</sup> , Cys <sup>336</sup> , Phe <sup>338</sup> , Gly <sup>339</sup> , Phe <sup>342</sup> , Asn <sup>343</sup> , Ala <sup>363</sup> , Asp <sup>364</sup> , Val <sup>367</sup> , Leu <sup>368</sup> , Ser <sup>371</sup> , Ser <sup>373</sup> , Phe <sup>374</sup>                                            |
|     |              |            | Main Protease (MPro)                | -5.99          | 41.01                 | Phe <sup>8</sup> , Lys <sup>102</sup> , Val <sup>104</sup> , Arg <sup>105</sup> , Ile <sup>106</sup> , Gln <sup>107</sup> , Gln <sup>110</sup> , Thr <sup>111</sup> , Phe <sup>112</sup> , Asn <sup>151</sup> , Ile <sup>152</sup> , Asp <sup>153</sup> , Ser <sup>158</sup> , Phe <sup>294</sup> , Arg <sup>298</sup>    |

| Sr. | Ligands     | PubChem ID | Proteins                            | Binding energy | Dissociation Constant | Active site residues                                                                                                                                                                                                                                                                                                                                                                                                                                 |
|-----|-------------|------------|-------------------------------------|----------------|-----------------------|------------------------------------------------------------------------------------------------------------------------------------------------------------------------------------------------------------------------------------------------------------------------------------------------------------------------------------------------------------------------------------------------------------------------------------------------------|
|     |             |            |                                     | (kcal/mol)     | ( $\mu$ M)            |                                                                                                                                                                                                                                                                                                                                                                                                                                                      |
| 69  | Kanzonol Y  | 10001604   | Papain like protease (PLPro)        | -9.37          | 0.14                  | Cys <sup>155</sup> , Asn <sup>156</sup> , Lys <sup>157</sup> , Glu <sup>161</sup> , Leu <sup>162</sup> , Gly <sup>163</sup> , Asp <sup>164</sup> , Glu <sup>167</sup> , Tyr <sup>171</sup> , Tyr <sup>268</sup> , Gln <sup>269</sup>                                                                                                                                                                                                                 |
|     |             |            | RNA-dependent RNA polymerase (RdRP) | -7.06          | 6.68                  | Ala <sup>46</sup> , Lys <sup>47</sup> , Tyr <sup>129</sup> , Ala <sup>130</sup> , His <sup>133</sup> , Phe <sup>134</sup> , Asp <sup>135</sup> , Asn <sup>138</sup> , Cys <sup>139</sup> , Thr <sup>141</sup> , Leu <sup>142</sup> , Ala <sup>706</sup> , Ser <sup>709</sup> , Thr <sup>710</sup> , Asp <sup>711</sup> , Gln <sup>773</sup> , Gly <sup>774</sup> , Ser <sup>778</sup> , Lys <sup>780</sup> , Asn <sup>781</sup> , Ser <sup>784</sup> |
|     |             |            | Helicase                            | -7.58          | 2.797                 | Ala <sup>4</sup> , Cys <sup>5</sup> , Val <sup>6</sup> , Arg <sup>21</sup> , Arg <sup>22</sup> , Pro <sup>23</sup> , Phe <sup>24</sup> , Arg <sup>129</sup> , Leu <sup>132</sup> , Phe <sup>133</sup> , Glu <sup>136</sup> , Pro <sup>234</sup> , Leu <sup>235</sup> , Ser <sup>236</sup>                                                                                                                                                            |
|     |             |            | E-channel proteins                  | -7.8           | 1.91                  | Leu <sup>19</sup> , Ala <sup>22</sup> , Phe <sup>23</sup> , Phe <sup>26</sup>                                                                                                                                                                                                                                                                                                                                                                        |
|     |             |            | Spike Open Protein                  | -5.39          | 112.15                | Trp <sup>886</sup> , Gly <sup>889</sup> , Ala <sup>890</sup> , Tyr <sup>904</sup> , Ser <sup>1030</sup> , Glu <sup>1031</sup> , Leu <sup>1034</sup> , Gly <sup>1035</sup> , Gln <sup>1036</sup> , Ser <sup>1037</sup> , Lys <sup>1038</sup>                                                                                                                                                                                                          |
|     |             |            | Spike Close Protein                 | -6.94          | 8.14                  | Arg <sup>102</sup> , Gly <sup>103</sup> , Trp <sup>104</sup> , Ile <sup>119</sup> , Asn <sup>121</sup> , Val <sup>126</sup> , Ile <sup>128</sup> , Tyr <sup>170</sup> , Ser <sup>172</sup> , Arg <sup>190</sup> , Phe <sup>192</sup> , Phe <sup>194</sup> , Ile <sup>203</sup> , Ser <sup>205</sup> , His <sup>207</sup> , Leu <sup>226</sup> , Val <sup>227</sup>                                                                                   |
| 70  | Lauric acid | 3893       | Main Protease (MPro)                | -4.17          | 877.71                | His <sup>41</sup> , Ser <sup>46</sup> , Met <sup>49</sup> , Cys <sup>145</sup> , His <sup>164</sup> , Met <sup>165</sup> , Glu <sup>166</sup> , Leu <sup>167</sup> , Pro <sup>168</sup> , Arg <sup>188</sup> , Gln <sup>189</sup> , Thr <sup>190</sup> , Gln <sup>192</sup>                                                                                                                                                                          |
|     |             |            | Papain like protease (PLPro)        | -5.28          | 133.9                 | Asp <sup>164</sup> , Val <sup>165</sup> , Arg <sup>166</sup> , Met <sup>208</sup> , Pro <sup>247</sup> , Pro <sup>248</sup> , Tyr <sup>264</sup> , Gly <sup>266</sup> , Asn <sup>267</sup> , Tyr <sup>268</sup> , Tyr <sup>273</sup> , Thr <sup>301</sup>                                                                                                                                                                                            |
|     |             |            | RNA-dependent RNA polymerase (RdRP) | -4.74          | 335.94                | Val <sup>335</sup> , Asp <sup>336</sup> , Val <sup>338</sup> , Phe <sup>340</sup> , Arg <sup>365</sup> , Leu <sup>366</sup>                                                                                                                                                                                                                                                                                                                          |
|     |             |            | Helicase                            | -4.91          | 253.856               | Pro <sup>406</sup> , Ala <sup>407</sup> , Pro <sup>408</sup> , Arg <sup>409</sup> , Leu <sup>412</sup> , Thr <sup>413</sup> , Gly <sup>415</sup> , Thr <sup>416</sup> , Leu <sup>417</sup> , Glu <sup>418</sup> , Pro <sup>419</sup> , Phe <sup>422</sup> , His <sup>554</sup> , Asn <sup>557</sup> , Asn <sup>559</sup> , Arg <sup>560</sup>                                                                                                        |
|     |             |            | E-channel proteins                  | -5.12          | 176.6                 | No binding site was found                                                                                                                                                                                                                                                                                                                                                                                                                            |
|     |             |            | Spike Open Protein                  | -5.12          | 177.2                 | Asn <sup>99</sup> , Arg <sup>102</sup> , Gly <sup>103</sup> , Trp <sup>104</sup> , Ile <sup>119</sup> , Asn <sup>121</sup> , Val <sup>126</sup> , Ile <sup>128</sup> , Arg <sup>190</sup> , Phe <sup>192</sup> , Phe <sup>194</sup> , Ile <sup>203</sup> , Ser <sup>205</sup> , His <sup>207</sup> , Leu <sup>226</sup> , Val <sup>227</sup>                                                                                                         |
|     |             |            | Spike Close Protein                 | -5.08          | 187.98                | Glu <sup>96</sup> , Asn <sup>99</sup> , Ile <sup>101</sup> , Arg <sup>102</sup> , Trp <sup>104</sup> , Ile <sup>119</sup> , Asn <sup>121</sup> , Val <sup>126</sup> , Ile <sup>128</sup> , Arg <sup>190</sup> , Phe <sup>192</sup> , Phe <sup>194</sup> , Ile <sup>203</sup> , Leu <sup>226</sup> , Val <sup>227</sup>                                                                                                                               |

| Sr. | Ligands        | PubChem ID | Proteins                            | Binding energy | Dissociation Constant | Active site residues                                                                                                                                                                                                                                                                                                                          |
|-----|----------------|------------|-------------------------------------|----------------|-----------------------|-----------------------------------------------------------------------------------------------------------------------------------------------------------------------------------------------------------------------------------------------------------------------------------------------------------------------------------------------|
|     |                |            |                                     | (kcal/mol)     | ( $\mu$ M)            |                                                                                                                                                                                                                                                                                                                                               |
| 71  | Linoleic acid  | 5280450    | Main Protease (MPro)                | -4.56          | 453.67                | Trp <sup>218</sup> , Phe <sup>219</sup> , Leu <sup>220</sup> , Asn <sup>221</sup> , Arg <sup>222</sup> , Phe <sup>223</sup> , Ser <sup>267</sup> , Glu <sup>270</sup> , Leu <sup>271</sup> , Asn <sup>274</sup> , Gly <sup>275</sup> , Met <sup>276</sup> , Asn <sup>277</sup>                                                                |
|     |                |            | Papain like protease (PLPro)        | -6.66          | 13.08                 | Lys <sup>157</sup> , Leu <sup>162</sup> , Gly <sup>163</sup> , Asp <sup>164</sup> , Met <sup>208</sup> , Pro <sup>247</sup> , Pro <sup>248</sup> , Tyr <sup>264</sup> , Asn <sup>267</sup> , Tyr <sup>268</sup> , Gln <sup>269</sup> , Tyr <sup>273</sup> , Thr <sup>301</sup>                                                                |
|     |                |            | RNA-dependent RNA polymerase (RdRP) | -5.24          | 144.71                | Arg <sup>33</sup> , Ala <sup>34</sup> , Phe <sup>35</sup> , Ile <sup>37</sup> , Phe <sup>48</sup> , Leu <sup>49</sup> , Lys <sup>50</sup> , Lys <sup>73</sup> , Thr <sup>123</sup> , Asp <sup>208</sup> , Asn <sup>209</sup> , Tyr <sup>217</sup> , Asp <sup>218</sup> , Asn <sup>713</sup>                                                   |
|     |                |            | Helicase                            | -5.02          | 208.717               | Leu <sup>405</sup> , Pro <sup>406</sup> , Ala <sup>407</sup> , Pro <sup>408</sup> , Arg <sup>409</sup> , Leu <sup>412</sup> , Thr <sup>416</sup> , Leu <sup>417</sup> , Phe <sup>422</sup> , His <sup>554</sup> , Asn <sup>557</sup> , Asn <sup>559</sup> , Arg <sup>560</sup>                                                                |
|     |                |            | E-channel proteins                  | -6.24          | 26.71                 | No binding site was found                                                                                                                                                                                                                                                                                                                     |
|     |                |            | Spike Open Protein                  | -4.23          | 797.2                 | Arg <sup>355</sup> , Asn <sup>394</sup> , Tyr <sup>396</sup> , Pro <sup>426</sup> , Phe <sup>429</sup> , Thr <sup>430</sup> , Pro <sup>463</sup> , Phe <sup>464</sup> , Ser <sup>514</sup> , Phe <sup>515</sup> , Glu <sup>516</sup> , Leu <sup>517</sup>                                                                                     |
|     |                |            | Spike Close Protein                 | -5.68          | 69.09                 | Trp <sup>104</sup> , Ile <sup>119</sup> , Asn <sup>121</sup> , Val <sup>126</sup> , Ile <sup>128</sup> , Phe <sup>168</sup> , Tyr <sup>170</sup> , Ser <sup>172</sup> , Arg <sup>190</sup> , Phe <sup>192</sup> , Phe <sup>194</sup> , Ile <sup>203</sup> , Leu <sup>226</sup> , Val <sup>227</sup> , Leu <sup>229</sup>                      |
| 72  | Linolenic acid | 5280934    | Main Protease (MPro)                | -4.81          | 299.52                | Trp <sup>218</sup> , Phe <sup>219</sup> , Leu <sup>220</sup> , Asn <sup>221</sup> , Arg <sup>222</sup> , Phe <sup>223</sup> , Ser <sup>267</sup> , Glu <sup>270</sup> , Leu <sup>271</sup> , Asn <sup>274</sup> , Gly <sup>275</sup> , Met <sup>276</sup> , Asn <sup>277</sup> , Arg <sup>279</sup>                                           |
|     |                |            | Papain like protease (PLPro)        | -7.03          | 7.01                  | Asp <sup>164</sup> , Pro <sup>247</sup> , Pro <sup>248</sup> , Tyr <sup>264</sup> , Asn <sup>267</sup> , Tyr <sup>268</sup> , Tyr <sup>273</sup>                                                                                                                                                                                              |
|     |                |            | RNA-dependent RNA polymerase (RdRP) | -5.23          | 145.69                | Phe <sup>35</sup> , Asp <sup>36</sup> , Ile <sup>37</sup> , Tyr <sup>38</sup> , Asn <sup>39</sup> , Val <sup>42</sup> , Phe <sup>48</sup> , Leu <sup>49</sup> , Lys <sup>50</sup> , Thr <sup>206</sup> , Asp <sup>208</sup> , Asn <sup>713</sup>                                                                                              |
|     |                |            | Helicase                            | -5.25          | 141.807               | Ala <sup>4</sup> , Cys <sup>5</sup> , Val <sup>6</sup> , Arg <sup>15</sup> , Arg <sup>21</sup> , Arg <sup>22</sup> , Pro <sup>23</sup> , Phe <sup>24</sup> , Arg <sup>129</sup> , Leu <sup>132</sup> , Phe <sup>133</sup> , Glu <sup>136</sup> , Pro <sup>234</sup> , Leu <sup>235</sup> , Ser <sup>236</sup>                                 |
|     |                |            | E-channel proteins                  | -6.45          | 18.58                 | No binding site was found                                                                                                                                                                                                                                                                                                                     |
|     |                |            | Spike Open Protein                  | -4.68          | 369.87                | Leu <sup>390</sup> , Cys <sup>391</sup> , Leu <sup>517</sup> , His <sup>519</sup> , Phe <sup>543</sup> , Asn <sup>544</sup> , Gly <sup>545</sup> , Leu <sup>546</sup> , Thr <sup>547</sup> , Gln <sup>564</sup> , Phe <sup>565</sup> , Thr <sup>573</sup> , Val <sup>576</sup> , Arg <sup>577</sup> , Pro <sup>579</sup>                      |
|     |                |            | Spike Close Protein                 | -5.32          | 127.07                | Val <sup>382</sup> , Leu <sup>390</sup> , Cys <sup>391</sup> , Phe <sup>392</sup> , Thr <sup>393</sup> , Leu <sup>517</sup> , Leu <sup>518</sup> , His <sup>519</sup> , Ala <sup>520</sup> , Ala <sup>522</sup> , Phe <sup>543</sup> , Asn <sup>544</sup> , Gly <sup>545</sup> , Leu <sup>546</sup> , Thr <sup>547</sup> , Phe <sup>565</sup> |

| Sr. | Ligands        | PubChem ID | Proteins                            | Binding energy | Dissociation Constant | Active site residues                                                                                                                                                                                                                                                                                                                                               |
|-----|----------------|------------|-------------------------------------|----------------|-----------------------|--------------------------------------------------------------------------------------------------------------------------------------------------------------------------------------------------------------------------------------------------------------------------------------------------------------------------------------------------------------------|
|     |                |            |                                     | (kcal/mol)     | ( $\mu$ M)            |                                                                                                                                                                                                                                                                                                                                                                    |
| 73  | Liquiritigenin | 114829     | Main Protease (MPro)                | -7.04          | 6.89                  | Met <sup>6</sup> , Ala <sup>7</sup> , Phe <sup>8</sup> , Pro <sup>9</sup> , Ser <sup>113</sup> , Gln <sup>127</sup> , Asp <sup>295</sup> , Arg <sup>298</sup> , Gln <sup>299</sup> , Gly <sup>302</sup> , Val <sup>303</sup> , Thr <sup>304</sup>                                                                                                                  |
|     |                |            | Papain like protease (PLPro)        | -9.11          | 0.21                  | Thr <sup>74</sup> , Thr <sup>75</sup> , Asp <sup>76</sup> , Tyr <sup>154</sup> , Tyr <sup>171</sup> , Gln <sup>174</sup> , His <sup>175</sup>                                                                                                                                                                                                                      |
|     |                |            | RNA-dependent RNA polymerase (RdRP) | -6.95          | 8.03                  | Phe <sup>407</sup> , Gln <sup>408</sup> , Thr <sup>409</sup> , Asp <sup>445</sup> , Gly <sup>446</sup> , Asn <sup>447</sup>                                                                                                                                                                                                                                        |
|     |                |            | Helicase                            | -7.2           | 5.25                  | Asn <sup>179</sup> , Leu <sup>405</sup> , Pro <sup>406</sup> , Ala <sup>407</sup> , Pro <sup>408</sup> , Arg <sup>409</sup> , Leu <sup>412</sup> , Thr <sup>416</sup> , Leu <sup>417</sup> , Phe <sup>422</sup> , Asp <sup>534</sup> , Asn <sup>557</sup> , Asn <sup>559</sup> , Arg <sup>560</sup>                                                                |
|     |                |            | E-channel proteins                  | -7.44          | 3.54                  | No binding site was found                                                                                                                                                                                                                                                                                                                                          |
|     |                |            | Spike Open Protein                  | -6.94          | 8.2                   | Tyr <sup>38</sup> , Asp <sup>40</sup> , Lys <sup>41</sup> , Val <sup>42</sup> , Phe <sup>43</sup> , Arg <sup>44</sup> , Lys <sup>206</sup> , Glu <sup>224</sup> , Pro <sup>225</sup> , Tyr <sup>279</sup> , Gly <sup>283</sup> , Thr <sup>284</sup>                                                                                                                |
|     |                |            | Spike Close Protein                 | -7.13          | 5.93                  | Phe <sup>329</sup> , Pro <sup>330</sup> , Asn <sup>331</sup> , Ile <sup>332</sup> , Thr <sup>333</sup> , Leu <sup>335</sup> , Val <sup>362</sup> , Cys <sup>525</sup> , Gly <sup>526</sup> , Pro <sup>527</sup> , Lys <sup>528</sup> , Lys <sup>529</sup> , Ser <sup>530</sup> , Gln <sup>580</sup>                                                                |
| 74  | Luteolin       | 5280445    | Main Protease (MPro)                | -7.62          | 2.59                  | Met <sup>6</sup> , Ala <sup>7</sup> , Phe <sup>8</sup> , Pro <sup>9</sup> , Ser <sup>113</sup> , Gln <sup>127</sup> , Asp <sup>295</sup> , Arg <sup>298</sup> , Gln <sup>299</sup> , Gly <sup>302</sup> , Val <sup>303</sup> , Thr <sup>304</sup>                                                                                                                  |
|     |                |            | Papain like protease (PLPro)        | -8.47          | 0.62                  | Cys <sup>155</sup> , Asn <sup>156</sup> , Lys <sup>157</sup> , Glu <sup>161</sup> , Leu <sup>162</sup> , Gly <sup>163</sup> , Glu <sup>167</sup> , Tyr <sup>171</sup>                                                                                                                                                                                              |
|     |                |            | RNA-dependent RNA polymerase (RdRP) | -7.84          | 1.79                  | Phe <sup>407</sup> , Thr <sup>409</sup> , Asp <sup>445</sup> , Gly <sup>446</sup> , Asn <sup>447</sup>                                                                                                                                                                                                                                                             |
|     |                |            | Helicase                            | -7.83          | 1.831                 | Asn <sup>179</sup> , Tyr <sup>180</sup> , Leu <sup>405</sup> , Pro <sup>406</sup> , Pro <sup>408</sup> , Arg <sup>409</sup> , Thr <sup>410</sup> , Leu <sup>411</sup> , Leu <sup>412</sup> , Thr <sup>413</sup> , Thr <sup>416</sup> , Leu <sup>417</sup> , Phe <sup>422</sup> , Asn <sup>557</sup> , Asn <sup>559</sup> , Arg <sup>560</sup>                      |
|     |                |            | E-channel proteins                  | -7.36          | 4.04                  | Ile <sup>46</sup> , Ser <sup>50</sup> , Leu <sup>51</sup> , Pro <sup>54</sup> , Phe <sup>56</sup> , Tyr <sup>57</sup>                                                                                                                                                                                                                                              |
|     |                |            | Spike Open Protein                  | -7.05          | 6.83                  | Arg <sup>355</sup> , Asn <sup>394</sup> , Tyr <sup>396</sup> , Pro <sup>426</sup> , Asp <sup>428</sup> , Phe <sup>429</sup> , Thr <sup>430</sup> , Phe <sup>464</sup> , Ser <sup>514</sup> , Phe <sup>515</sup> , Glu <sup>516</sup> , Leu <sup>517</sup> , Leu <sup>518</sup>                                                                                     |
|     |                |            | Spike Close Protein                 | -7.28          | 4.64                  | Val <sup>382</sup> , Leu <sup>390</sup> , Cys <sup>391</sup> , Phe <sup>392</sup> , Thr <sup>393</sup> , Glu <sup>516</sup> , Leu <sup>517</sup> , Leu <sup>518</sup> , His <sup>519</sup> , Ala <sup>520</sup> , Pro <sup>521</sup> , Ala <sup>522</sup> , Asn <sup>544</sup> , Gly <sup>545</sup> , Leu <sup>546</sup> , Thr <sup>547</sup> , Phe <sup>565</sup> |
|     |                |            | Main Protease (MPro)                | -4.65          | 391.05                | Ile <sup>106</sup> , Gln <sup>110</sup> , Thr <sup>111</sup> , Asn <sup>151</sup> , Thr <sup>292</sup> , Phe <sup>294</sup> , Asp <sup>295</sup> , Arg <sup>298</sup>                                                                                                                                                                                              |
|     |                |            | Papain like protease (PLPro)        | -6.01          | 39.06                 | Asp <sup>164</sup> , Tyr <sup>268</sup>                                                                                                                                                                                                                                                                                                                            |

| Sr. | Ligands       | PubChem ID | Proteins                            | Binding energy | Dissociation Constant | Active site residues                                                                                                                                                                                                                                                                                                                                              |
|-----|---------------|------------|-------------------------------------|----------------|-----------------------|-------------------------------------------------------------------------------------------------------------------------------------------------------------------------------------------------------------------------------------------------------------------------------------------------------------------------------------------------------------------|
|     |               |            |                                     | (kcal/mol)     | ( $\mu$ M)            |                                                                                                                                                                                                                                                                                                                                                                   |
| 75  | Malic acid    | 525        | RNA-dependent RNA polymerase (RdRP) | -5.5           | 92.52                 | Arg <sup>305</sup> , Arg <sup>467</sup> , Leu <sup>470</sup> , Phe <sup>471</sup> , Glu <sup>474</sup> , Cys <sup>730</sup> , Leu <sup>731</sup> , Arg <sup>733</sup> , Asn <sup>734</sup> , Arg <sup>735</sup> , Asp <sup>736</sup> , Val <sup>737</sup>                                                                                                         |
|     |               |            | Helicase                            | -5.63          | 75.177                | Tyr <sup>120</sup> , Ala <sup>123</sup> , Asn <sup>124</sup> , Lys <sup>131</sup> , Ala <sup>135</sup> , Leu <sup>138</sup> , Thr <sup>380</sup> , Asn <sup>381</sup> , Tyr <sup>382</sup> , Arg <sup>409</sup> , Tyr <sup>421</sup> , Phe <sup>422</sup> , Asn <sup>423</sup>                                                                                    |
|     |               |            | E-channel proteins                  | -4.05          | 1078.39               | No binding site was found                                                                                                                                                                                                                                                                                                                                         |
|     |               |            | Spike Open Protein                  | -4.82          | 294.5                 | Ser <sup>730</sup> , Thr <sup>778</sup> , Pro <sup>863</sup> , Leu <sup>865</sup> , Asp <sup>867</sup> , Ile <sup>870</sup> , Ala <sup>1056</sup> , Pro <sup>1057</sup> , His <sup>1058</sup>                                                                                                                                                                     |
|     |               |            | Spike Close Protein                 | -4.88          | 266.59                | Leu <sup>390</sup> , Cys <sup>391</sup> , Leu <sup>517</sup> , Leu <sup>518</sup> , His <sup>519</sup> , Ala <sup>520</sup> , Ala <sup>522</sup> , Phe <sup>543</sup> , Asn <sup>544</sup> , Gly <sup>545</sup> , Leu <sup>546</sup> , Phe <sup>565</sup>                                                                                                         |
| 76  | Margaric acid | 10465      | Main Protease (MPro)                | -3.91          | 1354.36               | Trp <sup>218</sup> , Phe <sup>219</sup> , Leu <sup>220</sup> , Asn <sup>221</sup> , Arg <sup>222</sup> , Phe <sup>223</sup> , Ser <sup>267</sup> , Glu <sup>270</sup> , Leu <sup>271</sup> , Asn <sup>274</sup> , Gly <sup>275</sup> , Asn <sup>277</sup>                                                                                                         |
|     |               |            | Papain like protease (PLPro)        | -5.91          | 46.79                 | Asp <sup>164</sup> , Pro <sup>247</sup> , Pro <sup>248</sup> , Tyr <sup>264</sup> , Tyr <sup>268</sup> , Tyr <sup>273</sup> , Thr <sup>301</sup>                                                                                                                                                                                                                  |
|     |               |            | RNA-dependent RNA polymerase (RdRP) | -4.62          | 408.6                 | Glu <sup>474</sup> , Asp <sup>477</sup> , Lys <sup>478</sup> , Phe <sup>480</sup> , Asp <sup>481</sup> , Val <sup>637</sup> , Arg <sup>640</sup> , Lys <sup>641</sup> , Thr <sup>643</sup> , Val <sup>737</sup> , Thr <sup>739</sup> , Val <sup>742</sup> , Asn <sup>743</sup>                                                                                    |
|     |               |            | Helicase                            | -4.72          | 345.14                | Ala <sup>4</sup> , Val <sup>6</sup> , Arg <sup>15</sup> , Arg <sup>21</sup> , Arg <sup>22</sup> , Pro <sup>23</sup> , Phe <sup>24</sup> , Arg <sup>129</sup> , Leu <sup>132</sup> , Phe <sup>133</sup> , Glu <sup>136</sup> , Pro <sup>234</sup> , Leu <sup>235</sup> , Ser <sup>236</sup>                                                                        |
|     |               |            | E-channel proteins                  | -5.51          | 92.21                 | No binding site was found                                                                                                                                                                                                                                                                                                                                         |
|     |               |            | Spike Open Protein                  | -3.7           | 1943.56               | Asn <sup>394</sup> , Tyr <sup>396</sup> , Pro <sup>426</sup> , Asp <sup>428</sup> , Phe <sup>429</sup> , Thr <sup>430</sup> , Pro <sup>463</sup> , Phe <sup>464</sup> , Ser <sup>514</sup> , Phe <sup>515</sup> , Glu <sup>516</sup> , Leu <sup>517</sup> , Leu <sup>518</sup>                                                                                    |
|     |               |            | Spike Close Protein                 | -5.04          | 203.5                 | Trp <sup>104</sup> , Ile <sup>119</sup> , Val <sup>126</sup> , Ile <sup>128</sup> , Phe <sup>168</sup> , Tyr <sup>170</sup> , Ser <sup>172</sup> , Phe <sup>192</sup> , Phe <sup>194</sup> , Ile <sup>203</sup> , Leu <sup>226</sup> , Val <sup>227</sup> , Asp <sup>228</sup> , Leu <sup>229</sup>                                                               |
|     |               |            | Main Protease (MPro)                | -7.53          | 3.03                  | Met <sup>49</sup> , Phe <sup>140</sup> , Leu <sup>141</sup> , Asn <sup>142</sup> , Gly <sup>143</sup> , Ser <sup>144</sup> , Cys <sup>145</sup> , His <sup>163</sup> , Met <sup>165</sup> , Glu <sup>166</sup> , Leu <sup>167</sup> , Pro <sup>168</sup> , His <sup>172</sup> , Arg <sup>188</sup> , Gln <sup>189</sup> , Thr <sup>190</sup> , Gln <sup>192</sup> |
|     |               |            | Papain like protease (PLPro)        | -9.65          | 0.09                  | Thr <sup>74</sup> , Thr <sup>75</sup> , Asp <sup>76</sup> , Arg <sup>82</sup> , Tyr <sup>154</sup> , Asn <sup>156</sup> , Tyr <sup>171</sup> , Gln <sup>174</sup> , His <sup>175</sup>                                                                                                                                                                            |

| Sr. | Ligands       | PubChem ID | Proteins                            | Binding energy | Dissociation Constant | Active site residues                                                                                                                                                                                                                                                                                                                                               |
|-----|---------------|------------|-------------------------------------|----------------|-----------------------|--------------------------------------------------------------------------------------------------------------------------------------------------------------------------------------------------------------------------------------------------------------------------------------------------------------------------------------------------------------------|
|     |               |            |                                     | (kcal/mol)     | ( $\mu$ M)            |                                                                                                                                                                                                                                                                                                                                                                    |
| 77  | Myricetin     | 5281672    | RNA-dependent RNA polymerase (RdRP) | -7.66          | 2.44                  | Asp <sup>452</sup> , Tyr <sup>456</sup> , Arg <sup>553</sup> , Ala <sup>554</sup> , Arg <sup>555</sup> , Thr <sup>556</sup> , Val <sup>557</sup> , Ala <sup>558</sup> , Lys <sup>621</sup> , Cys <sup>622</sup> , Asp <sup>623</sup> , Arg <sup>624</sup> , Lys <sup>676</sup> , Thr <sup>680</sup> , Ser <sup>681</sup> , Ser <sup>682</sup> , Gly <sup>683</sup> |
|     |               |            | Helicase                            | -7.68          | 2.331                 | Asn <sup>177</sup> , Arg <sup>178</sup> , Glu <sup>201</sup> , Tyr <sup>515</sup> , Asn <sup>516</sup> , Asn <sup>519</sup> , Ala <sup>520</sup> , Thr <sup>530</sup> , Gln <sup>531</sup> , Thr <sup>532</sup> , Asp <sup>534</sup>                                                                                                                               |
|     |               |            | E-channel proteins                  | -6.85          | 9.49                  | Leu <sup>28</sup> , Leu <sup>31</sup> , Ala <sup>32</sup> , Thr <sup>35</sup> , Ala <sup>36</sup> , Arg <sup>38</sup>                                                                                                                                                                                                                                              |
|     |               |            | Spike Open Protein                  | -7.12          | 6.05                  | Ser <sup>730</sup> , Met <sup>731</sup> , Thr <sup>732</sup> , Lys <sup>733</sup> , Thr <sup>778</sup> , Val <sup>860</sup> , Leu <sup>861</sup> , Pro <sup>862</sup> , Pro <sup>863</sup> , Asp <sup>867</sup> , Ile <sup>870</sup> , Ala <sup>1056</sup> , Pro <sup>1057</sup> , His <sup>1058</sup> , Gly <sup>1059</sup>                                       |
|     |               |            | Spike Close Protein                 | -7.33          | 4.22                  | Met <sup>740</sup> , Tyr <sup>741</sup> , Ile <sup>742</sup> , Cys <sup>743</sup> , Gly <sup>744</sup> , Asn <sup>856</sup> , Val <sup>963</sup> , Lys <sup>964</sup> , Leu <sup>966</sup> , Ser <sup>967</sup> , Ser <sup>975</sup> , Val <sup>976</sup> , Leu <sup>977</sup> , Asn <sup>978</sup> , Arg <sup>1000</sup>                                          |
| 78  | Myristic acid | 11005      | Main Protease (MPro)                | -4.03          | 1107.91               | Trp <sup>218</sup> , Phe <sup>219</sup> , Leu <sup>220</sup> , Asn <sup>221</sup> , Phe <sup>223</sup> , Ser <sup>267</sup> , Glu <sup>270</sup> , Leu <sup>271</sup> , Asn <sup>274</sup> , Gly <sup>275</sup> , Met <sup>276</sup> , Asn <sup>277</sup> , Arg <sup>279</sup>                                                                                     |
|     |               |            | Papain like protease (PLPro)        | -5.52          | 89.3                  | No binding site was found                                                                                                                                                                                                                                                                                                                                          |
|     |               |            | RNA-dependent RNA polymerase (RdRP) | -4.45          | 548.07                | Phe <sup>35</sup> , Asp <sup>36</sup> , Ile <sup>37</sup> , Asn <sup>39</sup> , Val <sup>42</sup> , Phe <sup>48</sup> , Lys <sup>50</sup> , Thr <sup>206</sup> , Asp <sup>208</sup> , Asn <sup>209</sup> , Asp <sup>218</sup> , Asp <sup>221</sup> , Asn <sup>713</sup>                                                                                            |
|     |               |            | Helicase                            | -4.66          | 386.462               | Leu <sup>405</sup> , Pro <sup>406</sup> , Ala <sup>407</sup> , Pro <sup>408</sup> , Arg <sup>409</sup> , Leu <sup>412</sup> , Thr <sup>416</sup> , Leu <sup>417</sup> , Phe <sup>422</sup> , Asn <sup>557</sup> , Asn <sup>559</sup> , Arg <sup>560</sup>                                                                                                          |
|     |               |            | E-channel proteins                  | -4.85          | 280.44                | No binding site was found                                                                                                                                                                                                                                                                                                                                          |
|     |               |            | Spike Open Protein                  | -3.71          | 1923.97               | His <sup>1101</sup> , Trp <sup>1102</sup> , Phe <sup>1103</sup> , Ile <sup>1114</sup> , Ile <sup>1115</sup> , Asn <sup>1135</sup> , Thr <sup>1136</sup> , Tyr <sup>1138</sup>                                                                                                                                                                                      |
|     |               |            | Spike Close Protein                 | -4.9           | 256.87                | Tyr <sup>38</sup> , Asp <sup>40</sup> , Lys <sup>41</sup> , Val <sup>42</sup> , Phe <sup>43</sup> , Arg <sup>44</sup> , Glu <sup>224</sup> , Pro <sup>225</sup> , Tyr <sup>279</sup> , Asn <sup>282</sup> , Gly <sup>283</sup> , Thr <sup>284</sup>                                                                                                                |
|     |               |            | Main Protease (MPro)                | -4.51          | 496.96                | Phe <sup>8</sup> , Val <sup>104</sup> , Arg <sup>105</sup> , Ile <sup>106</sup> , Gln <sup>107</sup> , Gln <sup>110</sup> , Thr <sup>111</sup> , Asn <sup>151</sup> , Asp <sup>153</sup> , Ser <sup>158</sup> , Thr <sup>292</sup> , Phe <sup>294</sup> , Asp <sup>295</sup> , Arg <sup>298</sup>                                                                  |
|     |               |            | Papain like protease (PLPro)        | -5.82          | 54.46                 | Asp <sup>164</sup> , Arg <sup>166</sup> , Met <sup>208</sup> , Ser <sup>245</sup> , Ala <sup>246</sup> , Pro <sup>247</sup> , Pro <sup>248</sup> , Tyr <sup>268</sup> , Thr <sup>301</sup> , Asp <sup>302</sup>                                                                                                                                                    |



| Sr. | Ligands          | PubChem ID | Proteins                            | Binding energy | Dissociation Constant | Active site residues                                                                                                                                                                                                                                                                                                                                                                                                                                   |
|-----|------------------|------------|-------------------------------------|----------------|-----------------------|--------------------------------------------------------------------------------------------------------------------------------------------------------------------------------------------------------------------------------------------------------------------------------------------------------------------------------------------------------------------------------------------------------------------------------------------------------|
|     |                  |            |                                     | (kcal/mol)     | ( $\mu$ M)            |                                                                                                                                                                                                                                                                                                                                                                                                                                                        |
| 79  | Myristoleic acid | 5281119    | RNA-dependent RNA polymerase (RdRP) | -5.32          | 125.16                | Val <sup>335</sup> , Asp <sup>336</sup> , Val <sup>338</sup> , Phe <sup>340</sup> , Leu <sup>366</sup>                                                                                                                                                                                                                                                                                                                                                 |
|     |                  |            | Helicase                            | -4.86          | 273.426               | Pro <sup>406</sup> , Ala <sup>407</sup> , Pro <sup>408</sup> , Arg <sup>409</sup> , Leu <sup>412</sup> , Thr <sup>416</sup> , Leu <sup>417</sup> , Pro <sup>419</sup> , Phe <sup>422</sup> , His <sup>554</sup> , Asn <sup>557</sup> , Asn <sup>559</sup> , Arg <sup>560</sup>                                                                                                                                                                         |
|     |                  |            | E-channel proteins                  | -5.48          | 95.7                  | No binding site was found                                                                                                                                                                                                                                                                                                                                                                                                                              |
|     |                  |            | Spike Open Protein                  | -5.28          | 135.26                | Ser <sup>94</sup> , Glu <sup>96</sup> , Ile <sup>101</sup> , Arg <sup>102</sup> , Gly <sup>103</sup> , Trp <sup>104</sup> , Ile <sup>119</sup> , Asn <sup>121</sup> , Val <sup>126</sup> , Ile <sup>128</sup> , Arg <sup>190</sup> , Phe <sup>192</sup> , Phe <sup>194</sup> , Ile <sup>203</sup> , Ser <sup>205</sup> , His <sup>207</sup> , Leu <sup>226</sup> , Val <sup>227</sup>                                                                  |
|     |                  |            | Spike Close Protein                 | -5.43          | 104.48                | Glu <sup>96</sup> , Asn <sup>99</sup> , Ile <sup>101</sup> , Arg <sup>102</sup> , Trp <sup>104</sup> , Ile <sup>119</sup> , Asn <sup>121</sup> , Val <sup>126</sup> , Ile <sup>128</sup> , Arg <sup>190</sup> , Phe <sup>192</sup> , Phe <sup>194</sup> , Ile <sup>203</sup> , Ser <sup>205</sup> , Leu <sup>226</sup> , Val <sup>227</sup>                                                                                                            |
| 80  | Naringen         | 442428     | Main Protease (MPro)                | -8.05          | 1.26                  | Thr <sup>24</sup> , Thr <sup>25</sup> , Thr <sup>26</sup> , Leu <sup>27</sup> , His <sup>41</sup> , Thr <sup>45</sup> , Ser <sup>46</sup> , Met <sup>49</sup> , Asn <sup>142</sup> , Gly <sup>143</sup> , Ser <sup>144</sup> , Cys <sup>145</sup> , His <sup>164</sup> , Met <sup>165</sup> , Glu <sup>166</sup> , Leu <sup>167</sup> , Pro <sup>168</sup> , Arg <sup>188</sup> , Gln <sup>189</sup> , Thr <sup>190</sup> , Gln <sup>192</sup>         |
|     |                  |            | Papain like protease (PLPro)        | -10.17         | 0.04                  | Cys <sup>155</sup> , Asn <sup>156</sup> , Glu <sup>161</sup> , Leu <sup>162</sup> , Gly <sup>163</sup> , Asp <sup>164</sup> , Arg <sup>166</sup> , Gln <sup>167</sup> , Ser <sup>170</sup> , Leu <sup>185</sup> ,                                                                                                                                                                                                                                      |
|     |                  |            |                                     |                |                       | Leu <sup>199</sup> , Val <sup>202</sup> , Glu <sup>203</sup> , Met <sup>206</sup> , Tyr <sup>207</sup> , Met <sup>208</sup> , Ile <sup>222</sup> , Pro <sup>223</sup> , Lys <sup>232</sup> , Tyr <sup>268</sup>                                                                                                                                                                                                                                        |
|     |                  |            | RNA-dependent RNA polymerase (RdRP) | -8.54          | 0.55                  | Tyr <sup>32</sup> , Lys <sup>47</sup> , Tyr <sup>129</sup> , His <sup>133</sup> , Phe <sup>134</sup> , Asp <sup>135</sup> , Asn <sup>138</sup> , Ser <sup>709</sup> , Thr <sup>710</sup> , Asp <sup>711</sup> , Lys <sup>714</sup> , Ala <sup>771</sup> , Ser <sup>772</sup> , Gln <sup>773</sup> , Gly <sup>774</sup> , Ser <sup>778</sup> , Lys <sup>780</sup> , Asn <sup>781</sup> , Ser <sup>784</sup>                                             |
|     |                  |            | Helicase                            | -8.42          | 0.673                 | Asn <sup>177</sup> , Asn <sup>179</sup> , Tyr <sup>180</sup> , Pro <sup>408</sup> , Arg <sup>409</sup> , Thr <sup>410</sup> , Leu <sup>412</sup> , Thr <sup>413</sup> , Gly <sup>415</sup> , Thr <sup>416</sup> , Leu <sup>417</sup> , Pro <sup>514</sup> , Tyr <sup>515</sup> , Asn <sup>516</sup> , Asn <sup>519</sup> , Thr <sup>532</sup> , Val <sup>533</sup> , Asp <sup>534</sup> , His <sup>554</sup> , Ser <sup>555</sup> , Arg <sup>560</sup> |
|     |                  |            | E-channel proteins                  | -8.53          | 0.56                  | Phe <sup>23</sup> , Phe <sup>26</sup> , Leu <sup>27</sup> , Val <sup>29</sup> , Thr <sup>30</sup> , Leu <sup>31</sup> , Ile <sup>33</sup> , Leu <sup>34</sup> , Leu <sup>39</sup> , Cys <sup>43</sup> , Ile <sup>46</sup> , Val <sup>47</sup>                                                                                                                                                                                                          |

| Sr. | Ligands             | PubChem ID | Proteins                            | Binding energy | Dissociation Constant | Active site residues                                                                                                                                                                                                                                                                                                                                                                                  |
|-----|---------------------|------------|-------------------------------------|----------------|-----------------------|-------------------------------------------------------------------------------------------------------------------------------------------------------------------------------------------------------------------------------------------------------------------------------------------------------------------------------------------------------------------------------------------------------|
|     |                     |            |                                     | (kcal/mol)     | ( $\mu$ M)            |                                                                                                                                                                                                                                                                                                                                                                                                       |
|     |                     |            | Spike Open Protein                  | -7.52          | 3.07                  | Pro <sup>330</sup> , Asn <sup>331</sup> , Ile <sup>332</sup> , Thr <sup>333</sup> , Asn <sup>334</sup> , Asn <sup>360</sup> , Pro <sup>521</sup> , Ala <sup>522</sup> , Thr <sup>523</sup> , Asn <sup>544</sup> , Gln <sup>564</sup> , Arg <sup>577</sup> , Asp <sup>578</sup> , Pro <sup>579</sup> , Gln <sup>580</sup> , Thr <sup>581</sup> , Leu <sup>582</sup>                                    |
|     |                     |            | Spike Close Protein                 | -7.64          | 2.52                  | His <sup>49</sup> , Met <sup>740</sup> , Tyr <sup>741</sup> , Ile <sup>742</sup> , Cys <sup>743</sup> , Gly <sup>744</sup> , Asn <sup>856</sup> , Val <sup>963</sup> , Lys <sup>964</sup> , Leu <sup>966</sup> , Ser <sup>967</sup> , Ser <sup>975</sup> , Val <sup>976</sup> , Leu <sup>977</sup> , Asn <sup>978</sup> , Arg <sup>1000</sup>                                                         |
| 81  | Naringenin          | 932        | Main Protease (MPro)                | -7.36          | 4.01                  | Met <sup>6</sup> , Ala <sup>7</sup> , Phe <sup>8</sup> , Pro <sup>9</sup> , Gln <sup>127</sup> , Asp <sup>295</sup> , Arg <sup>298</sup> , Gln <sup>299</sup> , Val <sup>303</sup> , Thr <sup>304</sup>                                                                                                                                                                                               |
|     |                     |            | Papain like protease (PLPro)        | -9.36          | 0.14                  | Phe <sup>69</sup> , His <sup>73</sup> , Thr <sup>74</sup> , Thr <sup>75</sup> , Asp <sup>76</sup> , Phe <sup>79</sup> , Arg <sup>82</sup> , Ala <sup>153</sup> , Tyr <sup>154</sup> , Asn <sup>156</sup> , Gln <sup>174</sup> , His <sup>175</sup>                                                                                                                                                    |
|     |                     |            | RNA-dependent RNA polymerase (RdRP) | -7.42          | 3.62                  | Thr <sup>591</sup> , Ser <sup>592</sup> , Lys <sup>593</sup> , Phe <sup>594</sup> , Gln <sup>815</sup> , Pro <sup>830</sup> , Tyr <sup>831</sup> , Pro <sup>832</sup> , Asp <sup>865</sup> , Pro <sup>868</sup> , Trp <sup>916</sup>                                                                                                                                                                  |
|     |                     |            | Helicase                            | -7.45          | 3.478                 | Pro <sup>175</sup> , Leu <sup>176</sup> , Asn <sup>177</sup> , Glu <sup>201</sup> , Lys <sup>202</sup> , Gly <sup>203</sup> , Asp <sup>204</sup> , Asn <sup>516</sup> , Asn <sup>519</sup> , Ala <sup>520</sup> , Thr <sup>530</sup> , Thr <sup>532</sup>                                                                                                                                             |
|     |                     |            | E-channel proteins                  | -7.4           | 3.75                  | Ile <sup>46</sup> , Leu <sup>51</sup> , Pro <sup>54</sup> , Phe <sup>56</sup> , Tyr <sup>57</sup>                                                                                                                                                                                                                                                                                                     |
|     |                     |            | Spike Open Protein                  | -6.61          | 14.4                  | Ser <sup>730</sup> , Thr <sup>732</sup> , Thr <sup>778</sup> , Phe <sup>823</sup> , Val <sup>860</sup> , Pro <sup>862</sup> , Pro <sup>863</sup> , Asp <sup>867</sup> , Ile <sup>870</sup> , Ala <sup>1056</sup> , Pro <sup>1057</sup> , His <sup>1058</sup> , Gly <sup>1059</sup>                                                                                                                    |
|     |                     |            | Spike Close Protein                 | -6.95          | 8.03                  | Tyr <sup>38</sup> , Asp <sup>40</sup> , Lys <sup>41</sup> , Val <sup>42</sup> , Phe <sup>43</sup> , Arg <sup>44</sup> , Glu <sup>224</sup> , Pro <sup>225</sup> , Leu <sup>226</sup> , Tyr <sup>279</sup> , Gly <sup>283</sup>                                                                                                                                                                        |
| 82  | Neochlorogenic acid | 5280633    | Main Protease (MPro)                | -8.04          | 1.28                  | Thr <sup>25</sup> , Leu <sup>27</sup> , His <sup>41</sup> , Cys <sup>44</sup> , Thr <sup>45</sup> , Ser <sup>46</sup> , Met <sup>49</sup> , Asn <sup>142</sup> , Gly <sup>143</sup> , Cys <sup>145</sup> , His <sup>164</sup> , Met <sup>165</sup> , Glu <sup>166</sup> , Leu <sup>167</sup> , Pro <sup>168</sup> , Arg <sup>188</sup> , Gln <sup>189</sup> , Thr <sup>190</sup> , Gln <sup>192</sup> |
|     |                     |            | Papain like protease (PLPro)        | -8.81          | 0.35                  | Arg <sup>183</sup> , Leu <sup>185</sup> , Val <sup>187</sup> , Gln <sup>195</sup> , Thr <sup>197</sup> , Leu <sup>199</sup> , Glu <sup>203</sup> , Met <sup>206</sup> , Tyr <sup>207</sup> , Met <sup>208</sup> , Ile <sup>222</sup> , Thr <sup>225</sup> , Lys <sup>232</sup>                                                                                                                        |
|     |                     |            | RNA-dependent RNA polymerase (RdRP) | -7.82          | 1.87                  | Tyr <sup>32</sup> , Ala <sup>46</sup> , Lys <sup>47</sup> , Tyr <sup>129</sup> , Ala <sup>130</sup> , His <sup>133</sup> , Phe <sup>134</sup> , Asp <sup>135</sup> , Asn <sup>138</sup> , Cys <sup>139</sup> , Asp <sup>140</sup> , Thr <sup>141</sup> , Leu <sup>142</sup> , Ser <sup>709</sup> , Thr <sup>710</sup> , Asp <sup>711</sup> , Lys <sup>714</sup>                                       |

| Sr. | Ligands      | PubChem ID | Proteins                            | Binding energy | Dissociation Constant | Active site residues                                                                                                                                                                                                                                                                                                                                             |
|-----|--------------|------------|-------------------------------------|----------------|-----------------------|------------------------------------------------------------------------------------------------------------------------------------------------------------------------------------------------------------------------------------------------------------------------------------------------------------------------------------------------------------------|
|     |              |            |                                     | (kcal/mol)     | ( $\mu$ M)            |                                                                                                                                                                                                                                                                                                                                                                  |
| 82  | Nishindaside | 10310589   | Helicase                            | -7.79          | 1.962                 | Lys <sup>139</sup> , Glu <sup>142</sup> , Glu <sup>143</sup> , Lys <sup>146</sup> , Asn <sup>179</sup> , Tyr <sup>180</sup> , Val <sup>181</sup> , Glu <sup>197</sup> , Thr <sup>214</sup> , His <sup>230</sup> , Ala <sup>336</sup> , Arg <sup>337</sup> , Arg <sup>339</sup> , Thr <sup>410</sup>                                                              |
|     |              |            | E-channel proteins                  | -7.73          | 2.15                  | Ile <sup>46</sup> , Ser <sup>50</sup> , Leu <sup>51</sup> , Pro <sup>54</sup> , Phe <sup>56</sup> , Tyr <sup>57</sup> , Ser <sup>60</sup> , Arg <sup>61</sup>                                                                                                                                                                                                    |
|     |              |            | Spike Open Protein                  | -6.57          | 15.33                 | Tyr <sup>38</sup> , Asp <sup>40</sup> , Lys <sup>41</sup> , Val <sup>42</sup> , Phe <sup>43</sup> , Arg <sup>44</sup> , Lys <sup>206</sup> , Glu <sup>224</sup> , Pro <sup>225</sup> , Tyr <sup>279</sup> , Gly <sup>283</sup> , Thr <sup>284</sup>                                                                                                              |
|     |              |            | Spike Close Protein                 | -7.38          | 3.9                   | Tyr <sup>38</sup> , Asp <sup>40</sup> , Lys <sup>41</sup> , Val <sup>42</sup> , Phe <sup>43</sup> , Arg <sup>44</sup> , Glu <sup>224</sup> , Pro <sup>225</sup> , Leu <sup>226</sup> , Val <sup>227</sup> , Asp <sup>228</sup> , Tyr <sup>279</sup> , Gly <sup>283</sup>                                                                                         |
| 83  | Nishindaside | 10310589   | Main Protease (MPro)                | -7.55          | 2.91                  | His <sup>41</sup> , Met <sup>49</sup> , Phe <sup>140</sup> , Leu <sup>141</sup> , Asn <sup>142</sup> , Ser <sup>144</sup> , Cys <sup>145</sup> , His <sup>163</sup> , His <sup>164</sup> , Met <sup>165</sup> , Glu <sup>166</sup> , Leu <sup>167</sup> , Pro <sup>168</sup> , Arg <sup>188</sup> , Gln <sup>189</sup> , Thr <sup>190</sup> , Gln <sup>192</sup> |
|     |              |            | Papain like protease (PLPro)        | -7.53          | 3.03                  | Asp <sup>108</sup> , Asn <sup>109</sup> , Gly <sup>160</sup> , Glu <sup>161</sup> , Leu <sup>162</sup> , Gln <sup>269</sup>                                                                                                                                                                                                                                      |
|     |              |            | RNA-dependent RNA polymerase (RdRP) | -6.75          | 11.28                 | Tyr <sup>129</sup> , His <sup>133</sup> , Phe <sup>134</sup> , Asp <sup>135</sup> , Asn <sup>138</sup> , Ser <sup>709</sup> , Thr <sup>710</sup> , Ala <sup>771</sup> , Ser <sup>772</sup> , Gln <sup>773</sup> , Gly <sup>774</sup> , Ser <sup>778</sup> , Lys <sup>780</sup> , Asn <sup>781</sup> , Ser <sup>784</sup>                                         |
|     |              |            | Helicase                            | -7.19          | 5.412                 | Gly <sup>3</sup> , Ala <sup>4</sup> , Cys <sup>5</sup> , Val <sup>6</sup> , Arg <sup>21</sup> , Arg <sup>22</sup> , Pro <sup>23</sup> , Phe <sup>24</sup> , Arg <sup>129</sup> , Leu <sup>130</sup> , Leu <sup>132</sup> , Phe <sup>133</sup> , Glu <sup>136</sup> , Pro <sup>234</sup> , Leu <sup>235</sup> , Ser <sup>236</sup>                                |
|     |              |            | E-channel proteins                  | -7.04          | 6.9                   | Leu <sup>31</sup> , Ala <sup>32</sup> , Thr <sup>35</sup> , Ala <sup>36</sup> , Arg <sup>38</sup> , Cys <sup>40</sup>                                                                                                                                                                                                                                            |
|     |              |            | Spike Open Protein                  | -5.94          | 43.95                 | Asp <sup>364</sup> , Tyr <sup>365</sup> , Ser <sup>366</sup> , Tyr <sup>369</sup> , Asn <sup>370</sup> , Pro <sup>384</sup> , Thr <sup>385</sup> , Leu <sup>387</sup> , Asn <sup>388</sup> , Pro <sup>527</sup> , Lys <sup>528</sup>                                                                                                                             |
|     |              |            | Spike Close Protein                 | -7.14          | 5.83                  | Glu <sup>96</sup> , Asn <sup>99</sup> , Ile <sup>101</sup> , Arg <sup>102</sup> , Gly <sup>103</sup> , Trp <sup>104</sup> , Ile <sup>119</sup> , Val <sup>120</sup> , Asn <sup>121</sup> , Val <sup>126</sup> , Ile <sup>128</sup> , Tyr <sup>170</sup> , Ser <sup>172</sup> , Arg <sup>190</sup> , Phe <sup>192</sup> , Val <sup>227</sup>                      |
|     |              |            | Main Protease (MPro)                | -7.43          | 3.57                  | His <sup>41</sup> , Met <sup>49</sup> , Phe <sup>140</sup> , Leu <sup>141</sup> , Asn <sup>142</sup> , Ser <sup>144</sup> , Cys <sup>145</sup> , His <sup>163</sup> , His <sup>164</sup> , Met <sup>165</sup> , Glu <sup>166</sup> , Leu <sup>167</sup> , Pro <sup>168</sup> , Arg <sup>188</sup> , Gln <sup>189</sup> , Thr <sup>190</sup> , Gln <sup>192</sup> |
|     |              |            | Papain like protease (PLPro)        | -7.2           | 5.24                  | Tyr <sup>268</sup> , Gln <sup>269</sup>                                                                                                                                                                                                                                                                                                                          |
|     |              |            | RNA-dependent RNA polymerase (RdRP) | -6.36          | 21.63                 | Tyr <sup>719</sup> , Val <sup>720</sup> , Leu <sup>723</sup> , Asn <sup>743</sup> , Glu <sup>744</sup> , Phe <sup>745</sup> , Ala <sup>747</sup> , Tyr <sup>748</sup> , Lys <sup>751</sup> , His <sup>752</sup>                                                                                                                                                  |

| Sr. | Ligands              | PubChem ID | Proteins                            | Binding energy | Dissociation Constant | Active site residues                                                                                                                                                                                                                                                                                                                                                                                  |
|-----|----------------------|------------|-------------------------------------|----------------|-----------------------|-------------------------------------------------------------------------------------------------------------------------------------------------------------------------------------------------------------------------------------------------------------------------------------------------------------------------------------------------------------------------------------------------------|
|     |                      |            |                                     | (kcal/mol)     | ( $\mu$ M)            |                                                                                                                                                                                                                                                                                                                                                                                                       |
| 84  | Nordihydroguaiaretic | 4534       | Helicase                            | -7.01          | 7.247                 | Gly <sup>3</sup> , Ala <sup>4</sup> , Val <sup>6</sup> , Arg <sup>21</sup> , Arg <sup>22</sup> , Pro <sup>23</sup> , Phe <sup>24</sup> , Arg <sup>129</sup> , Leu <sup>132</sup> , Phe <sup>133</sup> , Glu <sup>136</sup> , Pro <sup>234</sup> , Leu <sup>235</sup>                                                                                                                                  |
|     |                      |            | E-channel proteins                  | -6.57          | 15.23                 | Ile <sup>46</sup> , Leu <sup>51</sup> , Pro <sup>54</sup> , Tyr <sup>57</sup>                                                                                                                                                                                                                                                                                                                         |
|     |                      |            | Spike Open Protein                  | -6.13          | 32                    | Pro <sup>330</sup> , Ile <sup>332</sup> , Asn <sup>360</sup> , Pro <sup>521</sup> , Ala <sup>522</sup> , Thr <sup>523</sup> , Asn <sup>544</sup> , Gln <sup>564</sup> , Arg <sup>577</sup> , Asp <sup>578</sup> , Pro <sup>579</sup> , Gln <sup>580</sup> , Leu <sup>582</sup>                                                                                                                        |
|     |                      |            | Spike Close Protein                 | -6.25          | 26.27                 | Met <sup>740</sup> , Tyr <sup>741</sup> , Ile <sup>742</sup> , Cys <sup>743</sup> , Gly <sup>744</sup> , Asp <sup>745</sup> , Phe <sup>855</sup> , Asn <sup>856</sup> , Leu <sup>966</sup> , Ser <sup>975</sup> , Val <sup>976</sup> , Leu <sup>977</sup> , Asn <sup>978</sup> , Arg <sup>1000</sup>                                                                                                  |
| 85  | Oleic acid           | 445639     | Main Protease (MPro)                | -4.34          | 663.24                | Thr <sup>199</sup> , Tyr <sup>237</sup> , Tyr <sup>239</sup> , Leu <sup>271</sup> , Leu <sup>272</sup> , Gly <sup>275</sup> , Met <sup>276</sup> , Asn <sup>277</sup> , Gly <sup>278</sup> , Ala <sup>285</sup> , Leu <sup>286</sup> , Leu <sup>287</sup>                                                                                                                                             |
|     |                      |            | Papain like protease (PLPro)        | -6.33          | 22.8                  | Asp <sup>164</sup> , Pro <sup>247</sup> , Pro <sup>248</sup> , Tyr <sup>264</sup> , Asn <sup>267</sup> , Tyr <sup>268</sup> , Tyr <sup>273</sup> , Thr <sup>301</sup>                                                                                                                                                                                                                                 |
|     |                      |            | RNA-dependent RNA polymerase (RdRP) | -3.95          | 1268.08               | Tyr <sup>129</sup> , His <sup>133</sup> , Phe <sup>134</sup> , Asp <sup>135</sup> , Asn <sup>705</sup> , Ala <sup>706</sup> , Ser <sup>709</sup> , Thr <sup>710</sup> , Ala <sup>771</sup> , Gly <sup>774</sup> , Ser <sup>778</sup> , Lys <sup>780</sup> , Asn <sup>781</sup> , Ser <sup>784</sup>                                                                                                   |
|     |                      |            | Helicase                            | -4.49          | 515.764               | Ala <sup>4</sup> , Val <sup>6</sup> , Asn <sup>9</sup> , Arg <sup>21</sup> , Arg <sup>22</sup> , Pro <sup>23</sup> , Phe <sup>24</sup> , Arg <sup>129</sup> , Leu <sup>132</sup> , Phe <sup>133</sup> , Glu <sup>136</sup> , Pro <sup>234</sup> , Leu <sup>235</sup> , Ser <sup>236</sup>                                                                                                             |
|     |                      |            | E-channel proteins                  | -5.78          | 57.87                 | No binding site was found                                                                                                                                                                                                                                                                                                                                                                             |
|     |                      |            | Spike Open Protein                  | -3.26          | 4084.33               | Thr <sup>33</sup> , Phe <sup>58</sup> , Phe <sup>59</sup> , Gln <sup>218</sup> , Gly <sup>219</sup> , Phe <sup>220</sup> , Asp <sup>287</sup> , Ala <sup>288</sup> , Val <sup>289</sup> , Asp <sup>290</sup> , Leu <sup>293</sup> , Asp <sup>294</sup> , Leu <sup>296</sup> , Ser <sup>297</sup> , Lys <sup>300</sup> , Asn <sup>606</sup>                                                            |
|     |                      |            | Spike Close Protein                 | -5.06          | 194.76                | Trp <sup>104</sup> , Ile <sup>119</sup> , Asn <sup>121</sup> , Val <sup>126</sup> , Ile <sup>128</sup> , Arg <sup>190</sup> , Phe <sup>192</sup> , Phe <sup>194</sup> , Ile <sup>203</sup> , Ser <sup>205</sup> , Lys <sup>206</sup> , His <sup>207</sup> , Leu <sup>226</sup> , Val <sup>227</sup>                                                                                                   |
|     |                      |            | Main Protease (MPro)                | -7.8           | 1.92                  | Thr <sup>25</sup> , Thr <sup>26</sup> , Leu <sup>27</sup> , His <sup>41</sup> , Thr <sup>45</sup> , Ser <sup>46</sup> , Met <sup>49</sup> , Phe <sup>140</sup> , Leu <sup>141</sup> , Asn <sup>142</sup> , Gly <sup>143</sup> , Ser <sup>144</sup> , Cys <sup>145</sup> , His <sup>163</sup> , His <sup>164</sup> , Met <sup>165</sup> , Glu <sup>166</sup> , His <sup>172</sup> , Gln <sup>189</sup> |
|     |                      |            | Papain like protease (PLPro)        | -8.5           | 0.58                  | Asp <sup>164</sup> , Arg <sup>166</sup> , Met <sup>208</sup> , Ala <sup>246</sup> , Pro <sup>247</sup> , Pro <sup>248</sup> , Tyr <sup>264</sup> , Asn <sup>267</sup> , Tyr <sup>268</sup> , Tyr <sup>273</sup> , Thr <sup>301</sup>                                                                                                                                                                  |

| Sr. | Ligands     | PubChem ID | Proteins                            | Binding energy | Dissociation Constant | Active site residues                                                                                                                                                                                                                                                                                                                                                                                                           |
|-----|-------------|------------|-------------------------------------|----------------|-----------------------|--------------------------------------------------------------------------------------------------------------------------------------------------------------------------------------------------------------------------------------------------------------------------------------------------------------------------------------------------------------------------------------------------------------------------------|
|     |             |            |                                     | (kcal/mol)     | ( $\mu$ M)            |                                                                                                                                                                                                                                                                                                                                                                                                                                |
| 86  | Oleuropein  | 5281544    | RNA-dependent RNA polymerase (RdRP) | -8.31          | 0.81                  | Tyr <sup>32</sup> , Lys <sup>47</sup> , Phe <sup>48</sup> , Tyr <sup>129</sup> , Ala <sup>130</sup> , His <sup>133</sup> , Phe <sup>134</sup> , Asp <sup>135</sup> , Asn <sup>138</sup> , Cys <sup>139</sup> , Asp <sup>140</sup> , Thr <sup>141</sup> , Leu <sup>142</sup> , Thr <sup>710</sup> , Asp <sup>711</sup> , Lys <sup>714</sup> , Ser <sup>778</sup> , Lys <sup>780</sup> , Asn <sup>781</sup> , Ser <sup>784</sup> |
|     |             |            | Helicase                            | -7.77          | 2.003                 | Ala <sup>4</sup> , Val <sup>6</sup> , Arg <sup>15</sup> , Arg <sup>21</sup> , Arg <sup>22</sup> , Pro <sup>23</sup> , Phe <sup>24</sup> , Arg <sup>129</sup> , Leu <sup>132</sup> , Phe <sup>133</sup> , Glu <sup>136</sup> , Pro <sup>234</sup> , Leu <sup>235</sup> , Ser <sup>236</sup>                                                                                                                                     |
|     |             |            | E-channel proteins                  | -8.3           | 0.82                  | Arg <sup>61</sup> , Asn <sup>64</sup> , Leu <sup>65</sup>                                                                                                                                                                                                                                                                                                                                                                      |
|     |             |            | Spike Open Protein                  | -6.8           | 10.42                 | Pro <sup>330</sup> , Asn <sup>331</sup> , Ile <sup>332</sup> , Thr <sup>333</sup> , Asn <sup>334</sup> , Asn <sup>360</sup> , His <sup>519</sup> , Pro <sup>521</sup> , Ala <sup>522</sup> , Thr <sup>523</sup> , Asn <sup>544</sup> , Gln <sup>564</sup> , Arg <sup>577</sup> , Asp <sup>578</sup> , Pro <sup>579</sup> , Leu <sup>582</sup>                                                                                  |
|     |             |            | Spike Close Protein                 | -7.12          | 6.05                  | Arg <sup>355</sup> , Asn <sup>394</sup> , Tyr <sup>396</sup> , Pro <sup>426</sup> , Asp <sup>427</sup> , Asp <sup>428</sup> , Phe <sup>429</sup> , Thr <sup>430</sup> , Pro <sup>463</sup> , Phe <sup>464</sup> , Ser <sup>514</sup> , Phe <sup>515</sup> , Glu <sup>516</sup> , Leu <sup>518</sup>                                                                                                                            |
| 87  | Oxalic acid | 971        | Main Protease (MPro)                | -4.55          | 461.39                | Met <sup>6</sup> , Phe <sup>8</sup> , Gln <sup>127</sup> , Asp <sup>295</sup> , Arg <sup>298</sup> , Gln <sup>299</sup>                                                                                                                                                                                                                                                                                                        |
|     |             |            | Papain like protease (PLPro)        | -5.14          | 171.03                | No binding site was found                                                                                                                                                                                                                                                                                                                                                                                                      |
|     |             |            | RNA-dependent RNA polymerase (RdRP) | -4.89          | 259.93                | Phe <sup>440</sup> , Phe <sup>441</sup> , Phe <sup>442</sup> , Gln <sup>444</sup> , Lys <sup>545</sup> , Tyr <sup>546</sup> , Ala <sup>547</sup> , Ser <sup>549</sup> , Lys <sup>551</sup> , Asn <sup>552</sup> , Arg <sup>553</sup> , Ala <sup>554</sup> , Arg <sup>555</sup>                                                                                                                                                 |
|     |             |            | Helicase                            | -4.98          | 222.918               | Tyr <sup>120</sup> , Ala <sup>123</sup> , Asn <sup>124</sup> , Leu <sup>138</sup> , Asn <sup>381</sup> , Arg <sup>409</sup> , Leu <sup>417</sup> , Tyr <sup>421</sup> , Phe <sup>422</sup> , Asn <sup>423</sup>                                                                                                                                                                                                                |
|     |             |            | E-channel proteins                  | -3.24          | 4189.06               | No binding site was found                                                                                                                                                                                                                                                                                                                                                                                                      |
|     |             |            | Spike Open Protein                  | -3.69          | 1983.32               | Gln <sup>784</sup> , Val <sup>785</sup> , Lys <sup>786</sup> , Gln <sup>787</sup> , Tyr <sup>789</sup> , Phe <sup>888</sup> , Gly <sup>891</sup> , Ala <sup>892</sup> , Ala <sup>893</sup>                                                                                                                                                                                                                                     |
|     |             |            | Spike Close Protein                 | -4.5           | 506.28                | Asp <sup>420</sup> , Tyr <sup>421</sup> , Asn <sup>422</sup> , Tyr <sup>423</sup> , Lys <sup>424</sup> , Lys <sup>462</sup> , Glu <sup>465</sup> , Arg <sup>466</sup> , Asp <sup>467</sup>                                                                                                                                                                                                                                     |
|     |             |            | Main Protease (MPro)                | -4.57          | 450.62                | Phe <sup>8</sup> , Val <sup>104</sup> , Ile <sup>106</sup> , Gln <sup>110</sup> , Thr <sup>111</sup> , Asn <sup>151</sup> , Ile <sup>152</sup> , Asp <sup>153</sup> , Ser <sup>158</sup> , Thr <sup>292</sup> , Phe <sup>294</sup> , Asp <sup>295</sup> , Arg <sup>298</sup>                                                                                                                                                   |
|     |             |            | Papain like protease (PLPro)        | -5.58          | 80.7                  | Cys <sup>155</sup> , Asn <sup>156</sup> , Lys <sup>157</sup> , Thr <sup>158</sup> , Val <sup>159</sup> , Glu <sup>161</sup> , Glu <sup>167</sup> , Tyr <sup>171</sup>                                                                                                                                                                                                                                                          |
|     |             |            | RNA-dependent RNA polymerase (RdRP) | -4.35          | 649.94                | Phe <sup>441</sup> , Ala <sup>547</sup> , Ile <sup>548</sup> , Arg <sup>836</sup> , Ile <sup>837</sup> , Ala <sup>840</sup> , Gly <sup>841</sup> , Phe <sup>843</sup> , Val <sup>844</sup> , Asp <sup>845</sup> , Arg <sup>858</sup> , Ser <sup>861</sup> , Leu <sup>862</sup>                                                                                                                                                 |

| Sr. | Ligands          | PubChem ID | Proteins                            | Binding energy | Dissociation Constant | Active site residues                                                                                                                                                                                                                                                                                                                                                                                      |
|-----|------------------|------------|-------------------------------------|----------------|-----------------------|-----------------------------------------------------------------------------------------------------------------------------------------------------------------------------------------------------------------------------------------------------------------------------------------------------------------------------------------------------------------------------------------------------------|
|     |                  |            |                                     | (kcal/mol)     | ( $\mu$ M)            |                                                                                                                                                                                                                                                                                                                                                                                                           |
| 88  | Palmitoleic acid | 445638     | Helicase                            | -4.75          | 330.322               | Ala <sup>4</sup> , Cys <sup>5</sup> , Val <sup>6</sup> , Arg <sup>21</sup> , Pro <sup>23</sup> , Phe <sup>24</sup> , Arg <sup>129</sup> , Leu <sup>130</sup> , Leu <sup>132</sup> , Phe <sup>133</sup> , Glu <sup>136</sup> , Pro <sup>234</sup> , Leu <sup>235</sup> , Ser <sup>236</sup>                                                                                                                |
|     |                  |            | E-channel proteins                  | -5.88          | 48.97                 | No binding site was found                                                                                                                                                                                                                                                                                                                                                                                 |
|     |                  |            | Spike Open Protein                  | -4.21          | 814.89                | Tyr <sup>707</sup> , Ser <sup>708</sup> , Asn <sup>709</sup> , Asn <sup>710</sup> , Ser <sup>711</sup> , Ile <sup>712</sup> , Thr <sup>1077</sup> , Ala <sup>1078</sup> , Pro <sup>1079</sup> , Phe <sup>1089</sup> , Pro <sup>1090</sup> , Gly <sup>1093</sup> , Val <sup>1094</sup> , Phe <sup>1095</sup> , Arg <sup>1107</sup> , Phe <sup>1121</sup>                                                   |
|     |                  |            | Spike Close Protein                 | -4.55          | 462.96                | Ile <sup>105</sup> , Leu <sup>118</sup> , Val <sup>120</sup> , Asn <sup>122</sup> , Val <sup>127</sup> , Lys <sup>129</sup> , Phe <sup>133</sup> , Phe <sup>135</sup> , Cys <sup>136</sup> , Pro <sup>139</sup> , Phe <sup>140</sup> , Leu <sup>141</sup> , Leu <sup>241</sup>                                                                                                                            |
| 89  | p-Cymene         | 7463       | Main Protease (MPro)                | -5.62          | 76.07                 | Met <sup>6</sup> , Ala <sup>7</sup> , Phe <sup>8</sup> , Pro <sup>9</sup> , Gln <sup>127</sup> , Phe <sup>291</sup> , Asp <sup>295</sup> , Arg <sup>298</sup> , Gln <sup>299</sup> , Val <sup>303</sup> , Thr <sup>304</sup>                                                                                                                                                                              |
|     |                  |            | Papain like protease (PLPro)        | -6.67          | 12.95                 | Leu <sup>162</sup> , Gly <sup>163</sup> , Asp <sup>164</sup> , Pro <sup>247</sup> , Pro <sup>248</sup> , Tyr <sup>264</sup> , Tyr <sup>268</sup> , Tyr <sup>273</sup> , Thr <sup>301</sup>                                                                                                                                                                                                                |
|     |                  |            | RNA-dependent RNA polymerase (RdRP) | -5.5           | 93.78                 | Pro <sup>323</sup> , Phe <sup>326</sup> , Gly <sup>327</sup> , Pro <sup>328</sup> , Tyr <sup>346</sup> , His <sup>347</sup> , Phe <sup>348</sup> , Arg <sup>349</sup> , Phe <sup>396</sup> , Val <sup>398</sup> , Ser <sup>664</sup> , Glu <sup>665</sup> , Met <sup>666</sup> , Val <sup>675</sup> , Lys <sup>676</sup> , Pro <sup>677</sup> , basn <sup>118</sup>                                       |
|     |                  |            | Helicase                            | -5.83          | 53.64                 | Trp <sup>114</sup> , Tyr <sup>120</sup> , Ala <sup>123</sup> , Asn <sup>124</sup> , Ala <sup>134</sup> , Ala <sup>135</sup> , Leu <sup>138</sup> , Lys <sup>139</sup> , Thr <sup>380</sup> , Asn <sup>381</sup> , Tyr <sup>382</sup> , Arg <sup>409</sup> , Leu <sup>417</sup> , Tyr <sup>421</sup> , Phe <sup>422</sup> , Asn <sup>423</sup>                                                             |
|     |                  |            | E-channel proteins                  | -6.27          | 25.44                 | No binding site was found                                                                                                                                                                                                                                                                                                                                                                                 |
|     |                  |            | Spike Open Protein                  | -5.75          | 61.5                  | Ser <sup>884</sup> , Gly <sup>885</sup> , Trp <sup>886</sup> , Thr <sup>887</sup> , Ile <sup>896</sup> , Met <sup>900</sup> , Gln <sup>901</sup> , Tyr <sup>904</sup> , Arg <sup>905</sup> , Met <sup>1050</sup>                                                                                                                                                                                          |
|     |                  |            | Spike Close Protein                 | -5.68          | 68.4                  | Tyr <sup>38</sup> , Asp <sup>40</sup> , Lys <sup>41</sup> , Val <sup>42</sup> , Phe <sup>43</sup> , Arg <sup>44</sup> , Glu <sup>224</sup> , Pro <sup>225</sup> , Tyr <sup>279</sup> , Gly <sup>283</sup> , Thr <sup>284</sup>                                                                                                                                                                            |
|     |                  |            | Main Protease (MPro)                | -8.25          | 0.9                   | Thr <sup>25</sup> , His <sup>41</sup> , Met <sup>49</sup> , Phe <sup>140</sup> , Leu <sup>141</sup> , Asn <sup>142</sup> , Gly <sup>143</sup> , Ser <sup>144</sup> , Cys <sup>145</sup> , His <sup>163</sup> , His <sup>164</sup> , Met <sup>165</sup> , Glu <sup>166</sup> , Leu <sup>167</sup> , Pro <sup>168</sup> , Arg <sup>188</sup> , Gln <sup>189</sup> , Thr <sup>190</sup> , Gln <sup>192</sup> |
|     |                  |            | Papain like protease (PLPro)        | -8.86          | 0.32                  | Arg <sup>166</sup> , Ser <sup>170</sup> , Val <sup>202</sup> , Glu <sup>203</sup> , Met <sup>206</sup> , Tyr <sup>207</sup> , Met <sup>208</sup>                                                                                                                                                                                                                                                          |

| Sr. | Ligands              | PubChem ID | Proteins                            | Binding energy | Dissociation Constant | Active site residues                                                                                                                                                                                                                                                                                                                                                                                                                                                        |
|-----|----------------------|------------|-------------------------------------|----------------|-----------------------|-----------------------------------------------------------------------------------------------------------------------------------------------------------------------------------------------------------------------------------------------------------------------------------------------------------------------------------------------------------------------------------------------------------------------------------------------------------------------------|
|     |                      |            |                                     | (kcal/mol)     | ( $\mu$ M)            |                                                                                                                                                                                                                                                                                                                                                                                                                                                                             |
| 90  | Phloridzin dihydrate | 9912668    | RNA-dependent RNA polymerase (RdRP) | -7.25          | 4.87                  | Glu <sup>474</sup> , Asp <sup>477</sup> , Lys <sup>478</sup> , Phe <sup>480</sup> , Asp <sup>481</sup> , Tyr <sup>483</sup> , Asp <sup>484</sup> , Gly <sup>485</sup> , Arg <sup>640</sup> , Lys <sup>641</sup> , Thr <sup>643</sup> , Thr <sup>644</sup> , Thr <sup>739</sup> , Val <sup>742</sup>                                                                                                                                                                         |
|     |                      |            | Helicase                            | -7.68          | 2.363                 | Lys <sup>139</sup> , Glu <sup>142</sup> , Glu <sup>143</sup> , Lys <sup>146</sup> , Asn <sup>179</sup> , Tyr <sup>180</sup> , Val <sup>181</sup> , Leu <sup>227</sup> , Thr <sup>228</sup> , His <sup>230</sup> , Cys <sup>309</sup> , Ser <sup>310</sup> , Met <sup>378</sup> , Ala <sup>379</sup> , Thr <sup>380</sup> , Tyr <sup>382</sup> , Asp <sup>383</sup> , Ala <sup>407</sup> , Pro <sup>408</sup> , Arg <sup>409</sup> , Thr <sup>410</sup> , Leu <sup>411</sup> |
|     |                      |            | E-channel proteins                  | -7.34          | 4.2                   | Arg <sup>61</sup> , Asn <sup>64</sup>                                                                                                                                                                                                                                                                                                                                                                                                                                       |
|     |                      |            | Spike Open Protein                  | -6.16          | 30.32                 | Met <sup>740</sup> , Tyr <sup>741</sup> , Ile <sup>742</sup> , Cys <sup>743</sup> , Gly <sup>744</sup> , Asn <sup>856</sup> , Leu <sup>966</sup> , Ser <sup>967</sup> , Ser <sup>975</sup> , Val <sup>976</sup> , Leu <sup>977</sup> , Asn <sup>978</sup> , Arg <sup>1000</sup>                                                                                                                                                                                             |
|     |                      |            | Spike Close Protein                 | -7.14          | 5.84                  | Glu <sup>96</sup> , Asn <sup>99</sup> , Ile <sup>101</sup> , Arg <sup>102</sup> , Gly <sup>103</sup> , Trp <sup>104</sup> , Ile <sup>119</sup> , Asn <sup>121</sup> , Val <sup>126</sup> , Ile <sup>128</sup> , Arg <sup>190</sup> , Phe <sup>192</sup> , Ile <sup>203</sup> , Ser <sup>205</sup> , His <sup>207</sup> , Leu <sup>226</sup> , Val <sup>227</sup>                                                                                                            |
| 91  | Phlorizin            | 6072       | Main Protease (MPro)                | -8.75          | 0.39                  | Thr <sup>24</sup> , Thr <sup>25</sup> , Thr <sup>26</sup> , Leu <sup>27</sup> , His <sup>41</sup> , Cys <sup>44</sup> , Thr <sup>45</sup> , Ser <sup>46</sup> , Met <sup>49</sup> , Asn <sup>142</sup> , Gly <sup>143</sup> , Cys <sup>145</sup> , His <sup>164</sup> , Met <sup>165</sup> , Glu <sup>166</sup> , Leu <sup>167</sup> , Pro <sup>168</sup> , Arg <sup>188</sup> , Gln <sup>189</sup> , Thr <sup>190</sup> , Gln <sup>192</sup>                               |
|     |                      |            | Papain like protease (PLPro)        | -9.01          | 0.25                  | Arg <sup>65</sup> , Val <sup>66</sup> , Phe <sup>69</sup> , Glu <sup>70</sup> , Thr <sup>75</sup>                                                                                                                                                                                                                                                                                                                                                                           |
|     |                      |            | RNA-dependent RNA polymerase (RdRP) | -7.91          | 1.58                  | Ser <sup>255</sup> , Tyr <sup>265</sup> , Ser <sup>318</sup> , Thr <sup>319</sup> , Val <sup>320</sup> , Phe <sup>321</sup> , Pro <sup>322</sup> , Pro <sup>323</sup> , Arg <sup>349</sup> , Cys <sup>395</sup> , Phe <sup>396</sup> , Tyr <sup>456</sup> , Arg <sup>457</sup> , Tyr <sup>458</sup> , Asn <sup>459</sup> , Leu <sup>460</sup> , Pro <sup>461</sup> , Pro <sup>677</sup>                                                                                     |
|     |                      |            | Helicase                            | -8.66          | 0.447                 | Asn <sup>177</sup> , Asn <sup>179</sup> , Glu <sup>201</sup> , Lys <sup>202</sup> , Gly <sup>203</sup> , Asp <sup>204</sup> , Pro <sup>514</sup> , Tyr <sup>515</sup> , Asn <sup>516</sup> , Asn <sup>519</sup> , Ala <sup>520</sup> , Thr <sup>530</sup> , Gln <sup>531</sup> , Thr <sup>532</sup> , Val <sup>533</sup> , Asp <sup>534</sup> , His <sup>554</sup> , Arg <sup>560</sup>                                                                                     |
|     |                      |            | E-channel proteins                  | -8.66          | 0.31                  | No binding site was found                                                                                                                                                                                                                                                                                                                                                                                                                                                   |
|     |                      |            | Spike Open Protein                  | -7.2           | 5.27                  | Ala <sup>520</sup> , Pro <sup>521</sup> , Lys <sup>557</sup> , Leu <sup>560</sup> , Phe <sup>562</sup> , Gln <sup>563</sup> , Gln <sup>564</sup> , Phe <sup>565</sup> , Gly <sup>566</sup> , Arg <sup>567</sup> , Asp <sup>568</sup> , Ile <sup>569</sup> , Asp <sup>571</sup>                                                                                                                                                                                              |
|     |                      |            | Spike Close Protein                 | -7.56          | 2.89                  | Phe <sup>342</sup> , Asn <sup>343</sup> , Phe <sup>347</sup> , Leu <sup>368</sup> , Ser <sup>371</sup> , Ser <sup>373</sup> , Phe <sup>374</sup> , Ser <sup>375</sup> , Trp <sup>436</sup> , Asn <sup>437</sup> , Ser <sup>438</sup> , Asn <sup>440</sup> , Leu <sup>441</sup> , Arg <sup>509</sup>                                                                                                                                                                         |
|     |                      |            | Main Protease (MPro)                | -5.91          | 46.94                 | Met <sup>6</sup> , Ala <sup>7</sup> , Phe <sup>8</sup> , Gln <sup>127</sup> , Phe <sup>291</sup> , Asp <sup>295</sup> , Arg <sup>298</sup> , Gln <sup>299</sup>                                                                                                                                                                                                                                                                                                             |

| Sr. | Ligands    | PubChem ID | Proteins                            | Binding energy | Dissociation Constant | Active site residues                                                                                                                                                                                                                                                                                                                                                                  |
|-----|------------|------------|-------------------------------------|----------------|-----------------------|---------------------------------------------------------------------------------------------------------------------------------------------------------------------------------------------------------------------------------------------------------------------------------------------------------------------------------------------------------------------------------------|
|     |            |            |                                     | (kcal/mol)     | ( $\mu$ M)            |                                                                                                                                                                                                                                                                                                                                                                                       |
| 92  | Pyrogallol | 1057       | Papain like protease (PLPro)        | -5.7           | 65.9                  | Thr <sup>74</sup> , Asp <sup>76</sup> , Phe <sup>79</sup> , Arg <sup>82</sup> , Ala <sup>153</sup> , Tyr <sup>154</sup> , Cys <sup>155</sup> , Asn <sup>156</sup> , His <sup>175</sup>                                                                                                                                                                                                |
|     |            |            | RNA-dependent RNA polymerase (RdRP) | -5.69          | 67.59                 | Lys <sup>593</sup> , Phe <sup>594</sup> , Gln <sup>815</sup> , Pro <sup>830</sup> , Tyr <sup>831</sup> , Pro <sup>832</sup> , Asp <sup>865</sup> , Pro <sup>868</sup> , Trp <sup>916</sup>                                                                                                                                                                                            |
|     |            |            | Helicase                            | -6.06          | 36.016                | Tyr <sup>120</sup> , Ala <sup>123</sup> , Asn <sup>124</sup> , Lys <sup>131</sup> , Ala <sup>134</sup> , Ala <sup>135</sup> , Leu <sup>138</sup> , Thr <sup>380</sup> , Asn <sup>381</sup> , Tyr <sup>382</sup> , Arg <sup>409</sup> , Tyr <sup>421</sup> , Phe <sup>422</sup> , Asn <sup>423</sup>                                                                                   |
|     |            |            | E-channel proteins                  | -4.61          | 418.37                | Ser <sup>16</sup> , Leu <sup>19</sup> , Phe <sup>20</sup> , Phe <sup>23</sup> , eleu <sup>21</sup> , eval <sup>24</sup> , eval <sup>25</sup> , eleu <sup>28</sup>                                                                                                                                                                                                                     |
|     |            |            | Spike Open Protein                  | -4.94          | 240.51                | Ala <sup>958</sup> , Thr <sup>961</sup> , Leu <sup>962</sup> , Gln <sup>965</sup> , Ser <sup>1003</sup> , Thr <sup>1006</sup> , Tyr <sup>1007</sup> , Gln <sup>1010</sup>                                                                                                                                                                                                             |
|     |            |            | Spike Close Protein                 | -5.75          | 61.5                  | Tyr <sup>38</sup> , Asp <sup>40</sup> , Lys <sup>41</sup> , Val <sup>42</sup> , Phe <sup>43</sup> , Arg <sup>44</sup> , Glu <sup>224</sup> , Pro <sup>225</sup> , Tyr <sup>279</sup> , Gly <sup>283</sup>                                                                                                                                                                             |
| 93  | Quercetin  | 5280343    | Main Protease (MPro)                | -7.49          | 3.25                  | His <sup>41</sup> , Met <sup>49</sup> , Phe <sup>140</sup> , Leu <sup>141</sup> , Asn <sup>142</sup> , Gly <sup>143</sup> , Ser <sup>144</sup> , Cys <sup>145</sup> , His <sup>163</sup> , Met <sup>165</sup> , Glu <sup>166</sup> , Leu <sup>167</sup> , Pro <sup>168</sup> , His <sup>172</sup> , Arg <sup>188</sup> , Gln <sup>189</sup> , Thr <sup>190</sup> , Gln <sup>192</sup> |
|     |            |            | Papain like protease (PLPro)        | -8.54          | 0.55                  | Arg <sup>166</sup> , Ser <sup>170</sup> , Val <sup>202</sup> , Glu <sup>203</sup> , Met <sup>206</sup> , Tyr <sup>207</sup> , Met <sup>208</sup> , Lys <sup>232</sup>                                                                                                                                                                                                                 |
|     |            |            | RNA-dependent RNA polymerase (RdRP) | -7.52          | 3.06                  | Thr <sup>591</sup> , Ser <sup>592</sup> , Lys <sup>593</sup> , Phe <sup>594</sup> , Gln <sup>815</sup> , Pro <sup>830</sup> , Tyr <sup>831</sup> , Pro <sup>832</sup> , Asp <sup>865</sup> , Pro <sup>868</sup> , Trp <sup>916</sup>                                                                                                                                                  |
|     |            |            | Helicase                            | -7.56          | 2.888                 | Asn <sup>177</sup> , Arg <sup>178</sup> , Glu <sup>201</sup> , Asn <sup>516</sup> , Ser <sup>517</sup> , Asn <sup>519</sup> , Ala <sup>520</sup> , Thr <sup>530</sup> , Thr <sup>532</sup> , Asp <sup>534</sup>                                                                                                                                                                       |
|     |            |            | E-channel proteins                  | -7.03          | 7.07                  | Leu <sup>27</sup> , Leu <sup>28</sup> , Val <sup>29</sup> , Leu <sup>31</sup> , Ala <sup>32</sup> , Thr <sup>35</sup> , Ala <sup>36</sup> , Arg <sup>38</sup>                                                                                                                                                                                                                         |
|     |            |            | Spike Open Protein                  | -7.14          | 5.8                   | Tyr <sup>38</sup> , Asp <sup>40</sup> , Lys <sup>41</sup> , Val <sup>42</sup> , Phe <sup>43</sup> , Arg <sup>44</sup> , Glu <sup>224</sup> , Pro <sup>225</sup> , Leu <sup>226</sup> , Tyr <sup>279</sup> , Gly <sup>283</sup>                                                                                                                                                        |
|     |            |            | Spike Close Protein                 | -7.43          | 3.57                  | Leu <sup>335</sup> , Cys <sup>336</sup> , Phe <sup>338</sup> , Gly <sup>339</sup> , Phe <sup>342</sup> , Asn <sup>343</sup> , Ala <sup>363</sup> , Asp <sup>364</sup> , Tyr <sup>365</sup> , Val <sup>367</sup> , Leu <sup>368</sup> , Ser <sup>371</sup> , Ser <sup>373</sup> , Phe <sup>374</sup>                                                                                   |
|     |            |            | Main Protease (MPro)                | -5.44          | 102.21                | Trp <sup>218</sup> , Phe <sup>219</sup> , Leu <sup>220</sup> , Asn <sup>221</sup> , Phe <sup>223</sup> , Ser <sup>267</sup> , Glu <sup>270</sup> , Leu <sup>271</sup> , Asn <sup>274</sup> , Gly <sup>275</sup>                                                                                                                                                                       |
|     |            |            | Papain like protease (PLPro)        | -6.75          | 11.31                 | No binding site was found                                                                                                                                                                                                                                                                                                                                                             |



| Sr. | Ligands     | PubChem ID | Proteins                            | Binding energy | Dissociation Constant | Active site residues                                                                                                                                                                                                                                                                                                                                                                                                                                                                                                                       |
|-----|-------------|------------|-------------------------------------|----------------|-----------------------|--------------------------------------------------------------------------------------------------------------------------------------------------------------------------------------------------------------------------------------------------------------------------------------------------------------------------------------------------------------------------------------------------------------------------------------------------------------------------------------------------------------------------------------------|
|     |             |            |                                     | (kcal/mol)     | ( $\mu$ M)            |                                                                                                                                                                                                                                                                                                                                                                                                                                                                                                                                            |
| 94  | Quinic acid | 6508       | RNA-dependent RNA polymerase (RdRP) | -6.15          | 30.84                 | Asp <sup>452</sup> , Tyr <sup>456</sup> , Arg <sup>555</sup> , Thr <sup>556</sup> , Val <sup>557</sup> , Ala <sup>558</sup> , Asp <sup>623</sup> , Arg <sup>624</sup> , Lys <sup>676</sup> , Thr <sup>680</sup> , Ser <sup>681</sup> , Ser <sup>682</sup>                                                                                                                                                                                                                                                                                  |
|     |             |            | Helicase                            | -5.93          | 44.701                | Pro <sup>406</sup> , Leu <sup>412</sup> , Thr <sup>416</sup> , Leu <sup>417</sup> , Glu <sup>418</sup> , Pro <sup>419</sup> , Phe <sup>422</sup> , Asn <sup>557</sup> , Asn <sup>559</sup> , Arg <sup>560</sup>                                                                                                                                                                                                                                                                                                                            |
|     |             |            | E-channel proteins                  | -5             | 216.25                | Leu <sup>51</sup> , Pro <sup>54</sup> , Tyr <sup>57</sup>                                                                                                                                                                                                                                                                                                                                                                                                                                                                                  |
|     |             |            | Spike Open Protein                  | -5.16          | 166.47                | Tyr <sup>396</sup> , Pro <sup>426</sup> , Asp <sup>428</sup> , Phe <sup>429</sup> , Thr <sup>430</sup> , Phe <sup>464</sup> , Ser <sup>514</sup> , Phe <sup>515</sup> , Glu <sup>516</sup> , Leu <sup>517</sup>                                                                                                                                                                                                                                                                                                                            |
|     |             |            | Spike Close Protein                 | -5.77          | 58.86                 | Met <sup>740</sup> , Tyr <sup>741</sup> , Ile <sup>742</sup> , Cys <sup>743</sup> , Gly <sup>744</sup> , Asn <sup>856</sup> , Leu <sup>966</sup> , Ser <sup>975</sup> , Val <sup>976</sup> , Leu <sup>977</sup> , Asn <sup>978</sup> , Arg <sup>1000</sup>                                                                                                                                                                                                                                                                                 |
| 95  | Reserpine   | 5770       | Main Protease (MPro)                | -7.64          | 2.5                   | Thr <sup>24</sup> , Thr <sup>25</sup> , Thr <sup>26</sup> , Leu <sup>27</sup> , His <sup>41</sup> , Cys <sup>44</sup> , Thr <sup>45</sup> , Ser <sup>46</sup> , Met <sup>49</sup> , Phe <sup>140</sup> , Leu <sup>141</sup> , Asn <sup>142</sup> , Gly <sup>143</sup> , Ser <sup>144</sup> , Cys <sup>145</sup> , His <sup>163</sup> , Met <sup>165</sup> , Glu <sup>166</sup> , Gln <sup>189</sup>                                                                                                                                        |
|     |             |            | Papain like protease (PLPro)        | -8.54          | 0.55                  | Arg <sup>166</sup> , Ser <sup>170</sup> , Leu <sup>185</sup> , Val <sup>187</sup> , Cys <sup>192</sup> , Gln <sup>195</sup> , Thr <sup>197</sup> , Leu <sup>199</sup> , Val <sup>202</sup> , Glu <sup>203</sup> , Met <sup>206</sup> , Tyr <sup>207</sup> , Met <sup>208</sup> , Gly <sup>209</sup> , Ile <sup>222</sup> , Thr <sup>225</sup> , Lys <sup>232</sup> zn <sup>500</sup>                                                                                                                                                       |
|     |             |            | RNA-dependent RNA polymerase (RdRP) | -8             | 1.36                  | Val <sup>335</sup> , Asp <sup>336</sup> , Val <sup>338</sup> , Phe <sup>340</sup> , Arg <sup>365</sup> , Leu <sup>366</sup> , Ser <sup>367</sup> , Phe <sup>368</sup> , Leu <sup>371</sup>                                                                                                                                                                                                                                                                                                                                                 |
|     |             |            | Helicase                            | -8.63          | 0.47                  | Phe <sup>145</sup> , Tyr <sup>149</sup> , Arg <sup>173</sup> , Pro <sup>174</sup> , Pro <sup>175</sup> , Asn <sup>177</sup> , Asn <sup>179</sup> , Tyr <sup>180</sup> , Gln <sup>404</sup> , Leu <sup>405</sup> , Pro <sup>406</sup> , Pro <sup>408</sup> , Arg <sup>409</sup> , Thr <sup>410</sup> , Leu <sup>412</sup> , Thr <sup>413</sup> , Gly <sup>415</sup> , Thr <sup>416</sup> , Leu <sup>417</sup> , Phe <sup>422</sup> , Ser <sup>485</sup> , His <sup>554</sup> , Asn <sup>557</sup> , Asn <sup>559</sup> , Arg <sup>560</sup> |
|     |             |            | E-channel proteins                  | -8.93          | 0.29                  | No binding site was found                                                                                                                                                                                                                                                                                                                                                                                                                                                                                                                  |
|     |             |            | Spike Open Protein                  | -7.4           | 3.75                  | Ile <sup>788</sup> , Lys <sup>790</sup> , Thr <sup>791</sup> , Pro <sup>793</sup> , Lys <sup>795</sup> , Ser <sup>803</sup> , Leu <sup>806</sup> , Pro <sup>807</sup> , Asp <sup>808</sup> , Pro <sup>809</sup> , Lys <sup>814</sup> , Gln <sup>872</sup> , Ser <sup>875</sup>                                                                                                                                                                                                                                                             |

| Sr. | Ligands     | PubChem ID | Proteins                            | Binding energy | Dissociation Constant | Active site residues                                                                                                                                                                                                                                                                                                                                                                                                            |
|-----|-------------|------------|-------------------------------------|----------------|-----------------------|---------------------------------------------------------------------------------------------------------------------------------------------------------------------------------------------------------------------------------------------------------------------------------------------------------------------------------------------------------------------------------------------------------------------------------|
|     |             |            |                                     | (kcal/mol)     | ( $\mu$ M)            |                                                                                                                                                                                                                                                                                                                                                                                                                                 |
|     |             |            | Spike Close Protein                 | -8.13          | 1.11                  | Glu <sup>96</sup> , Asn <sup>99</sup> , Ile <sup>101</sup> , Trp <sup>104</sup> , Ile <sup>119</sup> , Asn <sup>121</sup> , Val <sup>126</sup> , Ile <sup>128</sup> , Phe <sup>168</sup> , Tyr <sup>170</sup> , Ser <sup>172</sup> , Arg <sup>190</sup> , Phe <sup>192</sup> , Phe <sup>194</sup> , Ile <sup>203</sup> , Leu <sup>226</sup> , Val <sup>227</sup> , Asp <sup>228</sup> , Leu <sup>229</sup> , Pro <sup>230</sup> |
| 96  | Resveratrol | 445154     | Main Protease (MPro)                | -7.61          | 2.65                  | Met <sup>6</sup> , Ala <sup>7</sup> , Phe <sup>8</sup> , Pro <sup>9</sup> , Thr <sup>111</sup> , Gln <sup>127</sup> , Phe <sup>291</sup> , Asp <sup>295</sup> , Arg <sup>298</sup> , Gln <sup>299</sup> , Val <sup>303</sup> , Thr <sup>304</sup>                                                                                                                                                                               |
|     |             |            | Papain like protease (PLPro)        | -8.21          | 0.95                  | Phe <sup>69</sup> , His <sup>73</sup> , Thr <sup>74</sup> , Asp <sup>76</sup> , Phe <sup>79</sup> , Arg <sup>82</sup> , Ala <sup>153</sup> , Tyr <sup>154</sup> , Asn <sup>156</sup> , Gln <sup>174</sup> , His <sup>175</sup>                                                                                                                                                                                                  |
|     |             |            | RNA-dependent RNA polymerase (RdRP) | -6.92          | 8.52                  | Lys <sup>411</sup> , Pro <sup>412</sup> , Gly <sup>413</sup> , Asn <sup>414</sup> , Tyr <sup>546</sup> , Asp <sup>845</sup> , Asp <sup>846</sup> , Ile <sup>847</sup>                                                                                                                                                                                                                                                           |
|     |             |            | Helicase                            | -6.88          | 9.04                  | Lys <sup>473</sup> , Phe <sup>475</sup> , Arg <sup>579</sup> , Tyr <sup>582</sup> , Asp <sup>583</sup> , Leu <sup>585</sup> , Gln <sup>586</sup> , Phe <sup>587</sup> , Thr <sup>588</sup> , Ser <sup>589</sup>                                                                                                                                                                                                                 |
|     |             |            | E-channel proteins                  | -7.6           | 2.69                  | No binding site was found                                                                                                                                                                                                                                                                                                                                                                                                       |
|     |             |            | Spike Open Protein                  | -6.24          | 26.62                 | Arg <sup>355</sup> , Tyr <sup>396</sup> , Pro <sup>426</sup> , Asp <sup>428</sup> , Phe <sup>429</sup> , Thr <sup>430</sup> , Phe <sup>464</sup> , Ser <sup>514</sup> , Phe <sup>515</sup> , Glu <sup>516</sup> , Leu <sup>517</sup> , Leu <sup>518</sup>                                                                                                                                                                       |
|     |             |            | Spike Close Protein                 | -6.7           | 12.25                 | Glu <sup>96</sup> , Asn <sup>99</sup> , Ile <sup>101</sup> , Arg <sup>102</sup> , Gly <sup>103</sup> , Trp <sup>104</sup> , Ile <sup>119</sup> , Asn <sup>121</sup> , Val <sup>126</sup> , Ile <sup>128</sup> , Arg <sup>190</sup> , Phe <sup>192</sup> , Ile <sup>203</sup> , Val <sup>227</sup>                                                                                                                               |
| 97  | Rhamnetin   | 5281691    | Main Protease (MPro)                | -7.55          | 2.91                  | Met <sup>49</sup> , Phe <sup>140</sup> , Leu <sup>141</sup> , Asn <sup>142</sup> , Gly <sup>143</sup> , Ser <sup>144</sup> , Cys <sup>145</sup> , His <sup>163</sup> , Met <sup>165</sup> , Glu <sup>166</sup> , Leu <sup>167</sup> , Pro <sup>168</sup> , His <sup>172</sup> , Val <sup>186</sup> , Arg <sup>188</sup> , Gln <sup>189</sup> , Thr <sup>190</sup> , Gln <sup>192</sup>                                          |
|     |             |            | Papain like protease (PLPro)        | -8.82          | 0.35                  | Cys <sup>155</sup> , Asn <sup>156</sup> , Lys <sup>157</sup> , Glu <sup>161</sup> , Leu <sup>162</sup> , Gly <sup>163</sup> , Glu <sup>167</sup> , Tyr <sup>171</sup> , Gln <sup>269</sup>                                                                                                                                                                                                                                      |
|     |             |            | RNA-dependent RNA polymerase (RdRP) | -7.49          | 3.23                  | Tyr <sup>456</sup> , Arg <sup>553</sup> , Ala <sup>554</sup> , Arg <sup>555</sup> , Thr <sup>556</sup> , Ala <sup>558</sup> , Tyr <sup>619</sup> , Pro <sup>620</sup> , Lys <sup>621</sup> , Cys <sup>622</sup> , Asp <sup>623</sup> , Arg <sup>624</sup> , Lys <sup>676</sup> , Thr <sup>680</sup> , Ser <sup>681</sup> , Ser <sup>682</sup>                                                                                   |
|     |             |            | Helicase                            | -7.72          | 2.201                 | Asn <sup>177</sup> , Arg <sup>178</sup> , Thr <sup>199</sup> , Phe <sup>200</sup> , Glu <sup>201</sup> , Tyr <sup>515</sup> , Asn <sup>516</sup> , Ser <sup>517</sup> , Asn <sup>519</sup> , Ala <sup>520</sup> , Thr <sup>530</sup> , Gln <sup>531</sup> , Thr <sup>532</sup> , Asp <sup>534</sup>                                                                                                                             |
|     |             |            | E-channel proteins                  | -6.89          | 8.96                  | No binding site was found                                                                                                                                                                                                                                                                                                                                                                                                       |

| Sr. | Ligands    | PubChem ID | Proteins                            | Binding energy | Dissociation Constant | Active site residues                                                                                                                                                                                                                                                                                                                                                                                                        |
|-----|------------|------------|-------------------------------------|----------------|-----------------------|-----------------------------------------------------------------------------------------------------------------------------------------------------------------------------------------------------------------------------------------------------------------------------------------------------------------------------------------------------------------------------------------------------------------------------|
|     |            |            |                                     | (kcal/mol)     | ( $\mu$ M)            |                                                                                                                                                                                                                                                                                                                                                                                                                             |
|     |            |            | Spike Open Protein                  | -7.07          | 6.6                   | Phe <sup>329</sup> , Pro <sup>330</sup> , Asn <sup>331</sup> , Ile <sup>332</sup> , Thr <sup>333</sup> , Asn <sup>334</sup> , Leu <sup>335</sup> , Val <sup>362</sup> , Gly <sup>526</sup> , Pro <sup>527</sup> , Lys <sup>528</sup> , Lys <sup>529</sup> , Ser <sup>530</sup> , Gln <sup>580</sup>                                                                                                                         |
|     |            |            | Spike Close Protein                 | -7.26          | 4.81                  | Met <sup>740</sup> , Tyr <sup>741</sup> , Ile <sup>742</sup> , Cys <sup>743</sup> , Gly <sup>744</sup> , Lys <sup>854</sup> , Asn <sup>856</sup> , Val <sup>963</sup> , Leu <sup>966</sup> , Ser <sup>967</sup> , Ser <sup>975</sup> , Val <sup>976</sup> , Leu <sup>977</sup> , Asn <sup>978</sup> , Arg <sup>1000</sup>                                                                                                   |
| 98  | Rhodioliin | 14778358   | Main Protease (MPro)                | -9.05          | 0.23                  | Thr <sup>25</sup> , His <sup>41</sup> , Cys <sup>44</sup> , Thr <sup>45</sup> , Ser <sup>46</sup> , Met <sup>49</sup> , Leu <sup>141</sup> , Asn <sup>142</sup> , Gly <sup>143</sup> , Ser <sup>144</sup> , Cys <sup>145</sup> , His <sup>163</sup> , Met <sup>165</sup> , Glu <sup>166</sup> , Leu <sup>167</sup> , Pro <sup>168</sup> , Arg <sup>188</sup> , Gln <sup>189</sup> , Thr <sup>190</sup> , Gln <sup>192</sup> |
|     |            |            | Papain like protease (PLPro)        | -9.26          | 0.16                  | Val <sup>187</sup> , Gln <sup>195</sup> , Thr <sup>197</sup> , Glu <sup>203</sup> , Met <sup>206</sup> , Tyr <sup>207</sup> , Met <sup>208</sup> , Gly <sup>209</sup> , Ile <sup>222</sup> , Pro <sup>223</sup> , Lys <sup>232</sup>                                                                                                                                                                                        |
|     |            |            | RNA-dependent RNA polymerase (RdRP) | -8.13          | 1.09                  | Asp <sup>452</sup> , Tyr <sup>456</sup> , Arg <sup>553</sup> , Ala <sup>554</sup> , Arg <sup>555</sup> , Thr <sup>556</sup> , Asp <sup>618</sup> , Tyr <sup>619</sup> , Pro <sup>620</sup> , Lys <sup>621</sup> , Cys <sup>622</sup> , Asp <sup>623</sup> , Arg <sup>624</sup> , Ser <sup>759</sup> , Asp <sup>760</sup> , Asp <sup>761</sup> , Cys <sup>813</sup> , Ser <sup>814</sup>                                     |
|     |            |            | Helicase                            | -8.53          | 0.561                 | Pro <sup>406</sup> , Arg <sup>409</sup> , Thr <sup>410</sup> , Leu <sup>412</sup> , Thr <sup>413</sup> , Thr <sup>416</sup> , Leu <sup>417</sup> , Pro <sup>419</sup> , Phe <sup>422</sup> , Ser <sup>486</sup> , Ala <sup>487</sup> , Tyr <sup>515</sup> , Asn <sup>516</sup> , His <sup>554</sup> , Asn <sup>557</sup> , Asn <sup>559</sup> , Arg <sup>560</sup>                                                          |
|     |            |            | E-channel proteins                  | -8.58          | 0.51                  | Leu <sup>28</sup> , Val <sup>29</sup> , Ala <sup>32</sup> , Ile <sup>33</sup> , Ala <sup>36</sup> , Leu <sup>37</sup>                                                                                                                                                                                                                                                                                                       |
|     |            |            | Spike Open Protein                  | -8.68          | 0.43                  | Arg <sup>102</sup> , Gly <sup>103</sup> , Trp <sup>104</sup> , Ile <sup>119</sup> , Asn <sup>121</sup> , Val <sup>126</sup> , Ile <sup>128</sup> , Phe <sup>168</sup> , Tyr <sup>170</sup> , Ser <sup>172</sup> , Arg <sup>190</sup> , Phe <sup>192</sup> , Ile <sup>203</sup> , His <sup>207</sup> , Leu <sup>226</sup> , Val <sup>227</sup> , Asp <sup>228</sup> , Leu <sup>229</sup>                                     |
|     |            |            | Spike Close Protein                 | -7.54          | 2.97                  | Ser <sup>46</sup> , Val <sup>47</sup> , Leu <sup>48</sup> , Lys <sup>278</sup> , Thr <sup>302</sup> , Leu <sup>303</sup> , Lys <sup>304</sup> , Ser <sup>305</sup> , Phe <sup>306</sup> , Thr <sup>307</sup> , Ala <sup>956</sup> , Gln <sup>957</sup> , Asn <sup>960</sup> , Thr <sup>961</sup> , Lys <sup>964</sup>                                                                                                       |
|     |            |            | Main Protease (MPro)                | -6.46          | 18.52                 | Met <sup>6</sup> , Ala <sup>7</sup> , Phe <sup>8</sup> , Pro <sup>9</sup> , Thr <sup>111</sup> , Ser <sup>113</sup> , Gln <sup>127</sup> , Asp <sup>295</sup> , Arg <sup>298</sup> , Gln <sup>299</sup>                                                                                                                                                                                                                     |
|     |            |            | Papain like protease (PLPro)        | -6.36          | 21.93                 | No binding site was found                                                                                                                                                                                                                                                                                                                                                                                                   |
|     |            |            | RNA-dependent RNA polymerase (RdRP) | -5.81          | 54.92                 | Gly <sup>616</sup> , Trp <sup>617</sup> , Asp <sup>618</sup> , Asp <sup>761</sup> , Ala <sup>762</sup> , Val <sup>763</sup> , Lys <sup>798</sup> , Cys <sup>799</sup> , Trp <sup>800</sup> , Glu <sup>811</sup> , Phe <sup>812</sup> , Cys <sup>813</sup> , Ser <sup>814</sup>                                                                                                                                              |

| Sr. | Ligands              | PubChem ID | Proteins                            | Binding energy | Dissociation Constant | Active site residues                                                                                                                                                                                                                                                                                 |
|-----|----------------------|------------|-------------------------------------|----------------|-----------------------|------------------------------------------------------------------------------------------------------------------------------------------------------------------------------------------------------------------------------------------------------------------------------------------------------|
|     |                      |            |                                     | (kcal/mol)     | ( $\mu$ M)            |                                                                                                                                                                                                                                                                                                      |
| 99  | Salicylic acid       | 338        | Helicase                            | -5.98          | 41.432                | Val <sup>496</sup> , Phe <sup>499</sup> , Leu <sup>500</sup> , Thr <sup>501</sup> , Asn <sup>503</sup> , Trp <sup>506</sup> , Arg <sup>507</sup> , Leu <sup>526</sup> , Tyr <sup>543</sup> , Ile <sup>545</sup> , Leu <sup>573</sup>                                                                 |
|     |                      |            | E-channel proteins                  | -5.55          | 86.19                 | Leu <sup>51</sup> , Pro <sup>54</sup> , Tyr <sup>57</sup>                                                                                                                                                                                                                                            |
|     |                      |            | Spike Open Protein                  | -5.09          | 185.15                | Met <sup>740</sup> , Tyr <sup>741</sup> , Gly <sup>744</sup> , Asn <sup>856</sup> , Leu <sup>966</sup> , Ser <sup>975</sup> , Val <sup>976</sup> , Leu <sup>977</sup> , Asn <sup>978</sup> , Arg <sup>1000</sup>                                                                                     |
|     |                      |            | Spike Close Protein                 | -6.25          | 26.14                 | Tyr <sup>38</sup> , Asp <sup>40</sup> , Lys <sup>41</sup> , Val <sup>42</sup> , Phe <sup>43</sup> , Arg <sup>44</sup> , Glu <sup>224</sup> , Pro <sup>225</sup> , Tyr <sup>279</sup> , Gly <sup>283</sup>                                                                                            |
| 100 | Secoisolariciresinol | 65373      | Main Protease (MPro)                | -5.51          | 91.28                 | Trp <sup>218</sup> , Phe <sup>219</sup> , Leu <sup>220</sup> , Asn <sup>221</sup> , Arg <sup>222</sup> , Phe <sup>223</sup> , Glu <sup>270</sup> , Leu <sup>271</sup> , Asn <sup>274</sup> , Gly <sup>275</sup> , Met <sup>276</sup> , Asn <sup>277</sup> , Arg <sup>279</sup>                       |
|     |                      |            | Papain like protease (PLPro)        | -7.12          | 6.09                  | Arg <sup>183</sup> , Leu <sup>185</sup> , Leu <sup>199</sup> , Glu <sup>203</sup> , Met <sup>206</sup> , Tyr <sup>207</sup> , Met <sup>208</sup> , Gly <sup>209</sup> , Ile <sup>222</sup> , Lys <sup>232</sup>                                                                                      |
|     |                      |            | RNA-dependent RNA polymerase (RdRP) | -7.04          | 6.89                  | Asn <sup>404</sup> , Val <sup>405</sup> , Ala <sup>406</sup> , Phe <sup>407</sup> , Thr <sup>409</sup> , Asp <sup>445</sup> , Gly <sup>446</sup> , Asn <sup>447</sup>                                                                                                                                |
|     |                      |            | Helicase                            | -7.04          | 6.889                 | Ala <sup>4</sup> , Val <sup>6</sup> , Arg <sup>15</sup> , Arg <sup>21</sup> , Arg <sup>22</sup> , Pro <sup>23</sup> , Phe <sup>24</sup> , Arg <sup>129</sup> , Leu <sup>132</sup> , Phe <sup>133</sup> , Glu <sup>136</sup> , Pro <sup>234</sup> , Leu <sup>235</sup> , Ser <sup>236</sup>           |
|     |                      |            | E-channel proteins                  | -5.93          | 44.85                 | Leu <sup>28</sup> , Val <sup>29</sup> , Ala <sup>32</sup> , Ile <sup>33</sup>                                                                                                                                                                                                                        |
|     |                      |            | Spike Open Protein                  | -5.41          | 108.43                | Met <sup>740</sup> , Tyr <sup>741</sup> , Ile <sup>742</sup> , Cys <sup>743</sup> , Gly <sup>744</sup> , Asn <sup>856</sup> , Val <sup>963</sup> , Leu <sup>966</sup> , Ser <sup>967</sup> , Ser <sup>975</sup> , Val <sup>976</sup> , Leu <sup>977</sup> , Asn <sup>978</sup> , Arg <sup>1000</sup> |
|     |                      |            | Spike Close Protein                 | -6.15          | 31.2                  | Asn <sup>317</sup> , Arg <sup>319</sup> , Gly <sup>548</sup> , Thr <sup>549</sup> , Gly <sup>550</sup> , Asp <sup>568</sup> , Thr <sup>572</sup> , Thr <sup>573</sup> , Asp <sup>574</sup> , Ile <sup>587</sup> , Pro <sup>589</sup> , Cys <sup>590</sup> , Phe <sup>592</sup>                       |
| 101 | Shikimic acid        | 8742       | Main Protease (MPro)                | -5.19          | 157.19                | Trp <sup>218</sup> , Phe <sup>219</sup> , Leu <sup>220</sup> , Asn <sup>221</sup> , Ser <sup>267</sup> , Glu <sup>270</sup> , Leu <sup>271</sup> , Asn <sup>274</sup> , Gly <sup>275</sup> , Met <sup>276</sup>                                                                                      |
|     |                      |            | Papain like protease (PLPro)        | -5.88          | 48.64                 | Cys <sup>155</sup> , Asn <sup>156</sup> , Lys <sup>157</sup> , Glu <sup>161</sup> , Glu <sup>167</sup> , Tyr <sup>171</sup>                                                                                                                                                                          |
|     |                      |            | RNA-dependent RNA polymerase (RdRP) | -5.03          | 206.96                | Glu <sup>136</sup> , Cys <sup>139</sup> , Phe <sup>157</sup> , Lys <sup>159</sup> , Lys <sup>160</sup> , Asp <sup>161</sup> , Trp <sup>162</sup> , Tyr <sup>163</sup>                                                                                                                                |
|     |                      |            | Helicase                            | -5.55          | 85.322                | Leu <sup>405</sup> , Pro <sup>406</sup> , Leu <sup>412</sup> , Thr <sup>416</sup> , Leu <sup>417</sup> , Pro <sup>419</sup> , Phe <sup>422</sup> , His <sup>554</sup> , Asn <sup>557</sup> , Asn <sup>559</sup> , Arg <sup>560</sup>                                                                 |
|     |                      |            | E-channel proteins                  | -5.1           | 184.21                | No binding site was found                                                                                                                                                                                                                                                                            |

| Sr. | Ligands    | PubChem ID | Proteins                            | Binding energy | Dissociation Constant | Active site residues                                                                                                                                                                                                                                                                                                                                                                                                              |
|-----|------------|------------|-------------------------------------|----------------|-----------------------|-----------------------------------------------------------------------------------------------------------------------------------------------------------------------------------------------------------------------------------------------------------------------------------------------------------------------------------------------------------------------------------------------------------------------------------|
|     |            |            |                                     | (kcal/mol)     | ( $\mu$ M)            |                                                                                                                                                                                                                                                                                                                                                                                                                                   |
|     |            |            | Spike Open Protein                  | -5.2           | 154.82                | Met <sup>740</sup> , Tyr <sup>741</sup> , Ile <sup>742</sup> , Cys <sup>743</sup> , Gly <sup>744</sup> , Phe <sup>855</sup> , Asn <sup>856</sup> , Leu <sup>966</sup> , Leu <sup>977</sup> , Arg <sup>1000</sup>                                                                                                                                                                                                                  |
|     |            |            | Spike Close Protein                 | -5.62          | 76.07                 | Met <sup>740</sup> , Tyr <sup>741</sup> , Ile <sup>742</sup> , Cys <sup>743</sup> , Gly <sup>744</sup> , Asn <sup>856</sup> , Leu <sup>966</sup> , Ser <sup>967</sup> , Ser <sup>975</sup> , Val <sup>976</sup> , Leu <sup>977</sup> , Asn <sup>978</sup> , Asp <sup>979</sup> , Arg <sup>1000</sup>                                                                                                                              |
| 102 | Silyhermin | 10389806   | Main Protease (MPro)                | -8.22          | 0.94                  | Thr <sup>24</sup> , Thr <sup>25</sup> , Thr <sup>26</sup> , Leu <sup>27</sup> , His <sup>41</sup> , Val <sup>42</sup> , Cys <sup>44</sup> , Thr <sup>45</sup> , Ser <sup>46</sup> , Met <sup>49</sup> , Asn <sup>142</sup> , Gly <sup>143</sup> , Met <sup>165</sup> , Glu <sup>166</sup> , Leu <sup>167</sup> , Pro <sup>168</sup> , Arg <sup>188</sup> , Gln <sup>189</sup> , Thr <sup>190</sup> , Gln <sup>192</sup>           |
|     |            |            | Papain like protease (PLPro)        | -9.44          | 0.12                  | Arg <sup>166</sup> , Val <sup>187</sup> , Tyr <sup>207</sup> , Met <sup>208</sup> , Gly <sup>209</sup> , Ile <sup>222</sup> , Pro <sup>223</sup> , Cys <sup>224</sup> , Thr <sup>225</sup> , Ala <sup>230</sup> , Lys <sup>232</sup>                                                                                                                                                                                              |
|     |            |            | RNA-dependent RNA polymerase (RdRP) | -8.25          | 0.9                   | Tyr <sup>149</sup> , Asn <sup>150</sup> , Ala <sup>176</sup> , Asn <sup>177</sup> , Leu <sup>178</sup> , Gly <sup>179</sup> , Glu <sup>180</sup> , Arg <sup>181</sup> , Gln <sup>184</sup> , Thr <sup>248</sup> , Arg <sup>249</sup> , Ala <sup>250</sup> , Thr <sup>252</sup> , Ala <sup>253</sup> , Leu <sup>261</sup>                                                                                                          |
|     |            |            | Helicase                            | -8.81          | 0.351                 | Pro <sup>175</sup> , Asn <sup>177</sup> , Asn <sup>179</sup> , Tyr <sup>180</sup> , Pro <sup>406</sup> , Ala <sup>407</sup> , Pro <sup>408</sup> , Arg <sup>409</sup> , Thr <sup>410</sup> , Leu <sup>412</sup> , Thr <sup>413</sup> , Gly <sup>415</sup> , Thr <sup>416</sup> , Leu <sup>417</sup> , Glu <sup>418</sup> , Pro <sup>419</sup> , Phe <sup>422</sup> , His <sup>554</sup> , Asn <sup>557</sup> , Asn <sup>559</sup> |
|     |            |            | E-channel proteins                  | -8.43          | 0.66                  | Phe <sup>20</sup> , Phe <sup>23</sup> , Val <sup>24</sup> , Leu <sup>27</sup> , Ile <sup>46</sup> , Leu <sup>51</sup> , Pro <sup>54</sup> , Tyr <sup>57</sup>                                                                                                                                                                                                                                                                     |
|     |            |            | Spike Open Protein                  | -7.28          | 4.58                  | Ser <sup>730</sup> , Met <sup>731</sup> , Thr <sup>732</sup> , Lys <sup>733</sup> , Gln <sup>774</sup> , Leu <sup>858</sup> , Thr <sup>859</sup> , Val <sup>860</sup> , Leu <sup>861</sup> , Pro <sup>862</sup> , Pro <sup>863</sup> , Asp <sup>867</sup> , Ile <sup>870</sup> , Leu <sup>959</sup> , Pro <sup>1057</sup> , His <sup>1058</sup>                                                                                   |
|     |            |            | Spike Close Protein                 | -8.05          | 1.25                  | Arg <sup>355</sup> , Tyr <sup>396</sup> , Pro <sup>426</sup> , Asp <sup>428</sup> , Phe <sup>429</sup> , Thr <sup>430</sup> , Lys <sup>462</sup> , Pro <sup>463</sup> , Phe <sup>464</sup> , Ser <sup>514</sup> , Phe <sup>515</sup> , Glu <sup>516</sup> , Leu <sup>517</sup> , Leu <sup>518</sup>                                                                                                                               |
|     |            |            | Main Protease (MPro)                | -8.71          | 0.41                  | Thr <sup>24</sup> , Thr <sup>25</sup> , Thr <sup>26</sup> , Leu <sup>27</sup> , His <sup>41</sup> , Cys <sup>44</sup> , Thr <sup>45</sup> , Ser <sup>46</sup> , Met <sup>49</sup> , Gly <sup>143</sup> , Cys <sup>145</sup> , His <sup>164</sup> , Met <sup>165</sup> , Glu <sup>166</sup> , Leu <sup>167</sup> , Pro <sup>168</sup> , Arg <sup>188</sup> , Gln <sup>189</sup> , Thr <sup>190</sup> , Gln <sup>192</sup>          |
|     |            |            | Papain like protease (PLPro)        | -9.42          | 0.13                  | Pro <sup>59</sup> , Arg <sup>65</sup> , Val <sup>66</sup> , Ala <sup>68</sup> , Phe <sup>69</sup> , Glu <sup>70</sup> , Thr <sup>74</sup> , Thr <sup>75</sup> , Asp <sup>76</sup> , Pro <sup>77</sup> , Phe <sup>79</sup> , Leu <sup>80</sup>                                                                                                                                                                                     |
|     |            |            | RNA-dependent RNA polymerase (RdRP) | -7.8           | 1.91                  | Arg <sup>305</sup> , Glu <sup>474</sup> , Asp <sup>477</sup> , Asp <sup>481</sup> , Cys <sup>482</sup> , Tyr <sup>483</sup> , Asp <sup>484</sup> , Gly <sup>485</sup> , Lys <sup>574</sup> , Arg <sup>640</sup> , Lys <sup>641</sup> , Thr <sup>643</sup> , Val <sup>737</sup> , Thr <sup>739</sup> , Val <sup>742</sup> , Asn <sup>743</sup>                                                                                     |

| Sr. | Ligands      | PubChem ID | Proteins                            | Binding energy | Dissociation Constant | Active site residues                                                                                                                                                                                                                                                                                                                                                          |
|-----|--------------|------------|-------------------------------------|----------------|-----------------------|-------------------------------------------------------------------------------------------------------------------------------------------------------------------------------------------------------------------------------------------------------------------------------------------------------------------------------------------------------------------------------|
|     |              |            |                                     | (kcal/mol)     | ( $\mu$ M)            |                                                                                                                                                                                                                                                                                                                                                                               |
| 103 | Silymarin    | 1548994    | Helicase                            | -8.75          | 0.388                 | Ala <sup>4</sup> , Val <sup>6</sup> , Arg <sup>15</sup> , Ile <sup>20</sup> , Arg <sup>21</sup> , Arg <sup>22</sup> , Pro <sup>23</sup> , Phe <sup>24</sup> , Arg <sup>129</sup> , Leu <sup>130</sup> , Leu <sup>132</sup> , Phe <sup>133</sup> , Glu <sup>136</sup> , Thr <sup>231</sup> , Val <sup>232</sup> , Pro <sup>234</sup> , Leu <sup>235</sup> , Ser <sup>236</sup> |
|     |              |            | E-channel proteins                  | -8.89          | 1.1                   | No binding site was found                                                                                                                                                                                                                                                                                                                                                     |
|     |              |            | Spike Open Protein                  | -7.62          | 2.6                   | Ala <sup>27</sup> , Thr <sup>63</sup> , Trp <sup>64</sup> , Phe <sup>65</sup> , His <sup>66</sup> , Ala <sup>67</sup> , Pro <sup>82</sup> , Asp <sup>138</sup> , Pro <sup>139</sup> , Phe <sup>140</sup> , Thr <sup>240</sup> , Leu <sup>241</sup> , Leu <sup>242</sup> , Tyr <sup>265</sup>                                                                                  |
|     |              |            | Spike Close Protein                 | -7.66          | 2.44                  | Tyr <sup>789</sup> , Lys <sup>790</sup> , Thr <sup>791</sup> , Lys <sup>795</sup> , Ser <sup>803</sup> , Gln <sup>804</sup> , Leu <sup>806</sup> , Pro <sup>807</sup> , Asp <sup>808</sup> , Pro <sup>809</sup> , Lys <sup>814</sup> , Ser <sup>875</sup> , Ala <sup>879</sup>                                                                                                |
| 104 | Sinapic acid | 637775     | Main Protease (MPro)                | -5.96          | 43.14                 | His <sup>41</sup> , Ser <sup>46</sup> , Met <sup>49</sup> , Asn <sup>142</sup> , Cys <sup>145</sup> , His <sup>164</sup> , Met <sup>165</sup> , Glu <sup>166</sup> , Pro <sup>168</sup> , Arg <sup>188</sup> , Gln <sup>189</sup> , Thr <sup>190</sup> , Gln <sup>192</sup>                                                                                                   |
|     |              |            | Papain like protease (PLPro)        | -7.41          | 3.7                   | Phe <sup>69</sup> , His <sup>73</sup> , Thr <sup>74</sup> , Tyr <sup>154</sup> , Tyr <sup>171</sup> , Gln <sup>174</sup> , His <sup>175</sup>                                                                                                                                                                                                                                 |
|     |              |            | RNA-dependent RNA polymerase (RdRP) | -6.03          | 38.08                 | Lys <sup>411</sup> , Pro <sup>412</sup> , Gly <sup>413</sup> , Asn <sup>414</sup> , Phe <sup>441</sup> , Tyr <sup>546</sup> , Val <sup>844</sup> , Asp <sup>845</sup> , Asp <sup>846</sup>                                                                                                                                                                                    |
|     |              |            | Helicase                            | -6.01          | 39.653                | Gln <sup>281</sup> , Asp <sup>401</sup> , Pro <sup>402</sup> , Ala <sup>403</sup> , Pro <sup>419</sup> , Lys <sup>430</sup> , Leu <sup>455</sup> , Tyr <sup>457</sup> , Asp <sup>458</sup> , Asn <sup>459</sup> , Asn <sup>559</sup>                                                                                                                                          |
|     |              |            | E-channel proteins                  | -6.47          | 18.12                 | No binding site was found                                                                                                                                                                                                                                                                                                                                                     |
|     |              |            | Spike Open Protein                  | -5.83          | 53.64                 | Asn <sup>99</sup> , Ile <sup>101</sup> , Arg <sup>102</sup> , Gly <sup>103</sup> , Trp <sup>104</sup> , Ile <sup>119</sup> , Asn <sup>121</sup> , Val <sup>126</sup> , Ile <sup>128</sup> , Arg <sup>190</sup> , Phe <sup>192</sup> , Phe <sup>194</sup> , Ile <sup>203</sup> , His <sup>207</sup> , Val <sup>227</sup>                                                       |
|     |              |            | Spike Close Protein                 | -5.91          | 46.94                 | Glu <sup>96</sup> , Asn <sup>99</sup> , Ile <sup>101</sup> , Arg <sup>102</sup> , Trp <sup>104</sup> , Ile <sup>119</sup> , Asn <sup>121</sup> , Arg <sup>190</sup> , Phe <sup>192</sup> , Phe <sup>194</sup> , Ile <sup>203</sup> , Ser <sup>205</sup> , His <sup>207</sup> , Leu <sup>226</sup>                                                                             |
|     |              |            | Main Protease (MPro)                | -7.92          | 1.56                  | Phe <sup>8</sup> , Lys <sup>102</sup> , Val <sup>104</sup> , Arg <sup>105</sup> , Ile <sup>106</sup> , Gln <sup>107</sup> , Gln <sup>110</sup> , Thr <sup>111</sup> , Asn <sup>151</sup> , Asp <sup>153</sup> , Ser <sup>158</sup> , Thr <sup>292</sup> , Phe <sup>294</sup> , Asp <sup>295</sup> , Val <sup>297</sup> , Arg <sup>298</sup> , Val <sup>303</sup>              |
|     |              |            | Papain like protease (PLPro)        | -10.3          | 0.03                  | Lys <sup>157</sup> , Glu <sup>161</sup> , Leu <sup>162</sup> , Gly <sup>163</sup> , Asp <sup>164</sup> , Glu <sup>167</sup> , Pro <sup>247</sup> , Pro <sup>248</sup> , Tyr <sup>264</sup> , Asn <sup>267</sup> , Tyr <sup>268</sup> , Gln <sup>269</sup> , Tyr <sup>273</sup> , Thr <sup>301</sup>                                                                           |

| Sr. | Ligands      | PubChem ID | Proteins                            | Binding energy | Dissociation Constant | Active site residues                                                                                                                                                                                                                                                                                                                                                                                                                                                        |
|-----|--------------|------------|-------------------------------------|----------------|-----------------------|-----------------------------------------------------------------------------------------------------------------------------------------------------------------------------------------------------------------------------------------------------------------------------------------------------------------------------------------------------------------------------------------------------------------------------------------------------------------------------|
|     |              |            |                                     | (kcal/mol)     | ( $\mu$ M)            |                                                                                                                                                                                                                                                                                                                                                                                                                                                                             |
| 105 | Solophenol A | 66551634   | RNA-dependent RNA polymerase (RdRP) | -6.86          | 9.38                  | Tyr <sup>32</sup> , Ala <sup>46</sup> , Lys <sup>47</sup> , Tyr <sup>129</sup> , His <sup>133</sup> , Asp <sup>135</sup> , Asn <sup>138</sup> , Ala <sup>706</sup> , Ser <sup>709</sup> , Thr <sup>710</sup> , Asp <sup>711</sup> , Lys <sup>714</sup> , Gly <sup>774</sup> , Ser <sup>778</sup> , Lys <sup>780</sup> , Asn <sup>781</sup> , Ser <sup>784</sup>                                                                                                             |
|     |              |            | Helicase                            | -9.4           | 0.13                  | Pro <sup>175</sup> , Leu <sup>176</sup> , Asn <sup>177</sup> , Arg <sup>178</sup> , Thr <sup>199</sup> , Phe <sup>200</sup> , Glu <sup>201</sup> , Lys <sup>202</sup> , Gly <sup>203</sup> , Asp <sup>204</sup> , Val <sup>210</sup> , Tyr <sup>211</sup> , Arg <sup>212</sup> , Val <sup>484</sup> , Ser <sup>486</sup> , Asn <sup>516</sup> , Ser <sup>517</sup> , Asn <sup>519</sup> , Ala <sup>520</sup> , Thr <sup>530</sup> , Thr <sup>532</sup> , Asp <sup>534</sup> |
|     |              |            | E-channel proteins                  | -8.87          | 0.31                  | Leu <sup>28</sup> , Val <sup>29</sup> , Leu <sup>31</sup> , Ala <sup>32</sup> , Thr <sup>35</sup>                                                                                                                                                                                                                                                                                                                                                                           |
|     |              |            | Spike Open Protein                  | -6.28          | 24.8                  | Trp <sup>886</sup> , Gly <sup>889</sup> , Ala <sup>890</sup> , Tyr <sup>904</sup> , Ser <sup>1030</sup> , Glu <sup>1031</sup> , Leu <sup>1034</sup> , Gly <sup>1035</sup> , Gln <sup>1036</sup> , Ser <sup>1037</sup> , Lys <sup>1038</sup>                                                                                                                                                                                                                                 |
|     |              |            | Spike Close Protein                 | -6.93          | 8.39                  | Ile <sup>105</sup> , Leu <sup>118</sup> , Val <sup>120</sup> , Asn <sup>122</sup> , Val <sup>127</sup> , Lys <sup>129</sup> , Phe <sup>133</sup> , Gln <sup>134</sup> , Phe <sup>135</sup> , Cys <sup>136</sup> , Pro <sup>139</sup> , Phe <sup>140</sup> , Leu <sup>141</sup> , Leu <sup>241</sup>                                                                                                                                                                         |
| 106 | Stearic acid | 5281       | Main Protease (MPro)                | -4.22          | 805.32                | Arg <sup>217</sup> , Trp <sup>218</sup> , Phe <sup>219</sup> , Leu <sup>220</sup> , Asn <sup>221</sup> , Arg <sup>222</sup> , Phe <sup>223</sup> , Glu <sup>270</sup> , Leu <sup>271</sup> , Asn <sup>274</sup> , Gly <sup>275</sup>                                                                                                                                                                                                                                        |
|     |              |            | Papain like protease (PLPro)        | -5.69          | 68.05                 | Asp <sup>164</sup> , Met <sup>208</sup> , Pro <sup>247</sup> , Pro <sup>248</sup> , Tyr <sup>264</sup> , Tyr <sup>268</sup> , Tyr <sup>273</sup>                                                                                                                                                                                                                                                                                                                            |
|     |              |            | RNA-dependent RNA polymerase (RdRP) | -4.81          | 300.53                | His <sup>133</sup> , Asn <sup>705</sup> , Ala <sup>706</sup> , Ser <sup>709</sup> , Thr <sup>710</sup> , Phe <sup>766</sup> , Ser <sup>768</sup> , Ala <sup>771</sup> , Ser <sup>772</sup> , Gly <sup>774</sup> , Val <sup>776</sup> , Ser <sup>778</sup> , Ile <sup>779</sup> , Lys <sup>780</sup> , Asn <sup>781</sup> , Thr <sup>801</sup>                                                                                                                               |
|     |              |            | Helicase                            | -4.52          | 485.359               | Gly <sup>3</sup> , Ala <sup>4</sup> , Cys <sup>5</sup> , Val <sup>6</sup> , Gln <sup>11</sup> , Arg <sup>21</sup> , Arg <sup>22</sup> , Pro <sup>23</sup> , Phe <sup>24</sup> , Arg <sup>129</sup> , Leu <sup>132</sup> , Phe <sup>133</sup> , Glu <sup>136</sup> , Pro <sup>234</sup> , Leu <sup>235</sup> , Ser <sup>236</sup>                                                                                                                                            |
|     |              |            | E-channel proteins                  | -5.48          | 95.54                 | No binding site was found                                                                                                                                                                                                                                                                                                                                                                                                                                                   |
|     |              |            | Spike Open Protein                  | -3.38          | 3335.49               | Arg <sup>34</sup> , Leu <sup>189</sup> , Thr <sup>208</sup> , Pro <sup>209</sup> , Ile <sup>210</sup> , Asn <sup>211</sup> , Leu <sup>212</sup> , Pro <sup>217</sup> , Gln <sup>218</sup> , Gly <sup>219</sup> , Ser <sup>221</sup>                                                                                                                                                                                                                                         |
|     |              |            | Spike Close Protein                 | -4.94          | 237.68                | Trp <sup>104</sup> , Ile <sup>119</sup> , Asn <sup>121</sup> , Val <sup>126</sup> , Ile <sup>128</sup> , Phe <sup>168</sup> , Tyr <sup>170</sup> , Ser <sup>172</sup> , Arg <sup>190</sup> , Phe <sup>192</sup> , Phe <sup>194</sup> , Ile <sup>203</sup> , Ser <sup>205</sup> , Leu <sup>226</sup> , Val <sup>227</sup> , Leu <sup>229</sup>                                                                                                                               |
|     |              |            | Main Protease (MPro)                | -4.86          | 276.21                | Met <sup>6</sup> , Ala <sup>7</sup> , Phe <sup>8</sup> , Ser <sup>113</sup> , Gln <sup>127</sup> , Phe <sup>291</sup> , Asp <sup>295</sup> , Arg <sup>298</sup> , Gln <sup>299</sup>                                                                                                                                                                                                                                                                                        |
|     |              |            | Papain like protease (PLPro)        | -5.1           | 181.74                | No binding site was found                                                                                                                                                                                                                                                                                                                                                                                                                                                   |
|     |              |            | RNA-dependent RNA polymerase (RdRP) | -5.08          | 187.66                | Arg <sup>305</sup> , Leu <sup>470</sup> , Phe <sup>471</sup> , Glu <sup>474</sup> , Cys <sup>730</sup> , Asn <sup>734</sup> , Arg <sup>735</sup> , Asp <sup>736</sup> , Val <sup>737</sup> , Asp <sup>738</sup> , Val <sup>742</sup>                                                                                                                                                                                                                                        |

| Sr. | Ligands       | PubChem ID | Proteins                            | Binding energy | Dissociation Constant | Active site residues                                                                                                                                                                                                                                                                                                                                                                                 |
|-----|---------------|------------|-------------------------------------|----------------|-----------------------|------------------------------------------------------------------------------------------------------------------------------------------------------------------------------------------------------------------------------------------------------------------------------------------------------------------------------------------------------------------------------------------------------|
|     |               |            |                                     | (kcal/mol)     | ( $\mu$ M)            |                                                                                                                                                                                                                                                                                                                                                                                                      |
| 107 | Succinic acid | 1110       | Helicase                            | -5.22          | 148.67                | Trp <sup>114</sup> , Tyr <sup>120</sup> , Ala <sup>123</sup> , Asn <sup>124</sup> , Lys <sup>131</sup> , Ala <sup>134</sup> , Ala <sup>135</sup> , Leu <sup>138</sup> , Thr <sup>380</sup> , Asn <sup>381</sup> , Tyr <sup>382</sup> , Arg <sup>409</sup> , Leu <sup>417</sup> , Tyr <sup>421</sup> , Phe <sup>422</sup>                                                                             |
|     |               |            | E-channel proteins                  | -4.05          | 1074.76               | No binding site was found                                                                                                                                                                                                                                                                                                                                                                            |
|     |               |            | Spike Open Protein                  | -4.36          | 633.69                | Met <sup>740</sup> , Tyr <sup>741</sup> , Ile <sup>742</sup> , Cys <sup>743</sup> , Gly <sup>744</sup> , Leu <sup>966</sup> , Ser <sup>975</sup> , Val <sup>976</sup> , Leu <sup>977</sup> , Asn <sup>978</sup> , Arg <sup>1000</sup>                                                                                                                                                                |
|     |               |            | Spike Close Protein                 | -4.63          | 404.48                | Cys <sup>391</sup> , Phe <sup>392</sup> , Thr <sup>393</sup> , Glu <sup>516</sup> , Leu <sup>517</sup> , Leu <sup>518</sup> , His <sup>519</sup> , Ala <sup>520</sup> , Pro <sup>521</sup> , Ala <sup>522</sup> , Asn <sup>544</sup> , Gly <sup>545</sup> , Leu <sup>546</sup> , Phe <sup>565</sup>                                                                                                  |
| 108 | Syringic acid | 10742      | Main Protease (MPro)                | -5.44          | 102.9                 | Phe <sup>8</sup> , Val <sup>104</sup> , Ile <sup>106</sup> , Gln <sup>110</sup> , Thr <sup>111</sup> , Asn <sup>151</sup> , Ile <sup>152</sup> , Asp <sup>153</sup> , Ser <sup>158</sup> , Thr <sup>292</sup> , Phe <sup>294</sup> , Asp <sup>295</sup> , Arg <sup>298</sup>                                                                                                                         |
|     |               |            | Papain like protease (PLPro)        | -6.65          | 13.44                 | Thr <sup>74</sup> , Thr <sup>75</sup> , Asp <sup>76</sup> , Phe <sup>79</sup> , Arg <sup>82</sup> , Ala <sup>153</sup> , Tyr <sup>154</sup> , Asn <sup>156</sup> , Tyr <sup>171</sup> , Gln <sup>174</sup> , His <sup>175</sup>                                                                                                                                                                      |
|     |               |            | RNA-dependent RNA polymerase (RdRP) | -5.74          | 62.44                 | Met <sup>615</sup> , Gly <sup>616</sup> , Trp <sup>617</sup> , Asp <sup>618</sup> , Asp <sup>761</sup> , Ala <sup>762</sup> , Lys <sup>798</sup> , Cys <sup>799</sup> , Trp <sup>800</sup> , His <sup>810</sup> , Glu <sup>811</sup> , Phe <sup>812</sup> , Cys <sup>813</sup> , Ser <sup>814</sup>                                                                                                  |
|     |               |            | Helicase                            | -5.86          | 50.734                | Ala <sup>4</sup> , Val <sup>6</sup> , Arg <sup>21</sup> , Arg <sup>22</sup> , Pro <sup>23</sup> , Phe <sup>24</sup> , Arg <sup>129</sup> , Leu <sup>132</sup> , Phe <sup>133</sup> , Glu <sup>136</sup>                                                                                                                                                                                              |
|     |               |            | E-channel proteins                  | -5.19          | 156.66                | Leu <sup>28</sup> , Leu <sup>31</sup> , Ala <sup>32</sup> , Thr <sup>35</sup> , Cys <sup>40</sup>                                                                                                                                                                                                                                                                                                    |
|     |               |            | Spike Open Protein                  | -5.76          | 59.66                 | Tyr <sup>38</sup> , Asp <sup>40</sup> , Lys <sup>41</sup> , Val <sup>42</sup> , Phe <sup>43</sup> , Arg <sup>44</sup> , Glu <sup>224</sup> , Pro <sup>225</sup> , Tyr <sup>279</sup> , Gly <sup>283</sup>                                                                                                                                                                                            |
|     |               |            | Spike Close Protein                 | -5.43          | 104.3                 | Tyr <sup>38</sup> , Pro <sup>39</sup> , Asp <sup>40</sup> , Lys <sup>41</sup> , Val <sup>42</sup> , Phe <sup>43</sup> , Arg <sup>44</sup> , Glu <sup>224</sup> , Pro <sup>225</sup> , Tyr <sup>279</sup> , Gly <sup>283</sup> , Thr <sup>284</sup>                                                                                                                                                   |
|     |               |            | Main Protease (MPro)                | -6.95          | 8.1                   | Thr <sup>25</sup> , Thr <sup>26</sup> , Leu <sup>27</sup> , His <sup>41</sup> , Cys <sup>44</sup> , Thr <sup>45</sup> , Ser <sup>46</sup> , Met <sup>49</sup> , Asn <sup>142</sup> , Gly <sup>143</sup> , Ser <sup>144</sup> , Cys <sup>145</sup> , Met <sup>165</sup> , Glu <sup>166</sup> , Leu <sup>167</sup> , Arg <sup>188</sup> , Gln <sup>189</sup> , Thr <sup>190</sup> , Gln <sup>192</sup> |
|     |               |            | Papain like protease (PLPro)        | -7.86          | 1.75                  | Arg <sup>166</sup> , Ser <sup>170</sup> , Val <sup>202</sup> , Glu <sup>203</sup> , Met <sup>206</sup> , Tyr <sup>207</sup> , Met <sup>208</sup> , Gly <sup>209</sup> , Ile <sup>222</sup> , Lys <sup>232</sup>                                                                                                                                                                                      |



| Sr. | Ligands            | PubChem ID | Proteins                            | Binding energy | Dissociation Constant | Active site residues                                                                                                                                                                                                                                                                                                                                                                    |
|-----|--------------------|------------|-------------------------------------|----------------|-----------------------|-----------------------------------------------------------------------------------------------------------------------------------------------------------------------------------------------------------------------------------------------------------------------------------------------------------------------------------------------------------------------------------------|
|     |                    |            |                                     | (kcal/mol)     | ( $\mu$ M)            |                                                                                                                                                                                                                                                                                                                                                                                         |
| 109 | Tangeretin         | 68077      | RNA-dependent RNA polymerase (RdRP) | -6.34          | 22.68                 | Phe <sup>35</sup> , Ile <sup>37</sup> , Tyr <sup>38</sup> , Asn <sup>39</sup> , Phe <sup>48</sup> , Leu <sup>49</sup> , Lys <sup>50</sup> , Asp <sup>208</sup> , Asn <sup>209</sup> , Asp <sup>218</sup> , Asp <sup>221</sup> , Asn <sup>713</sup>                                                                                                                                      |
|     |                    |            | Helicase                            | -7.12          | 6.049                 | Ala <sup>135</sup> , Leu <sup>138</sup> , Lys <sup>139</sup> , Glu <sup>142</sup> , Arg <sup>178</sup> , Asn <sup>179</sup> , Cys <sup>309</sup> , Ser <sup>310</sup> , Met <sup>378</sup> , Ala <sup>379</sup> , Thr <sup>380</sup> , Asn <sup>381</sup> , Tyr <sup>382</sup> , Asp <sup>383</sup> , Ala <sup>407</sup> , Pro <sup>408</sup> , Arg <sup>409</sup>                      |
|     |                    |            | E-channel proteins                  | -6.89          | 8.9                   | Leu <sup>31</sup> , Ala <sup>32</sup> , Leu <sup>34</sup> , Thr <sup>35</sup> , Ala <sup>36</sup> , Cys <sup>40</sup>                                                                                                                                                                                                                                                                   |
|     |                    |            | Spike Open Protein                  | -5.66          | 71.35                 | Met <sup>740</sup> , Ile <sup>742</sup> , Cys <sup>743</sup> , Gly <sup>744</sup> , Asp <sup>745</sup> , Phe <sup>855</sup> , Asn <sup>856</sup> , Val <sup>963</sup> , Lys <sup>964</sup> , Leu <sup>966</sup> , Ser <sup>967</sup> , Ser <sup>975</sup> , Val <sup>976</sup> , Leu <sup>977</sup> , Asn <sup>978</sup> , Arg <sup>1000</sup>                                          |
|     |                    |            | Spike Close Protein                 | -6.23          | 26.94                 | Ile <sup>119</sup> , Asn <sup>121</sup> , Val <sup>126</sup> , Ile <sup>128</sup> , Phe <sup>168</sup> , Tyr <sup>170</sup> , Ser <sup>172</sup> , Phe <sup>192</sup> , Ile <sup>203</sup> , Ser <sup>205</sup> , Leu <sup>226</sup> , Val <sup>227</sup> , Asp <sup>228</sup> , Leu <sup>229</sup>                                                                                     |
| 110 | Tetracosanoic acid | 11197      | Main Protease (MPro)                | -4.51          | 498.64                | Arg <sup>131</sup> , Lys <sup>137</sup> , Thr <sup>199</sup> , Tyr <sup>237</sup> , Asn <sup>238</sup> , Tyr <sup>239</sup> , Leu <sup>271</sup> , Leu <sup>272</sup> , Gly <sup>275</sup> , Met <sup>276</sup> , Ala <sup>285</sup> , Leu <sup>286</sup> , Leu <sup>287</sup> , Glu <sup>288</sup> , Asp <sup>289</sup> , Glu <sup>290</sup>                                           |
|     |                    |            | Papain like protease (PLPro)        | -5.49          | 95.06                 | Tyr <sup>207</sup> , Met <sup>208</sup> , Gly <sup>209</sup> , Val <sup>220</sup> , Ile <sup>222</sup> , Pro <sup>223</sup> , Lys <sup>232</sup> , Tyr <sup>268</sup>                                                                                                                                                                                                                   |
|     |                    |            | RNA-dependent RNA polymerase (RdRP) | -4.76          | 326.99                | Lys <sup>411</sup> , Pro <sup>412</sup> , Gly <sup>413</sup> , Asn <sup>414</sup> , Phe <sup>415</sup> , Ser <sup>501</sup> , Asn <sup>543</sup> , Leu <sup>544</sup> , Lys <sup>545</sup> , Tyr <sup>546</sup> , Val <sup>557</sup> , Asp <sup>845</sup> , Asp <sup>846</sup> , Ile <sup>847</sup>                                                                                     |
|     |                    |            | Helicase                            | -4.54          | 471.631               | Ala <sup>4</sup> , Cys <sup>5</sup> , Val <sup>6</sup> , Arg <sup>15</sup> , Arg <sup>21</sup> , Arg <sup>22</sup> , Pro <sup>23</sup> , Phe <sup>24</sup> , Arg <sup>129</sup> , Leu <sup>132</sup> , Phe <sup>133</sup> , Glu <sup>136</sup> , Pro <sup>234</sup> , Leu <sup>235</sup> , Ser <sup>236</sup>                                                                           |
|     |                    |            | E-channel proteins                  | -5.18          | 159.32                | Leu <sup>19</sup> , Ala <sup>22</sup> , Phe <sup>23</sup> , Phe <sup>26</sup>                                                                                                                                                                                                                                                                                                           |
|     |                    |            | Spike Open Protein                  | -4.67          | 378.71                | Tyr <sup>789</sup> , Lys <sup>790</sup> , Thr <sup>791</sup> , Pro <sup>792</sup> , Ile <sup>794</sup> , Lys <sup>795</sup> , Asp <sup>796</sup> , Phe <sup>797</sup> , Gly <sup>798</sup> , Thr <sup>883</sup> , Ser <sup>884</sup> , Ala <sup>893</sup> , Leu <sup>894</sup> , Gln <sup>895</sup> , Ile <sup>896</sup> , Pro <sup>897</sup> , Phe <sup>898</sup> , Ala <sup>899</sup> |
|     |                    |            | Spike Close Protein                 | -3.71          | 1911.03               | Trp <sup>886</sup> , Gly <sup>889</sup> , Ala <sup>890</sup> , Tyr <sup>904</sup> , Ser <sup>1030</sup> , Glu <sup>1031</sup> , L <sup>???</sup> <sup>034</sup> , Gly <sup>1035</sup> , Gln <sup>1036</sup> , Lys <sup>1038</sup>                                                                                                                                                       |
|     |                    |            | Main Protease (MPro)                | -5.22          | 149.93                | Trp <sup>218</sup> , Phe <sup>219</sup> , Asn <sup>221</sup> , Ser <sup>267</sup> , Glu <sup>270</sup> , Leu <sup>271</sup> , Asn <sup>274</sup> , Gly <sup>275</sup> , Met <sup>276</sup> , Asn <sup>277</sup> , Arg <sup>279</sup>                                                                                                                                                    |
|     |                    |            | Papain like protease (PLPro)        | -5.7           | 66.57                 | Leu <sup>185</sup> , Val <sup>187</sup> , Thr <sup>197</sup> , Leu <sup>199</sup> , Glu <sup>203</sup> , Tyr <sup>207</sup> , Met <sup>208</sup> , Lys <sup>232</sup>                                                                                                                                                                                                                   |

| Sr. | Ligands      | PubChem ID | Proteins                            | Binding energy | Dissociation Constant | Active site residues                                                                                                                                                                                                                                      |
|-----|--------------|------------|-------------------------------------|----------------|-----------------------|-----------------------------------------------------------------------------------------------------------------------------------------------------------------------------------------------------------------------------------------------------------|
|     |              |            |                                     | (kcal/mol)     | ( $\mu$ M)            |                                                                                                                                                                                                                                                           |
| 111 | Thymoquinone | 10281      | RNA-dependent RNA polymerase (RdRP) | -5.18          | 160.94                | His <sup>613</sup> , Met <sup>615</sup> , Phe <sup>766</sup> , Ser <sup>768</sup> , Ala <sup>771</sup> , Ser <sup>772</sup> , Ser <sup>778</sup> , Ile <sup>779</sup> , Lys <sup>780</sup> , Thr <sup>801</sup> , Thr <sup>803</sup>                      |
|     |              |            | Helicase                            | -5.73          | 63.288                | Gln <sup>281</sup> , Pro <sup>402</sup> , Ala <sup>403</sup> , Lys <sup>430</sup> , Pro <sup>434</sup> , Phe <sup>437</sup> , Tyr <sup>457</sup> , Asp <sup>458</sup>                                                                                     |
|     |              |            | E-channel proteins                  | -5.71          | 65.57                 | Leu <sup>31</sup> , Ala <sup>32</sup> , Leu <sup>34</sup> , Thr <sup>35</sup> , Cys <sup>40</sup>                                                                                                                                                         |
|     |              |            | Spike Open Protein                  | -4.74          | 338.22                | Glu <sup>554</sup> , Ser <sup>555</sup> , Lys <sup>557</sup> , Lys <sup>558</sup> , Phe <sup>559</sup> , Arg <sup>577</sup> , Leu <sup>582</sup> , Glu <sup>583</sup> , Ile <sup>584</sup>                                                                |
|     |              |            | Spike Close Protein                 | -5.59          | 79.89                 | Trp <sup>104</sup> , Ile <sup>119</sup> , Asn <sup>121</sup> , Val <sup>126</sup> , Ile <sup>128</sup> , Arg <sup>190</sup> , Phe <sup>192</sup> , Phe <sup>194</sup> ??Le <sup>203</sup> , Ser <sup>205</sup> , Leu <sup>226</sup> , Val <sup>227</sup>  |
| 112 | Tyrosine     | 6057       | Main Protease (MPro)                | -5.96          | 42.71                 | Met <sup>6</sup> , Ala <sup>7</sup> , Phe <sup>8</sup> , Pro <sup>9</sup> , Gln <sup>127</sup> , Phe <sup>291</sup> , Asp <sup>295</sup> , Arg <sup>298</sup> , Gln <sup>299</sup> , Val <sup>303</sup> , Thr <sup>304</sup>                              |
|     |              |            | Papain like protease (PLPro)        | -7.05          | 6.85                  | His <sup>73</sup> , Thr <sup>74</sup> , Thr <sup>75</sup> , Asp <sup>76</sup> , Phe <sup>79</sup> , Arg <sup>82</sup> , Ala <sup>153</sup> , Tyr <sup>154</sup> , Asn <sup>156</sup> , His <sup>175</sup>                                                 |
|     |              |            | RNA-dependent RNA polymerase (RdRP) | -5.52          | 89.91                 | Glu <sup>136</sup> , Gly <sup>137</sup> , Asn <sup>138</sup> , Cys <sup>139</sup> , Asp <sup>140</sup> , Lys <sup>143</sup> , Phe <sup>157</sup> , Lys <sup>159</sup> , Lys <sup>160</sup> , Asp <sup>161</sup> , Trp <sup>162</sup> , Tyr <sup>163</sup> |
|     |              |            | Helicase                            | -5.78          | 57.58                 | Pro <sup>406</sup> , Ala <sup>407</sup> , Pro <sup>408</sup> , Arg <sup>409</sup> , Leu <sup>412</sup> , Thr <sup>416</sup> , Leu <sup>417</sup> , Pro <sup>419</sup> , Phe <sup>422</sup> , Asn <sup>557</sup> , Asn <sup>559</sup> , Arg <sup>560</sup> |
|     |              |            | E-channel proteins                  | -5.52          | 89.91                 | Leu <sup>31</sup> , Thr <sup>35</sup> , Cys <sup>40</sup> , Cys <sup>43</sup> , Cys <sup>44</sup> , Val <sup>47</sup>                                                                                                                                     |
|     |              |            | Spike Open Protein                  | -5.97          | 41.78                 | Tyr <sup>38</sup> , Asp <sup>40</sup> , Lys <sup>41</sup> , Val <sup>42</sup> , Phe <sup>43</sup> , Arg <sup>44</sup> , Glu <sup>224</sup> , Pro <sup>225</sup> , Tyr <sup>279</sup> , Asn <sup>282</sup> , Gly <sup>283</sup> , Thr <sup>284</sup>       |
|     |              |            | Spike Close Protein                 | -5.16          | 165.35                | Asp <sup>420</sup> , Tyr <sup>421</sup> , Asn <sup>422</sup> , Tyr <sup>423</sup> , Lys <sup>424</sup> , Arg <sup>454</sup> , Lys <sup>462</sup> , Glu <sup>465</sup> , Arg <sup>466</sup> , Asp <sup>467</sup>                                           |
|     |              |            | Main Protease (MPro)                | -6.06          | 36.02                 | Met <sup>6</sup> , Ala <sup>7</sup> , Phe <sup>8</sup> , Pro <sup>9</sup> , Gln <sup>127</sup> , Asp <sup>295</sup> , Arg <sup>298</sup> , Gln <sup>299</sup> , Gly <sup>302</sup> , Val <sup>303</sup>                                                   |
|     |              |            | Papain like protease (PLPro)        | -5.92          | 45.92                 | Leu <sup>162</sup> , Gly <sup>163</sup> , Asp <sup>164</sup> , Pro <sup>248</sup> , Tyr <sup>264</sup> , Tyr <sup>268</sup> , Tyr <sup>273</sup> , Thr <sup>301</sup>                                                                                     |
|     |              |            | RNA-dependent RNA polymerase (RdRP) | -5.18          | 159.32                | Pro <sup>323</sup> , Phe <sup>326</sup> , Gly <sup>327</sup> , Tyr <sup>346</sup> , Phe <sup>348</sup> , Arg <sup>349</sup> , Asn <sup>628</sup> , Ser <sup>664</sup> , Val <sup>675</sup> , Lys <sup>676</sup> , Pro <sup>677</sup>                      |

| Sr. | Ligands       | PubChem ID | Proteins                            | Binding energy | Dissociation Constant | Active site residues                                                                                                                                                                                                                                                                                                                                                                    |
|-----|---------------|------------|-------------------------------------|----------------|-----------------------|-----------------------------------------------------------------------------------------------------------------------------------------------------------------------------------------------------------------------------------------------------------------------------------------------------------------------------------------------------------------------------------------|
|     |               |            |                                     | (kcal/mol)     | ( $\mu$ M)            |                                                                                                                                                                                                                                                                                                                                                                                         |
| 113 | Tyrosol       | 10393      | Helicase                            | -5.34          | 122.441               | Ala <sup>135</sup> , Leu <sup>138</sup> , Lys <sup>139</sup> , Glu <sup>142</sup> , Thr <sup>380</sup> , Asn <sup>381</sup> , Tyr <sup>382</sup> , Ala <sup>407</sup> , Pro <sup>408</sup> , Arg <sup>409</sup>                                                                                                                                                                         |
|     |               |            | E-channel proteins                  | -5.16          | 163.96                | No binding site was found                                                                                                                                                                                                                                                                                                                                                               |
|     |               |            | Spike Open Protein                  | -4.48          | 517.51                | Gly <sup>908</sup> , Ile <sup>909</sup> , Gln <sup>1036</sup> , Ser <sup>1037</sup> , Lys <sup>1038</sup> , Val <sup>1040</sup> , Tyr <sup>1047</sup> , His <sup>1048</sup>                                                                                                                                                                                                             |
|     |               |            | Spike Close Protein                 | -5.21          | 150.95                | Met <sup>740</sup> , Tyr <sup>741</sup> , Ile <sup>742</sup> , Cys <sup>743</sup> , Gly <sup>744</sup> , Asn <sup>856</sup> , Leu <sup>966</sup> , Ser <sup>967</sup> , Ser <sup>975</sup> , Val <sup>976</sup> , Leu <sup>977</sup> , Asn <sup>978</sup> , Arg <sup>1000</sup>                                                                                                         |
| 114 | Umbelliprenin | 1781413    | Main Protease (MPro)                | -6.84          | 9.67                  | Lys <sup>5</sup> , Arg <sup>131</sup> , Lys <sup>137</sup> , Thr <sup>199</sup> , Tyr <sup>237</sup> , Tyr <sup>239</sup> , Leu <sup>271</sup> , Leu <sup>272</sup> , Gly <sup>275</sup> , Met <sup>276</sup> , Ala <sup>285</sup> , Leu <sup>286</sup> , Leu <sup>287</sup> , Glu <sup>288</sup> , Asp <sup>289</sup> , Glu <sup>290</sup>                                             |
|     |               |            | Papain like protease (PLPro)        | -7.75          | 2.1                   | Arg <sup>166</sup> , Ser <sup>170</sup> , Leu <sup>185</sup> , Val <sup>187</sup> , Gln <sup>195</sup> , Thr <sup>197</sup> , Leu <sup>199</sup> , Val <sup>202</sup> , Glu <sup>203</sup> , Met <sup>206</sup> , Tyr <sup>207</sup> , Met <sup>208</sup> , Thr <sup>225</sup> , Lys <sup>232</sup>                                                                                     |
|     |               |            | RNA-dependent RNA polymerase (RdRP) | -6.74          | 11.49                 | Thr <sup>76</sup> , Phe <sup>77</sup> , Tyr <sup>80</sup> , Glu <sup>84</sup> , Tyr <sup>87</sup> , Asn <sup>88</sup> , Lys <sup>91</sup> , His <sup>99</sup> , Asp <sup>100</sup> , Phe <sup>101</sup> , Phe <sup>102</sup> , Pro <sup>112</sup>                                                                                                                                       |
|     |               |            | Helicase                            | -6.35          | 22.263                | Gly <sup>3</sup> , Ala <sup>4</sup> , Val <sup>6</sup> , Arg <sup>21</sup> , Arg <sup>22</sup> , Pro <sup>23</sup> , Phe <sup>24</sup> , Arg <sup>129</sup> , Leu <sup>132</sup> , Phe <sup>133</sup> , Glu <sup>136</sup> , Pro <sup>234</sup> , Leu <sup>235</sup> , Ser <sup>236</sup>                                                                                               |
|     |               |            | E-channel proteins                  | -8.9           | 0.3                   | No binding site was found                                                                                                                                                                                                                                                                                                                                                               |
|     |               |            | Spike Open Protein                  | -6.5           | 17.34                 | Ser <sup>884</sup> , Gly <sup>885</sup> , Trp <sup>886</sup> , Thr <sup>887</sup> , Ala <sup>890</sup> , Leu <sup>894</sup> , Ile <sup>896</sup> , Gln <sup>901</sup> , Tyr <sup>904</sup> , Arg <sup>905</sup> , Leu <sup>1034</sup> , Gly <sup>1035</sup> , Gln <sup>1036</sup>                                                                                                       |
|     |               |            | Spike Close Protein                 | -8.12          | 1.11                  | Trp <sup>104</sup> , Ile <sup>119</sup> , Asn <sup>121</sup> , Val <sup>126</sup> , Ile <sup>128</sup> , Phe <sup>168</sup> , Tyr <sup>170</sup> , Ser <sup>172</sup> , Arg <sup>190</sup> , Phe <sup>192</sup> , Phe <sup>194</sup> , Ile <sup>203</sup> , Ser <sup>205</sup> , Lys <sup>206</sup> , His <sup>207</sup> , Leu <sup>226</sup> , Val <sup>227</sup> , Leu <sup>229</sup> |
|     |               |            | Main Protease (MPro)                | -5.16          | 165.07                | Met <sup>6</sup> , Ala <sup>7</sup> , Phe <sup>8</sup> , Pro <sup>9</sup> , Gln <sup>127</sup> , Ile <sup>152</sup> , Asp <sup>153</sup> , Tyr <sup>154</sup> , Phe <sup>291</sup> , Asp <sup>295</sup> , Arg <sup>298</sup> , Gln <sup>299</sup> , Val <sup>303</sup> , Thr <sup>304</sup>                                                                                             |
|     |               |            | Papain like protease (PLPro)        | -5.4           | 110.28                | No binding site was found                                                                                                                                                                                                                                                                                                                                                               |
|     |               |            | RNA-dependent RNA polymerase (RdRP) | -4.88          | 265.24                | Lys <sup>411</sup> , Pro <sup>412</sup> , Gly <sup>413</sup> , Asn <sup>414</sup> , Tyr <sup>546</sup> , Asp <sup>845</sup> , Asp <sup>846</sup> , Ile <sup>847</sup> , cser <sup>15</sup>                                                                                                                                                                                              |

| Sr. | Ligands         | PubChem ID | Proteins                            | Binding energy | Dissociation Constant | Active site residues                                                                                                                                                                                                                                                                                                                                             |
|-----|-----------------|------------|-------------------------------------|----------------|-----------------------|------------------------------------------------------------------------------------------------------------------------------------------------------------------------------------------------------------------------------------------------------------------------------------------------------------------------------------------------------------------|
|     |                 |            |                                     | (kcal/mol)     | ( $\mu$ M)            |                                                                                                                                                                                                                                                                                                                                                                  |
| 115 | Undecanoic acid | 8180       | Helicase                            | -4.68          | 371.12                | Pro <sup>406</sup> , Ala <sup>407</sup> , Pro <sup>408</sup> , Arg <sup>409</sup> , Leu <sup>412</sup> , Gly <sup>415</sup> , Thr <sup>416</sup> , Leu <sup>417</sup> , Phe <sup>422</sup> , His <sup>554</sup> , Asn <sup>557</sup> , Asn <sup>559</sup>                                                                                                        |
|     |                 |            | E-channel proteins                  | -5.1           | 182.97                | Leu <sup>51</sup> , Pro <sup>54</sup> , Tyr <sup>57</sup> , Ser <sup>60</sup> , Arg <sup>61</sup>                                                                                                                                                                                                                                                                |
|     |                 |            | Spike Open Protein                  | -5.09          | 187.35                | Glu <sup>96</sup> , Asn <sup>99</sup> , Ile <sup>101</sup> , Arg <sup>102</sup> , Gly <sup>103</sup> , Trp <sup>104</sup> , Ile <sup>119</sup> , Asn <sup>121</sup> , Val <sup>126</sup> , Ile <sup>128</sup> , Arg <sup>190</sup> , Phe <sup>192</sup> , Phe <sup>194</sup> , Ile <sup>203</sup> , Ser <sup>205</sup> , Leu <sup>226</sup> , Val <sup>227</sup> |
|     |                 |            | Spike Close Protein                 | -4.79          | 309.8                 | Glu <sup>96</sup> , Ile <sup>101</sup> , Arg <sup>102</sup> , Trp <sup>104</sup> , Ile <sup>119</sup> , Asn <sup>121</sup> , Val <sup>126</sup> , Ile <sup>128</sup> , Arg <sup>190</sup> , Phe <sup>192</sup> , Phe <sup>194</sup> , Ile <sup>203</sup> , Leu <sup>226</sup> , Val <sup>227</sup>                                                               |
| 116 | Vanillic acid   | 8468       | Main Protease (MPro)                | -5.35          | 120.39                | Trp <sup>218</sup> , Phe <sup>219</sup> , Leu <sup>220</sup> , Asn <sup>221</sup> , Phe <sup>223</sup> , Glu <sup>270</sup> , Leu <sup>271</sup> , Asn <sup>274</sup> , Gly <sup>275</sup> , Met <sup>276</sup>                                                                                                                                                  |
|     |                 |            | Papain like protease (PLPro)        | -6.6           | 14.65                 | No binding site was found                                                                                                                                                                                                                                                                                                                                        |
|     |                 |            | RNA-dependent RNA polymerase (RdRP) | -5.59          | 80.56                 | Tyr <sup>456</sup> , Arg <sup>555</sup> , Thr <sup>556</sup> , Val <sup>557</sup> , Ala <sup>558</sup> , Asp <sup>623</sup> , Arg <sup>624</sup> , Lys <sup>676</sup> , Thr <sup>680</sup> , Ser <sup>681</sup> , Ser <sup>682</sup> , Gly <sup>683</sup>                                                                                                        |
|     |                 |            | Helicase                            | -5.63          | 74.546                | Ala <sup>4</sup> , Val <sup>6</sup> , Arg <sup>21</sup> , Arg <sup>22</sup> , Pro <sup>23</sup> , Phe <sup>24</sup> , Arg <sup>129</sup> , Leu <sup>132</sup> , Phe <sup>133</sup> , Glu <sup>136</sup>                                                                                                                                                          |
|     |                 |            | E-channel proteins                  | -5.55          | 85.18                 | Leu <sup>28</sup> , Leu <sup>31</sup> , Ala <sup>32</sup> , Leu <sup>34</sup> , Thr <sup>35</sup> , Cys <sup>40</sup>                                                                                                                                                                                                                                            |
|     |                 |            | Spike Open Protein                  | -5.67          | 70.15                 | Met <sup>740</sup> , Tyr <sup>741</sup> , Ile <sup>742</sup> , Cys <sup>743</sup> , Gly <sup>744</sup> , Ser <sup>746</sup> , Leu <sup>966</sup> , Ser <sup>967</sup> , Ser <sup>975</sup> , Val <sup>976</sup> , Leu <sup>977</sup> , Asn <sup>978</sup> , Arg <sup>1000</sup>                                                                                  |
