# Supplementary material for: Effectiveness of Natural Antioxidants against SARS-CoV-2? Insights from the In-Silico World
Source: MDPI journal article supplement (doi:10.3390/antibiotics10081011), 2021-08-20
Supplement: s1 [file s1]

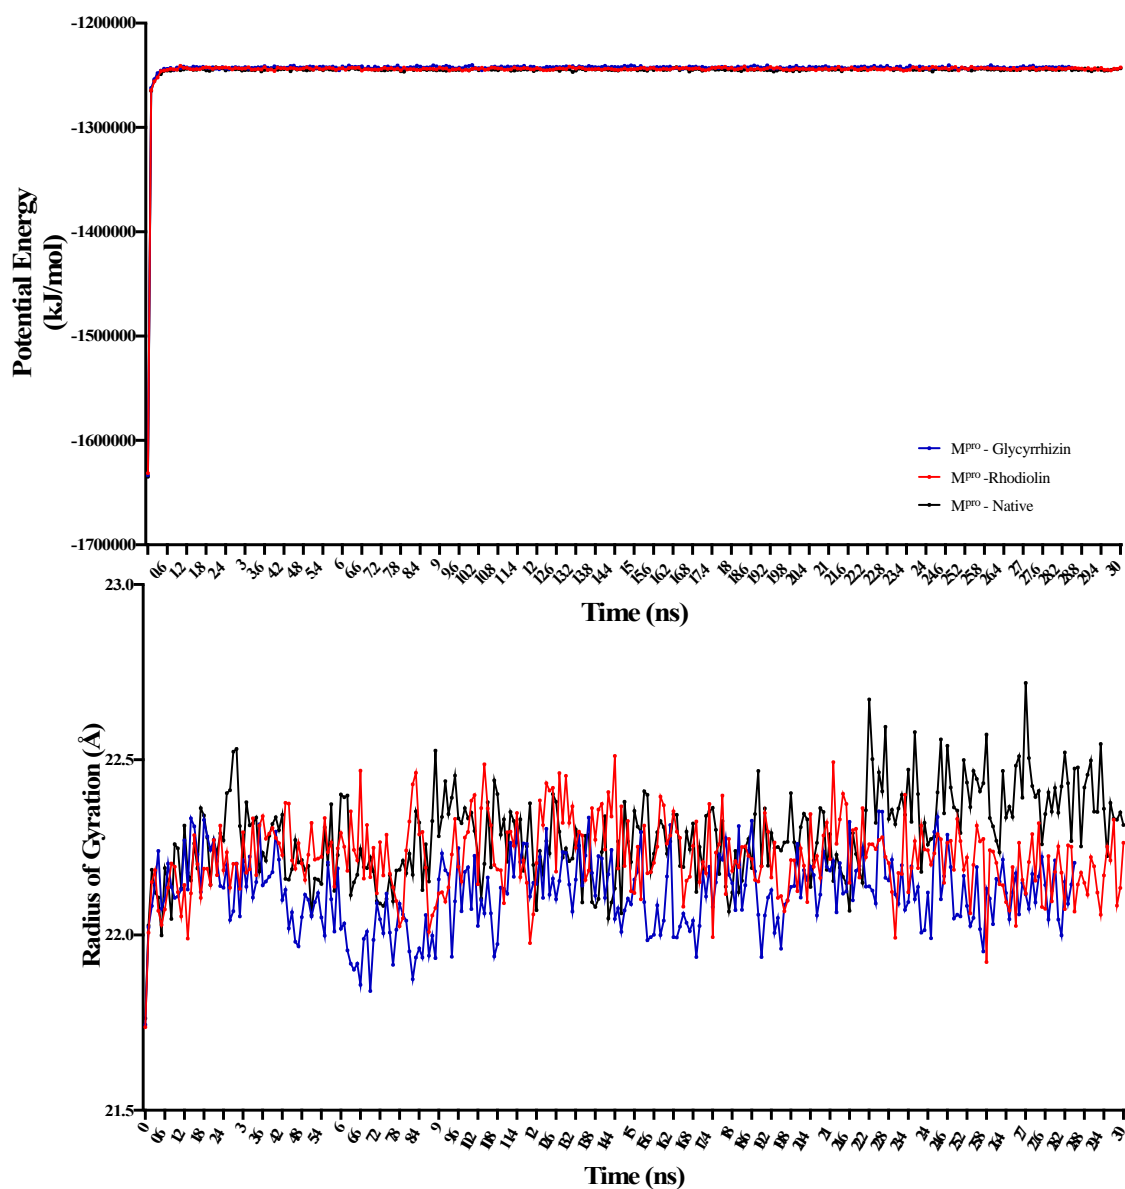

**Figure S1:** 30 ns Molecular dynamics simulation of Glycyrrhizin (blue) and Rhodiolin (red) docked with SARS-CoV-2 main protease (M<sup>Pro</sup>)

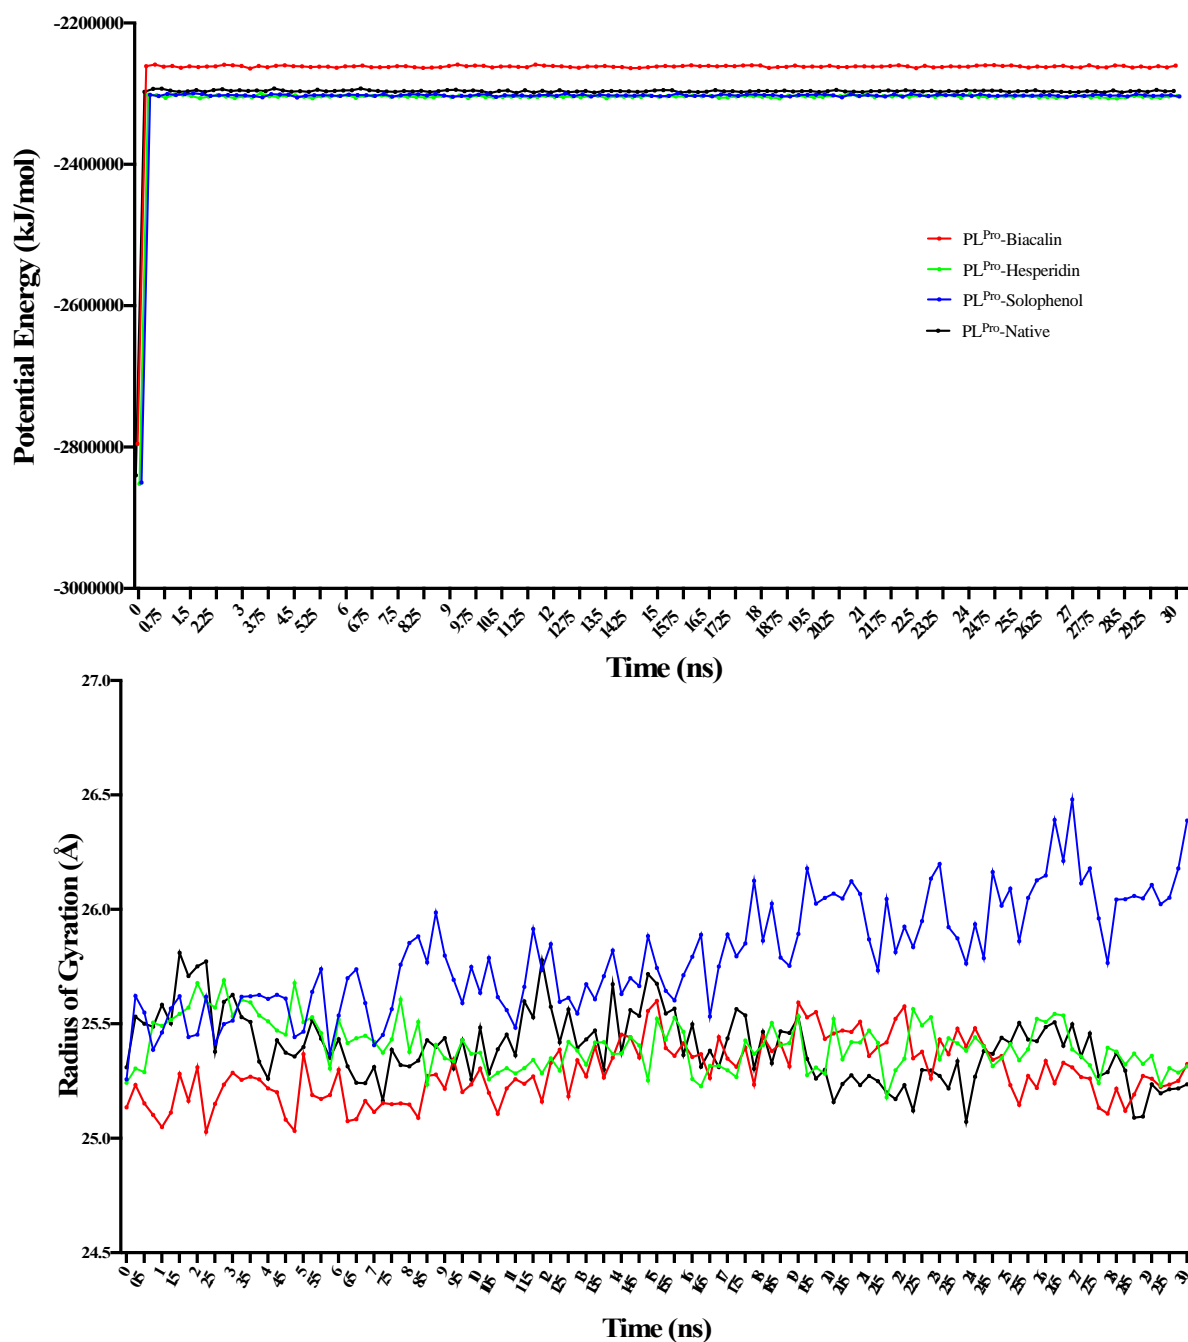

**Figure S2:** 30 ns Molecular dynamics simulation of Baicalin (red), Hesperidin (green), and Solophenol (blue) docked with SARS-CoV-2 PLpro

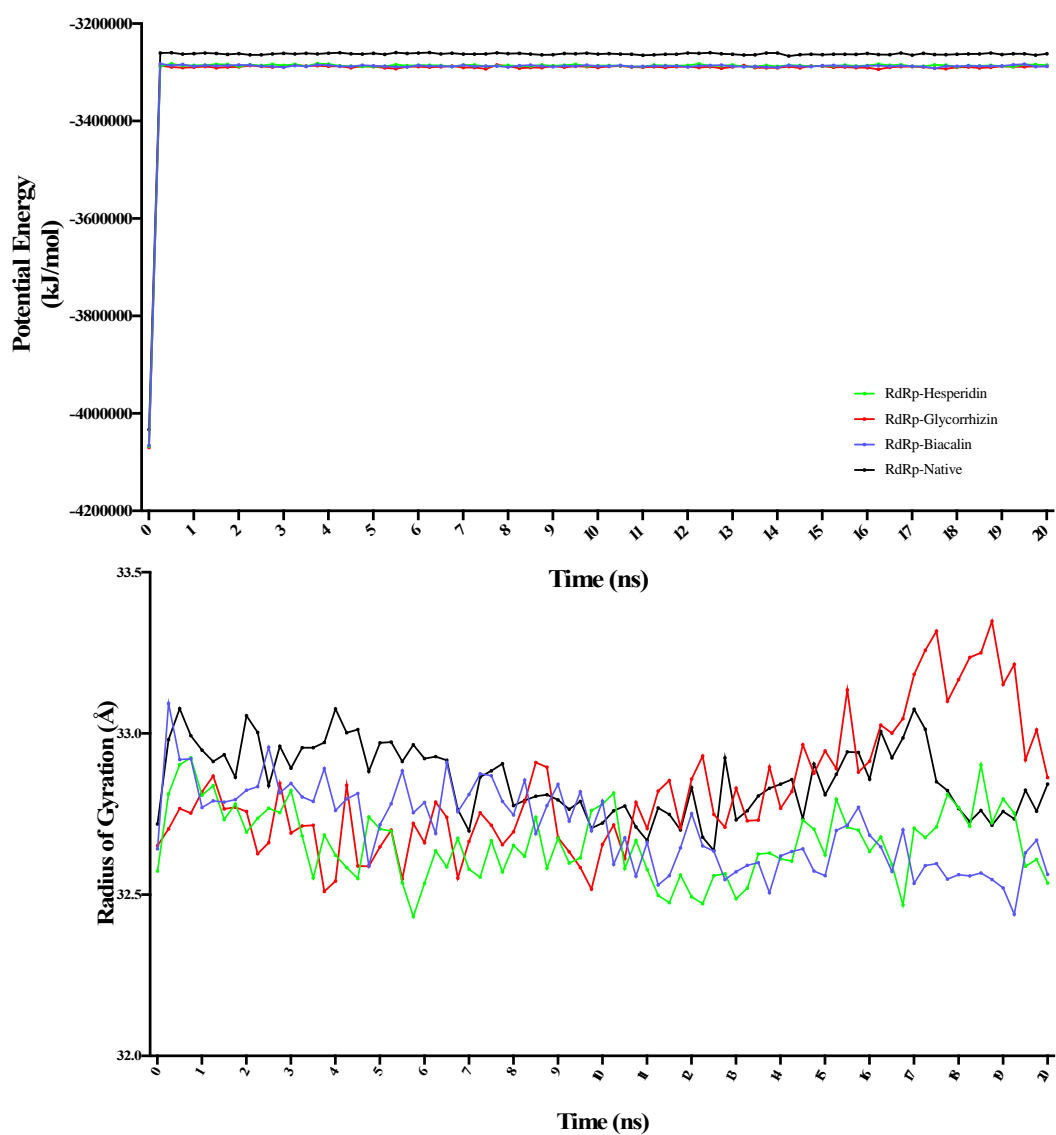

**Figure S3:** 30 ns Molecular dynamics simulation of Glycyrrhizin (red), Hesperidin (green), Baicalin (blue) in complex with SARS-CoV-2 RdRp.

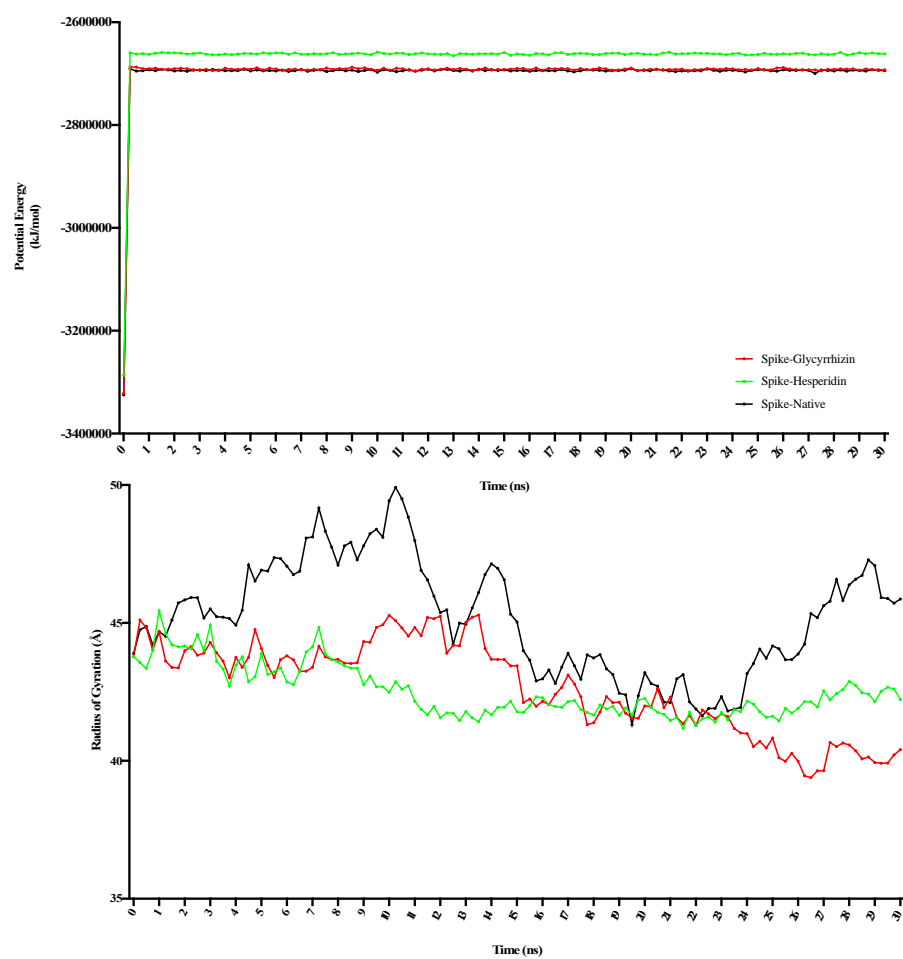

**Figure S4:** 30 ns Molecular dynamics simulation of Glycyrrhizin (red) and Hesperidin (green) in complex with SARS-CoV-2 spike protein (closed state)

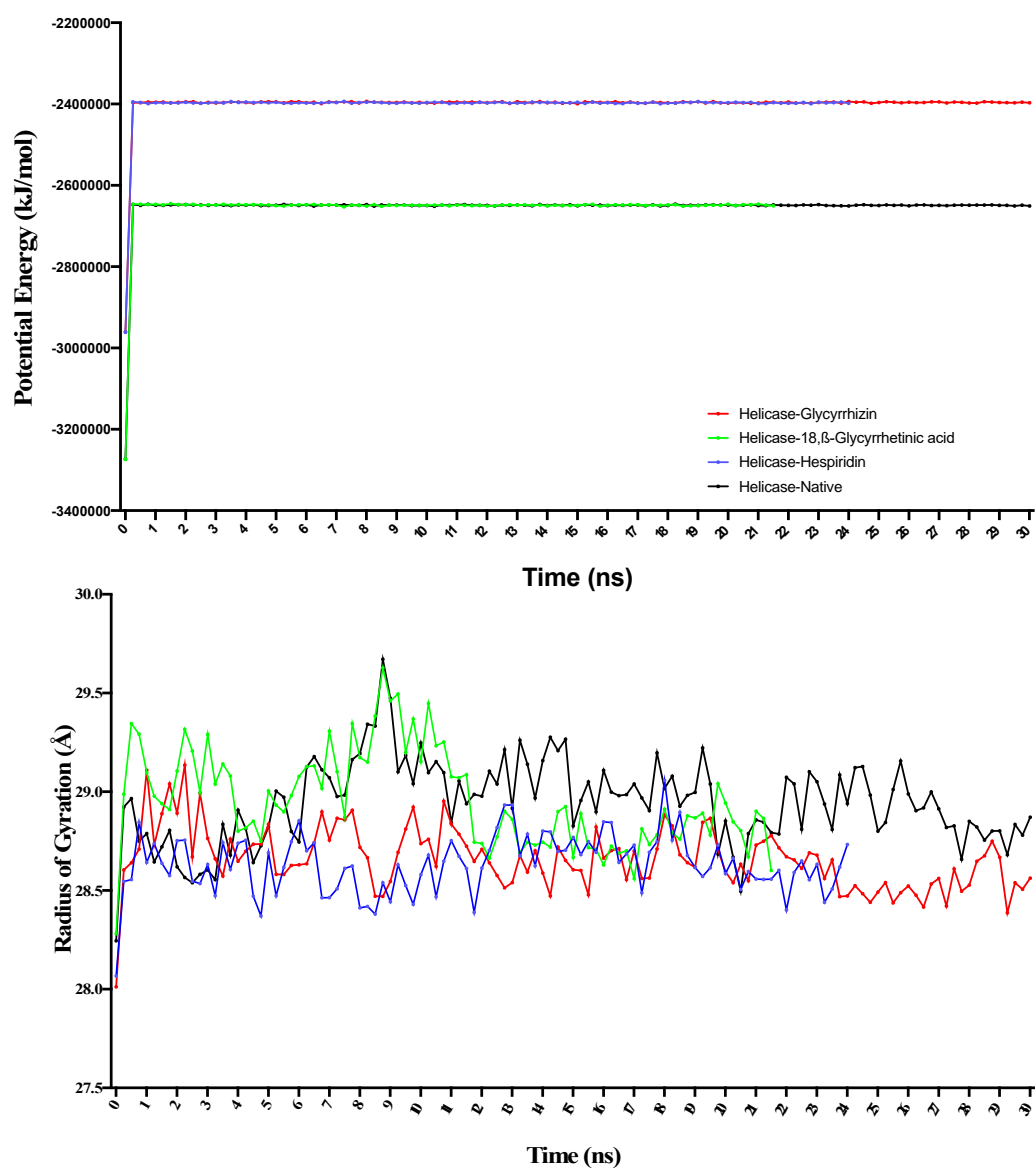

**Figure S5:** 30 ns Molecular dynamics simulation of Glycyrrhizin (red), Hesperidin (green), Baicalin (blue) in complex with SARS-CoV-2 helicase

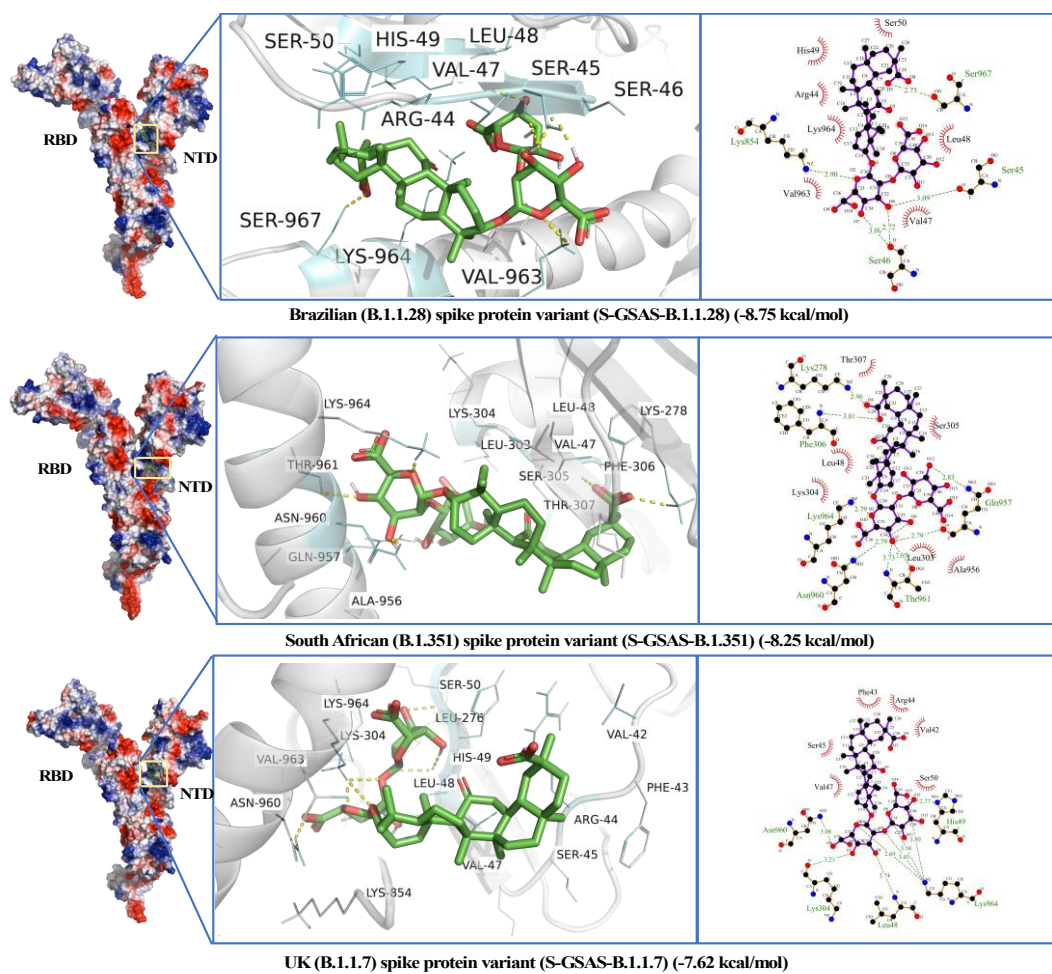

**Figure S6:** Glycyrrhizin interactions with variants of Spike protein of SARS-CoV-2
