# Supplementary material for: Effectiveness of Natural Antioxidants against SARS-CoV-2? Insights from the In-Silico World
Source: MDPI journal article supplement (doi:10.3390/antibiotics10081011), 2021-08-20
Supplement: s1 [file s1]

Table S2b

## Baicalin docking to nonspecific human blood proteins

| PDB ID | Targets                              | Classification       | Energy (Kcal/mol) | Dissoc. constant [nM] | Contacting receptor residues                                                                                                                                                                                                                                                                                                                                                                                                                                                                                          |
|--------|--------------------------------------|----------------------|-------------------|-----------------------|-----------------------------------------------------------------------------------------------------------------------------------------------------------------------------------------------------------------------------------------------------------------------------------------------------------------------------------------------------------------------------------------------------------------------------------------------------------------------------------------------------------------------|
| 3I7H   | Ddb1 (damage specific DNA binding    | Protein binding      | -9.89             | 56.2083555            | Lys <sup>408</sup> , Gly <sup>409</sup> , Leu <sup>410</sup> , Trp <sup>411</sup> , Ser <sup>428</sup> , Thr <sup>457</sup> , Phe <sup>458</sup> , Phe <sup>459</sup> , Ser <sup>502</sup> , Cys <sup>503</sup> , Asn <sup>504</sup> , Cys <sup>540</sup> , Leu <sup>541</sup> , Asp <sup>542</sup> , Ile <sup>543</sup> , Thr <sup>544</sup> , Arg <sup>589</sup> , Ser <sup>590</sup> , Ile <sup>591</sup> , Leu <sup>592</sup> , Leu <sup>638</sup> , Arg <sup>639</sup> , Thr <sup>640</sup> , Tyr <sup>678</sup> |
| 4WB7   | Camp-dependent protein kinase a (c   | Transferase          | -9.67             | 82.3116016            | Leu <sup>104</sup> , Gly <sup>105</sup> , Thr <sup>106</sup> , Gly <sup>107</sup> , Phe <sup>109</sup> , Val <sup>112</sup> , Ala <sup>125</sup> , Lys <sup>127</sup> , Met <sup>175</sup> , Tyr <sup>177</sup> , Val <sup>178</sup> , Glu <sup>182</sup> , Lys <sup>223</sup> , Gly <sup>225</sup> , Asn <sup>226</sup> , Leu <sup>228</sup> , Thr <sup>238</sup> , Asp <sup>239</sup> , Phe <sup>382</sup> , Tyr <sup>385</sup>                                                                                     |
| 4NY0   | Human focal adhesion kinase          | Transferase          | -9.06             | 228.1386875           | Val <sup>95</sup> , Trp <sup>97</sup> , Arg <sup>125</sup> , Ile <sup>126</sup> , Arg <sup>127</sup> , Leu <sup>129</sup> , Phe <sup>147</sup> , Glu <sup>158</sup> , Tyr <sup>251</sup> , Arg <sup>252</sup> , Phe <sup>253</sup> , Asp <sup>254</sup> , Lys <sup>255</sup> , Glu <sup>256</sup> , Cys <sup>257</sup> , Phe <sup>258</sup> , Ile <sup>336</sup> , Asn <sup>339</sup> , Met <sup>340</sup> , Leu <sup>343</sup> , Tyr <sup>347</sup>                                                                  |
| 3ZRO   | Human MTH1                           | Hydrolase            | -8.96             | 272.8336563           | Arg <sup>5</sup> , Tyr <sup>7</sup> , Thr <sup>8</sup> , Leu <sup>9</sup> , Lys <sup>23</sup> , Phe <sup>27</sup> , Asn <sup>33</sup> , Gly <sup>36</sup> , Gly <sup>37</sup> , Lys <sup>38</sup> , Glu <sup>56</sup> , Phe <sup>72</sup> , Met <sup>81</sup> , Val <sup>83</sup> , Glu <sup>100</sup> , Met <sup>101</sup>                                                                                                                                                                                           |
| 4IA0   | The PDE5A1 catalytic domain          | Hydrolase            | -8.94             | 281.24975             | Tyr <sup>612</sup> , His <sup>513</sup> , His <sup>517</sup> , Val <sup>660</sup> , Met <sup>681</sup> , Glu <sup>682</sup> , Thr <sup>723</sup> , Arg <sup>724</sup> , Leu <sup>725</sup> , Ala <sup>726</sup> , Asp <sup>764</sup> , Leu <sup>765</sup> , Ile <sup>768</sup> , Val <sup>782</sup> , Gln <sup>817</sup> , Phe <sup>820</sup>                                                                                                                                                                         |
| 1OE9   | Myosin V motor                       | ATPASE/myosin        | -8.9              | 300.385875            | Ala <sup>11</sup> , Arg <sup>15</sup> , Arg <sup>63</sup> , Asn <sup>64</sup> , Pro <sup>65</sup> , Asp <sup>66</sup> , Ile <sup>67</sup> , Ala <sup>757</sup> , Glu <sup>760</sup> , Lys <sup>761</sup> , Arg <sup>763</sup> , Ala <sup>764</sup> , Leu <sup>767</sup> , Arg <sup>768</sup> , Cys <sup>771</sup>                                                                                                                                                                                                     |
| 4GWN   | Human mature MEPRIN Beta             | Hydrolase            | -8.88             | 309.651875            | Gly <sup>123</sup> , Cys <sup>124</sup> , Trp <sup>125</sup> , Ser <sup>126</sup> , Ala <sup>148</sup> , Thr <sup>149</sup> , His <sup>152</sup> , Glu <sup>153</sup> , His <sup>156</sup> , His <sup>162</sup> , His <sup>186</sup> , Asn <sup>187</sup> , Val <sup>208</sup> , Met <sup>209</sup> , His <sup>210</sup> , Tyr <sup>211</sup> , Phe <sup>216</sup> , Gly <sup>236</sup> , Arg <sup>238</sup>                                                                                                          |
| 4U7D   | Human RECQ-like helicase             | Hydrolase            | -8.82             | 342.0749375           | Lys <sup>293</sup> , Pro <sup>294</sup> , Ser <sup>295</sup> , Thr <sup>297</sup> , Gly <sup>419</sup> , Phe <sup>420</sup> , Gly <sup>421</sup> , Phe <sup>424</sup> , Arg <sup>425</sup> , Ser <sup>428</sup> , Thr <sup>511</sup> , Pro <sup>512</sup> , Leu <sup>513</sup> , Ile <sup>516</sup> , Glu <sup>540</sup> , Glu <sup>543</sup> , Thr <sup>560</sup> , Ile <sup>567</sup> , Ser <sup>568</sup>                                                                                                          |
| 2CZK   | Human myo-inositol mono-phosphate    | Hydrolase            | -8.66             | 450.4035938           | Asp <sup>101</sup> , Ile <sup>103</sup> , Asp <sup>104</sup> , Gly <sup>105</sup> , Thr <sup>106</sup> , Cys <sup>107</sup> , Asn <sup>108</sup> , Glu <sup>173</sup> , Ile <sup>174</sup> , Gly <sup>175</sup> , Pro <sup>176</sup> , Lys <sup>177</sup> , Arg <sup>178</sup> , Leu <sup>183</sup> , Gly <sup>205</sup> , Leu <sup>227</sup> , His <sup>228</sup> , Trp <sup>230</sup> , Asp <sup>231</sup>                                                                                                          |
| 4FAD   | PI3KA and MTOR                       | Transferase          | -8.64             | 462.7325              | Leu <sup>842</sup> , Gly <sup>843</sup> , Ile <sup>844</sup> , Gly <sup>845</sup> , Asp <sup>846</sup> , Ile <sup>868</sup> , Leu <sup>869</sup> , Tyr <sup>872</sup> , Val <sup>883</sup> , Pro <sup>884</sup> , Phe <sup>885</sup> , Phe <sup>1031</sup> , Met <sup>1034</sup> , Leu <sup>1035</sup> , Met <sup>1039</sup> , Leu <sup>1042</sup> , Glu <sup>1046</sup> , Asp <sup>1047</sup> , Tyr <sup>1050</sup>                                                                                                  |
| 4MWS   | Human PPCA (trigonal crystal form 1  | Hydrolase            | -8.62             | 482.6755              | Gln <sup>363</sup> , Ile <sup>364</sup> , Glu <sup>392</sup> , Glu <sup>415</sup> , Phe <sup>416</sup> , Ser <sup>418</sup> , His <sup>418</sup> , Ile <sup>419</sup> , Ala <sup>420</sup> , Arg <sup>445</sup> , Phe <sup>446</sup> , Lys <sup>449</sup> , Gln <sup>450</sup> , Pro <sup>451</sup> , Tyr <sup>452</sup>                                                                                                                                                                                              |
| 5K10   | Isocitrate dehydrogenase (IDH1)      | Oxidoreductase       | -8.61             | 488.412               | Lys <sup>72</sup> , Cys <sup>73</sup> , Ala <sup>74</sup> , Thr <sup>75</sup> , Ile <sup>76</sup> , Thr <sup>77</sup> , Arg <sup>82</sup> , Ser <sup>84</sup> , Pro <sup>95</sup> , Asn <sup>96</sup> , Arg <sup>109</sup> , Glu <sup>306</sup> , Ala <sup>307</sup> , Ala <sup>308</sup> , His <sup>309</sup> , Gly <sup>310</sup> , Thr <sup>311</sup> , Val <sup>312</sup> , Thr <sup>313</sup> , Arg <sup>314</sup>                                                                                               |
| 6FFI   | MGLUR5 in complex with MMPEP         | Membrane protein     | -8.52             | 573.3531875           | Leu <sup>673</sup> , Ala <sup>674</sup> , Ser <sup>676</sup> , Lys <sup>677</sup> , Ile <sup>680</sup> , Asn <sup>745</sup> , Arg <sup>746</sup> , Val <sup>752</sup> , Leu <sup>756</sup> , Tyr <sup>765</sup> , Ala <sup>770</sup> , Arg <sup>773</sup> , Ala <sup>774</sup> , Lys <sup>920</sup> , Asn <sup>923</sup> , Val <sup>924</sup> , Pro <sup>925</sup>                                                                                                                                                    |
| 2XMS   | Human NDRG2 protein                  | Signaling protein    | -8.51             | 580.167375            | Tyr <sup>41</sup> , Asn <sup>60</sup> , Tyr <sup>61</sup> , Lys <sup>62</sup> , Phe <sup>65</sup> , Gln <sup>66</sup> , Phe <sup>69</sup> , Gln <sup>70</sup> , Arg <sup>83</sup> , His <sup>85</sup> , Arg <sup>87</sup> , Met <sup>91</sup> , Glu <sup>92</sup> , Glu <sup>93</sup>                                                                                                                                                                                                                                 |
| 5HZJ   | Intersectin1 containing wildtype LO  | Signaling protein    | -8.43             | 660.6859375           | Glu <sup>1287</sup> , Pro <sup>1471</sup> , Ile <sup>1588</sup> , Ser <sup>1589</sup> , Glu <sup>1590</sup> , Gln <sup>1591</sup> , Leu <sup>1592</sup> , Val <sup>1593</sup> , Ser <sup>1596</sup> , Val <sup>1597</sup> , Thr <sup>1598</sup> , Asn <sup>1599</sup> , Arg <sup>1604</sup> , Thr <sup>1661</sup> , Pro <sup>1662</sup> , Phe <sup>1664</sup>                                                                                                                                                         |
| 2G6P   | Truncated (delta 1-89) human meth    | Hydrolase            | -8.41             | 690.3245625           | Glu <sup>128</sup> , Gln <sup>129</sup> , Leu <sup>131</sup> , Lys <sup>132</sup> , Gly <sup>133</sup> , Tyr <sup>195</sup> , Tyr <sup>196</sup> , His <sup>212</sup> , Tyr <sup>300</sup> , Cys <sup>301</sup> , His <sup>303</sup> , Leu <sup>308</sup> , His <sup>310</sup> , Thr <sup>311</sup> , Ala <sup>312</sup> , Asn <sup>314</sup> , Trp <sup>353</sup>                                                                                                                                                    |
| 1W6K   | Human OSC                            | Isomerase            | -8.37             | 729.8651875           | Gly <sup>11</sup> , Pro <sup>13</sup> , Tyr <sup>14</sup> , Tyr <sup>54</sup> , Gly <sup>57</sup> , Asp <sup>97</sup> , Trp <sup>370</sup> , Leu <sup>373</sup> , Leu <sup>682</sup> , Pro <sup>688</sup> , Gln <sup>689</sup> , Thr <sup>705</sup> , Arg <sup>708</sup>                                                                                                                                                                                                                                              |
| 3EHI   | Human thymidylate synthase M190      | Transferase          | -8.37             | 731.0980625           | Ile <sup>82</sup> , Lys <sup>93</sup> , Gly <sup>94</sup> , Ser <sup>95</sup> , Thr <sup>96</sup> , Asn <sup>97</sup> , Glu <sup>100</sup> , Phe <sup>137</sup> , Arg <sup>140</sup> , His <sup>141</sup> , Met <sup>149</sup> , Glu <sup>150</sup> , Ser <sup>151</sup> , Asp <sup>152</sup> , Tyr <sup>153</sup> , Ser <sup>154</sup> , Asp <sup>189</sup> , Lys <sup>292</sup>                                                                                                                                     |
| 3GR4   | Human pyruvate kinase M2             | Transferase          | -8.36             | 741.0366875           | Phe <sup>5</sup> , Gly <sup>115</sup> , Asn <sup>118</sup> , Arg <sup>119</sup> , Leu <sup>353</sup> , Asp <sup>354</sup> , Gly <sup>355</sup> , Ile <sup>389</sup> , Tyr <sup>390</sup> , Gln <sup>393</sup> , Leu <sup>394</sup> , Glu <sup>397</sup> , Leu <sup>398</sup> , Leu <sup>401</sup> , Arg <sup>445</sup>                                                                                                                                                                                                |
| 5IOH   | Repoman-PP1A (protein phosphatase    | Hydrolase/protein bi | -8.33             | 778.210375            | His <sup>66</sup> , Arg <sup>96</sup> , His <sup>125</sup> , Ile <sup>130</sup> , Tyr <sup>134</sup> , Trp <sup>206</sup> , Arg <sup>221</sup> , Val <sup>223</sup> , His <sup>248</sup> , Gln <sup>249</sup> , Val <sup>250</sup> , Tyr <sup>272</sup> , Phe <sup>276</sup>                                                                                                                                                                                                                                          |
| 2QX4   | Quinone reductase ii                 | Oxidoreductase       | -8.27             | 866.9810625           | Ala <sup>10</sup> , His <sup>15</sup> , Gln <sup>17</sup> , Ser <sup>16</sup> , Phe <sup>17</sup> , Arg <sup>22</sup> , Pro <sup>102</sup> , Leu <sup>203</sup> , Tyr <sup>104</sup> , Pro <sup>109</sup> , Ile <sup>111</sup> , Thr <sup>147</sup> , Thr <sup>148</sup> , Gly <sup>149</sup> , Ala <sup>191</sup> , Pro <sup>192</sup> , Glu <sup>193</sup>                                                                                                                                                          |
| 3EHT   | The extracellular domain of human c  | Membrane protein     | -8.23             | 927.534375            | His <sup>285</sup> , Asp <sup>254</sup> , Ala <sup>253</sup> , Arg <sup>251</sup> , Tyr <sup>250</sup> , Asn <sup>249</sup> , Tyr <sup>178</sup> , Lys <sup>174</sup> , Tyr <sup>173</sup> , Ile <sup>20</sup> , Met <sup>19</sup> , Pro <sup>18</sup> , Asn <sup>17</sup> , Ile <sup>16</sup>                                                                                                                                                                                                                        |
| 5HEX   | Human hexokinase 2                   | Transferase          | -8.19             | 993.9931875           | Ser <sup>155</sup> , Phe <sup>156</sup> , Pro <sup>157</sup> , Asn <sup>208</sup> , Asp <sup>209</sup> , Thr <sup>210</sup> , Thr <sup>213</sup> , Ile <sup>229</sup> , Thr <sup>232</sup> , Gly <sup>233</sup> , Ser <sup>234</sup> , Asn <sup>235</sup> , Glu <sup>260</sup> , Gln <sup>291</sup> , Glu <sup>294</sup> , Asp <sup>413</sup> , Gly <sup>448</sup> , Ser <sup>449</sup>                                                                                                                               |
| 4JKJ   | The S18Y variant of ubiquitin carbox | Hydrolase            | -8.14             | 1081.518375           | Gly <sup>72</sup> , Gln <sup>73</sup> , Val <sup>75</sup> , Pro <sup>77</sup> , Val <sup>79</sup> , Tyr <sup>80</sup> , Phe <sup>81</sup> , Glu <sup>122</sup> , Lys <sup>123</sup> , Met <sup>124</sup> , Ser <sup>125</sup> , Pro <sup>126</sup> , Arg <sup>129</sup> , Phe <sup>181</sup> , Pro <sup>182</sup>                                                                                                                                                                                                     |
| 5T40   | Human EXOG (hexog)                   | Hydrolase            | -8.14             | 1085.175375           | Arg <sup>109</sup> , Ser <sup>137</sup> , Arg <sup>138</sup> , His <sup>140</sup> , Pro <sup>143</sup> , Ala <sup>144</sup> , Gly <sup>145</sup> , Gln <sup>166</sup> , Phe <sup>168</sup> , Asn <sup>171</sup> , Ser <sup>172</sup> , Trp <sup>175</sup> , Asn <sup>176</sup> , Glu <sup>179</sup> , Leu <sup>311</sup> , Arg <sup>314</sup>                                                                                                                                                                         |
| 5L6D   | The human METTL3-METTL14 compl       | Transferase          | -8.12             | 1120.539375           | Asp <sup>395</sup> , Pro <sup>396</sup> , Pro <sup>397</sup> , Trp <sup>398</sup> , Ile <sup>400</sup> , Pro <sup>405</sup> , Tyr <sup>406</sup> , Thr <sup>408</sup> , Trp <sup>431</sup> , Thr <sup>433</sup> , Trp <sup>457</sup> , Lys <sup>459</sup> , Glu <sup>481</sup> , Val <sup>507</sup> , Arg <sup>508</sup> , Ser <sup>510</sup> , Thr <sup>510</sup> , Ser <sup>511</sup> , His <sup>512</sup> , Lys <sup>513</sup>                                                                                     |
| 2QFZ   | Human tbc1 domain family member      | Hydrolase activator  | -8.1              | 1151.211875           | Phe <sup>129</sup> , Lys <sup>169</sup> , Leu <sup>370</sup> , Asp <sup>372</sup> , Gly <sup>373</sup> , Ile <sup>374</sup> , Gln <sup>375</sup> , Trp <sup>379</sup> , Tyr <sup>442</sup> , Gln <sup>443</sup> , Glu <sup>445</sup> , Pro <sup>446</sup> , Asp <sup>447</sup> , Gly <sup>448</sup> , Phe <sup>449</sup> , Ser <sup>450</sup>                                                                                                                                                                         |
| 2JOS   | Exon junction                        | Hydrolase            | -8.08             | 1186.72325            | Thr <sup>30</sup> , Ser <sup>62</sup> , Ala <sup>63</sup> , Ile <sup>64</sup> , Arg <sup>67</sup> , Ser <sup>82</sup> , Gln <sup>83</sup> , Thr <sup>86</sup> , Ile <sup>239</sup> , Leu <sup>240</sup> , Val <sup>241</sup> , Glu <sup>245</sup> , Leu <sup>248</sup> , Glu <sup>249</sup> , Gly <sup>250</sup> , Gly <sup>372</sup>                                                                                                                                                                                 |
| 2V5Y   | The receptor protein tyrosine phosph | Hydrolase            | -8.04             | 1280.368125           | Gln <sup>402</sup> , Val <sup>403</sup> , Gly <sup>404</sup> , Ser <sup>430</sup> , Tyr <sup>432</sup> , Thr <sup>433</sup> , Asn <sup>434</sup> , Glu <sup>485</sup> , Pro <sup>486</sup> , Thr <sup>487</sup> , Gln <sup>488</sup> , Thr <sup>489</sup> , Tyr <sup>490</sup> , Gly <sup>491</sup> , Val <sup>492</sup>                                                                                                                                                                                              |
| 3R6I   | AKR1C3                               | Oxidoreductase       | -8.01             | 1335.549875           | Gln <sup>6</sup> , Cys <sup>7</sup> , His <sup>14</sup> , Phe <sup>15</sup> , Met <sup>16</sup> , Pro <sup>17</sup> , Leu <sup>19</sup> , Gly <sup>45</sup> , Phe <sup>46</sup> , Arg <sup>47</sup> , His <sup>48</sup> , Glu <sup>77</sup> , Asp <sup>78</sup> , Ile <sup>79</sup> , Phe <sup>80</sup> , Asp <sup>112</sup> , Val <sup>281</sup> , Phe <sup>284</sup>                                                                                                                                                |
| 3MWE   | Truncated human ATP-citrate lyase    | Transferase          | -8                | 1367.484              | Val <sup>56</sup> , Lys <sup>58</sup> , Gly <sup>67</sup> , Val <sup>72</sup> , Val <sup>74</sup> , Asn <sup>75</sup> , Phe <sup>110</sup> , Pro <sup>112</sup> , His <sup>113</sup> , Gln <sup>115</sup> , Glu <sup>118</sup> , Gly <sup>139</sup> , Val <sup>140</sup> , Asn <sup>203</sup> , Pro <sup>204</sup> , Leu <sup>215</sup> , Asp <sup>216</sup>                                                                                                                                                          |
| 4OJ2   | Aquaporin                            | Transport protein    | -7.97             | 1431.2435             | Leu <sup>28</sup> , Ala <sup>31</sup> , Leu <sup>32</sup> , Asn <sup>33</sup> , Leu <sup>38</sup> , Pro <sup>39</sup> , Ser <sup>40</sup> , Val <sup>41</sup> , Ile <sup>44</sup> , Phe <sup>48</sup> , Asn <sup>115</sup> , Ala <sup>117</sup> , Val <sup>118</sup> , Asn <sup>119</sup> , Ala <sup>120</sup> , Ser <sup>122</sup> , Ile <sup>176</sup> , His <sup>177</sup> , Thr <sup>179</sup> , Gly <sup>180</sup> , Arg <sup>187</sup>                                                                          |
| 5GNT   | BDLP-like folding of Mitofusin 1     | Hydrolase            | -7.9              | 1621.646625           | Ala <sup>199</sup> , Asp <sup>200</sup> , Val <sup>201</sup> , Phe <sup>202</sup> , Leu <sup>227</sup> , Ser <sup>228</sup> , Lys <sup>229</sup> , Pro <sup>230</sup> , Asn <sup>231</sup> , Arg <sup>279</sup> , Cys <sup>327</sup> , Ser <sup>331</sup> , Lys <sup>334</sup> , Thr <sup>335</sup>                                                                                                                                                                                                                   |
| 5WG5   | Human GRK2                           | Transferase          | -7.88             | 1680.155375           | Val <sup>180</sup> , Asn <sup>183</sup> , Ile <sup>184</sup> , His <sup>185</sup> , Leu <sup>186</sup> , Asp <sup>190</sup> , Lys <sup>210</sup> , Arg <sup>617</sup> , Gly <sup>618</sup> , Gln <sup>633</sup> , Cys <sup>634</sup> , Asp <sup>635</sup> , Ser <sup>636</sup> , Asp <sup>637</sup> , Leu <sup>640</sup>                                                                                                                                                                                              |
| 5FN3   | Gamma secretase in class 1 of the ap | Hydrolase            | -7.87             | 1700.123625           | Asn <sup>45</sup> , Lys <sup>16</sup> , Thr <sup>47</sup> , Ala <sup>48</sup> , Pro <sup>49</sup> , Glu <sup>184</sup> , Trp <sup>289</sup> , Asn <sup>290</sup> , Tyr <sup>545</sup> , Gly <sup>547</sup> , Asp <sup>548</sup> , Gly <sup>549</sup> , Pro <sup>550</sup> , Leu <sup>551</sup> , Gln <sup>552</sup> , Asn <sup>562</sup> , Trp <sup>653</sup> , Ile <sup>656</sup>                                                                                                                                    |
| 6PAX   | Human PAX-6 paired domain-DNA c      | Gene regulation      | -7.82             | 1843.592625           | Asn <sup>6</sup> , Phe <sup>12</sup> , Asn <sup>14</sup> , Gly <sup>15</sup> , Arg <sup>16</sup> , Pro <sup>17</sup> , Leu <sup>18</sup> , Arg <sup>23</sup> , Val <sup>45</sup> , Ser <sup>46</sup> , Cys <sup>49</sup> , Lys <sup>52</sup> , Ile <sup>53</sup> , Arg <sup>54</sup> , Pro <sup>65</sup> , Arg <sup>66</sup> , Ile <sup>68</sup>                                                                                                                                                                      |
| 3PUF   | Human RNASE H2 complex               | Hydrolase            | -7.82             | 1846.706875           | Trp <sup>193</sup> , Gln <sup>194</sup> , Phe <sup>195</sup> , Glu <sup>197</sup> , Lys <sup>198</sup> , Leu <sup>199</sup> , Gln <sup>200</sup> , Trp <sup>219</sup> , His <sup>223</sup> , Pro <sup>221</sup> , Phe <sup>233</sup>                                                                                                                                                                                                                                                                                  |
| 6DK3   | Human mitochondrial serine hydrox    | Transferase          | -7.8              | 1926.296875           | Glu <sup>67</sup> , Asn <sup>78</sup> , Phe <sup>79</sup> , Cys <sup>80</sup> , Glu <sup>85</sup> , Leu <sup>88</sup> , Gly <sup>89</sup> , Asn <sup>93</sup> , His <sup>79</sup> , Arg <sup>286</sup> , His <sup>330</sup> , Phe <sup>301</sup> , His <sup>504</sup>                                                                                                                                                                                                                                                 |
| 5HKJ   | Single chain recombinant globular h  | Signaling protein    | -7.79             | 1939.345875           | Arg <sup>12</sup> , Trp <sup>60</sup> , Glu <sup>61</sup> , Asn <sup>85</sup> , Lys <sup>110</sup> , Lys <sup>113</sup> , Gly <sup>115</sup> , His <sup>116</sup> , Ile <sup>117</sup> , Glu <sup>119</sup>                                                                                                                                                                                                                                                                                                           |
| 4KTV   | MAT enzymes: MATA2B                  | Transferase          | -7.73             | 2167.87325            | Lys <sup>89</sup> , His <sup>91</sup> , Gly <sup>92</sup> , Asp <sup>93</sup> , Asp <sup>94</sup> , Ser <sup>96</sup> , Lys <sup>97</sup> , Arg <sup>169</sup> , Gly <sup>171</sup> , Pro <sup>174</sup> , Trp <sup>175</sup> , Leu <sup>176</sup> , Arg <sup>177</sup> , Asp <sup>210</sup>                                                                                                                                                                                                                          |
| 5C5X   | The S156E mutant of human aquapor    | Transport protein    | -7.72             | 2186.2455             | Lys <sup>2</sup> , Lys <sup>3</sup> , Glu <sup>4</sup> , Gln <sup>81</sup> , Ile <sup>82</sup> , Ser <sup>83</sup> , Arg <sup>86</sup> , Leu <sup>230</sup> , Ile <sup>238</sup> , Gly <sup>241</sup> , Thr <sup>242</sup> , Tyr <sup>243</sup> , Glu <sup>244</sup> , Pro <sup>245</sup>                                                                                                                                                                                                                             |
| 6F39   | C1R homodimer CUB1-EGF-CUB2          | Hydrolase            | -7.71             | 2215.96575            | Thr <sup>35</sup> , Gly <sup>79</sup> , Tyr <sup>37</sup> , Arg <sup>38</sup> , Gln <sup>81</sup> , Gly <sup>82</sup> , Asn <sup>93</sup> , Asp <sup>125</sup> , Leu <sup>126</sup> , Asp <sup>127</sup> , Glu <sup>128</sup> , Pro <sup>142</sup> , Tyr <sup>155</sup> , Phe <sup>156</sup> , Asp <sup>168</sup> , Thr <sup>169</sup> , His <sup>170</sup>                                                                                                                                                           |
| 3HRZ   | Human factor B                       | Immune system        | -7.71             | 2227.2145             | Val <sup>204</sup> , Arg <sup>205</sup> , Leu <sup>206</sup> , Lys <sup>251</sup> , Ser <sup>255</sup> , Val <sup>256</sup> , Val <sup>286</sup> , Thr <sup>309</sup> , Glu <sup>310</sup> , Gln <sup>311</sup> , Ser <sup>312</sup> , Tyr <sup>563</sup> , Val <sup>564</sup> , Leu <sup>565</sup> , Asn <sup>566</sup> , Asp <sup>567</sup>                                                                                                                                                                         |
| 4ZWJ   | Rhodopsin bound to arrestin          | Signaling protein    | -7.71             | 2238.5205             | Tyr <sup>43</sup> , Met <sup>44</sup> , Leu <sup>46</sup> , Leu <sup>47</sup> , Ile <sup>59</sup> , Ala <sup>260</sup> , Cys <sup>264</sup> , Phe <sup>293</sup> , Phe <sup>294</sup> , Ser <sup>297</sup> , Ala <sup>298</sup> , Thr <sup>301</sup> , Ile <sup>305</sup>                                                                                                                                                                                                                                             |
| 5Z90   | BRD4 bromodomain 1                   | Transcription        | -7.7              | 2257.4915             | Pro <sup>45</sup> , Pro <sup>48</sup> , Glu <sup>49</sup> , Lys <sup>55</sup> , Thr <sup>98</sup> , Ile <sup>101</sup> , Lys <sup>102</sup> , Thr <sup>103</sup> , Pro <sup>104</sup> , Met <sup>105</sup> , Arg <sup>113</sup> , Tyr <sup>118</sup> , Tyr <sup>119</sup> , Asp <sup>128</sup> , Thr <sup>131</sup>                                                                                                                                                                                                   |
| 5D1M   | UBCH5B                               | Ligase               | -7.68             | 2338.9415             | Arg <sup>72</sup> , Ile <sup>73</sup> , Tyr <sup>74</sup> , His <sup>75</sup> , Ile <sup>78</sup> , Asn <sup>79</sup> , Ser <sup>80</sup> , Val <sup>120</sup> , Glu <sup>122</sup> , Ile <sup>123</sup> , Ile <sup>126</sup> , Lys <sup>133</sup> , Arg <sup>136</sup> , Ile <sup>137</sup> , Glu <sup>140</sup> , Trp <sup>141</sup>                                                                                                                                                                                |

| PDB ID | Targets                              | Classification        | Energy (Kcal/mol) | Dissoc. constant [nM] | Contacting receptor residues                                                                                                                                                                                                                                                                                                                                                           |
|--------|--------------------------------------|-----------------------|-------------------|-----------------------|----------------------------------------------------------------------------------------------------------------------------------------------------------------------------------------------------------------------------------------------------------------------------------------------------------------------------------------------------------------------------------------|
| 1IKN   | IKAPPABALPHA/NF-KAPPAB complex       | Transcription factor  | -7.67             | 2370.73725            | Lys <sup>28</sup> , Ser <sup>51</sup> , Thr <sup>52</sup> , Asp <sup>53</sup> , Lys <sup>221</sup> , Glu <sup>222</sup> , Asp <sup>223</sup> , Ile <sup>224</sup> , Glu <sup>225</sup> , Arg <sup>236</sup> , Gly <sup>237</sup> , Ser <sup>238</sup> , Phe <sup>239</sup> , Ser <sup>240</sup> , Gln <sup>241</sup> , Pro <sup>275</sup>                                              |
| 4UV8   | LSD1(KDM1A)-CoRest                   | Transcription         | -7.65             | 2456.273              | Ala <sup>309</sup> , Arg <sup>310</sup> , Asp <sup>311</sup> , Asn <sup>587</sup> , Ala <sup>588</sup> , Thr <sup>607</sup> , Arg <sup>608</sup> , Ala <sup>636</sup> , Pro <sup>755</sup> , Trp <sup>756</sup>                                                                                                                                                                        |
| 3OE9   | the chemokine CXCR4 receptor         | Signaling protein, hy | -7.64             | 2515.0045             | Trp <sup>94</sup> , Tyr <sup>116</sup> , Thr <sup>117</sup> , Leu <sup>120</sup> , Tyr <sup>121</sup> , Asp <sup>171</sup> , Arg <sup>188</sup> , Phe <sup>199</sup> , Gln <sup>200</sup> , Gln <sup>202</sup> , His <sup>203</sup> , Tyr <sup>255</sup> , Ile <sup>259</sup> , Asp <sup>262</sup> , Leu <sup>266</sup> , His <sup>281</sup> , Ile <sup>284</sup> , Glu <sup>288</sup> |
| 3UVU   | Flap endonuclease 1 (FEN1)           | Protein binding/pept  | -7.61             | 2654.5755             | Ala <sup>148</sup> , Ser <sup>149</sup> , Gly <sup>150</sup> , Thr <sup>155</sup> , Asn <sup>188</sup> , Gly <sup>191</sup> , Asp <sup>192</sup> , Trp <sup>231</sup> , Asn <sup>235</sup> , Arg <sup>238</sup> , Glu <sup>266</sup> , Ala <sup>269</sup> , Asp <sup>270</sup> , Trp <sup>273</sup> , Tyr <sup>277</sup>                                                               |
| 3VJ9   | The human squalene synthase          | Transferase           | -7.61             | 2654.5755             | Ala <sup>301</sup> , Ala <sup>302</sup> , Cys <sup>303</sup> , Tyr <sup>304</sup> , Asn <sup>305</sup> , Asn <sup>306</sup> , Gln <sup>308</sup> , Ala <sup>313</sup> , Val <sup>314</sup> , Lys <sup>315</sup> , Ile <sup>316</sup> , Arg <sup>317</sup> , Gln <sup>320</sup> , Tyr <sup>341</sup> , Arg <sup>348</sup>                                                               |
| 1ZXM   | Human topo IIA ATPASE/AMP-PNP        | Isomerase             | -7.58             | 2768.98325            | Trp <sup>62</sup> , Ile <sup>65</sup> , Asn <sup>71</sup> , Tyr <sup>72</sup> , Arg <sup>73</sup> , Met <sup>273</sup> , Tyr <sup>274</sup> , Lys <sup>276</sup> , Asp <sup>277</sup> , Lys <sup>278</sup> , Lys <sup>306</sup> , Gln <sup>309</sup>                                                                                                                                   |
| 1Z3U   | Angiopoietin-2 receptor binding do   | Signaling protein     | -7.58             | 2773.6605             | Ile <sup>309</sup> , Lys <sup>310</sup> , Gly <sup>331</sup> , Ser <sup>332</sup> , Val <sup>333</sup> , Arg <sup>337</sup> , Glu <sup>341</sup> , Val <sup>344</sup> , Gly <sup>345</sup> , Phe <sup>346</sup> , Gly <sup>347</sup> , Asn <sup>348</sup> , Pro <sup>349</sup> , Tyr <sup>353</sup> , Trp <sup>354</sup> , Leu <sup>355</sup> , Gly <sup>356</sup>                     |
| 4GWG   | 6-phosphogluconate dehydrogenase     | Oxidoreductase        | -7.51             | 3126.77775            | Met <sup>11</sup> , Val <sup>127</sup> , Ser <sup>128</sup> , Gly <sup>129</sup> , Gly <sup>130</sup> , Glu <sup>131</sup> , Glu <sup>132</sup> , Lys <sup>183</sup> , His <sup>186</sup> , Asn <sup>187</sup> , Glu <sup>190</sup> , Phe <sup>230</sup> , Gly <sup>364</sup> , Cys <sup>365</sup> , Ile <sup>366</sup> , Arg <sup>368</sup>                                           |
| 5U7Z   | Human acid ceramidase (ASAH1, aCD    | Hydrolase             | -7.46             | 3396.366              | Ile <sup>76</sup> , Val <sup>77</sup> , Leu <sup>80</sup> , Glu <sup>129</sup> , Ser <sup>132</sup> , Phe <sup>133</sup> , Asn <sup>134</sup> , Ile <sup>135</sup> , Phe <sup>136</sup> , Tyr <sup>137</sup>                                                                                                                                                                           |
| 4IRG   | The ETS transcription factor ERG     | DNA binding protein   | -7.44             | 3548.72825            | Glu <sup>293</sup> , Gln <sup>295</sup> , Ile <sup>298</sup> , Gln <sup>299</sup> , Leu <sup>296</sup> , Trp <sup>334</sup> , Lys <sup>338</sup> , Lys <sup>340</sup> , Met <sup>343</sup> , Lys <sup>347</sup> , Arg <sup>350</sup> , Ala <sup>351</sup> , Tyr <sup>354</sup> , Tyr <sup>355</sup> , Lys <sup>358</sup>                                                               |
| 4MXV   | Lymphotoxin alpha                    | Cytokine/immune sy    | -7.41             | 3695.43               | Leu <sup>43</sup> , Leu <sup>44</sup> , Trp <sup>45</sup> , Ser <sup>63</sup> , Asn <sup>62</sup> , Asn <sup>63</sup> , Ser <sup>64</sup> , Gln <sup>102</sup> , Phe <sup>104</sup> , Phe <sup>110</sup> , His <sup>111</sup> , Ser <sup>148</sup> , Thr <sup>149</sup> , His <sup>150</sup> , Thr <sup>151</sup>                                                                      |
| 4E49   | Carbonic anhydrase (CA)              | Lyase                 | -7.4              | 3783.79075            | Trp <sup>5</sup> , Phe <sup>20</sup> , Asn <sup>62</sup> , His <sup>64</sup> , Ala <sup>65</sup> , Asn <sup>67</sup> , Gln <sup>92</sup> , His <sup>94</sup> , His <sup>96</sup> , Leu <sup>198</sup> , Thr <sup>200</sup> , Pro <sup>201</sup> , Pro <sup>202</sup>                                                                                                                   |
| 1HF0   | DNA-binding domain of OCT-1          | Transcription         | -7.39             | 3835.228              | Asp <sup>41</sup> , Phe <sup>42</sup> , Ser <sup>43</sup> , Thr <sup>44</sup> , Arg <sup>45</sup> , Asn <sup>50</sup> , Lys <sup>52</sup> , Arg <sup>53</sup> , Arg <sup>54</sup> , Lys <sup>103</sup> , Lys <sup>104</sup> , Lys <sup>105</sup>                                                                                                                                       |
| 3OHM   | Activated G alpha Q                  | Signaling protein     | -7.34             | 4165.89825            | Asp <sup>146</sup> , Arg <sup>147</sup> , Arg <sup>148</sup> , Arg <sup>149</sup> , Lys <sup>158</sup> , Asp <sup>236</sup> , Glu <sup>281</sup> , Lys <sup>282</sup> , Met <sup>284</sup> , Tyr <sup>285</sup> , Ser <sup>286</sup>                                                                                                                                                   |
| 3I69   | Apo Glutathione transferase A1-1 GI  | Transferase           | -7.3              | 4434.3505             | Met <sup>108</sup> , Pro <sup>110</sup> , Phe <sup>111</sup> , Cys <sup>112</sup> , Pro <sup>114</sup> , Pro <sup>114</sup> , Glu <sup>210</sup> , Val <sup>213</sup> , Arg <sup>214</sup> , Val <sup>216</sup> , Tyr <sup>217</sup> , Phe <sup>220</sup>                                                                                                                              |
| 4IJI   | ribosomal RNA small subunit methy    | Transferase           | -7.3              | 4471.931              | Ile <sup>151</sup> , Cys <sup>152</sup> , Ala <sup>153</sup> , Lys <sup>154</sup> , Pro <sup>155</sup> , Ser <sup>164</sup> , Lys <sup>167</sup> , Ser <sup>168</sup> , Leu <sup>169</sup> , Val <sup>173</sup> , Leu <sup>174</sup> , Thr <sup>257</sup> , Pro <sup>258</sup> , Asn <sup>259</sup>                                                                                    |
| 3DOF   | Complex of ARL2 and BART             | Signaling protein/hy  | -7.26             | 4784.2675             | Thr <sup>30</sup> , Lys <sup>34</sup> , Glu <sup>39</sup> , Thr <sup>43</sup> , Ile <sup>44</sup> , Ser <sup>45</sup> , Pro <sup>46</sup> , Thr <sup>47</sup> , Leu <sup>48</sup> , Gly <sup>49</sup> , Phe <sup>50</sup> , Asn <sup>51</sup> , Lys <sup>53</sup>                                                                                                                      |
| 5FFG   | Integrin alpha V Beta 6 head         | Cell adhesion         | -7.25             | 4816.6765             | Tyr <sup>18</sup> , Phe <sup>18</sup> , Pro <sup>41</sup> , Trp <sup>55</sup> , Ala <sup>56</sup> , Pro <sup>110</sup> , Leu <sup>111</sup> , Gln <sup>156</sup> , Phe <sup>159</sup> , Pro <sup>174</sup> , Trp <sup>175</sup> , Tyr <sup>221</sup> , Tyr <sup>224</sup>                                                                                                              |
| 4URW   | RAS:SOS complex                      | Signaling protein     | -7.24             | 4923.5305             | Pro <sup>34</sup> , Thr <sup>35</sup> , Glu <sup>36</sup> , Glu <sup>37</sup> , Ser <sup>39</sup> , Tyr <sup>40</sup> , Arg <sup>41</sup> , Asp <sup>54</sup> , Ile <sup>55</sup> , Leu <sup>56</sup> , Asp <sup>57</sup> , Thr <sup>58</sup> , Ala <sup>59</sup> , Gln <sup>61</sup> , Thr <sup>74</sup>                                                                              |
| 5F6D   | UBC9 (K48A/K49A/E54A)                | Ligase                | -7.22             | 5066.847              | Pro <sup>79</sup> , Pro <sup>80</sup> , Leu <sup>81</sup> , Phe <sup>82</sup> , Glu <sup>132</sup> , Arg <sup>147</sup> , Ala <sup>150</sup> , Gln <sup>151</sup> , Lys <sup>154</sup> , Phe <sup>155</sup>                                                                                                                                                                            |
| 5U2P   | Citrate synthase                     | Transferase           | -7.12             | 6028.896              | Gln <sup>45</sup> , Arg <sup>91</sup> , Thr <sup>192</sup> , Tyr <sup>194</sup> , Ser <sup>280</sup> , Ala <sup>281</sup> , Leu <sup>282</sup> , Arg <sup>444</sup> , Ala <sup>444</sup> , Leu <sup>442</sup> , Gly <sup>443</sup> , Phe <sup>444</sup> , Pro <sup>445</sup> , Leu <sup>446</sup>                                                                                      |
| 3R4O   | Heat shock protein 90                | Chaperone             | -7.01             | 7332.7505             | Leu <sup>80</sup> , Glu <sup>200</sup> , Ile <sup>203</sup> , Lys <sup>204</sup> , Val <sup>207</sup> , Lys <sup>208</sup> , Ser <sup>211</sup> , Gln <sup>212</sup> , Tyr <sup>216</sup> , Pro <sup>217</sup> , Ile <sup>218</sup> , Thr <sup>219</sup> , Leu <sup>220</sup>                                                                                                          |
| 5A2E   | Extracellular SRCR domains of huma   | Immune system         | -7                | 7369.974              | Ser <sup>52</sup> , Ser <sup>53</sup> , Cys <sup>54</sup> , Glu <sup>157</sup> , Arg <sup>159</sup> , Arg <sup>225</sup> , Trp <sup>228</sup> , Asp <sup>235</sup> , Cys <sup>240</sup> , Pro <sup>241</sup> , Gly <sup>242</sup> , Leu <sup>243</sup> , Pro <sup>244</sup>                                                                                                            |
| 4A7U   | Human I113T SOD1                     | Oxidoreductase        | -6.99             | 7470.162              | His <sup>48</sup> , Thr <sup>58</sup> , Gly <sup>61</sup> , Pro <sup>62</sup> , His <sup>63</sup> , His <sup>80</sup> , His <sup>120</sup> , Lys <sup>136</sup> , Thr <sup>137</sup> , Asn <sup>139</sup> , Ala <sup>140</sup> , Gly <sup>141</sup> , Ser <sup>142</sup> , Arg <sup>143</sup>                                                                                          |
| 2UW9   | PKB-Beta (AKT2)                      | Transferase           | -6.98             | 7648.78               | Trp <sup>334</sup> , Phe <sup>350</sup> , Glu <sup>365</sup> , Glu <sup>366</sup> , Ile <sup>367</sup> , Phe <sup>369</sup> , Lys <sup>378</sup> , Ser <sup>379</sup> , Ala <sup>382</sup> , Gly <sup>383</sup> , Ser <sup>385</sup> , Lys <sup>386</sup> , Lys <sup>387</sup> , Gln <sup>391</sup> , Arg <sup>392</sup> , Leu <sup>393</sup> , His <sup>406</sup>                     |
| 5FUG   | A human YL1-H2A-Z-H2B complex        | DNA binding protein   | -6.92             | 8449.67               | Ser <sup>73</sup> , Lys <sup>74</sup> , Asp <sup>75</sup> , Lys <sup>77</sup> , Val <sup>78</sup> , Lys <sup>79</sup> , Arg <sup>80</sup> , Thr <sup>82</sup> , Arg <sup>84</sup> , His <sup>85</sup> , Leu <sup>88</sup>                                                                                                                                                              |
| 1JT3   | Human acidic fibroblast growth fact  | Hormone/growth fac    | -6.9              | 8710.316              | Leu <sup>3</sup> , Gly <sup>6</sup> , Asn <sup>7</sup> , Tyr <sup>8</sup> , Lys <sup>12</sup> , Leu <sup>46</sup> , Ser <sup>47</sup> , Ala <sup>48</sup> , Glu <sup>49</sup> , Ser <sup>50</sup> , Val <sup>51</sup> , Val <sup>54</sup> , Glu <sup>87</sup>                                                                                                                          |
| 4IP9   | Human serum amyloid A1               | Protein binding       | -6.9              | 8813.836              | Asp <sup>16</sup> , Arg <sup>19</sup> , Tyr <sup>35</sup> , Arg <sup>39</sup> , Tyr <sup>42</sup> , Asp <sup>43</sup> , Lys <sup>46</sup> , Arg <sup>47</sup> , Asp <sup>91</sup> , Pro <sup>92</sup> , Asn <sup>93</sup> , Arg <sup>96</sup> , Lys <sup>103</sup> , Tyr <sup>104</sup>                                                                                                |
| 4Y5O   | CCM2 HHD in complex with MEK3        | Transferase           | -6.89             | 8963.86               | Leu <sup>299</sup> , Tyr <sup>302</sup> , Leu <sup>322</sup> , Tyr <sup>325</sup> , Arg <sup>326</sup> , Asn <sup>327</sup> , Leu <sup>353</sup> , Phe <sup>356</sup> , Ile <sup>357</sup> , Pro <sup>358</sup>                                                                                                                                                                        |
| 5W45   | AOBEC3H                              | DNA binding protein   | -6.84             | 9622.357              | Leu <sup>11</sup> , Gln <sup>12</sup> , Asn <sup>14</sup> , Lys <sup>16</sup> , Arg <sup>18</sup> , Leu <sup>19</sup> , Arg <sup>20</sup> , Pro <sup>25</sup> , Lys <sup>27</sup> , Thr <sup>28</sup> , Trp <sup>82</sup> , Arg <sup>110</sup>                                                                                                                                         |
| 2FM5   | PDE4D2                               | Hydrolase             | -6.84             | 9671.203              | Lys <sup>65</sup> , Glu <sup>69</sup> , Ser <sup>92</sup> , Ala <sup>93</sup> , Leu <sup>96</sup> , Glu <sup>97</sup> , Val <sup>99</sup> , Thr <sup>119</sup> , Val <sup>120</sup> , His <sup>123</sup> , Thr <sup>124</sup> , Gln <sup>127</sup> , Glu <sup>128</sup> , Ile <sup>143</sup> , Leu <sup>146</sup>                                                                      |
| 2CF9   | Recombinant human thrombin           | Hydrolase/hydrolase   | -6.77             | 10920.869             | Leu <sup>60</sup> , Ile <sup>90</sup> , His <sup>91</sup> , Pro <sup>92</sup> , Arg <sup>93</sup> , Tyr <sup>94</sup> , Asn <sup>95</sup> , Trp <sup>96</sup> , Arg <sup>97</sup> , Asp <sup>100</sup> , Arg <sup>101</sup>                                                                                                                                                            |
| 3BYI   | Human rho GTPASE activating prote    | Signaling protein     | -6.74             | 11468.708             | Phe <sup>372</sup> , Glu <sup>373</sup> , Val <sup>376</sup> , Glu <sup>377</sup> , Lys <sup>380</sup> , Lys <sup>381</sup> , Glu <sup>444</sup> , Thr <sup>445</sup> , Gly <sup>446</sup> , Asn <sup>447</sup> , His <sup>451</sup> , Tyr <sup>454</sup>                                                                                                                              |
| 5N7E   | DBL-homology domain of BCR-ABL       | Signaling protein     | -6.69             | 12436.522             | Tyr <sup>37</sup> , Gln <sup>47</sup> , Glu <sup>48</sup> , Phe <sup>49</sup> , Glu <sup>50</sup> , Val <sup>51</sup> , Pro <sup>52</sup> , Lys <sup>55</sup> , Thr <sup>57</sup> , Ala <sup>58</sup> , Thr <sup>59</sup> , Ile <sup>60</sup> , Ser <sup>61</sup>                                                                                                                      |
| 4W9O   | The FK1 domain of FKBP51             | Isomerase             | -6.69             | 12584.328             | Lys <sup>52</sup> , Tyr <sup>54</sup> , Arg <sup>73</sup> , Glu <sup>75</sup> , Pro <sup>76</sup> , Phe <sup>77</sup> , Val <sup>78</sup> , Leu <sup>135</sup> , Asp <sup>136</sup> , Lys <sup>138</sup>                                                                                                                                                                               |
| 5AIU   | RNF4-ring domain, UBC13-UB (isope    | Ligase/signaling prot | -6.64             | 13600.3               | Tyr <sup>143</sup> , Tyr <sup>193</sup> , Ile <sup>194</sup> , Gly <sup>195</sup> , Ser <sup>196</sup> , Thr <sup>198</sup> , Val <sup>199</sup> , Ser <sup>200</sup> , Cys <sup>201</sup> , Pro <sup>202</sup> , His <sup>225</sup> , Val <sup>226</sup>                                                                                                                              |
| 4X1L   | Mutation-induced destabilization o   | Protein binding       | -6.61             | 14186.45              | Gly <sup>3</sup> , Trp <sup>4</sup> , Tyr <sup>7</sup> , Gly <sup>24</sup> , Trp <sup>22</sup> , Lys <sup>108</sup> , Thr <sup>109</sup> , Leu <sup>135</sup> , Ser <sup>138</sup> , Tyr <sup>140</sup>                                                                                                                                                                                |
| 2Q7N   | LIF receptor (domains 1-5)           | CYTOKINE receptor/C   | -6.61             | 14330.844             | Phe <sup>100</sup> , Trp <sup>199</sup> , Asn <sup>201</sup> , Thr <sup>202</sup> , Thr <sup>204</sup> , Asn <sup>205</sup> , Val <sup>206</sup> , Phe <sup>207</sup> , Gln <sup>209</sup> , Val <sup>274</sup> , Tyr <sup>275</sup> , Gly <sup>276</sup> , Thr <sup>277</sup>                                                                                                         |
| 5OKF   | Human 14-3-3 sigma with the hspb6    | Signaling protein     | -6.6              | 14599.396             | Trp <sup>59</sup> , Glu <sup>66</sup> , Gln <sup>67</sup> , Asn <sup>70</sup> , Arg <sup>85</sup> , Ala <sup>132</sup> , Glu <sup>133</sup> , Val <sup>134</sup> , Ala <sup>135</sup> , Thr <sup>136</sup> , Lys <sup>140</sup> , Glu <sup>182</sup> , Ile <sup>183</sup>                                                                                                              |
| 4ZMV   | Human P-cadherin (SS-X-dimer pock    | Cell adhesion         | -6.55             | 15698.361             | Ser <sup>8</sup> , Arg <sup>68</sup> , Ala <sup>72</sup> , Lys <sup>73</sup> , Ile <sup>97</sup> , Val <sup>98</sup> , Thr <sup>99</sup> , Asp <sup>100</sup> , Asp <sup>137</sup> , Tyr <sup>140</sup> , Thr <sup>141</sup>                                                                                                                                                           |
| 5V23   | Growth factor                        | Signaling protein     | -6.54             | 16128.072             | Pro <sup>36</sup> , Glu <sup>38</sup> , Val <sup>39</sup> , Gln <sup>40</sup> , Thr <sup>42</sup> , Asn <sup>84</sup> , Pro <sup>85</sup> , Met <sup>86</sup> , Val <sup>87</sup> , Leu <sup>105</sup>                                                                                                                                                                                 |
| 3WO2   | Human interleukin-18                 | Immune system         | -6.48             | 17786.768             | Gly <sup>25</sup> , Asn <sup>26</sup> , Arg <sup>27</sup> , Pro <sup>28</sup> , Lys <sup>79</sup> , Ile <sup>80</sup> , Ile <sup>81</sup> , Ser <sup>82</sup> , Phe <sup>83</sup> , Glu <sup>128</sup> , Glu <sup>130</sup> , Lys <sup>135</sup> , Ile <sup>137</sup> , Leu <sup>138</sup> , Lys <sup>139</sup>                                                                        |
| 1QE6   | Interleukin-8                        | Immune system         | -6.44             | 18901.026             | Tyr <sup>13</sup> , Ser <sup>14</sup> , Lys <sup>15</sup> , Pro <sup>16</sup> , Phe <sup>17</sup> , His <sup>18</sup> , Pro <sup>19</sup> , Lys <sup>20</sup> , Leu <sup>51</sup> , Glu <sup>55</sup> , Trp <sup>57</sup> , Val <sup>61</sup> , Lys <sup>64</sup>                                                                                                                      |
| 5M3D   | Tuning of CD81LEL (space group p31   | Cell adhesion         | -6.44             | 19093.406             | Thr <sup>161</sup> , Asn <sup>184</sup> , Leu <sup>185</sup> , Phe <sup>186</sup> , Lys <sup>187</sup> , Glu <sup>188</sup> , Asp <sup>189</sup> , His <sup>192</sup> , Asp <sup>195</sup> , Asn <sup>196</sup> , Lys <sup>201</sup>                                                                                                                                                   |
| 4NYH   | Pir1 dual specificity phosphatase co | Hydrolase             | -6.43             | 19484.064             | Leu <sup>39</sup> , Pro <sup>40</sup> , Val <sup>41</sup> , Gln <sup>43</sup> , Pro <sup>67</sup> , Glu <sup>68</sup> , Glu <sup>69</sup> , Cys <sup>70</sup> , Phe <sup>71</sup> , Asp <sup>75</sup> , Lys <sup>78</sup> , Glu <sup>82</sup> , Gln <sup>83</sup>                                                                                                                      |
| 2X1X   | Structure of VEGF-C in complex with  | Hormone/signaling p   | -6.43             | 19484.064             | Asp <sup>139</sup> , Val <sup>140</sup> , Gly <sup>141</sup> , Lys <sup>142</sup> , Gly <sup>145</sup> , Ala <sup>147</sup> , Thr <sup>148</sup> , Thr <sup>150</sup> , Phe <sup>151</sup> , Phe <sup>152</sup> , Pro <sup>155</sup>                                                                                                                                                   |
| 2J8B   | Human CD59                           | Lipid binding protein | -6.38             | 21199.716             | Tyr <sup>4</sup> , Asp <sup>12</sup> , Lys <sup>14</sup> , Lys <sup>56</sup> , Asp <sup>67</sup> , Leu <sup>68</sup> , Cys <sup>69</sup> , Phe <sup>71</sup> , Asn <sup>72</sup> , Glu <sup>73</sup> , Gln <sup>74</sup>                                                                                                                                                               |
| 3H91   | Human chromobox homolog 2 (CBX)      | Transcription         | -6.37             | 21560.564             | Val <sup>11</sup> , Phe <sup>12</sup> , Ala <sup>13</sup> , Ala <sup>14</sup> , Glu <sup>15</sup> , Cys <sup>16</sup> , Ile <sup>17</sup> , Asn <sup>48</sup> , Ile <sup>49</sup> , Leu <sup>50</sup> , Asp <sup>51</sup> , Arg <sup>53</sup> , Leu <sup>54</sup> , Ala <sup>57</sup>                                                                                                  |
| 2IYB   | Complex between the 3rd LIM doma     | Metal-binding         | -6.35             | 22038.866             | Tyr <sup>16</sup> , Trp <sup>23</sup> , Lys <sup>59</sup> , Asn <sup>71</sup> , Ala <sup>73</sup> , Phe <sup>77</sup> , Gln <sup>78</sup> , Trp <sup>80</sup> , Arg <sup>81</sup> , Val <sup>86</sup>                                                                                                                                                                                  |
| 5HOV   | H88A mutated human transthyretin     | Transport protein     | -6.12             | 32437.582             | Ala <sup>49</sup> , Val <sup>20</sup> , Leu <sup>110</sup> , Leu <sup>111</sup> , Ser <sup>112</sup> , Pro <sup>113</sup> , Tyr <sup>114</sup> , Ser <sup>115</sup> , Tyr <sup>116</sup> , Ser <sup>117</sup>                                                                                                                                                                          |
| 1CWF   | Human cyclophilin A                  | Isomerase/immunosi    | -6.05             | 37001.832             | Thr <sup>68</sup> , Arg <sup>69</sup> , His <sup>70</sup> , Thr <sup>73</sup> , Gly <sup>74</sup> , Gly <sup>75</sup> , Lys <sup>76</sup> , Glu <sup>81</sup> , Lys <sup>82</sup> , Val <sup>86</sup>                                                                                                                                                                                  |
| 5POQ   | BRD1 in complex with N10974A         | Gene regulation       | -6.01             | 39586.184             | Leu <sup>82</sup> , His <sup>83</sup> , Glu <sup>86</sup> , Gly <sup>86</sup> , Arg <sup>122</sup> , Arg <sup>135</sup> , Arg <sup>136</sup> , Asp <sup>139</sup>                                                                                                                                                                                                                      |
| 3KLT   | A vimentin fragment                  | Structural protein    | -5.81             | 55294.196             | Asp <sup>125</sup> , Arg <sup>126</sup> , Phe <sup>232</sup> , Arg <sup>233</sup> , Leu <sup>234</sup> , Lys <sup>235</sup> , Lys <sup>236</sup> , Gln <sup>239</sup>                                                                                                                                                                                                                  |
| 1BL1   | PTH receptor N-terminus fragment     | Hormone receptor      | -5.8              | 55668.764             | Tyr <sup>13</sup> , Lys <sup>15</sup> , Pro <sup>16</sup> , Phe <sup>17</sup> , His <sup>18</sup> , Phe <sup>21</sup> , Leu <sup>43</sup> , Ser <sup>44</sup> , Asp <sup>45</sup> , Arg <sup>47</sup> , Leu <sup>49</sup>                                                                                                                                                              |
