# Supplementary material for: Effectiveness of Natural Antioxidants against SARS-CoV-2? Insights from the In-Silico World
Source: MDPI journal article supplement (doi:10.3390/antibiotics10081011), 2021-08-20
Supplement: s1 [file s1]

**Table S2c** Hesperidine docking to nonspecific human blood proteins

| PDB ID | Targets                                                                   | Classification                | Energy (kcal/mol) | Dissoc. constant [nM] | Contacting receptor residues                                                                                                                                                                                                                                                                                                                                                                                                                                                                                                                                                                                                                    |
|--------|---------------------------------------------------------------------------|-------------------------------|-------------------|-----------------------|-------------------------------------------------------------------------------------------------------------------------------------------------------------------------------------------------------------------------------------------------------------------------------------------------------------------------------------------------------------------------------------------------------------------------------------------------------------------------------------------------------------------------------------------------------------------------------------------------------------------------------------------------|
| 5FFG   | Integrin alpha V Beta 6 head                                              | Cell adhesion                 | -10.89            | 10.4293486            | Phe <sup>21</sup> , Val <sup>23</sup> , Ala <sup>96</sup> , Arg <sup>99</sup> , Lys <sup>101</sup> , Phe <sup>159</sup> , Ser <sup>160</sup> , Asp <sup>162</sup> , Phe <sup>163</sup> , Thr <sup>164</sup> , Lys <sup>165</sup> , Tyr <sup>224</sup> , Ser <sup>225</sup> , Val <sup>226</sup> , Ala <sup>227</sup> , Val <sup>228</sup> , Asp <sup>229</sup> , Phe <sup>278</sup> , Ser <sup>279</sup> , Val <sup>280</sup> , Ala <sup>281</sup> , Ala <sup>282</sup> , Ala <sup>283</sup> , Ile <sup>344</sup> , Ala <sup>345</sup> , Pro <sup>346</sup> , Tyr <sup>407</sup> , Ser <sup>408</sup> , Met <sup>409</sup> , Lys <sup>410</sup> |
| 4GWN   | Human mature MEPRIN Beta                                                  | Hydrolase                     | -10.58            | 17.6884277            | Cys <sup>124</sup> , Trp <sup>125</sup> , Ser <sup>126</sup> , Thr <sup>149</sup> , His <sup>150</sup> , Glu <sup>155</sup> , His <sup>156</sup> , His <sup>162</sup> , Arg <sup>184</sup> , His <sup>186</sup> , Asn <sup>187</sup> , Val <sup>208</sup> , Met <sup>209</sup> , His <sup>210</sup> , Tyr <sup>211</sup> , Ser <sup>212</sup> , Ala <sup>215</sup> , Phe <sup>216</sup> , Gly <sup>236</sup> , Gln <sup>237</sup> , Arg <sup>238</sup>                                                                                                                                                                                          |
| 3I7H   | Ddb1 (damage specific DNA binding protein 1)                              | Protein binding               | -10.27            | 29.4979043            | Trp <sup>111</sup> , Pro <sup>412</sup> , Tyr <sup>422</sup> , Ser <sup>502</sup> , Cys <sup>503</sup> , Asn <sup>504</sup> , Cys <sup>540</sup> , Leu <sup>541</sup> , Asp <sup>542</sup> , Ile <sup>543</sup> , Thr <sup>544</sup> , Pro <sup>545</sup> , Leu <sup>546</sup> , Arg <sup>589</sup> , Ser <sup>590</sup> , Ile <sup>591</sup> , Leu <sup>592</sup> , Met <sup>593</sup> , Thr <sup>594</sup> , Thr <sup>595</sup> , Val <sup>637</sup> , Arg <sup>639</sup> , Thr <sup>640</sup> , Arg <sup>642</sup> , Cys <sup>680</sup> , Pro <sup>681</sup>                                                                                 |
| 4UV8   | LSD1(KDM1A)-CoRest                                                        | Transcription                 | -10.1             | 39.3009297            | Gly <sup>330</sup> , Ala <sup>331</sup> , Val <sup>333</sup> , Thr <sup>335</sup> , Phe <sup>538</sup> , Ala <sup>539</sup> , Asn <sup>540</sup> , Trp <sup>552</sup> , Asp <sup>553</sup> , Gln <sup>554</sup> , Asp <sup>555</sup> , Asp <sup>556</sup> , Glu <sup>559</sup> , His <sup>564</sup> , Leu <sup>559</sup> , Lys <sup>561</sup> , Ser <sup>760</sup> , Tyr <sup>761</sup> , Ser <sup>762</sup> , Tyr <sup>763</sup> , Val <sup>764</sup> , Tyr <sup>773</sup> , Tyr <sup>807</sup> , Pro <sup>808</sup> , Ala <sup>809</sup> , Thr <sup>810</sup> , His <sup>812</sup>                                                            |
| 2CF9   | Recombinant human thrombin                                                | Hydrolase/hydrolase inhibitor | -9.94             | 51.8341992            | Arg <sup>35</sup> , Glu <sup>39</sup> , Leu <sup>40</sup> , Leu <sup>41</sup> , Cys <sup>42</sup> , His <sup>57</sup> , Cys <sup>58</sup> , Trp <sup>60</sup> , d, Lys <sup>60</sup> , Phe <sup>60</sup> , h, Asp <sup>189</sup> , Ala <sup>190</sup> , Cys <sup>191</sup> , Glu <sup>192</sup> , Ser <sup>195</sup> , Val <sup>213</sup> , Ser <sup>214</sup> , Trp <sup>215</sup> , Gly <sup>215</sup> , Gly <sup>219</sup> , Cys <sup>220</sup> , Gly <sup>226</sup> , Phe <sup>227</sup> , Tyr <sup>228</sup>                                                                                                                               |
| 2FM5   | PDE4D2                                                                    | Hydrolase                     | -9.88             | 57.0686953            | Tyr <sup>159</sup> , His <sup>160</sup> , His <sup>164</sup> , His <sup>204</sup> , Ser <sup>208</sup> , Asn <sup>209</sup> , Gln <sup>210</sup> , Leu <sup>229</sup> , Gly <sup>230</sup> , Thr <sup>271</sup> , Asp <sup>272</sup> , Met <sup>273</sup> , Ser <sup>274</sup> , Asp <sup>318</sup> , Leu <sup>319</sup> , Asn <sup>321</sup> , Pro <sup>322</sup> , Tyr <sup>329</sup> , Trp <sup>332</sup> , Ile <sup>336</sup> , Phe <sup>340</sup> , Gln <sup>343</sup> , Ser <sup>355</sup> , Pro <sup>356</sup> , Met <sup>357</sup> , Cys <sup>358</sup> , Gln <sup>369</sup> , Phe <sup>372</sup>                                       |
| 6FFI   | MGLUR5 in complex with MMPEP                                              | Membrane protein              | -9.77             | 68.7114375            | Leu <sup>635</sup> , Gln <sup>647</sup> , Arg <sup>648</sup> , Ile <sup>651</sup> , Gly <sup>652</sup> , Met <sup>880</sup> , Tyr <sup>890</sup> , Leu <sup>891</sup> , Ile <sup>892</sup> , Cys <sup>893</sup> , Asn <sup>894</sup> , Thr <sup>895</sup> , Thr <sup>896</sup> , Gly <sup>899</sup> , Val <sup>900</sup> , Pro <sup>903</sup> , Leu <sup>904</sup> , Tyr <sup>952</sup> , Asn <sup>956</sup> , Tyr <sup>957</sup> , Lys <sup>958</sup> , Ile <sup>959</sup> , Ile <sup>960</sup> , Met <sup>962</sup>                                                                                                                           |
| 4WB7   | Camp-dependent protein kinase a (catalytic alpha subunit)                 | Transferase                   | -9.46             | 116.7331172           | Lys <sup>2</sup> , Asp <sup>3</sup> , Tyr <sup>4</sup> , Thr <sup>7</sup> , Glu <sup>42</sup> , Lys <sup>43</sup> , Glu <sup>46</sup> , Glu <sup>49</sup> , Ala <sup>50</sup> , Phe <sup>336</sup> , Asn <sup>341</sup> , Asn <sup>348</sup> , His <sup>349</sup> , Lys <sup>350</sup> , Phe <sup>352</sup> , Ala <sup>353</sup>                                                                                                                                                                                                                                                                                                                |
| 5HEX   | Human hexokinase 2                                                        | Transferase                   | -9.36             | 136.8034375           | Asp <sup>84</sup> , Leu <sup>85</sup> , Gly <sup>86</sup> , Asn <sup>89</sup> , Phe <sup>90</sup> , Arg <sup>91</sup> , Ile <sup>111</sup> , Ser <sup>155</sup> , Phe <sup>156</sup> , Asp <sup>209</sup> , Ile <sup>229</sup> , Gly <sup>231</sup> , Thr <sup>232</sup> , Gly <sup>233</sup> , Ser <sup>234</sup> , Asn <sup>235</sup> , Glu <sup>260</sup> , Gly <sup>262</sup> , Glu <sup>294</sup> , Asp <sup>313</sup> , Gly <sup>314</sup> , Ser <sup>415</sup> , Ser <sup>445</sup> , Glu <sup>446</sup> , Asp <sup>447</sup> , Gly <sup>448</sup> , Ser <sup>449</sup>                                                                  |
| 4FAD   | PI3KA                                                                     | Transferase                   | -9.35             | 141.261625            | Trp <sup>201</sup> , Leu <sup>207</sup> , Pro <sup>208</sup> , Tyr <sup>210</sup> , Leu <sup>211</sup> , Arg <sup>277</sup> , Glu <sup>279</sup> , Gln <sup>291</sup> , Trp <sup>292</sup> , Arg <sup>294</sup> , His <sup>295</sup> , Lys <sup>298</sup> , Asn <sup>299</sup> , Asp <sup>788</sup> , Arg <sup>849</sup> , Glu <sup>852</sup> , Glu <sup>856</sup> , Leu <sup>865</sup> , Pro <sup>866</sup> , Tyr <sup>867</sup> , Glu <sup>880</sup>                                                                                                                                                                                          |
| 4U7D   | Human RECQ-like helicase                                                  | Hydrolase                     | -9.33             | 143.9087813           | Phe <sup>87</sup> , Lys <sup>88</sup> , Leu <sup>89</sup> , Arg <sup>93</sup> , Thr <sup>115</sup> , Gly <sup>116</sup> , Gly <sup>118</sup> , Lys <sup>119</sup> , Ser <sup>120</sup> , Leu <sup>121</sup> , Tyr <sup>123</sup> , Cys <sup>138</sup> , Leu <sup>143</sup> , Asp <sup>146</sup> , Gln <sup>147</sup> , Val <sup>150</sup> , Leu <sup>154</sup> , Asp <sup>219</sup> , Glu <sup>220</sup> , Leu <sup>253</sup> , Gly <sup>377</sup> , Ile <sup>378</sup> , Asp <sup>379</sup> , Arg <sup>407</sup>                                                                                                                               |
| 4NY0   | Human focal adhesion kinase                                               | Transferase                   | -9.23             | 171.2329219           | Arg <sup>36</sup> , Ser <sup>88</sup> , Val <sup>95</sup> , Arg <sup>125</sup> , Ile <sup>126</sup> , Arg <sup>127</sup> , Leu <sup>129</sup> , Phe <sup>147</sup> , Gln <sup>150</sup> , Asp <sup>154</sup> , Glu <sup>158</sup> , Tyr <sup>251</sup> , Arg <sup>252</sup> , Phe <sup>253</sup> , Lys <sup>255</sup> , Glu <sup>256</sup> , Cys <sup>257</sup> , Asn <sup>339</sup>                                                                                                                                                                                                                                                            |
| 4OJ2   | Aquaporin                                                                 | Transport protein             | -9.18             | 186.9406719           | His <sup>51</sup> , Ile <sup>62</sup> , Ser <sup>63</sup> , Gly <sup>64</sup> , His <sup>66</sup> , Cys <sup>75</sup> , Gly <sup>78</sup> , Cys <sup>79</sup> , His <sup>80</sup> , Val <sup>81</sup> , Arg <sup>85</sup> , Tyr <sup>89</sup> , Ile <sup>145</sup> , Phe <sup>146</sup> , Thr <sup>149</sup> , Asp <sup>150</sup> , Glu <sup>151</sup> , Arg <sup>152</sup> , Tyr <sup>219</sup> , Asn <sup>220</sup> , Tyr <sup>221</sup> , Pro <sup>225</sup> , Ala <sup>227</sup>                                                                                                                                                            |
| 1OE9   | Myosin V motor                                                            | ATPASE/myosin                 | -9.15             | 195.9873594           | Thr <sup>112</sup> , Arg <sup>113</sup> , Phe <sup>251</sup> , Gln <sup>252</sup> , Ala <sup>253</sup> , Gly <sup>254</sup> , Glu <sup>256</sup> , Gln <sup>290</sup> , Gly <sup>291</sup> , Phe <sup>444</sup> , Glu <sup>445</sup> , Ile <sup>446</sup> , Ser <sup>448</sup> , Glu <sup>450</sup> , Gln <sup>451</sup> , Glu <sup>562</sup> , Gly <sup>563</sup> , Lys <sup>567</sup>                                                                                                                                                                                                                                                         |
| 4JXJ   | Ribosomal RNA small subunit methyltransferase a from rickettsia bellii    | Transferase                   | -9                | 252.4524063           | Asn <sup>23</sup> , Ile <sup>49</sup> , Gly <sup>50</sup> , Ile <sup>71</sup> , Glu <sup>72</sup> , Thr <sup>73</sup> , Asp <sup>74</sup> , Gln <sup>96</sup> , Asp <sup>97</sup> , Ala <sup>98</sup> , Leu <sup>99</sup> , Asn <sup>116</sup> , Leu <sup>117</sup> , Pro <sup>118</sup> , Tyr <sup>119</sup> , His <sup>120</sup> , Ile <sup>121</sup>                                                                                                                                                                                                                                                                                         |
| 5CSX   | The S156E mutant of human aquaporin 5                                     | Transport protein             | -8.87             | 314.9225625           | Ser <sup>64</sup> , Gly <sup>65</sup> , His <sup>67</sup> , Leu <sup>76</sup> , Asn <sup>80</sup> , Gln <sup>81</sup> , Ile <sup>82</sup> , Arg <sup>86</sup> , Tyr <sup>90</sup> , Ile <sup>146</sup> , Phe <sup>147</sup> , Thr <sup>150</sup> , Asp <sup>151</sup> , Ser <sup>152</sup> , Arg <sup>153</sup> , Phe <sup>222</sup> , Asn <sup>228</sup> , Ile <sup>238</sup> , Tyr <sup>243</sup> , Pro <sup>245</sup>                                                                                                                                                                                                                        |
| 5WGS   | Human GRK2                                                                | Transferase                   | -8.87             | 314.9225625           | Ile <sup>32</sup> , Leu <sup>33</sup> , Pro <sup>35</sup> , Asn <sup>179</sup> , Val <sup>180</sup> , Asn <sup>183</sup> , Ile <sup>184</sup> , His <sup>185</sup> , Leu <sup>186</sup> , Lys <sup>210</sup> , Asp <sup>212</sup> , Gly <sup>217</sup> , Trp <sup>276</sup> , Glu <sup>276</sup> , Arg <sup>617</sup> , Lys <sup>618</sup> , Gln <sup>633</sup> , Cys <sup>634</sup> , Asp <sup>635</sup> , Ser <sup>636</sup> , Asp <sup>637</sup> , Leu <sup>640</sup>                                                                                                                                                                        |
| 3R6I   | AKR1C3                                                                    | Oxidoreductase                | -8.86             | 319.2036563           | Tyr <sup>24</sup> , Pro <sup>26</sup> , Pro <sup>27</sup> , Leu <sup>54</sup> , Tyr <sup>55</sup> , Asn <sup>56</sup> , Trp <sup>86</sup> , His <sup>117</sup> , Ser <sup>118</sup> , Met <sup>120</sup> , Leu <sup>122</sup> , Asn <sup>167</sup> , Tyr <sup>216</sup> , Arg <sup>226</sup> , Trp <sup>227</sup> , Phe <sup>306</sup> , Phe <sup>311</sup> , Pro <sup>318</sup>                                                                                                                                                                                                                                                                |
| 2QFZ   | Human tbc1 domain family member 22a                                       | Hydrolase activator           | -8.77             | 374.7173438           | Ser <sup>36</sup> , Phe <sup>329</sup> , Cys <sup>366</sup> , Lys <sup>369</sup> , Leu <sup>370</sup> , Asp <sup>372</sup> , Gly <sup>373</sup> , Ile <sup>374</sup> , Gln <sup>375</sup> , Asp <sup>376</sup> , Asn <sup>377</sup> , Gly <sup>384</sup> , Met <sup>387</sup> , Lys <sup>388</sup> , Trp <sup>439</sup> , Tyr <sup>442</sup> , Gln <sup>443</sup> , Glu <sup>445</sup> , Pro <sup>446</sup> , Asp <sup>447</sup> , Gly <sup>448</sup> , Phe <sup>449</sup> , Ser <sup>450</sup>                                                                                                                                                 |
| 4KTV   | MAT enzymes: MATA2B                                                       | Transferase                   | -8.74             | 389.5498125           | Glu <sup>27</sup> , Gln <sup>36</sup> , Asp <sup>43</sup> , His <sup>89</sup> , Glu <sup>148</sup> , Val <sup>155</sup> , His <sup>158</sup> , Lys <sup>159</sup> , Ala <sup>162</sup> , Glu <sup>166</sup> , Gln <sup>372</sup> , Arg <sup>373</sup> , Ala <sup>376</sup> , Tyr <sup>377</sup> , Gly <sup>378</sup> , Phe <sup>380</sup> , Gly <sup>381</sup> , Arg <sup>382</sup>                                                                                                                                                                                                                                                             |
| 4MWS   | Human PPCA (trigonal crystal form 1)                                      | Hydrolase                     | -8.71             | 411.8625938           | Leu <sup>67</sup> , Thr <sup>68</sup> , Leu <sup>74</sup> , Val <sup>75</sup> , Gln <sup>76</sup> , Asn <sup>245</sup> , Tyr <sup>247</sup> , Asn <sup>248</sup> , Ala <sup>251</sup> , Pro <sup>252</sup> , Ala <sup>254</sup> , Cys <sup>303</sup> , Thr <sup>304</sup> , Asn <sup>305</sup> , Ala <sup>308</sup> , Met <sup>430</sup> , Thr <sup>433</sup> , Asp <sup>434</sup> , Lys <sup>435</sup> , Pro <sup>436</sup> , Leu <sup>437</sup>                                                                                                                                                                                               |
| 4JKJ   | The S18Y variant of ubiquitin carboxy-terminal hydrolase 11               | Hydrolase                     | -8.7              | 419.5806563           | Glu <sup>7</sup> , Asn <sup>9</sup> , Pro <sup>10</sup> , Glu <sup>11</sup> , Asn <sup>14</sup> , Leu <sup>17</sup> , Tyr <sup>18</sup> , Val <sup>22</sup> , Ala <sup>23</sup> , Gly <sup>24</sup> , Trp <sup>26</sup> , Arg <sup>27</sup> , Val <sup>29</sup> , Asp <sup>30</sup> , Glu <sup>109</sup>                                                                                                                                                                                                                                                                                                                                        |
| 5FN3   | Gamma secretase in class 1 of the apo- state ensemble                     | Hydrolase                     | -8.69             | 430.338875            | Leu <sup>260</sup> , Lys <sup>261</sup> , Pro <sup>262</sup> , Glu <sup>310</sup> , Gln <sup>313</sup> , Lys <sup>314</sup> , Ala <sup>315</sup> , Pro <sup>316</sup> , Val <sup>318</sup> , Thr <sup>517</sup> , Arg <sup>520</sup> , Trp <sup>533</sup> , Asn <sup>573</sup> , Leu <sup>574</sup> , Thr <sup>575</sup> , Gly <sup>576</sup> , Thr <sup>577</sup> , Val <sup>578</sup> , Tyr <sup>600</sup> , Arg <sup>622</sup> , Ser <sup>623</sup> , Thr <sup>624</sup>                                                                                                                                                                     |
| 6DK3   | Human mitochondrial serine hydrolase 2                                    | Transferase                   | -8.66             | 448.88575             | Gly <sup>99</sup> , Asp <sup>113</sup> , Glu <sup>116</sup> , Leu <sup>117</sup> , Gln <sup>120</sup> , Arg <sup>121</sup> , Leu <sup>124</sup> , Glu <sup>125</sup> , Pro <sup>131</sup> , Gly <sup>135</sup> , Val <sup>136</sup> , Gln <sup>139</sup> , Tyr <sup>292</sup> , Lys <sup>294</sup> , Glu <sup>312</sup> , Asn <sup>316</sup>                                                                                                                                                                                                                                                                                                    |
| 5HZJ   | Intersectin1 containing wildtype LOV2 domain                              | Signaling protein             | -8.58             | 512.912875            | Gln <sup>1470</sup> , Leu <sup>1588</sup> , Ser <sup>1589</sup> , Glu <sup>1590</sup> , Gln <sup>1591</sup> , Leu <sup>1592</sup> , Val <sup>1593</sup> , Ser <sup>1596</sup> , Val <sup>1597</sup> , Thr <sup>1598</sup> , Asn <sup>1599</sup> , Arg <sup>1604</sup> , Phe <sup>1629</sup> , Thr <sup>1661</sup> , Pro <sup>1662</sup> , Phe <sup>1664</sup> , Asn <sup>1666</sup> , Glu <sup>1667</sup> , His <sup>1687</sup>                                                                                                                                                                                                                 |
| 1W6K   | Human OSC                                                                 | Isomerase                     | -8.54             | 552.453875            | Asp <sup>220</sup> , Trp <sup>221</sup> , Ser <sup>227</sup> , Thr <sup>228</sup> , Tyr <sup>430</sup> , Gln <sup>431</sup> , Lys <sup>432</sup> , Tyr <sup>434</sup> , Arg <sup>435</sup> , Gln <sup>436</sup> , Met <sup>437</sup> , Asn <sup>492</sup> , Met <sup>493</sup> , Arg <sup>494</sup> , Asn <sup>495</sup> , Pro <sup>496</sup> , Thr <sup>505</sup> , Lys <sup>506</sup> , Arg <sup>507</sup>                                                                                                                                                                                                                                    |
| 4ZWJ   | Rhodopsin bound to arrestin                                               | Signaling protein             | -8.47             | 614.4345625           | Lys <sup>56</sup> , Lys <sup>67</sup> , Arg <sup>69</sup> , Thr <sup>70</sup> , Pro <sup>71</sup> , Tyr <sup>74</sup> , Gly <sup>149</sup> , Glu <sup>150</sup> , Asn <sup>151</sup> , His <sup>152</sup> , Arg <sup>206</sup> , Gln <sup>2070</sup> , Glu <sup>2071</sup> , Asp <sup>2072</sup> , Gln <sup>2138</sup> , Asp <sup>2139</sup> , Val <sup>2140</sup> , Gly <sup>2141</sup> , Lys <sup>2142</sup> , Arg <sup>2292</sup>                                                                                                                                                                                                            |
| 3HRZ   | Human factor B                                                            | Immune system                 | -8.46             | 624.893125            | Arg <sup>12</sup> , Glu <sup>16</sup> , Glu <sup>17</sup> , Gln <sup>18</sup> , Thr <sup>62</sup> , Thr <sup>64</sup> , Ser <sup>104</sup> , Phe <sup>105</sup> , Met <sup>128</sup> , Asp <sup>129</sup> , Asn <sup>463</sup> , Lys <sup>464</sup> , Lys <sup>466</sup> , Ile <sup>467</sup> , Phe <sup>468</sup> , Asp <sup>491</sup> , Met <sup>523</sup>                                                                                                                                                                                                                                                                                    |
| 5W45   | APOBEC3H                                                                  | DNA binding protein           | -8.42             | 675.3426875           | Leu <sup>11</sup> , Gln <sup>12</sup> , Asn <sup>14</sup> , Lys <sup>16</sup> , Arg <sup>17</sup> , Arg <sup>18</sup> , Leu <sup>19</sup> , Arg <sup>20</sup> , Pro <sup>22</sup> , Tyr <sup>23</sup> , Tyr <sup>24</sup> , Pro <sup>25</sup> , Arg <sup>26</sup> , Lys <sup>27</sup> , Thr <sup>81</sup> , Trp <sup>82</sup> , Arg <sup>110</sup>                                                                                                                                                                                                                                                                                              |
| 3EHT   | The extracellular domain of human corticotropin releasing factor receptor | Membrane protein              | -8.36             | 749.84375             | His <sup>285</sup> , Asp <sup>254</sup> , Ala <sup>253</sup> , Arg <sup>251</sup> , Tyr <sup>250</sup> , Asn <sup>249</sup> , Gly <sup>248</sup> , Tyr <sup>178</sup> , Tyr <sup>173</sup> , Ile <sup>171</sup> , Glu <sup>211</sup> , Ile <sup>20</sup> , Met <sup>19</sup> , Pro <sup>18</sup> , Asn <sup>17</sup> , Ile <sup>16</sup> , Pro <sup>15</sup> , Gln <sup>14</sup>                                                                                                                                                                                                                                                                |
| 2V5Y   | The receptor protein tyrosine phosphatase mu ectodomain                   | Hydrolase                     | -8.34             | 775.5878125           | Cys <sup>400</sup> , Tyr <sup>401</sup> , Gln <sup>402</sup> , Val <sup>403</sup> , Gly <sup>404</sup> , Glu <sup>407</sup> , Ser <sup>430</sup> , Pro <sup>431</sup> , Tyr <sup>432</sup> , Thr <sup>433</sup> , Asn <sup>434</sup> , Gly <sup>485</sup> , Gln <sup>488</sup> , Thr <sup>489</sup> , Tyr <sup>490</sup> , Gly <sup>491</sup> , Val <sup>492</sup> , Ile <sup>493</sup>                                                                                                                                                                                                                                                         |
| 3VJ9   | The human squalene synthase                                               | Transferase                   | -8.24             | 918.18875             | Glu <sup>165</sup> , Asp <sup>169</sup> , Glu <sup>202</sup> , Asn <sup>203</sup> , Ser <sup>206</sup> , Leu <sup>209</sup> , Lys <sup>213</sup> , Arg <sup>238</sup> , Tyr <sup>239</sup> , Glu <sup>261</sup> , Thr <sup>264</sup> , Asn <sup>265</sup> , His <sup>268</sup> , His <sup>269</sup> , Asp <sup>272</sup> , Pro <sup>354</sup> , Ser <sup>355</sup> , Lys <sup>358</sup>                                                                                                                                                                                                                                                         |

| PDB ID | Targets                                                                     | Classification               | Energy (kcal/mol) | Dissoc. constant [nM] | Contacting receptor residues                                                                                                                                                                                                                                                                                                                                                                                                                                                |
|--------|-----------------------------------------------------------------------------|------------------------------|-------------------|-----------------------|-----------------------------------------------------------------------------------------------------------------------------------------------------------------------------------------------------------------------------------------------------------------------------------------------------------------------------------------------------------------------------------------------------------------------------------------------------------------------------|
| 5T40   | Human EXOG (hexog)                                                          | Hydrolase                    | -8.23             | 935.3950625           | Asp <sup>108</sup> , Arg <sup>109</sup> , Lys <sup>110</sup> , Cys <sup>112</sup> , Phe <sup>114</sup> , Ser <sup>137</sup> , Arg <sup>138</sup> , His <sup>140</sup> , Pro <sup>143</sup> , Ala <sup>144</sup> , Gly <sup>145</sup> , Phe <sup>158</sup> , Phe <sup>168</sup> , Asn <sup>176</sup> , Glu <sup>179</sup> , Arg <sup>183</sup> , Arg <sup>314</sup>                                                                                                          |
| 5U2P   | Citrate synthase                                                            | Transferase                  | -8.21             | 952.9238125           | Met <sup>72</sup> , Arg <sup>73</sup> , Gly <sup>74</sup> , Met <sup>75</sup> , Gly <sup>77</sup> , Leu <sup>78</sup> , His <sup>265</sup> , Gly <sup>268</sup> , Asn <sup>269</sup> , Val <sup>270</sup> , His <sup>273</sup> , Leu <sup>300</sup> , His <sup>301</sup> , Gly <sup>348</sup> , Val <sup>349</sup> , Arg <sup>356</sup> , Asn <sup>400</sup> , Val <sup>401</sup> , Asp <sup>402</sup> , Arg <sup>428</sup> , Glu <sup>447</sup>                            |
| 3MWE   | Truncated human ATP-citrate lyase                                           | Transferase                  | -8.21             | 962.623               | Ser <sup>7</sup> , Asp <sup>60</sup> , Glu <sup>61</sup> , Gly <sup>100</sup> , Asn <sup>104</sup> , Glu <sup>237</sup> , Pro <sup>239</sup> , Pro <sup>240</sup> , Pro <sup>241</sup> , Phe <sup>242</sup> , Gly <sup>243</sup> , Arg <sup>244</sup> , Glu <sup>245</sup> , Ala <sup>246</sup> , Glu <sup>250</sup> , Ala <sup>251</sup> , Ala <sup>254</sup>                                                                                                              |
| 2XMS   | Human NDRG2 protein                                                         | Signaling protein            | -8.18             | 1002.417063           | Asp <sup>158</sup> , Lys <sup>162</sup> , His <sup>170</sup> , Thr <sup>173</sup> , Ser <sup>177</sup> , Gly <sup>181</sup> , Met <sup>182</sup> , Gly <sup>185</sup> , His <sup>186</sup> , Ser <sup>189</sup> , Gln <sup>190</sup> , Leu <sup>193</sup> , Trp <sup>220</sup> , Tyr <sup>223</sup> , Asn <sup>224</sup> , Arg <sup>226</sup> , Pro <sup>252</sup> , His <sup>253</sup> , Asp <sup>255</sup> , Ala <sup>256</sup>                                           |
| 5K10   | Isocitrate dehydrogenase (IDH1)                                             | Oxidoreductase               | -8.11             | 1143.465875           | Pro <sup>206</sup> , Tyr <sup>208</sup> , Tyr <sup>231</sup> , Lys <sup>236</sup> , Phe <sup>239</sup> , Glu <sup>240</sup> , Lys <sup>243</sup> , Ile <sup>244</sup> , Trp <sup>245</sup> , Glu <sup>247</sup> , Arg <sup>249</sup> , Gln <sup>257</sup> , Ser <sup>261</sup> , Glu <sup>262</sup> , Gly <sup>263</sup> , Gly <sup>264</sup> , Phe <sup>265</sup>                                                                                                          |
| 2J0S   | Exon junction                                                               | Hydrolase                    | -8.09             | 1172.784875           | Pro <sup>114</sup> , Thr <sup>115</sup> , Arg <sup>116</sup> , Gly <sup>142</sup> , Thr <sup>163</sup> , Pro <sup>164</sup> , Gly <sup>165</sup> , Arg <sup>166</sup> , Phe <sup>197</sup> , Gln <sup>200</sup> , Asn <sup>285</sup> , Thr <sup>286</sup> , Lys <sup>287</sup> , Gly <sup>309</sup> , Asp <sup>310</sup> , Arg <sup>316</sup> , Thr <sup>334</sup> , Asp <sup>335</sup> , Val <sup>336</sup>                                                                |
| 3PUF   | Human RNase H2 complex                                                      | Hydrolase                    | -8.08             | 1186.72325            | Glu <sup>73</sup> , Arg <sup>186</sup> , Asp <sup>187</sup> , Val <sup>190</sup> , Lys <sup>191</sup> , Trp <sup>193</sup> , Gln <sup>194</sup> , Phe <sup>195</sup> , Glu <sup>197</sup> , Lys <sup>198</sup> , Leu <sup>199</sup> , Gln <sup>200</sup> , Thr <sup>204</sup> , Tyr <sup>206</sup> , Gly <sup>207</sup> , Ser <sup>208</sup> , Trp <sup>219</sup> , Phe <sup>233</sup>                                                                                      |
| 3DOF   | Complex of ARL2 and BART                                                    | Signaling protein/hydrolase  | -8.06             | 1233.697375           | Lys <sup>5</sup> , Gln <sup>12</sup> , Glu <sup>42</sup> , Ser <sup>83</sup> , Thr <sup>84</sup> , Asp <sup>85</sup> , Arg <sup>114</sup> , Leu <sup>115</sup> , Ala <sup>116</sup> , Gly <sup>117</sup> , Ala <sup>118</sup> , Ile <sup>176</sup> , Arg <sup>179</sup> , Ile <sup>180</sup> , Thr <sup>182</sup> , Ala <sup>183</sup> , Glu <sup>186</sup> , His <sup>187</sup>                                                                                            |
| 3BYI   | Human rho GTPase activating protein 15 (arhgap15)                           | Signaling protein            | -8.04             | 1278.209              | Ile <sup>278</sup> , Arg <sup>289</sup> , Glu <sup>290</sup> , Trp <sup>296</sup> , Phe <sup>297</sup> , Gln <sup>300</sup> , Glu <sup>303</sup> , Ala <sup>304</sup> , Val <sup>332</sup> , Glu <sup>335</sup> , Glu <sup>336</sup> , Lys <sup>337</sup> , Leu <sup>338</sup> , Asn <sup>339</sup> , Leu <sup>340</sup> , Asp <sup>341</sup>                                                                                                                               |
| 1IKN   | IKAPBAPALPHA/NF-KAPPA B complex                                             | Transcription factor         | -8.04             | 1289.0415             | Lys <sup>28</sup> , Glu <sup>49</sup> , Arg <sup>50</sup> , Ser <sup>51</sup> , Thr <sup>52</sup> , Glu <sup>222</sup> , Asp <sup>223</sup> , Ile <sup>224</sup> , Glu <sup>225</sup> , Val <sup>226</sup> , Glu <sup>234</sup> , Ala <sup>235</sup> , Arg <sup>236</sup> , Gly <sup>237</sup> , Ser <sup>238</sup> , Phe <sup>239</sup> , Pro <sup>275</sup>                                                                                                               |
| 3EHI   | Human thymidylate synthase M190K                                            | Transferase                  | -8.01             | 1337.806              | Arg <sup>50</sup> , Thr <sup>51</sup> , Glu <sup>87</sup> , Phe <sup>91</sup> , Asp <sup>116</sup> , Tyr <sup>135</sup> , Asn <sup>183</sup> , Pro <sup>184</sup> , His <sup>196</sup> , Gln <sup>214</sup> , Ser <sup>216</sup> , Gly <sup>217</sup> , Asp <sup>218</sup> , Gly <sup>222</sup> , Phe <sup>225</sup> , Asn <sup>226</sup> , His <sup>256</sup> , Tyr <sup>258</sup>                                                                                         |
| 6F39   | C1R homodimer CUB1-EGF-CUB2                                                 | Hydrolase                    | -7.98             | 1421.61325            | Thr <sup>35</sup> , Gly <sup>36</sup> , Tyr <sup>37</sup> , Arg <sup>38</sup> , Ser <sup>62</sup> , Lys <sup>66</sup> , Leu <sup>68</sup> , Met <sup>89</sup> , Ser <sup>90</sup> , Gln <sup>91</sup> , Gly <sup>92</sup> , Asn <sup>93</sup> , Lys <sup>94</sup> , Met <sup>95</sup> , Asp <sup>125</sup> , Leu <sup>126</sup> , Glu <sup>128</sup> , Tyr <sup>155</sup>                                                                                                   |
| 5AIU   | RNF4-ring domain, UBC13-UB (isopeptide crosslink)                           | Ligase/signaling protein     | -7.97             | 1440.938875           | Tyr <sup>143</sup> , Val <sup>147</sup> , Gly <sup>150</sup> , Arg <sup>151</sup> , Leu <sup>152</sup> , Ile <sup>153</sup> , Ile <sup>192</sup> , Tyr <sup>193</sup> , Ile <sup>194</sup> , Gly <sup>195</sup> , Ser <sup>196</sup> , Val <sup>199</sup> , Ser <sup>200</sup> , Cys <sup>201</sup> , Pro <sup>202</sup> , His <sup>225</sup> , Val <sup>226</sup> , Thr <sup>244</sup>                                                                                     |
| 2UW9   | PKB-Beta (AKT2)                                                             | Transferase                  | -7.96             | 1455.60525            | Ala <sup>82</sup> , Gly <sup>83</sup> , Lys <sup>86</sup> , Lys <sup>390</sup> , Gln <sup>391</sup> , Arg <sup>392</sup> , Leu <sup>393</sup> , Gly <sup>394</sup> , Gly <sup>395</sup> , Gly <sup>396</sup> , Pro <sup>397</sup> , Ser <sup>398</sup> , Glu <sup>402</sup> , Glu <sup>405</sup> , His <sup>406</sup> , Arg <sup>407</sup>                                                                                                                                  |
| 3GR4   | Human pyruvate kinase M2                                                    | Transferase                  | -7.96             | 1460.527125           | Arg <sup>255</sup> , Asn <sup>264</sup> , Ile <sup>265</sup> , Lys <sup>266</sup> , Ile <sup>267</sup> , Glu <sup>285</sup> , Ala <sup>286</sup> , Ser <sup>287</sup> , Asp <sup>288</sup> , Gly <sup>321</sup> , Lys <sup>322</sup> , Pro <sup>323</sup> , Lys <sup>333</sup> , Ser <sup>434</sup> , Arg <sup>436</sup> , His <sup>439</sup> , Arg <sup>443</sup> , Asn <sup>456</sup> , Gln <sup>457</sup> , Tyr <sup>466</sup> , Ser <sup>519</sup>                      |
| 3OE9   | the chemokine CXCR4 receptor                                                | Signaling protein, hydrolase | -7.91             | 1581.106375           | Asp <sup>1010</sup> , Glu <sup>1011</sup> , Arg <sup>1014</sup> , Tyr <sup>1018</sup> , Lys <sup>1019</sup> , Tyr <sup>1024</sup> , Thr <sup>1026</sup> , Gly <sup>1030</sup> , His <sup>1031</sup> , Leu <sup>1032</sup> , Asp <sup>1070</sup> , Ala <sup>1074</sup> , Val <sup>1103</sup> , Phe <sup>1104</sup> , Gln <sup>1105</sup> , Met <sup>1106</sup> , Gly <sup>1107</sup> , Trp <sup>1138</sup> , Gln <sup>1141</sup> , Thr <sup>1142</sup> , Arg <sup>1145</sup> |
| 4URW   | RAS:SOS complex                                                             | Signaling protein            | -7.91             | 1594.505875           | Ser <sup>17</sup> , Ile <sup>21</sup> , Tyr <sup>32</sup> , Pro <sup>34</sup> , Thr <sup>35</sup> , Ile <sup>36</sup> , Gly <sup>37</sup> , Tyr <sup>40</sup> , Arg <sup>41</sup> , Asp <sup>54</sup> , Ile <sup>55</sup> , Leu <sup>56</sup> , Asp <sup>57</sup> , Thr <sup>58</sup> , Ala <sup>59</sup> , Gln <sup>61</sup>                                                                                                                                               |
| 5POQ   | BRD1 in complex with N10974A                                                | Gene regulation              | -7.9              | 1610.735375           | Ile <sup>54</sup> , Phe <sup>55</sup> , Val <sup>59</sup> , Glu <sup>63</sup> , Val <sup>64</sup> , Pro <sup>65</sup> , Tyr <sup>67</sup> , Met <sup>75</sup> , Ile <sup>102</sup> , Asn <sup>105</sup> , Cys <sup>106</sup> , Tyr <sup>109</sup> , Asn <sup>110</sup> , Ala <sup>111</sup> , Thr <sup>114</sup> , Phe <sup>116</sup>                                                                                                                                       |
| 4ZMV   | Human P-cadherin (SS-X-dimer pocket I)                                      | Cell adhesion                | -7.82             | 1846.706875           | Ala <sup>147</sup> , Tyr <sup>148</sup> , Ser <sup>149</sup> , Ile <sup>150</sup> , His <sup>151</sup> , Ser <sup>152</sup> , Gln <sup>153</sup> , Lys <sup>156</sup> , Asp <sup>160</sup> , Leu <sup>161</sup> , Met <sup>162</sup> , Phe <sup>163</sup> , Thr <sup>164</sup> , Ile <sup>165</sup> , Arg <sup>167</sup> , Gln <sup>192</sup> , Gly <sup>198</sup> , Thr <sup>202</sup>                                                                                     |
| 2CZK   | Human myo-inositol mono-phosphatase 2 (impa2)                               | Hydrolase                    | -7.74             | 2113.67775            | Arg <sup>46</sup> , Gly <sup>47</sup> , Gly <sup>49</sup> , Arg <sup>56</sup> , Leu <sup>57</sup> , Arg <sup>58</sup> , Val <sup>159</sup> , Ser <sup>160</sup> , Gly <sup>161</sup> , Arg <sup>240</sup> , Glu <sup>241</sup> , Ala <sup>242</sup> , Gly <sup>243</sup> , Gly <sup>244</sup> , Ile <sup>245</sup> , Ser <sup>265</sup> , Thr <sup>266</sup> , Arg <sup>267</sup>                                                                                           |
| 3OHH   | Activated G alpha Q                                                         | Signaling protein            | -7.72             | 2197.34375            | Ser <sup>23</sup> , Ile <sup>56</sup> , Lys <sup>57</sup> , Arg <sup>60</sup> , Gly <sup>84</sup> , Ser <sup>65</sup> , Tyr <sup>87</sup> , Phe <sup>75</sup> , Leu <sup>78</sup> , Val <sup>184</sup> , Pro <sup>185</sup> , Thr <sup>186</sup> , Thr <sup>187</sup> , Ile <sup>190</sup> , Tyr <sup>192</sup> , Pro <sup>193</sup> , Phe <sup>194</sup> , Asp <sup>205</sup>                                                                                              |
| 5IOH   | Repoman-PP1A (protein phosphatase 1, alpha isoform) holoenzyme              | Hydrolase/protein binding    | -7.71             | 2219.709              | Arg <sup>96</sup> , Asn <sup>124</sup> , His <sup>125</sup> , Ile <sup>130</sup> , Tyr <sup>134</sup> , Trp <sup>206</sup> , Asp <sup>208</sup> , Pro <sup>209</sup> , Asp <sup>210</sup> , Lys <sup>211</sup> , Asn <sup>219</sup> , Asp <sup>220</sup> , Arg <sup>221</sup> , Thr <sup>226</sup> , Gln <sup>249</sup> , Val <sup>251</sup> , Glu <sup>256</sup> , Phe <sup>258</sup> , Phe <sup>276</sup>                                                                 |
| 5L6D   | The human METTL3-METTL14 complex                                            | Transferase                  | -7.69             | 2315.37475            | Tyr <sup>80</sup> , Leu <sup>81</sup> , Asp <sup>82</sup> , Ser <sup>84</sup> , Ile <sup>85</sup> , Arg <sup>564</sup> , Gln <sup>567</sup> , Arg <sup>568</sup> , Tyr <sup>569</sup> , Pro <sup>570</sup> , Asp <sup>571</sup> , Ile <sup>573</sup> , Ile <sup>574</sup> , Ser <sup>575</sup> , Lys <sup>576</sup>                                                                                                                                                         |
| 4IA0   | The PDE5A1 catalytic domain                                                 | Hydrolase                    | -7.67             | 2378.7535             | Leu <sup>554</sup> , Lys <sup>555</sup> , Asp <sup>558</sup> , Phe <sup>559</sup> , Ser <sup>560</sup> , Phe <sup>561</sup> , Ser <sup>562</sup> , Glu <sup>565</sup> , Leu <sup>566</sup> , Thr <sup>569</sup> , Lys <sup>770</sup> , Pro <sup>771</sup> , Trp <sup>772</sup> , Ile <sup>774</sup> , Pro <sup>841</sup> , Asp <sup>844</sup> , Gly <sup>845</sup> , Lys <sup>848</sup> , Asn <sup>849</sup> , Lys <sup>852</sup>                                           |
| 4GWG   | 6-phosphogluconate dehydrogenase apo-form                                   | Oxidoreductase               | -7.66             | 2443.86725            | Trp <sup>172</sup> , Arg <sup>142</sup> , Ala <sup>145</sup> , Thr <sup>346</sup> , Gly <sup>349</sup> , Trp <sup>350</sup> , Thr <sup>351</sup> , Leu <sup>352</sup> , Asn <sup>353</sup> , Tyr <sup>354</sup> , Gly <sup>355</sup> , Gly <sup>356</sup> , Lys <sup>376</sup> , Phe <sup>379</sup> , Arg <sup>380</sup> , Pro <sup>383</sup> , Gln <sup>386</sup>                                                                                                          |
| 4IRG   | The ETS transcription factor ERG                                            | DNA binding protein          | -7.65             | 2464.5785             | Gly <sup>292</sup> , Gln <sup>293</sup> , Gln <sup>295</sup> , Leu <sup>296</sup> , Trp <sup>334</sup> , Lys <sup>338</sup> , Lys <sup>340</sup> , Met <sup>343</sup> , Lys <sup>347</sup> , Leu <sup>348</sup> , Arg <sup>350</sup> , Ala <sup>351</sup> , Tyr <sup>354</sup> , Tyr <sup>355</sup> , Lys <sup>358</sup>                                                                                                                                                    |
| 3R4O   | Heat shock protein 90                                                       | Chaperone                    | -7.61             | 2632.2675             | Arg <sup>46</sup> , Glu <sup>47</sup> , Ser <sup>50</sup> , Asn <sup>51</sup> , Asp <sup>54</sup> , Ala <sup>55</sup> , Lys <sup>58</sup> , Asn <sup>106</sup> , Leu <sup>107</sup> , Lys <sup>112</sup> , Gly <sup>132</sup> , Gln <sup>133</sup> , Gly <sup>135</sup> , Val <sup>136</sup> , Gly <sup>137</sup> , Phe <sup>138</sup> , His <sup>210</sup> , Ser <sup>211</sup> , Gln <sup>212</sup> , Phe <sup>213</sup> , Ile <sup>214</sup>                             |
| 1ZXN   | Human topo IIA ATPase/AMP-PNP                                               | Isomerase                    | -7.58             | 2773.6605             | Gln <sup>59</sup> , Gln <sup>60</sup> , Met <sup>61</sup> , Trp <sup>62</sup> , Tyr <sup>72</sup> , Arg <sup>241</sup> , Lys <sup>306</sup> , Gly <sup>307</sup> , Phe <sup>308</sup> , Gln <sup>309</sup> , Gln <sup>310</sup> , Ile <sup>311</sup> , Ala <sup>318</sup> , Ser <sup>320</sup> , Lys <sup>321</sup> , Gly <sup>322</sup> , Gly <sup>323</sup> , Val <sup>326</sup>                                                                                          |
| 4E+49  | Carbonic anhydrase (CA)                                                     | Lyase                        | -7.57             | 2820.87225            | Tyr <sup>40</sup> , Asp <sup>41</sup> , Pro <sup>42</sup> , Leu <sup>44</sup> , Lys <sup>45</sup> , Pro <sup>46</sup> , Leu <sup>47</sup> , Ser <sup>48</sup> , Val <sup>49</sup> , Ser <sup>50</sup> , Lys <sup>80</sup> , Gly <sup>81</sup> , Gly <sup>82</sup> , Glu <sup>187</sup> , Ser <sup>188</sup> , Leu <sup>189</sup> , Asp <sup>190</sup> , Tyr <sup>191</sup> , Ser <sup>259</sup>                                                                             |
| 1JT3   | Human acidic fibroblast growth factor                                       | Hormone/growth factor        | -7.56             | 2888.32175            | Asp <sup>28</sup> , Gly <sup>29</sup> , Thr <sup>30</sup> , Val <sup>31</sup> , Asp <sup>32</sup> , Asp <sup>68</sup> , Thr <sup>69</sup> , Leu <sup>72</sup> , Val <sup>73</sup> , Tyr <sup>74</sup> , Gly <sup>75</sup> , Glu <sup>82</sup> , Ser <sup>116</sup> , Cys <sup>117</sup> , Lys <sup>118</sup> , Arg <sup>119</sup>                                                                                                                                           |
| 5HKJ   | Single chain recombinant globular head of the complement system protein C10 | Signaling protein            | -7.53             | 3048.61               | Asn <sup>20</sup> , Cys <sup>63</sup> , Leu <sup>64</sup> , Ser <sup>65</sup> , Arg <sup>76</sup> , Ser <sup>77</sup> , Leu <sup>78</sup> , Gly <sup>79</sup> , Phe <sup>80</sup> , Glu <sup>109</sup> , Lys <sup>110</sup> , Asp <sup>111</sup> , Pro <sup>112</sup> , Gln <sup>152</sup> , Gln <sup>256</sup> , Gly <sup>257</sup> , Asp <sup>259</sup>                                                                                                                   |
| 4NYH   | Pir1 dual specificity phosphatase core                                      | Hydrolase                    | -7.5              | 3158.60325            | His <sup>30</sup> , Ile <sup>31</sup> , Pro <sup>32</sup> , Glu <sup>33</sup> , Arg <sup>34</sup> , Trp <sup>35</sup> , Lys <sup>36</sup> , Asp <sup>37</sup> , Lys <sup>64</sup> , Leu <sup>65</sup> , Thr <sup>96</sup> , Gln <sup>97</sup> , Tyr <sup>99</sup> , Thr <sup>153</sup> , Arg <sup>158</sup>                                                                                                                                                                 |
| 3WO2   | Human interleukin-18                                                        | Immune system                | -7.5              | 3180                  | Gly <sup>25</sup> , Asn <sup>26</sup> , Arg <sup>27</sup> , Pro <sup>28</sup> , Glu <sup>77</sup> , Asn <sup>78</sup> , Lys <sup>79</sup> , Ile <sup>80</sup> , Ile <sup>81</sup> , Ser <sup>82</sup> , Phe <sup>83</sup> , Lys <sup>135</sup> , Leu <sup>136</sup> , Ile <sup>137</sup> , Leu <sup>138</sup>                                                                                                                                                               |
| 2G6P   | Truncated (delta 1-89) human methionine aminopeptidase type 1               | Hydrolase                    | -7.49             | 3234.128              | Gln <sup>113</sup> , Arg <sup>114</sup> , Pro <sup>115</sup> , Asp <sup>116</sup> , Ser <sup>127</sup> , Gly <sup>143</sup> , Asp <sup>144</sup> , Glu <sup>146</sup> , Gly <sup>147</sup> , Leu <sup>150</sup> , Tyr <sup>233</sup> , Asn <sup>235</sup> , Gly <sup>236</sup> , Tyr <sup>237</sup> , Lys <sup>307</sup> , Leu <sup>308</sup>                                                                                                                               |
| 5HOV   | H88A mutated human transthyretin                                            | Transport protein            | -7.48             | 3289.1775             | Pro <sup>11</sup> , Glu <sup>61</sup> , Phe <sup>64</sup> , Val <sup>65</sup> , Glu <sup>66</sup> , Ala <sup>97</sup> , Asn <sup>98</sup> , Asp <sup>99</sup> , Gly <sup>101</sup> , Pro <sup>102</sup> , Arg <sup>103</sup> , Arg <sup>104</sup> , Tyr <sup>105</sup> , Asn <sup>124</sup>                                                                                                                                                                                 |
| 2IYB   | Complex between the 3rd LIM domain of TES and the evh1 domain of MENA       | Metal-binding                | -7.43             | 3560.72775            | Val <sup>15</sup> , Tyr <sup>16</sup> , Asp <sup>17</sup> , Asp <sup>18</sup> , Ala <sup>19</sup> , Val <sup>24</sup> , Pro <sup>25</sup> , Ala <sup>26</sup> , Gly <sup>27</sup> , Gly <sup>28</sup> , Val <sup>59</sup> , Ile <sup>60</sup> , Asn <sup>61</sup> , Arg <sup>84</sup> , Gln <sup>85</sup> , Val <sup>86</sup> , Tyr <sup>87</sup>                                                                                                                           |
| 5Z90   | BRD4 bromodomain 1                                                          | Transcription                | -7.43             | 3560.72775            | Pro <sup>45</sup> , Pro <sup>46</sup> , Pro <sup>48</sup> , Glu <sup>49</sup> , Asn <sup>52</sup> , Lys <sup>55</sup> , Tyr <sup>98</sup> , Ile <sup>101</sup> , Lys <sup>102</sup> , Thr <sup>103</sup> , Pro <sup>104</sup> , Met <sup>105</sup> , Arg <sup>113</sup> , Tyr <sup>118</sup> , Asp <sup>128</sup> , Thr <sup>131</sup>                                                                                                                                      |

| PDB ID | Targets                                                                                    | Classification              | Energy (kcal/mol) | Dissoc. constant [nM] | Contacting receptor residues                                                                                                                                                                                                                                                                                                                                                                  |
|--------|--------------------------------------------------------------------------------------------|-----------------------------|-------------------|-----------------------|-----------------------------------------------------------------------------------------------------------------------------------------------------------------------------------------------------------------------------------------------------------------------------------------------------------------------------------------------------------------------------------------------|
| 1Z3U   | Angiopoietin-2 receptor binding domain                                                     | Signaling protein           | -7.4              | 3751.99325            | Arg <sup>328</sup> , Ser <sup>332</sup> , Val <sup>333</sup> , Asp <sup>334</sup> , Phe <sup>335</sup> , Gln <sup>336</sup> , Glu <sup>352</sup> , Gly <sup>457</sup> , Met <sup>458</sup> , Tyr <sup>459</sup> , Tyr <sup>460</sup> , Pro <sup>461</sup> , Gln <sup>464</sup> , Lys <sup>468</sup> , Asn <sup>470</sup>                                                                      |
| 5A2E   | Extracellular SRCR domains of human CD6                                                    | Immune system               | -7.4              | 3751.99325            | Asp <sup>291</sup> , Ser <sup>292</sup> , Trp <sup>294</sup> , Arg <sup>294</sup> , Pro <sup>315</sup> , Lys <sup>316</sup> , Gly <sup>317</sup> , Ser <sup>351</sup> , Gln <sup>352</sup> , Ser <sup>353</sup> , Leu <sup>354</sup> , Ala <sup>356</sup> , Arg <sup>357</sup>                                                                                                                |
| 4A7U   | Human I113TSOD1                                                                            | Oxidoreductase              | -7.39             | 3841.7065             | Gly <sup>73</sup> , Pro <sup>74</sup> , Lys <sup>75</sup> , Asp <sup>76</sup> , Gly <sup>85</sup> , Asn <sup>86</sup> , Val <sup>87</sup> , Thr <sup>88</sup> , Asp <sup>96</sup> , Val <sup>97</sup> , Ser <sup>98</sup> , Ile <sup>99</sup> , Glu <sup>100</sup> , Leu <sup>126</sup> , Lys <sup>128</sup>                                                                                  |
| 5F6D   | UBC9 (K48A/K49A/E54A)                                                                      | Ligase                      | -7.36             | 4020.82775            | Asp <sup>19</sup> , His <sup>20</sup> , Pro <sup>21</sup> , Phe <sup>22</sup> , Gly <sup>23</sup> , Phe <sup>24</sup> , Val <sup>25</sup> , Pro <sup>46</sup> , Gly <sup>47</sup> , Ala <sup>48</sup> , Ala <sup>49</sup> , Ala <sup>54</sup> , Gly <sup>55</sup> , Gly <sup>56</sup> , Leu <sup>57</sup> , Lys <sup>110</sup> , Leu <sup>114</sup> , Gln <sup>117</sup> , Pro <sup>157</sup> |
| 4IP9   | Human serum amyloid A1                                                                     | Protein binding             | -7.34             | 4172.9355             | Ala <sup>14</sup> , Arg <sup>15</sup> , Met <sup>17</sup> , Trp <sup>18</sup> , Tyr <sup>21</sup> , Ile <sup>58</sup> , Arg <sup>62</sup> , Ile <sup>65</sup> , Gln <sup>66</sup> , Phe <sup>69</sup> , Gly <sup>70</sup> , His <sup>71</sup>                                                                                                                                                 |
| 2X1X   | Structure of VEGF-C in complex with domains 2 and 3 of VEGFR2 in a tetrameric crystal form | Hormone/signaling protein   | -7.29             | 4571.1365             | Trp <sup>126</sup> , Arg <sup>130</sup> , Cys <sup>131</sup> , Met <sup>132</sup> , Pro <sup>133</sup> , Cys <sup>165</sup> , Cys <sup>166</sup> , Asn <sup>167</sup> , Ser <sup>168</sup> , Leu <sup>171</sup> , Thr <sup>207</sup> , Ser <sup>208</sup> , Cys <sup>209</sup> , Arg <sup>210</sup> , Cys <sup>211</sup> , Met <sup>212</sup>                                                 |
| 4MXV   | Lymphotoxin alpha                                                                          | Cytokine/immune system      | -7.25             | 4849.3055             | Asn <sup>41</sup> , Ser <sup>42</sup> , Leu <sup>43</sup> , Leu <sup>44</sup> , Trp <sup>45</sup> , Asn <sup>62</sup> , Asn <sup>63</sup> , Ser <sup>64</sup> , Tyr <sup>96</sup> , Gln <sup>102</sup> , His <sup>111</sup> , Ser <sup>148</sup> , Thr <sup>149</sup> , His <sup>150</sup> , Thr <sup>151</sup> , Asp <sup>152</sup> , Gly <sup>153</sup> , Ile <sup>154</sup>                |
| 5OKF   | Human 14-3-3 sigma with the hspb6 phosphopeptide                                           | Signaling protein           | -7.22             | 5075.406              | Trp <sup>59</sup> , Arg <sup>60</sup> , Ser <sup>63</sup> , Ser <sup>64</sup> , Glu <sup>66</sup> , Gln <sup>67</sup> , Arg <sup>85</sup> , Ala <sup>132</sup> , Glu <sup>133</sup> , Val <sup>134</sup> , Ala <sup>135</sup> , Lys <sup>140</sup> , Tyr <sup>181</sup> , Phe <sup>182</sup> , Ile <sup>183</sup> , Arg <sup>238</sup>                                                        |
| 5GNT   | BDLP-like folding of Mitofusin 1                                                           | Hydrolase                   | -7.21             | 5231.9665             | Leu <sup>197</sup> , Ala <sup>199</sup> , Asp <sup>200</sup> , Val <sup>201</sup> , Phe <sup>202</sup> , Leu <sup>227</sup> , Ser <sup>228</sup> , Lys <sup>229</sup> , Pro <sup>230</sup> , Asn <sup>231</sup> , Ser <sup>331</sup> , Thr <sup>334</sup> , Thr <sup>335</sup> , Lys <sup>336</sup> , Gln <sup>339</sup>                                                                      |
| 2QX4   | Quinone reductase ii                                                                       | Oxidoreductase              | -7.17             | 5522.3165             | Ala <sup>152</sup> , Glu <sup>153</sup> , Tyr <sup>155</sup> , Thr <sup>156</sup> , Asp <sup>163</sup> , Ser <sup>164</sup> , Arg <sup>165</sup> , Leu <sup>168</sup> , Ala <sup>185</sup> , Pro <sup>186</sup> , Gln <sup>187</sup> , Ile <sup>188</sup> , Phe <sup>190</sup> , Met <sup>203</sup> , Ala <sup>206</sup> , Arg <sup>210</sup>                                                 |
| 2Q7N   | LIF receptor (domains 1-5)                                                                 | CYTOKINE receptor/CYTOKINE  | -7.15             | 5740.907              | Thr <sup>11</sup> , Thr <sup>12</sup> , Asn <sup>13</sup> , Asn <sup>14</sup> , Arg <sup>16</sup> , Val <sup>17</sup> , Trp <sup>18</sup> , Asp <sup>19</sup> , Pro <sup>47</sup> , Leu <sup>48</sup> , Glu <sup>49</sup> , Thr <sup>50</sup> , Asn <sup>52</sup> , Lys <sup>53</sup> , Lys <sup>54</sup> , Glu <sup>89</sup>                                                                 |
| 3ZR0   | Human MTH1                                                                                 | Hydrolase                   | -7.13             | 5917.996              | Arg <sup>31</sup> , Leu <sup>108</sup> , Asp <sup>109</sup> , Ile <sup>111</sup> , Pro <sup>112</sup> , Phe <sup>113</sup> , Lys <sup>114</sup> , Arg <sup>115</sup> , Met <sup>116</sup> , Trp <sup>117</sup> , Pro <sup>118</sup> , Ser <sup>121</sup> , Pro <sup>125</sup> , Leu <sup>128</sup> , Gln <sup>129</sup> , Asp <sup>143</sup>                                                  |
| 5U7Z   | Human acid ceramidase (ASAH1, aCDase)                                                      | Hydrolase                   | -7.11             | 6141.874              | Lys <sup>74</sup> , Val <sup>77</sup> , Asn <sup>78</sup> , Lys <sup>81</sup> , Met <sup>84</sup> , Gln <sup>95</sup> , Asp <sup>98</sup> , Ala <sup>120</sup> , Ala <sup>121</sup> , Val <sup>122</sup> , Asp <sup>124</sup> , Ile <sup>125</sup> , Pro <sup>126</sup> , Leu <sup>127</sup> , Gly <sup>128</sup> , Glu <sup>129</sup>                                                        |
| 3H91   | Human chromobox homolog 2 (CBX2)                                                           | Transcription               | -7.08             | 6428.241              | Glu <sup>9</sup> , Gln <sup>10</sup> , Val <sup>11</sup> , Phe <sup>12</sup> , Arg <sup>23</sup> , Lys <sup>26</sup> , Glu <sup>28</sup> , Trp <sup>33</sup> , Ser <sup>42</sup> , Trp <sup>43</sup> , Glu <sup>44</sup> , Pro <sup>45</sup> , Glu <sup>47</sup> , Asn <sup>48</sup> , Leu <sup>50</sup>                                                                                      |
| 3UVU   | Flap endonuclease 1 (FEN1)                                                                 | Protein binding/peptide     | -7.04             | 6900.4685             | Val <sup>215</sup> , Pro <sup>216</sup> , Asp <sup>217</sup> , Leu <sup>218</sup> , Ser <sup>219</sup> , Val <sup>257</sup> , Arg <sup>258</sup> , His <sup>261</sup> , His <sup>262</sup> , Asn <sup>263</sup> , Gln <sup>297</sup>                                                                                                                                                          |
| 1CWF   | Human cyclophilin A                                                                        | Isomerase/immunosuppressant | -7.04             | 6912.125              | Phe <sup>7</sup> , Leu <sup>39</sup> , Ser <sup>40</sup> , Thr <sup>41</sup> , Gly <sup>42</sup> , Gly <sup>45</sup> , Phe <sup>46</sup> , Gly <sup>47</sup> , Tyr <sup>48</sup> , Lys <sup>49</sup> , Gly <sup>50</sup> , Phe <sup>67</sup> , Thr <sup>68</sup> , His <sup>70</sup> , Lys <sup>76</sup> , Asp <sup>160</sup> , Cys <sup>161</sup> , Gly <sup>162</sup> , Gln <sup>163</sup>  |
| 4Y5O   | CCM2 HHD in complex with MEKK3 NPB1                                                        | Transferase                 | -7.03             | 7077.3995             | Leu <sup>299</sup> , Tyr <sup>302</sup> , Leu <sup>322</sup> , Tyr <sup>325</sup> , Arg <sup>326</sup> , Gly <sup>328</sup> , Ala <sup>329</sup> , Ser <sup>330</sup> , Glu <sup>353</sup> , Phe <sup>356</sup> , Ile <sup>357</sup> , Pro <sup>358</sup> , Glu <sup>359</sup> , Lys <sup>360</sup> , Asp <sup>361</sup>                                                                      |
| 5FUG   | A human YL1-H2A.Z-H2B complex                                                              | DNA binding protein         | -6.96             | 7964.9745             | Leu <sup>68</sup> , Asn <sup>71</sup> , Ala <sup>72</sup> , Ser <sup>73</sup> , Lys <sup>74</sup> , Asp <sup>75</sup> , Leu <sup>76</sup> , Lys <sup>77</sup> , Val <sup>78</sup> , Lys <sup>79</sup> , Arg <sup>80</sup> , His <sup>85</sup> , Leu <sup>88</sup> , Ala <sup>89</sup> , Gly <sup>92</sup>                                                                                     |
| 5D1M   | UBCH5B                                                                                     | Ligase                      | -6.91             | 8680.963              | Leu <sup>13</sup> , Ala <sup>14</sup> , Pro <sup>17</sup> , Gln <sup>20</sup> , Cys <sup>21</sup> , Ser <sup>22</sup> , Ala <sup>23</sup> , Gly <sup>24</sup> , Gln <sup>34</sup> , Ala <sup>35</sup> , Thr <sup>36</sup> , Met <sup>38</sup> , Val <sup>49</sup> , Phe <sup>51</sup>                                                                                                         |
| 5VZ3   | Growth factor                                                                              | Signaling protein           | -6.78             | 10738.092             | Asp <sup>5</sup> , Arg <sup>16</sup> , Leu <sup>17</sup> , Gln <sup>51</sup> , Phe <sup>52</sup> , Arg <sup>53</sup> , Ala <sup>54</sup> , Gln <sup>60</sup> , Lys <sup>107</sup> , Asp <sup>108</sup> , Cys <sup>109</sup> , His <sup>110</sup>                                                                                                                                              |
| 6PAX   | Human PAX-6 paired domain-DNA complex                                                      | Gene regulation             | -6.71             | 12003.441             | Pro <sup>73</sup> , Arg <sup>74</sup> , Val <sup>75</sup> , Ala <sup>76</sup> , Pro <sup>78</sup> , Val <sup>81</sup> , Ser <sup>119</sup> , Arg <sup>122</sup> , Val <sup>123</sup> , Asn <sup>126</sup>                                                                                                                                                                                     |
| 1HF0   | DNA-binding domain of OCT-1                                                                | Transcription               | -6.6              | 14501.163             | Glu <sup>109</sup> , Asn <sup>111</sup> , Ile <sup>112</sup> , Val <sup>114</sup> , Ala <sup>115</sup> , Lys <sup>118</sup> , Ser <sup>119</sup> , Glu <sup>122</sup> , Ile <sup>134</sup> , Gln <sup>137</sup> , Leu <sup>138</sup> , Asn <sup>139</sup>                                                                                                                                     |
| 1QE6   | Interleukin-8                                                                              | Immune system               | -6.55             | 15698.361             | Leu <sup>25</sup> , Val <sup>27</sup> , Glu <sup>29</sup> , Ser <sup>30</sup> , Ala <sup>35</sup> , Asn <sup>36</sup> , Thr <sup>37</sup> , Ile <sup>39</sup> , Pro <sup>53</sup> , Lys <sup>54</sup> , Gln <sup>59</sup> , Val <sup>62</sup>                                                                                                                                                 |
| 1BL1   | PTH receptor N-terminus fragment                                                           | Hormone receptor            | -6.53             | 16347.319             | Phe <sup>6</sup> , Leu <sup>7</sup> , Glu <sup>10</sup> , Thr <sup>11</sup> , Arg <sup>12</sup> , Glu <sup>13</sup> , Val <sup>16</sup> , Ile <sup>23</sup> , Tyr <sup>24</sup> , Val <sup>26</sup> , Gly <sup>27</sup>                                                                                                                                                                       |
| 5N7E   | DBL-homology domain of BCR-ABL                                                             | Signaling protein           | -6.38             | 21021.562             | Leu <sup>20</sup> , Tyr <sup>37</sup> , Phe <sup>49</sup> , Glu <sup>50</sup> , Val <sup>51</sup> , Pro <sup>52</sup> , Lys <sup>55</sup> , Thr <sup>57</sup> , Ala <sup>58</sup> , Thr <sup>59</sup> , Ile <sup>60</sup> , Ser <sup>61</sup> , Gly <sup>62</sup>                                                                                                                             |
| 4X1L   | Protein-induced destabilization of profilin 1 in ALC                                       | Protein binding             | -6.35             | 22001.7               | Arg <sup>75</sup> , Gly <sup>82</sup> , Glu <sup>83</sup> , Ser <sup>85</sup> , Gly <sup>122</sup> , Leu <sup>123</sup> , Asn <sup>125</sup> , Lys <sup>126</sup> , Tyr <sup>129</sup> , Glu <sup>130</sup>                                                                                                                                                                                   |
| 2J8B   | Human CD59                                                                                 | Lipid binding protein       | -6.26             | 25697.634             | Asn <sup>5</sup> , Cys <sup>6</sup> , Pro <sup>7</sup> , Asn <sup>9</sup> , Pro <sup>9</sup> , Tyr <sup>36</sup> , Asn <sup>37</sup> , Lys <sup>38</sup> , Cys <sup>39</sup> , Arg <sup>53</sup> , Leu <sup>54</sup> , Arg <sup>55</sup>                                                                                                                                                      |
| 5M3D   | Tuning of CD81LEL (space group p31)                                                        | Cell adhesion               | -6.26             | 25871.712             | Asp <sup>128</sup> , Leu <sup>131</sup> , Gln <sup>132</sup> , Val <sup>135</sup> , Val <sup>136</sup> , Gly <sup>158</sup> , Ser <sup>159</sup> , Ser <sup>160</sup> , Leu <sup>162</sup> , Thr <sup>163</sup> , Thr <sup>166</sup> , Thr <sup>167</sup> , Leu <sup>170</sup> , His <sup>191</sup>                                                                                           |
| 4W9O   | The FK1 domain of FKBP51                                                                   | Isomerase                   | -6.23             | 27123.732             | Ile <sup>25</sup> , Ser <sup>27</sup> , Thr <sup>46</sup> , Pro <sup>47</sup> , Met <sup>48</sup> , Ile <sup>49</sup> , Leu <sup>81</sup> , Asp <sup>91</sup> , Ile <sup>92</sup> , Ala <sup>95</sup> , Thr <sup>96</sup>                                                                                                                                                                     |
| 3I69   | Apo Glutathione transferase A1-1 GIMF-helix                                                | Transferase                 | -6.2              | 28774.302             | Met <sup>94</sup> , Tyr <sup>95</sup> , Gly <sup>98</sup> , Asp <sup>101</sup> , Asn <sup>130</sup> , Arg <sup>131</sup> , Tyr <sup>132</sup> , Pro <sup>134</sup> , Ala <sup>135</sup> , Phe <sup>136</sup> , Lys <sup>138</sup> , Val <sup>139</sup>                                                                                                                                        |
| 3KLT   | A vimentin fragment                                                                        | Structural protein          | -5.9              | 47182.032             | Ala <sup>212</sup> , Glu <sup>215</sup> , Ser <sup>216</sup> , Tyr <sup>219</sup> , Arg <sup>220</sup> , Val <sup>223</sup> , Gln <sup>224</sup>                                                                                                                                                                                                                                              |
